# Supplementary material
Source: PubMed Central journal article supplement (PMC10626520)

## Supplemental Material

### **Respirometric Screening and Characterization of Mitochondrial Toxicants Within the ToxCast Phase I and II Chemical Libraries**

---

Daniel R. Hallinger<sup>1</sup>, Hayley B. Lindsay<sup>2</sup>, Katie Paul Friedman<sup>1</sup>, Danielle A. Suarez<sup>3</sup>, and Steven O. Simmons<sup>1</sup>

<sup>1</sup>National Center for Computational Toxicology; <sup>2</sup>Oak Ridge Associated Universities, Contractor; <sup>3</sup>Environmental and Public Health Division, National Health and Environmental Effects Research Laboratory, Office of Research and Development, U.S. Environmental Protection Agency

Authors DRH and HBL contributed equally to this work.

**Corresponding Author:**

Steven O. Simmons, Ph.D.  
109 TW Alexander Drive  
MD B205-01  
Research Triangle Park, North Carolina 27711 USA

**Supplemental Figure 2 shows the temporal dose-response plots (median % initial respiration  $\pm$  mad) for all 243 chemicals tested in Tier 2 RSA screening.**







































































## 7,12-Dimethylbenz(a)anthracene

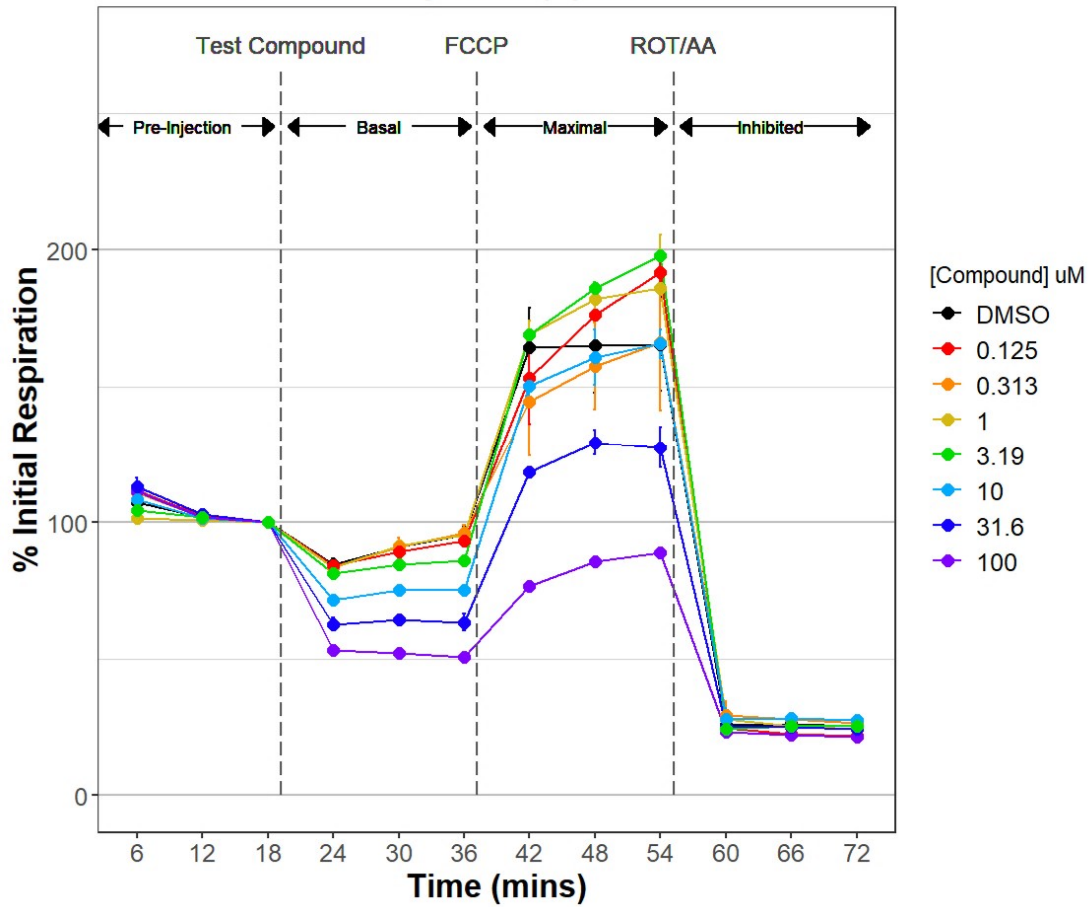

## 9-Phenanthrol

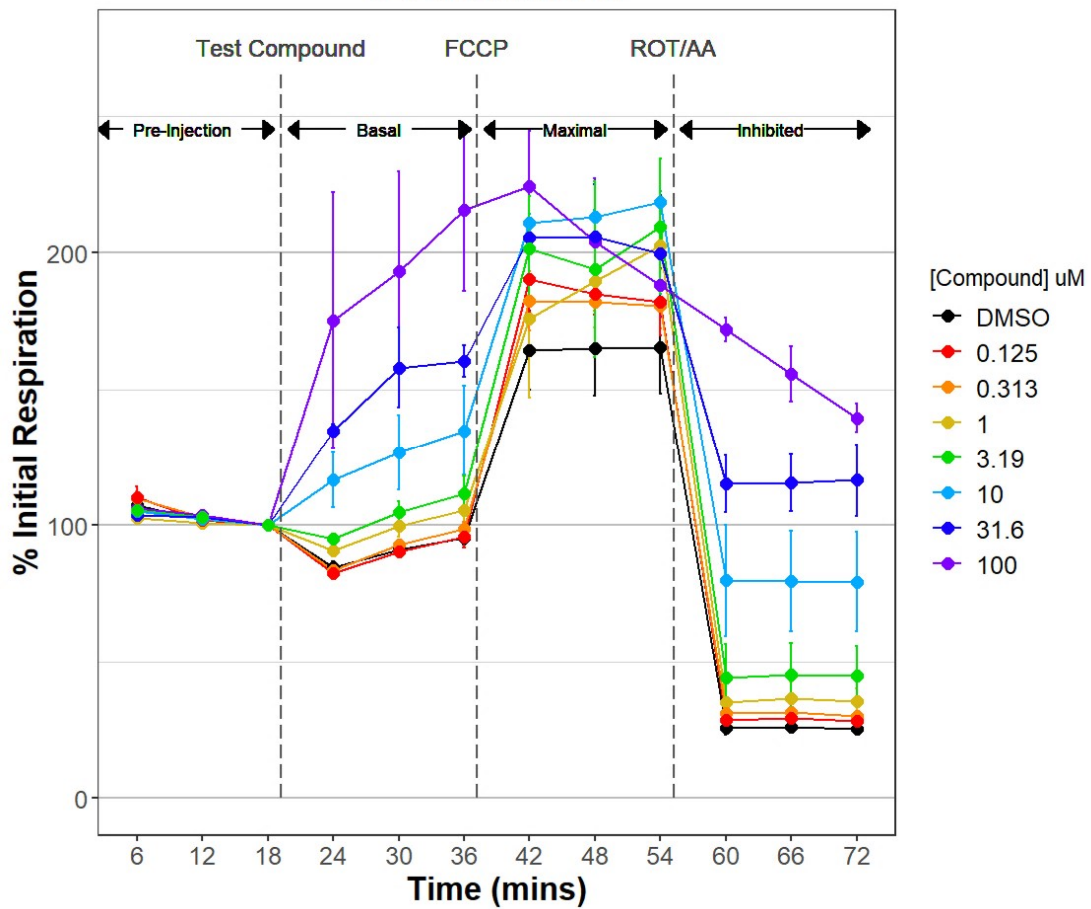





## Acetochlor

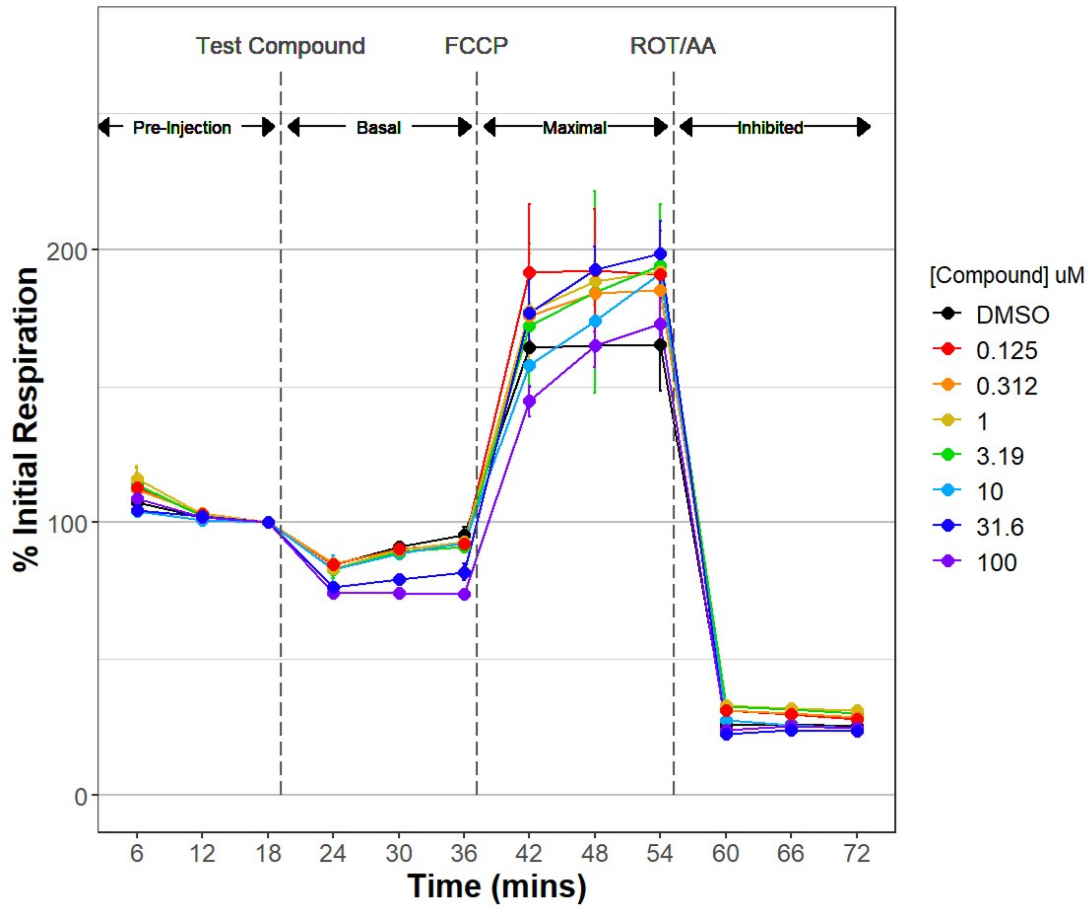

## Alachlor

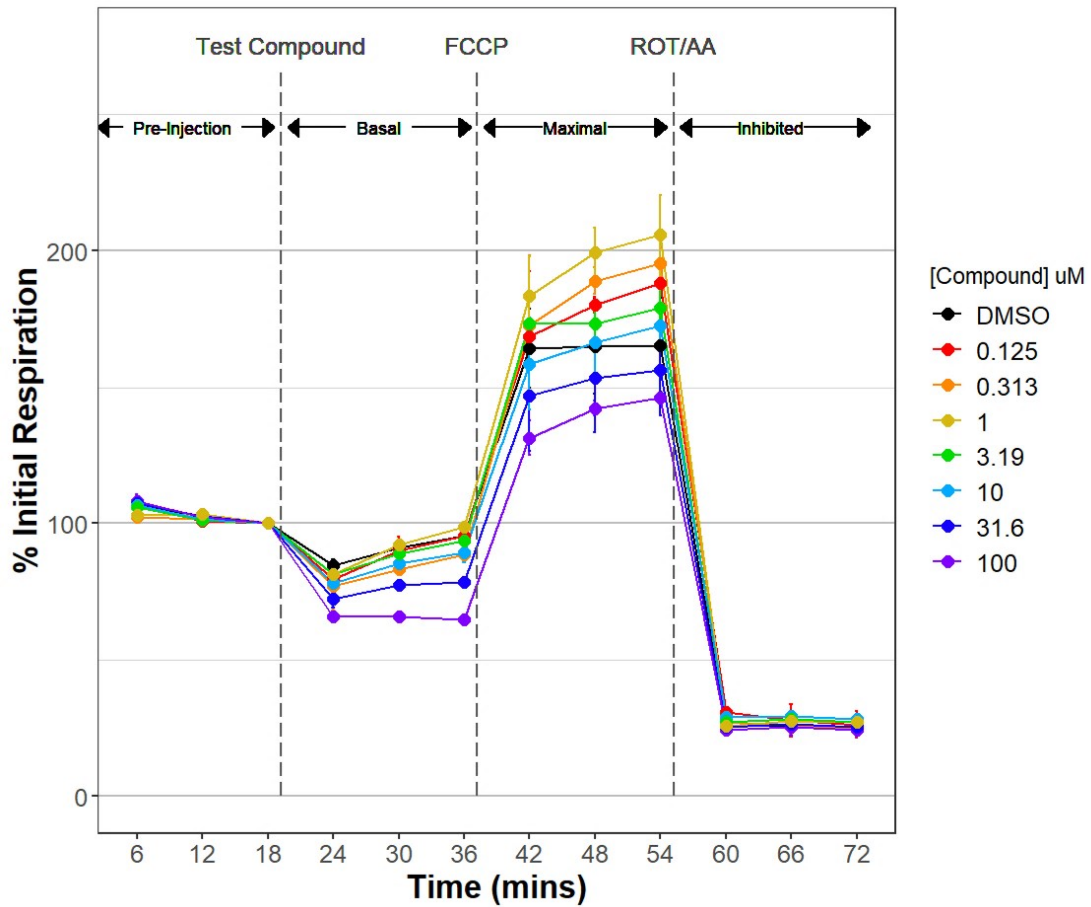



































### Carminic acid

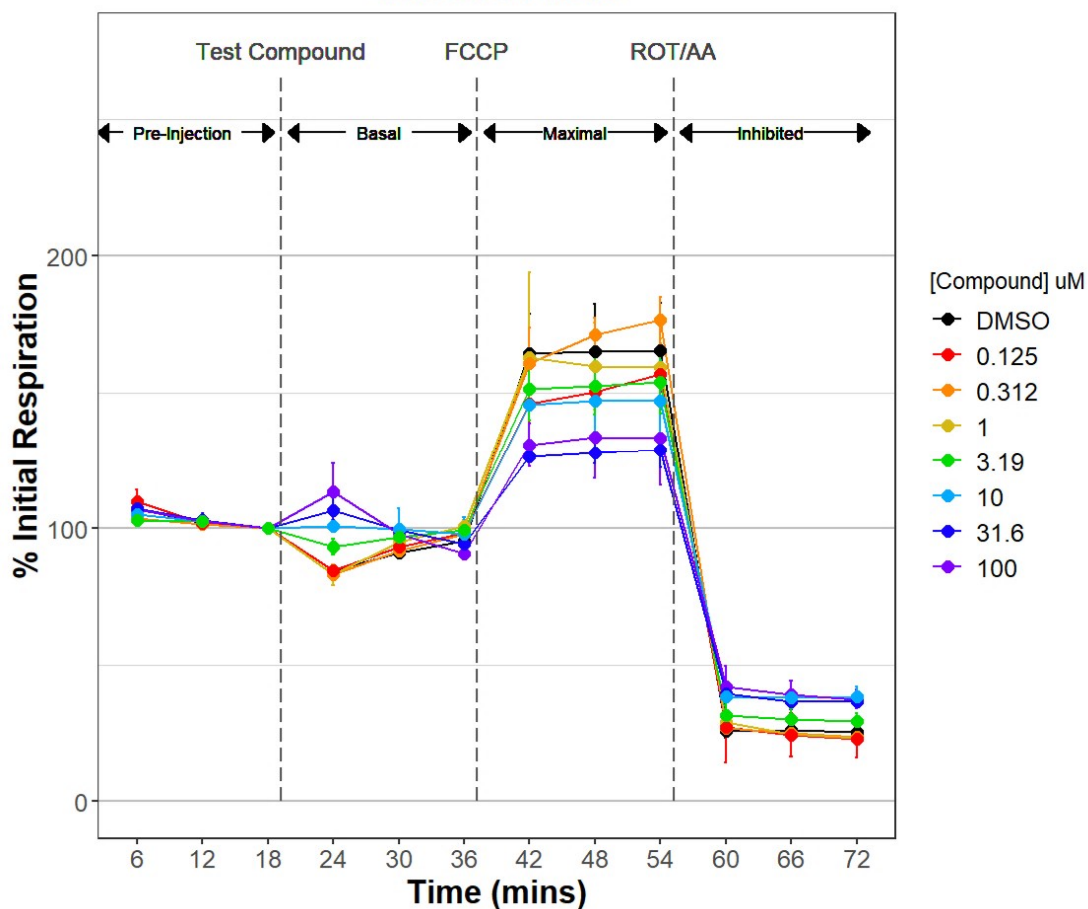

### Chlorothalonil

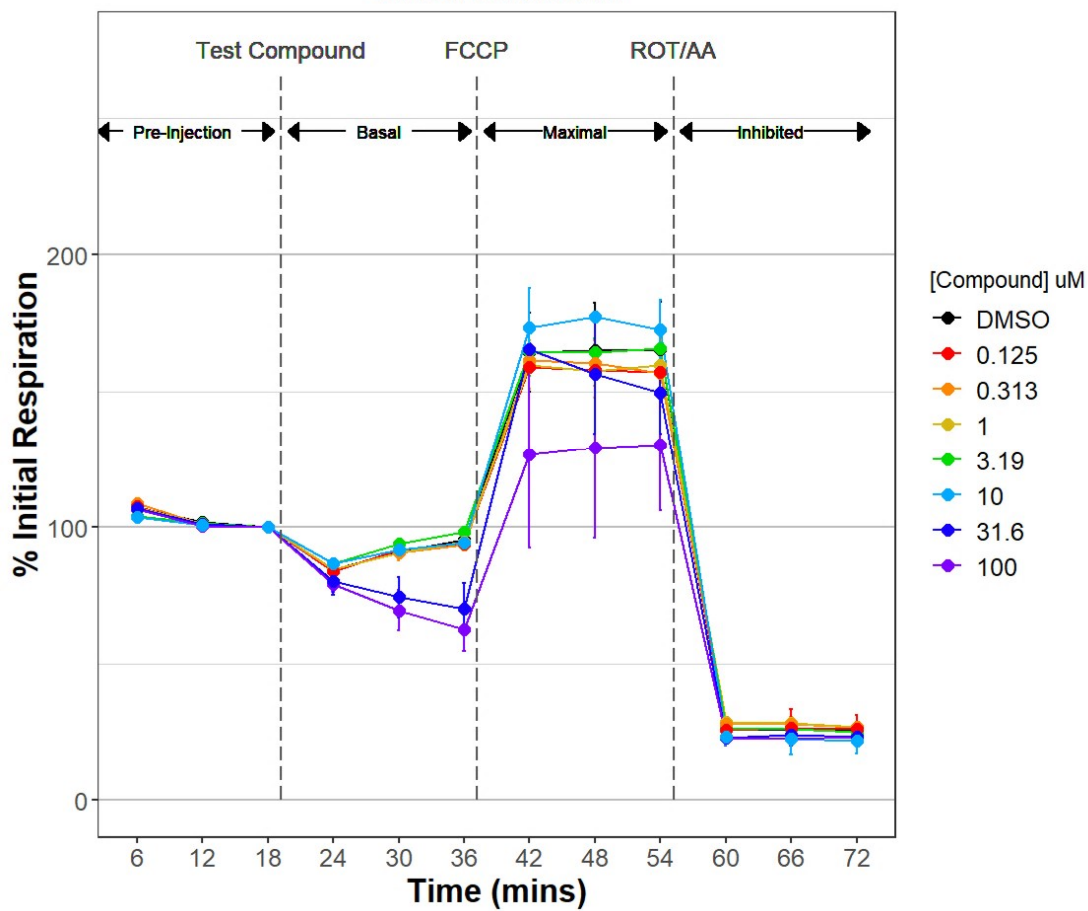







































### Fabesetron hydrochloride

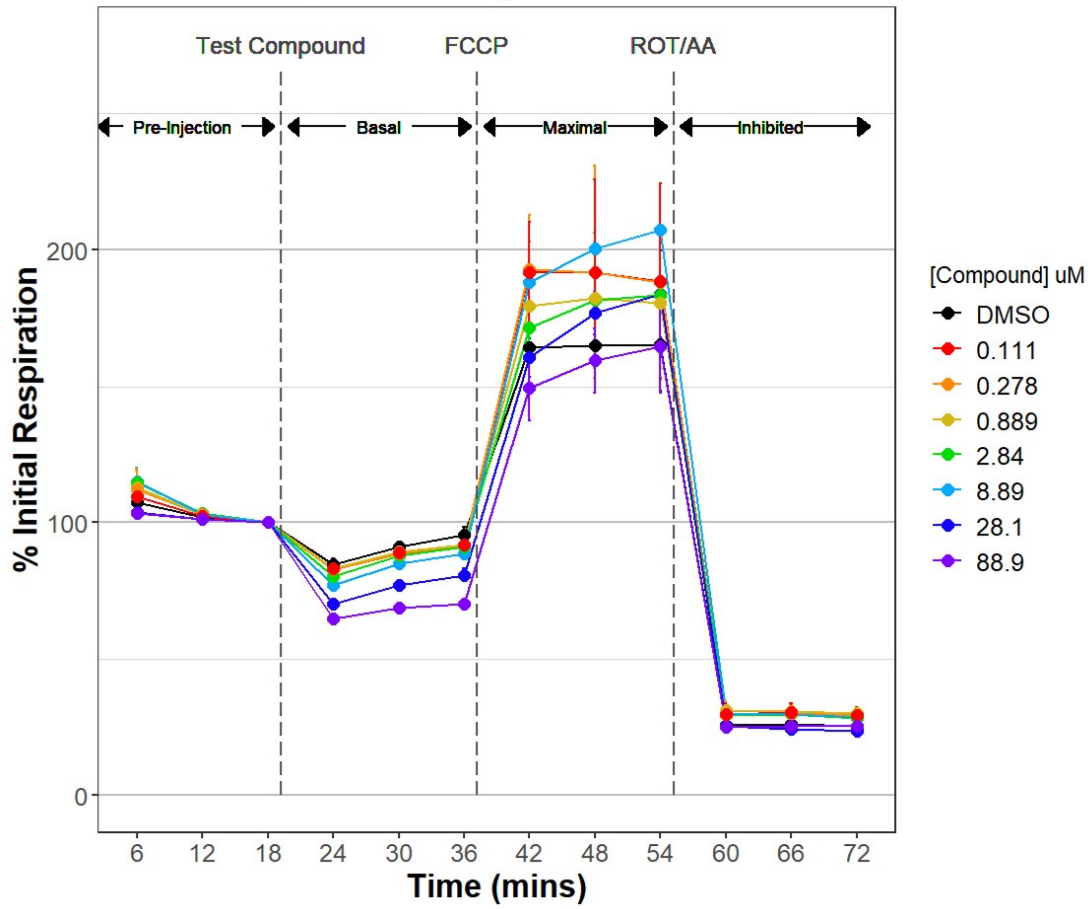

### Famoxadone

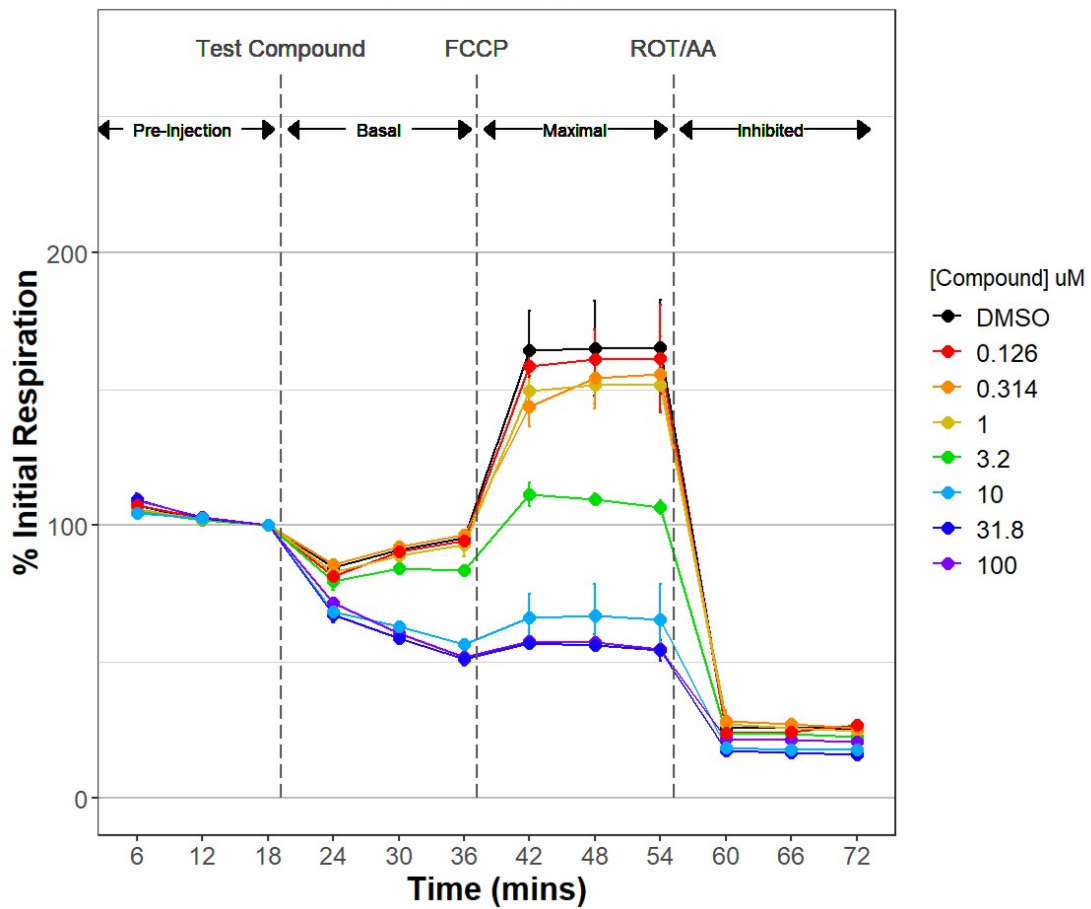

















## Fluoxastrobin

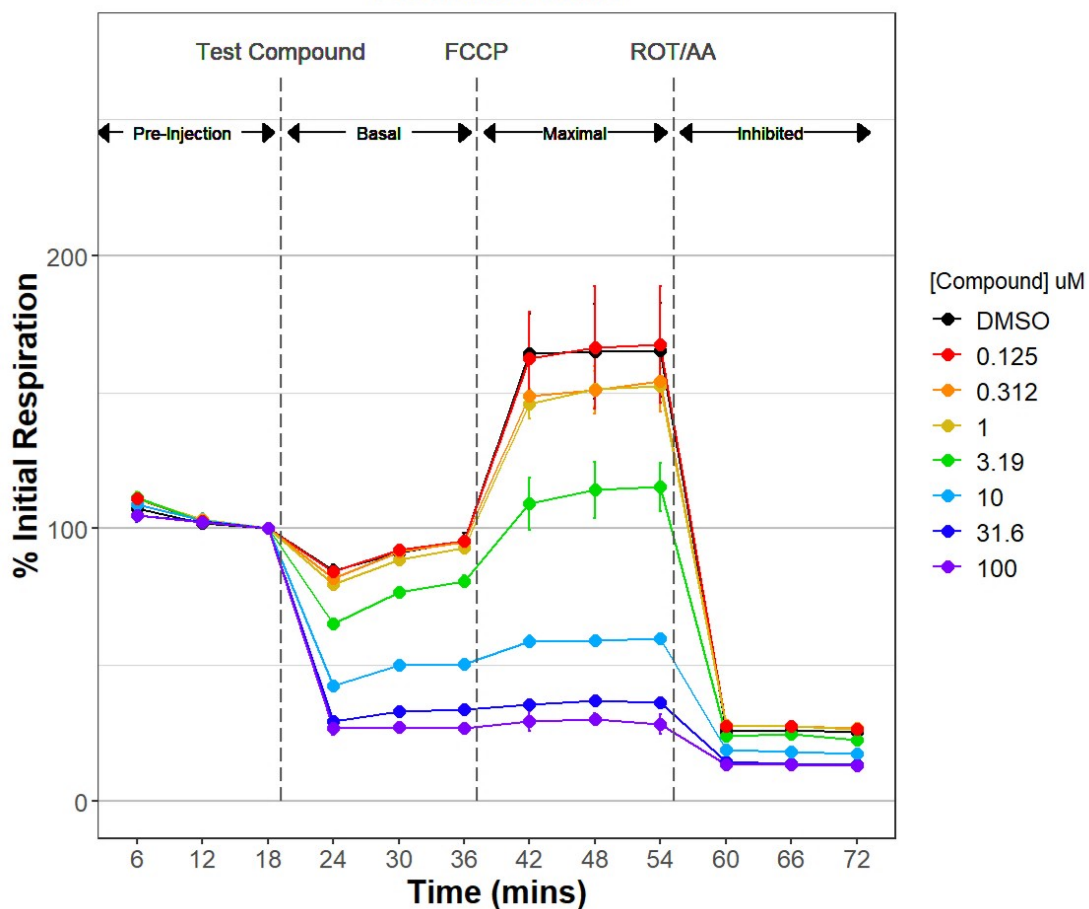

## Flusilazole

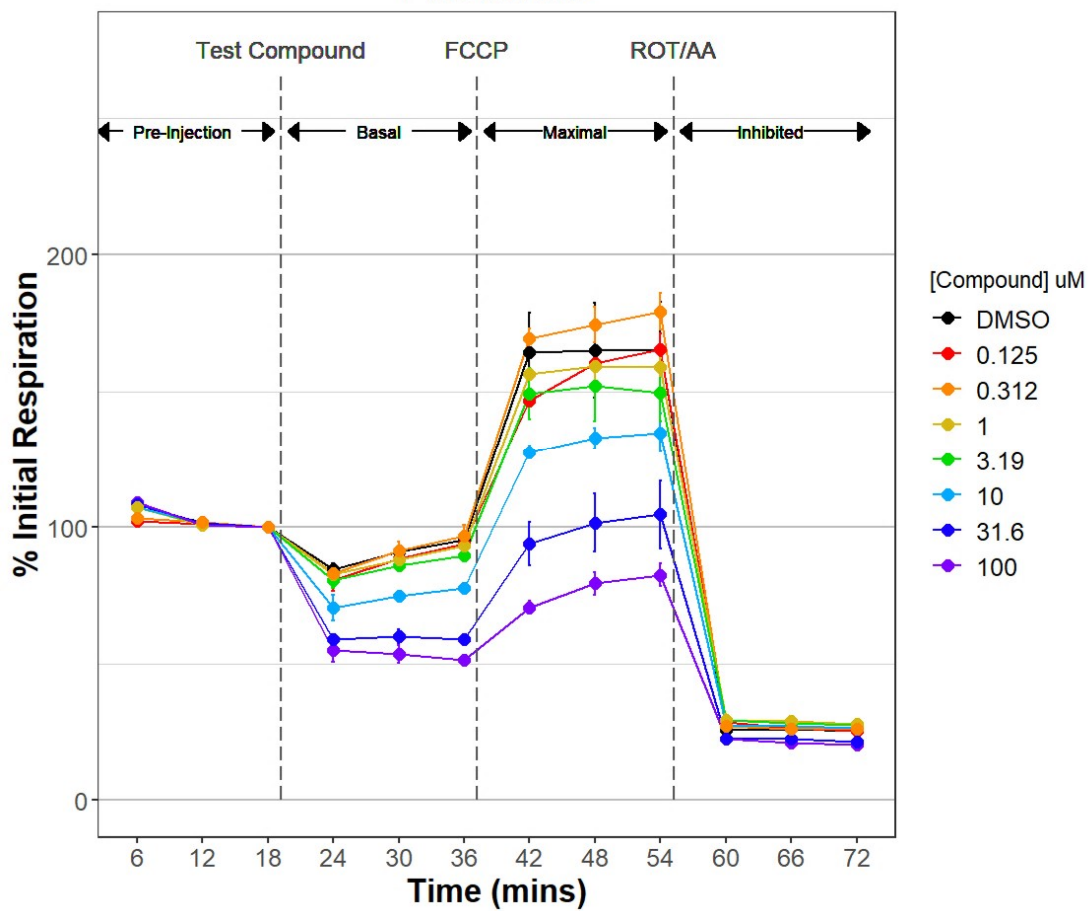

### Forchlorfenuron

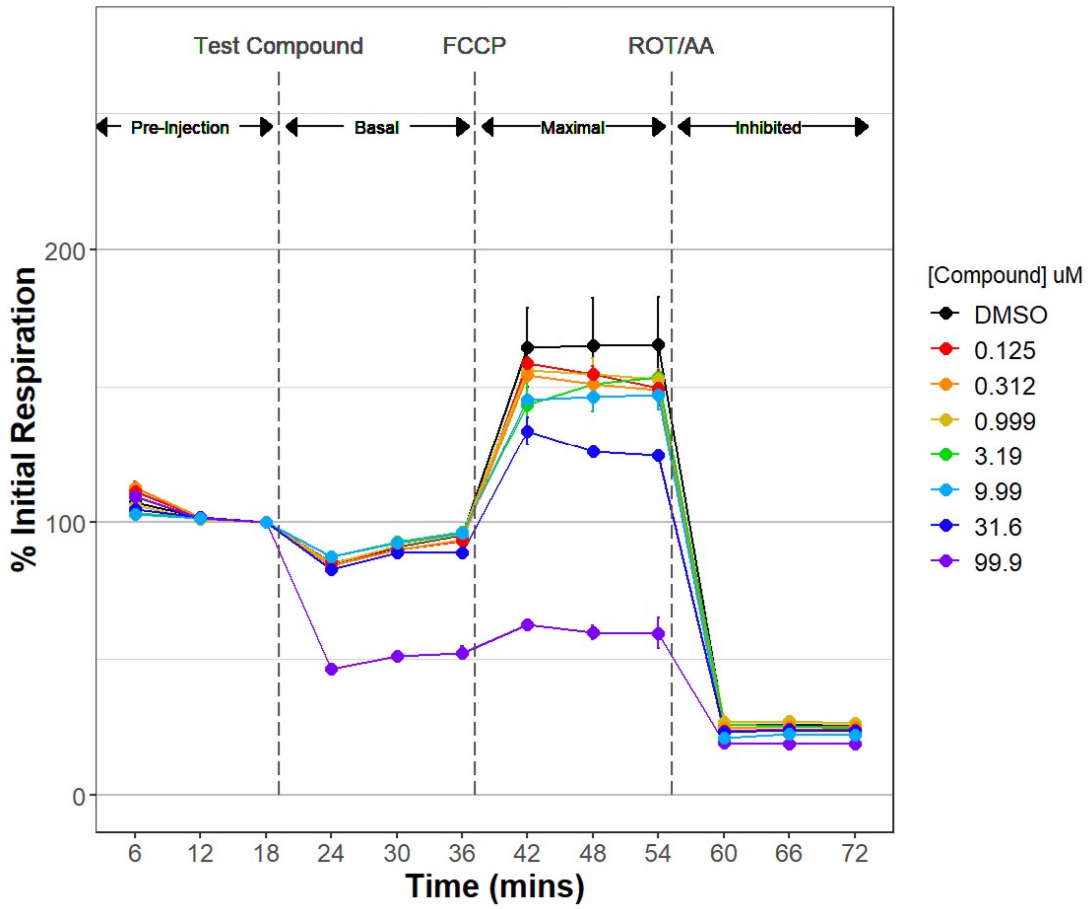

### Gentian Violet

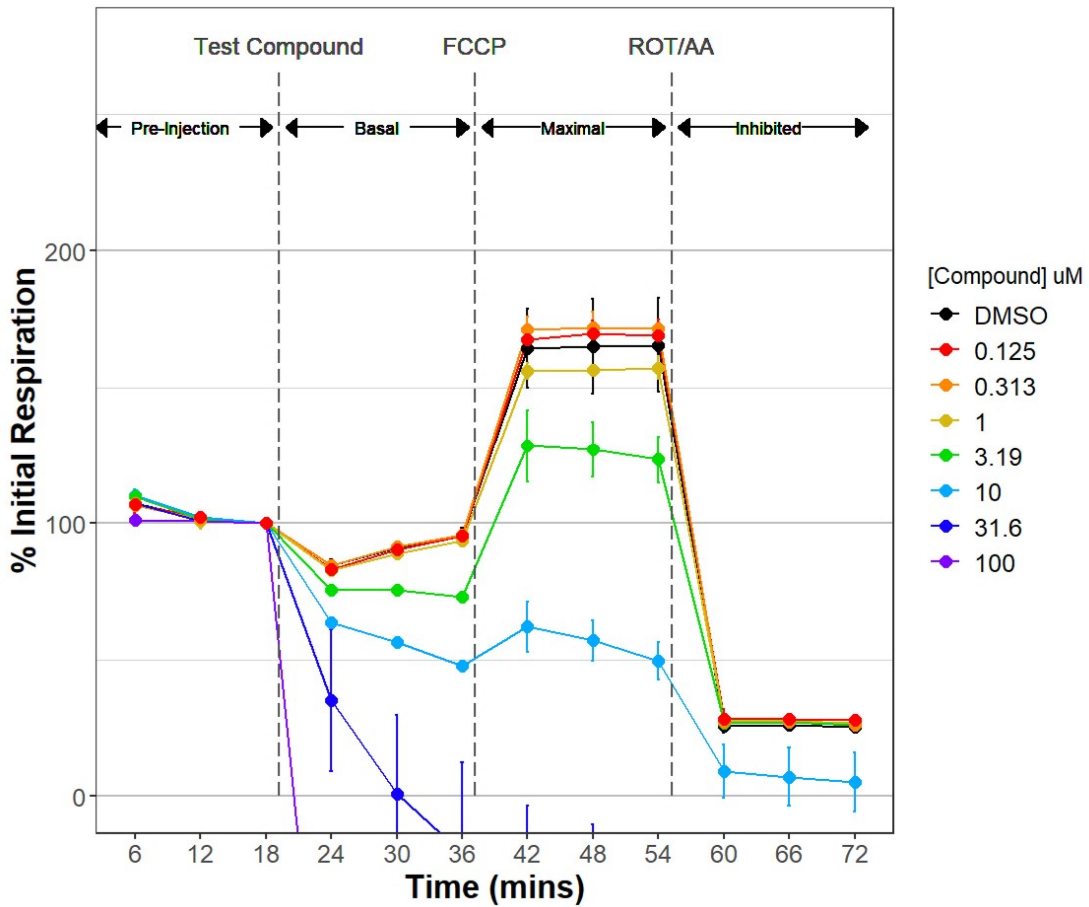































### Nitrofurazone

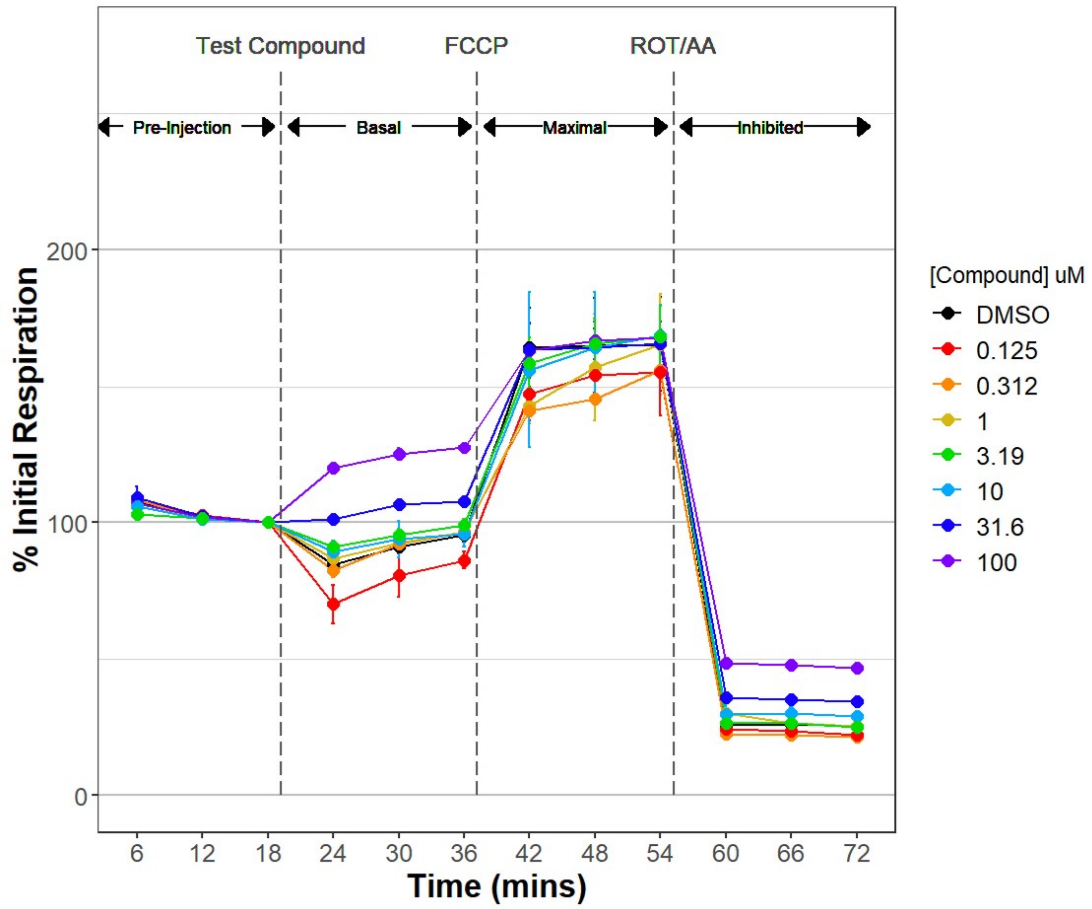

### Octhilinone

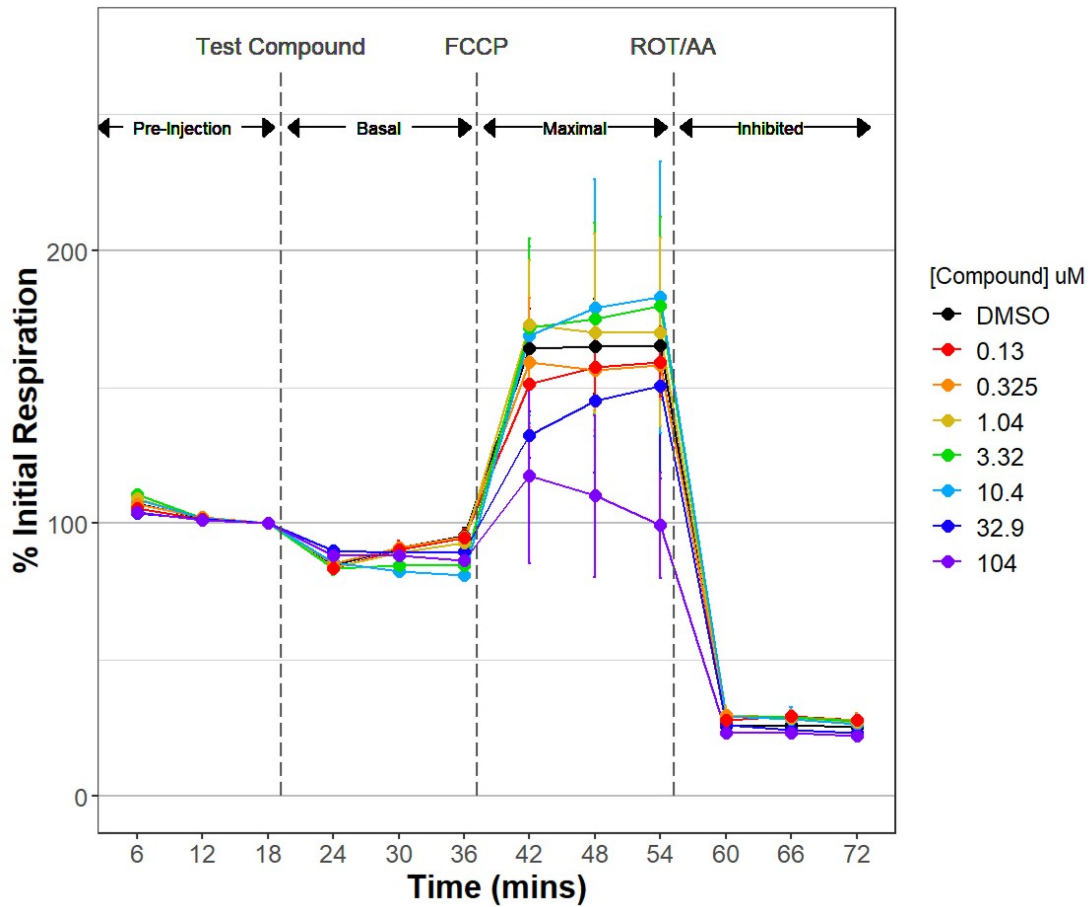













### Perfluoroundecanoic acid

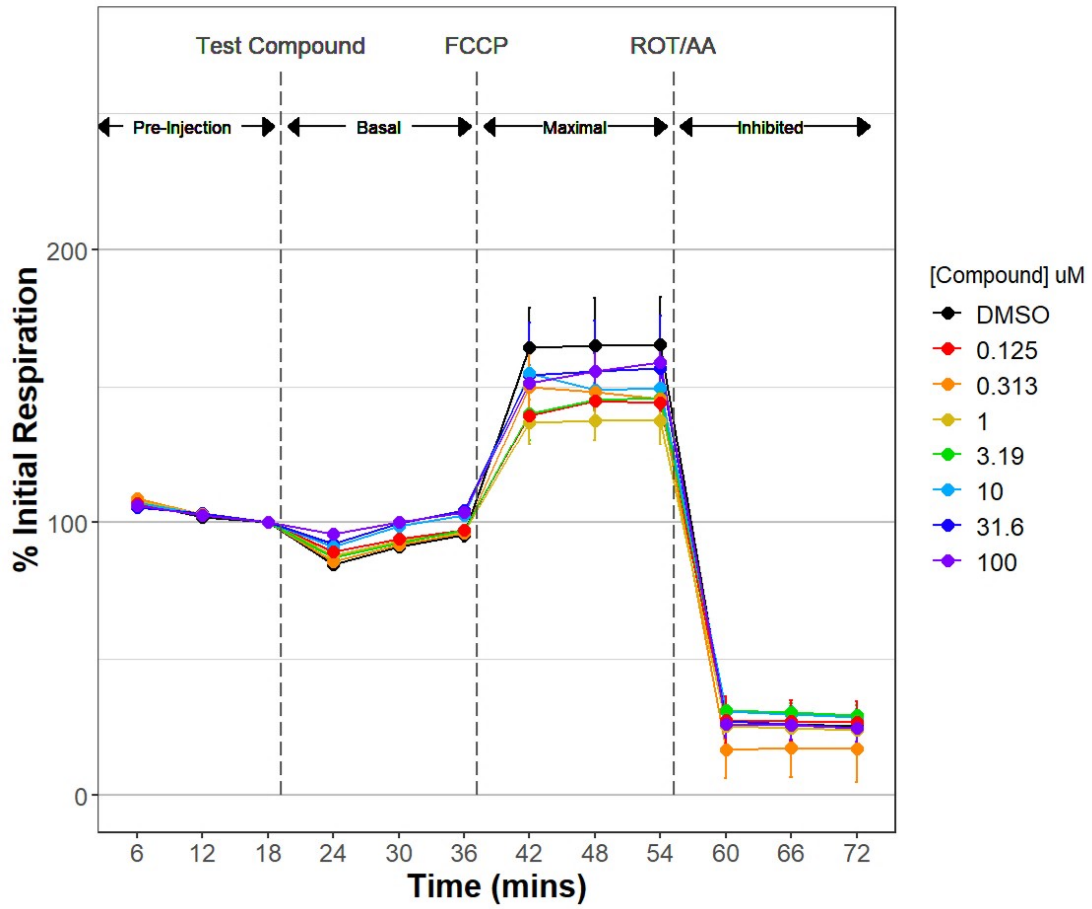

### PharmaGSID\_47337

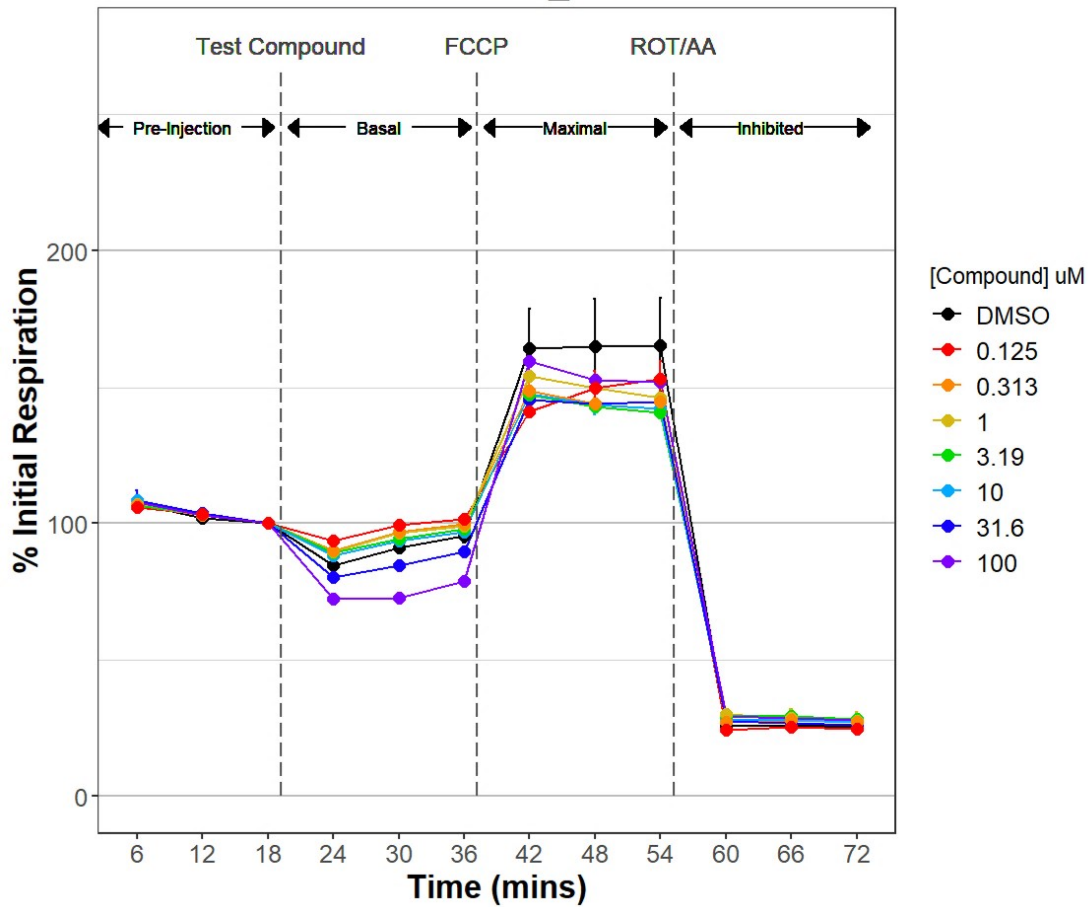

























## Pyraclostrobin

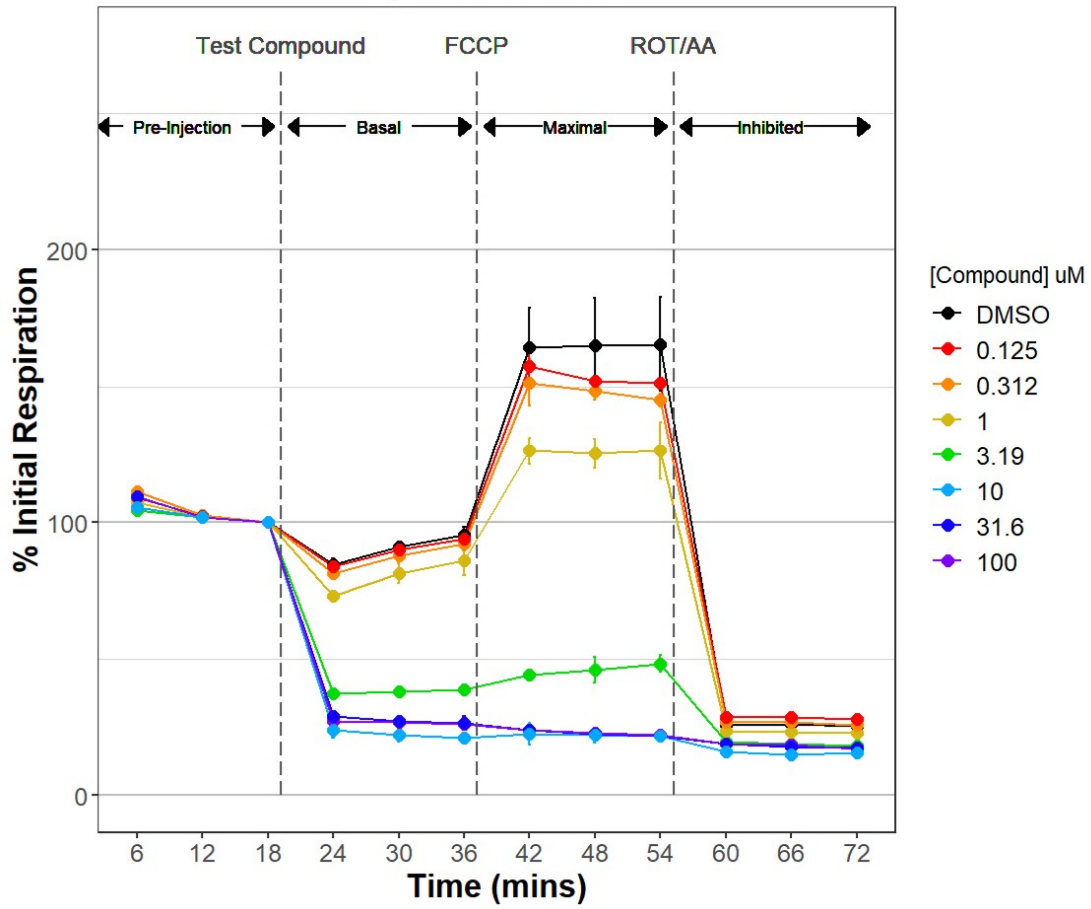

## Pyridaben

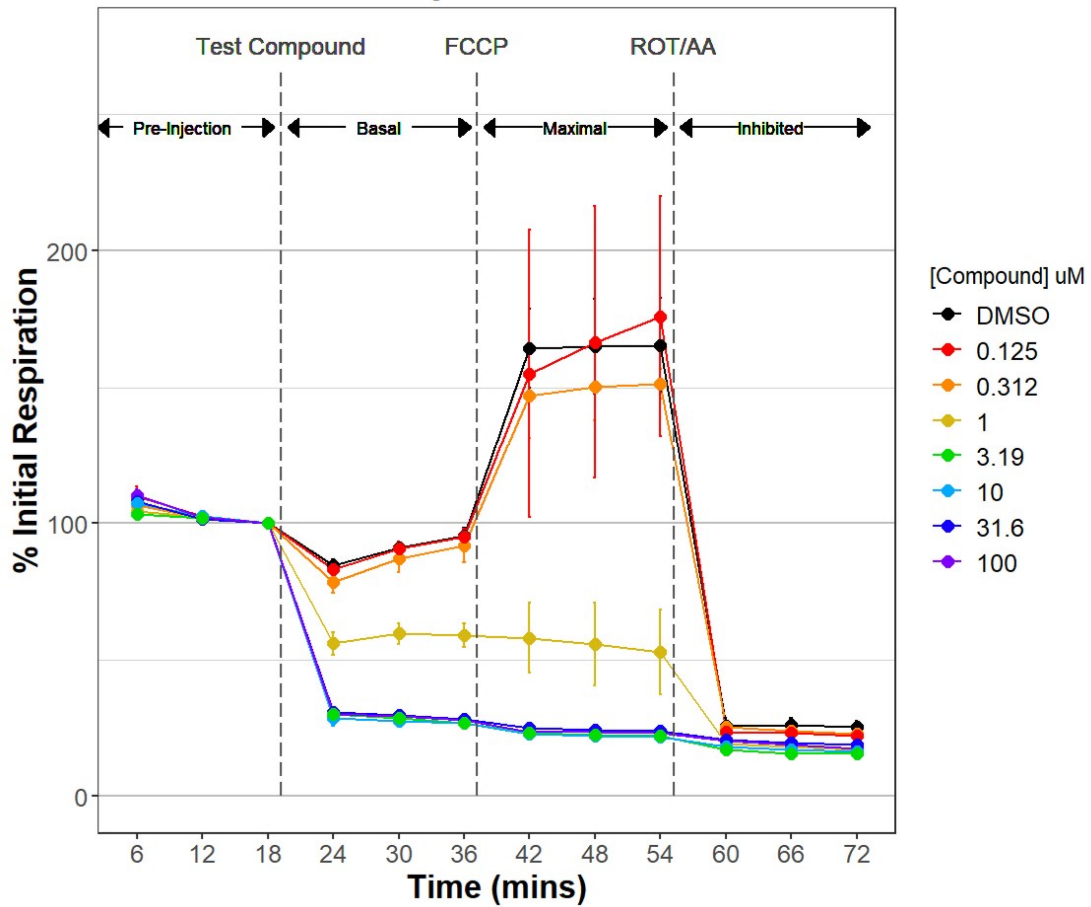

































### Tributyltin methacrylate

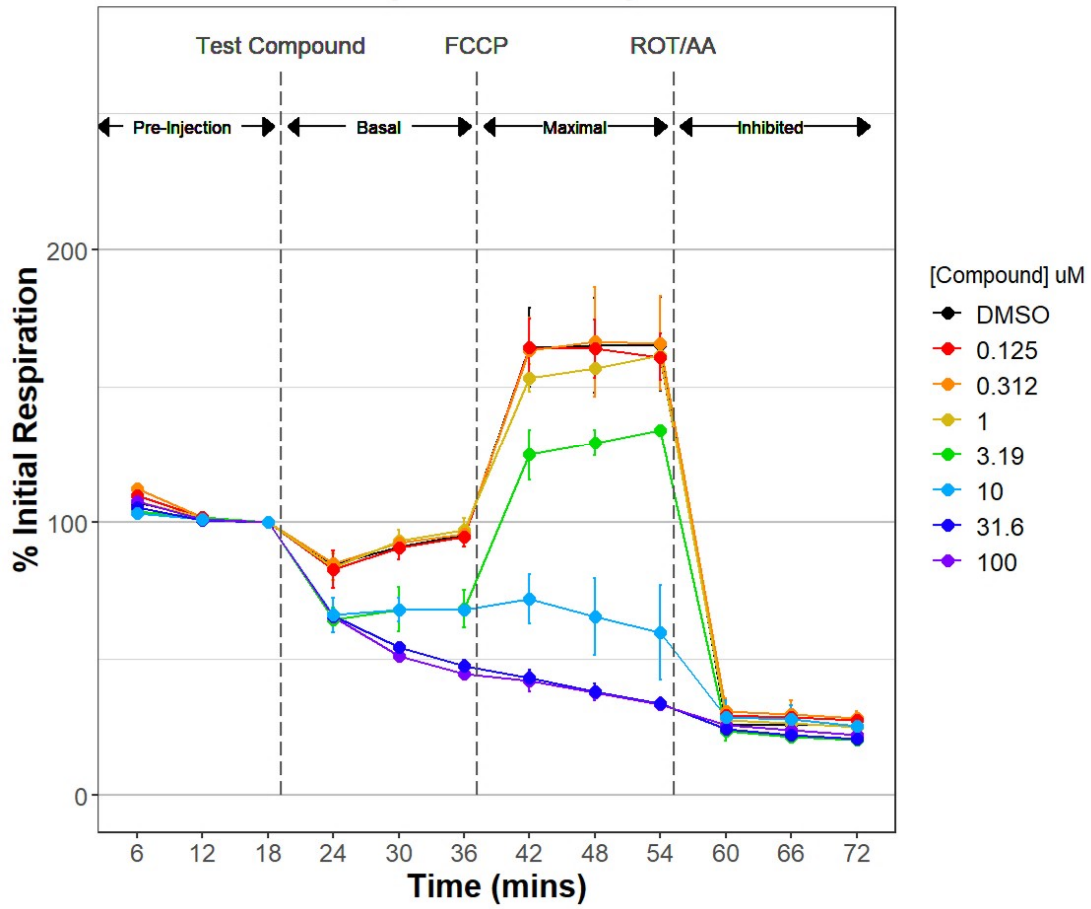

### Triclopyr

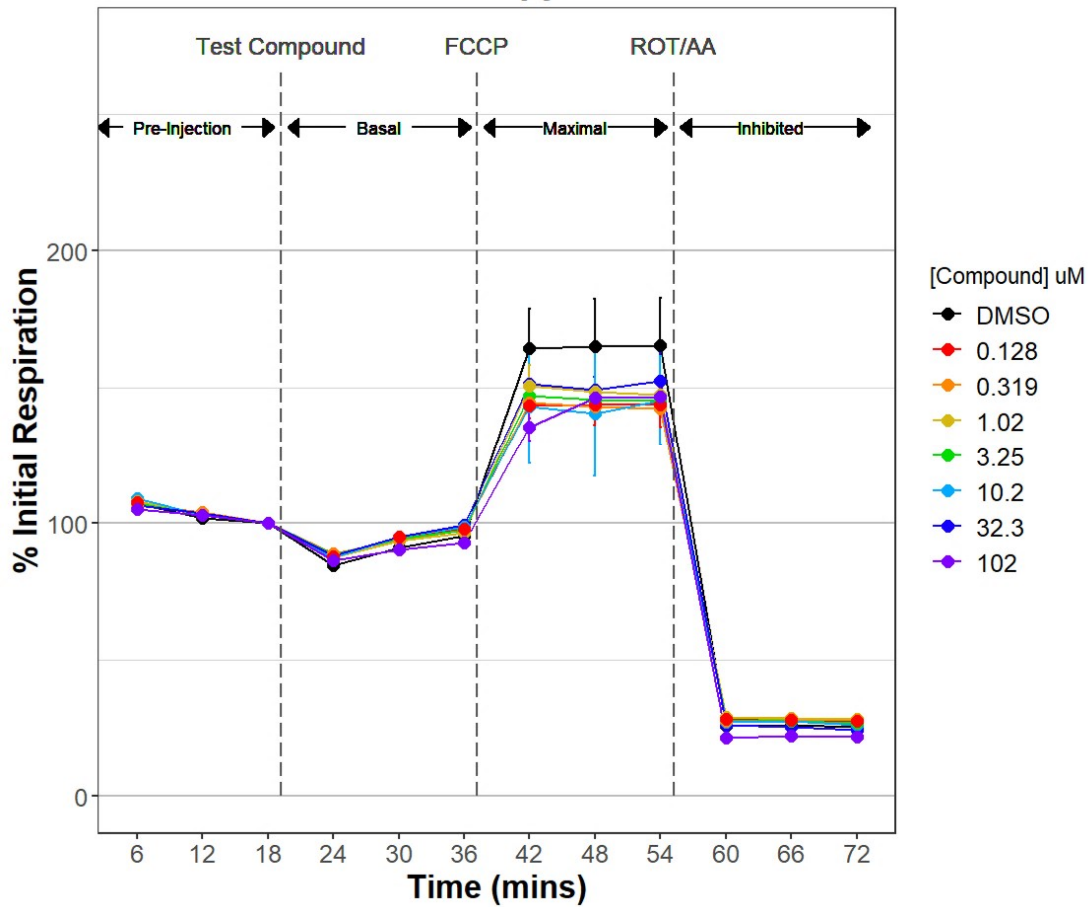

Supplement: NIHMS1679657-supplement-S3.pdf [file NIHMS1679657-supplement-S3.pdf]
