# Supplementary material
Source: PubMed Central journal article supplement (PMC10626520)

## Supplemental Material

### **Respirometric Screening and Characterization of Mitochondrial Toxicants Within the ToxCast Phase I and II Chemical Libraries**

---

Daniel R. Hallinger<sup>1</sup>, Hayley B. Lindsay<sup>2</sup>, Katie Paul Friedman<sup>1</sup>, Danielle A. Suarez<sup>3</sup>, and Steven O. Simmons<sup>1</sup>

<sup>1</sup>National Center for Computational Toxicology; <sup>2</sup>Oak Ridge Associated Universities, Contractor; <sup>3</sup>Environmental and Public Health Division, National Health and Environmental Effects Research Laboratory, Office of Research and Development, U.S. Environmental Protection Agency

Authors DRH and HBL contributed equally to this work.

**Corresponding Author:**

Steven O. Simmons, Ph.D.  
109 TW Alexander Drive  
MD B205-01  
Research Triangle Park, North Carolina 27711 USA

**Supplemental Figure 3 shows the temporal dose-response plots (median % initial respiration  $\pm$  mad) for all 149 ETCi chemicals tested in the EFA.**

## 2,2',4,4'-Tetrahydroxybenzophenone

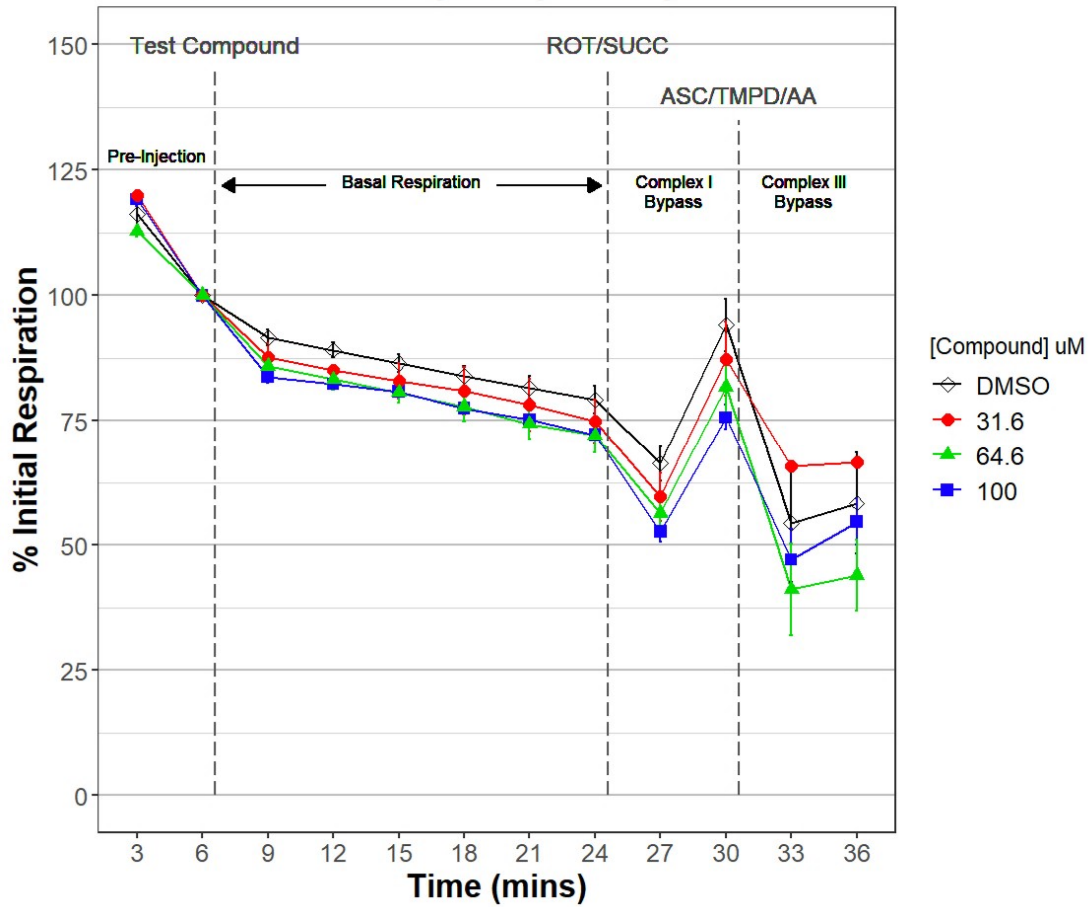

## 2,2-Bis(4-hydroxyphenyl)-1,1,1-trichloroethane

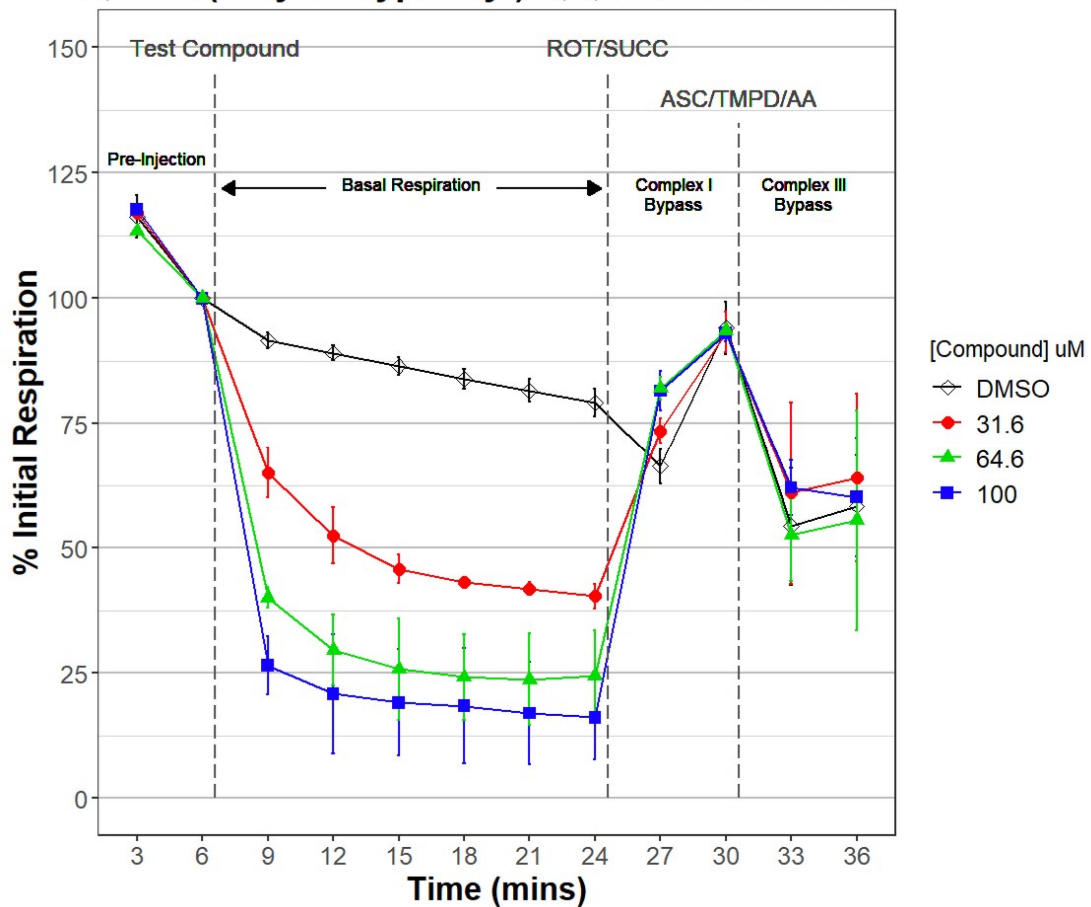

## 2,4,7,9-Tetramethyl-5-decyne-4,7-diol

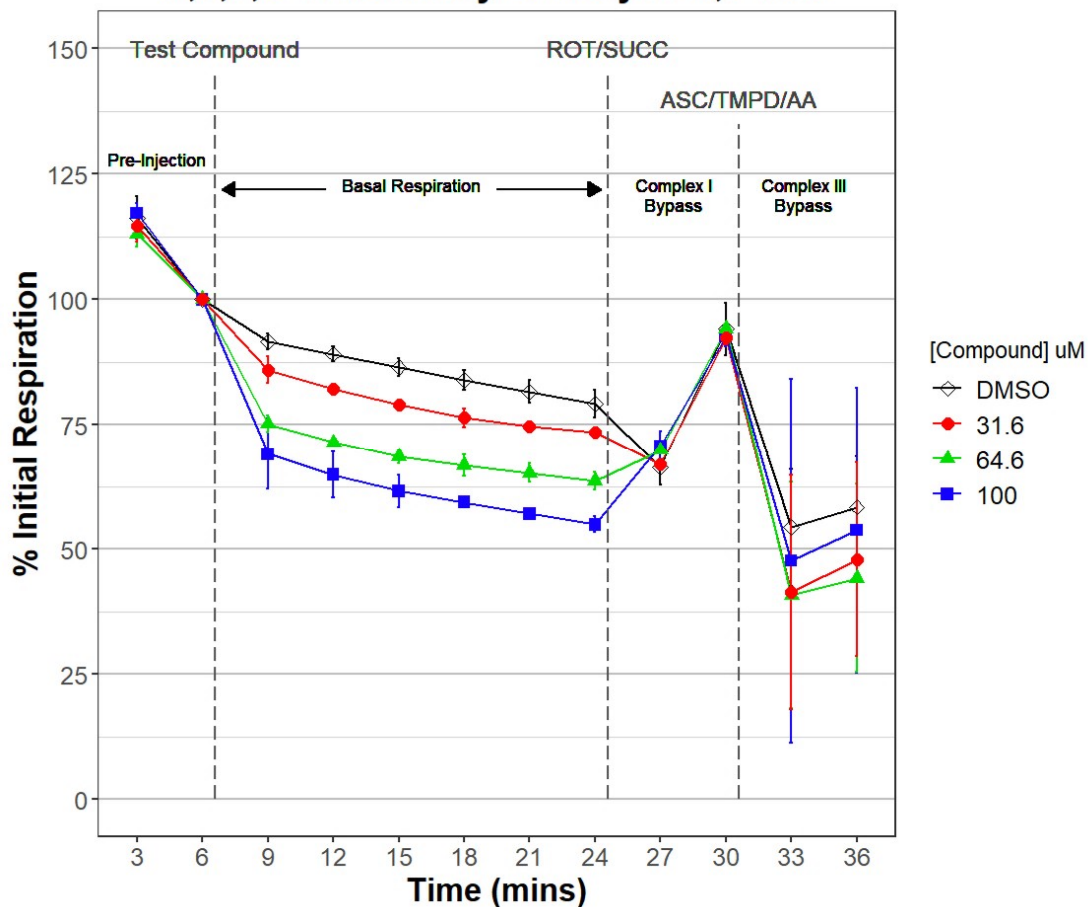

## 2,4-Bis(1-methyl-1-phenylethyl)phenol

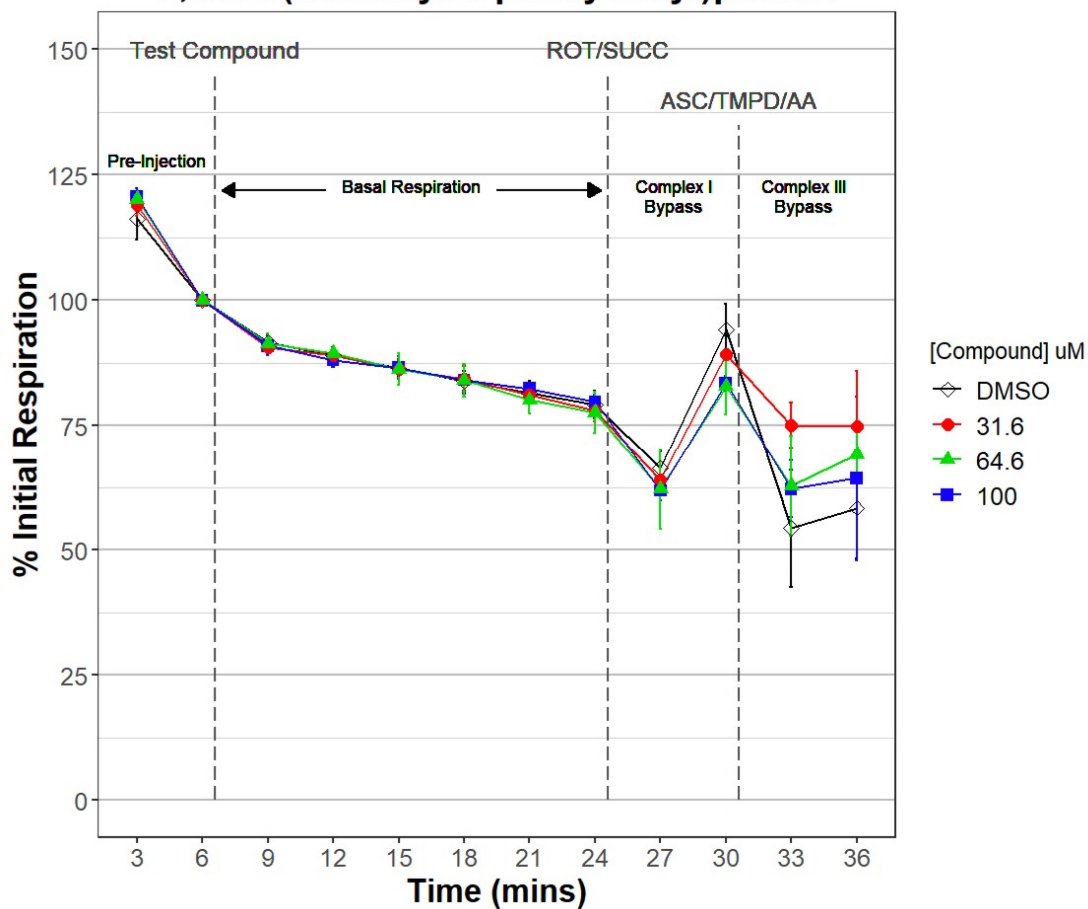

## 2,4-Di-tert-pentylphenol

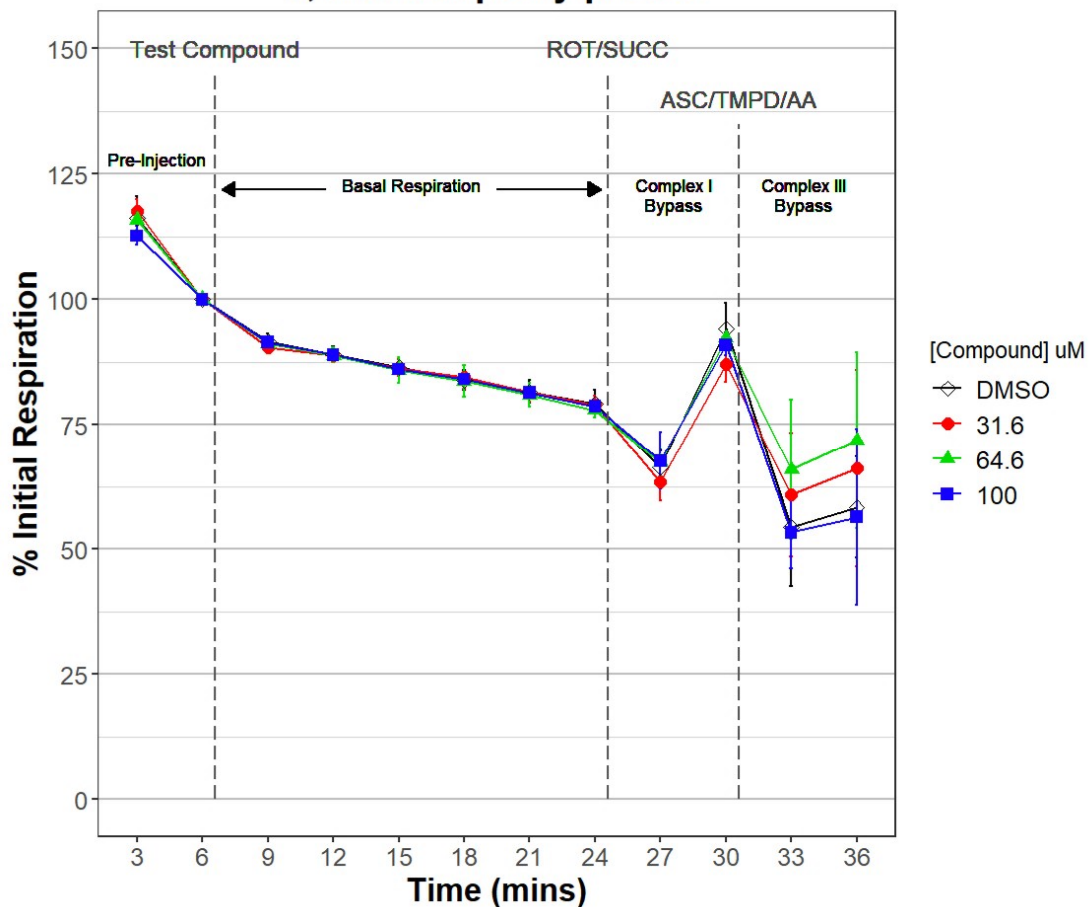

## 2,5-Di-tert-butylbenzene-1,4-diol

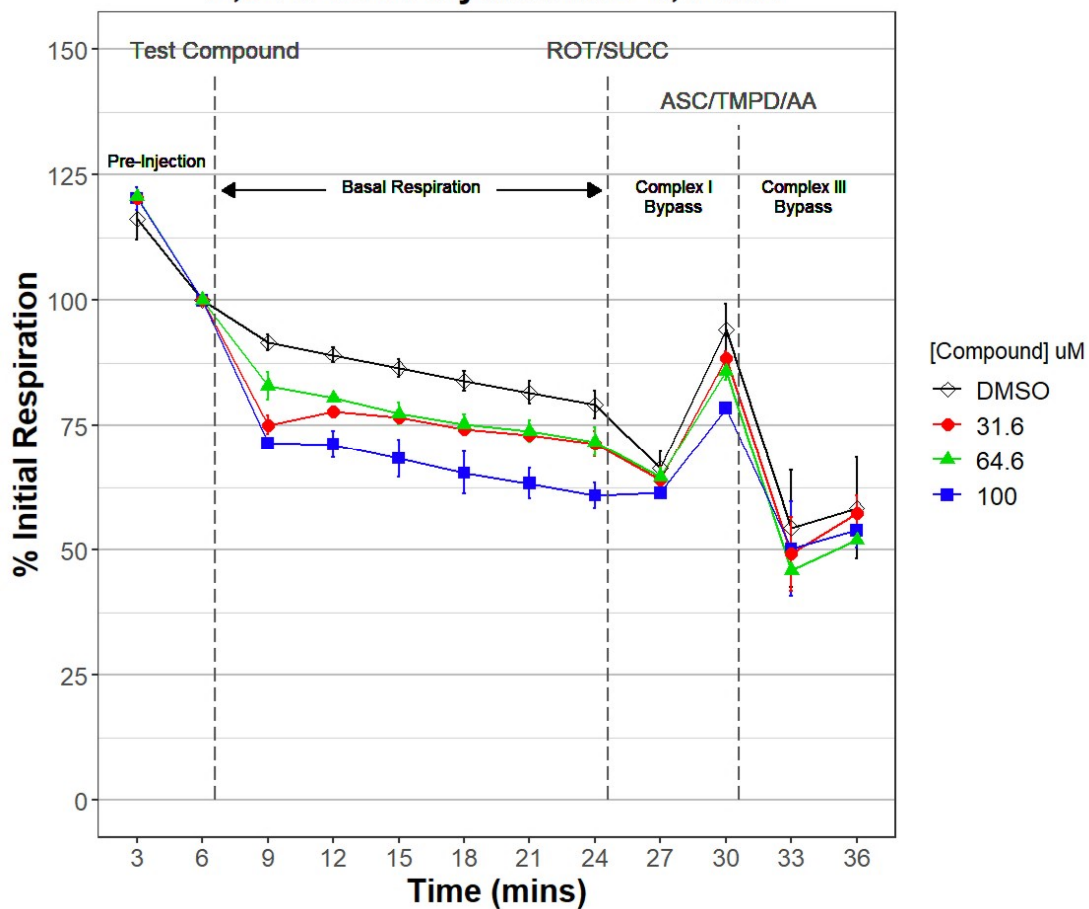



## 2-(Thiocyanomethylthio)benzothiazole

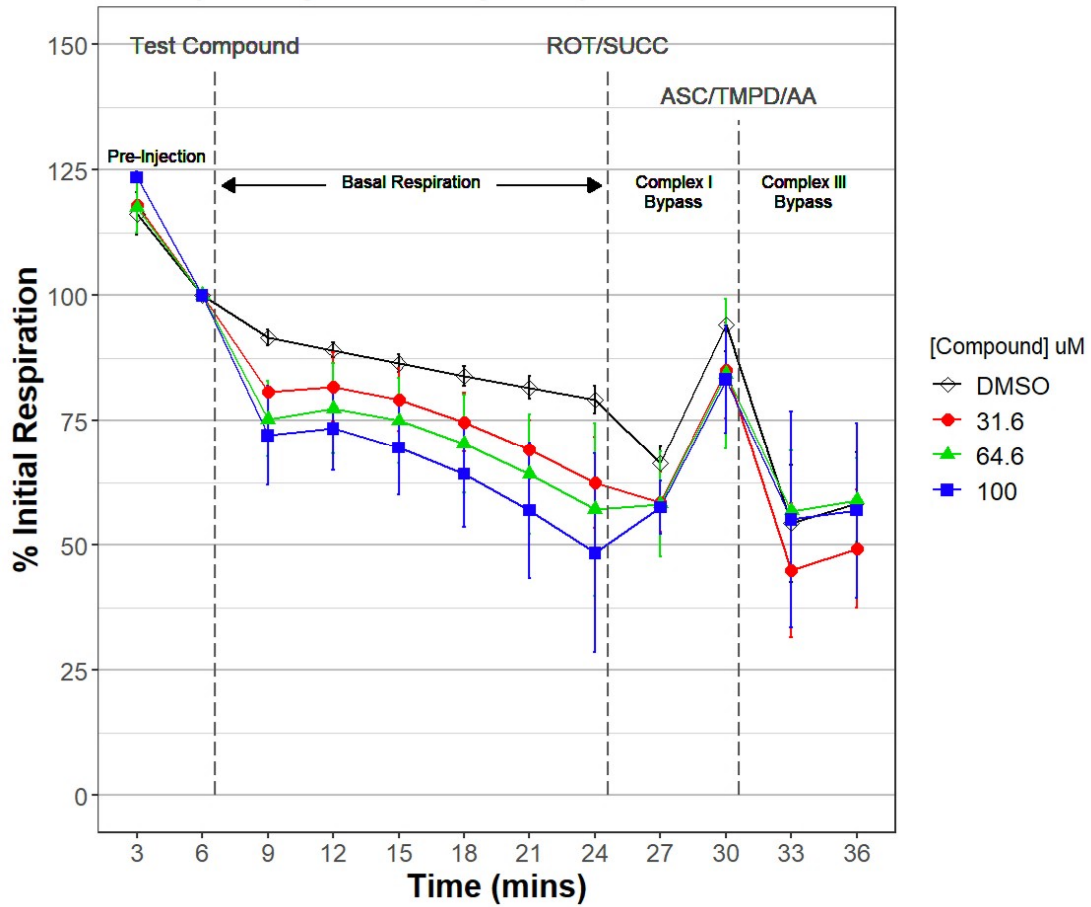

## 2-Tert-Butyl-5-methylphenol

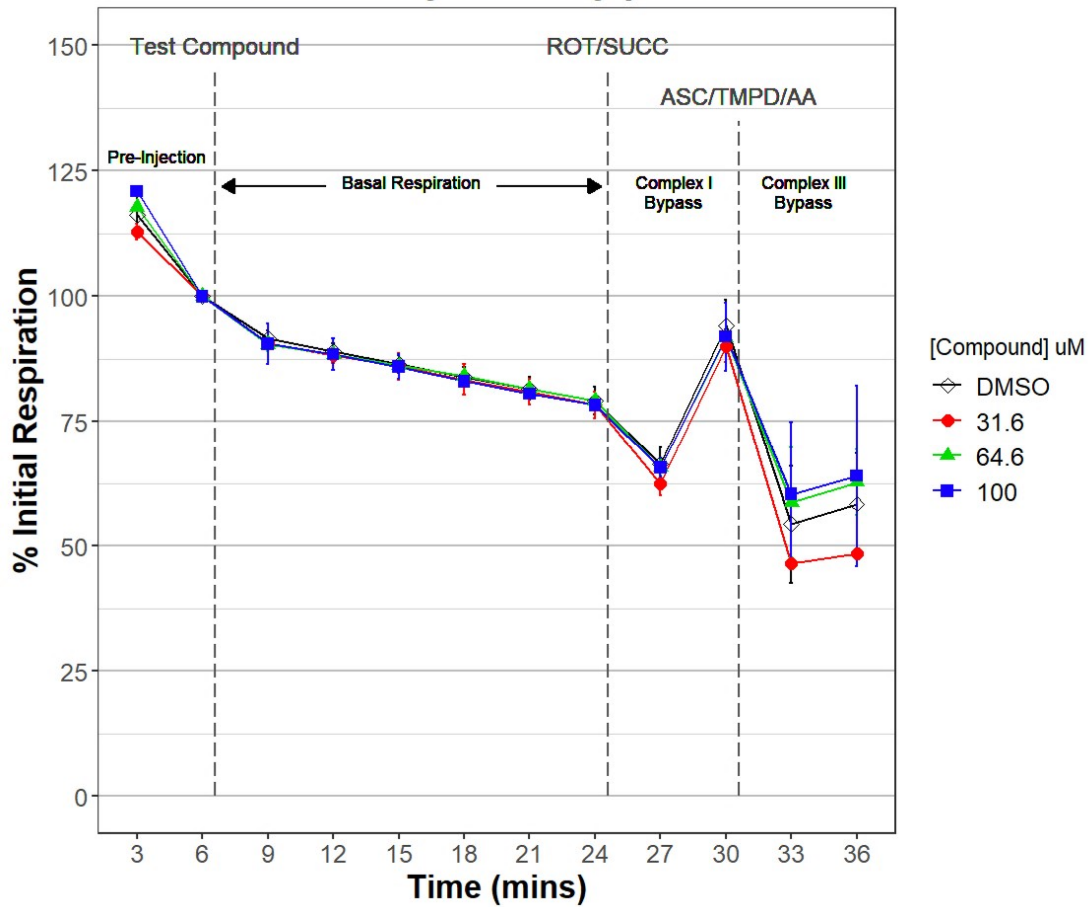

## 2-tert-Butyl-4-ethylphenol

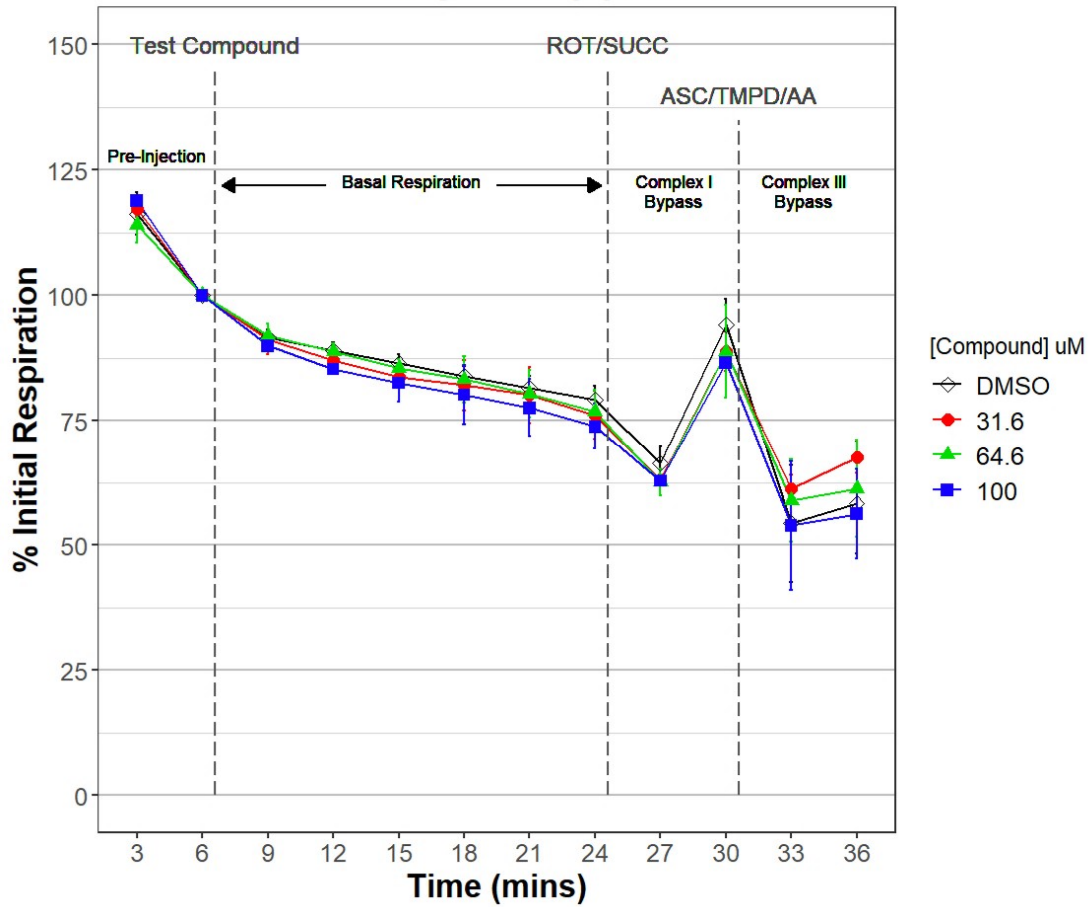

## 2-tert-Butyl-4-methoxyphenol

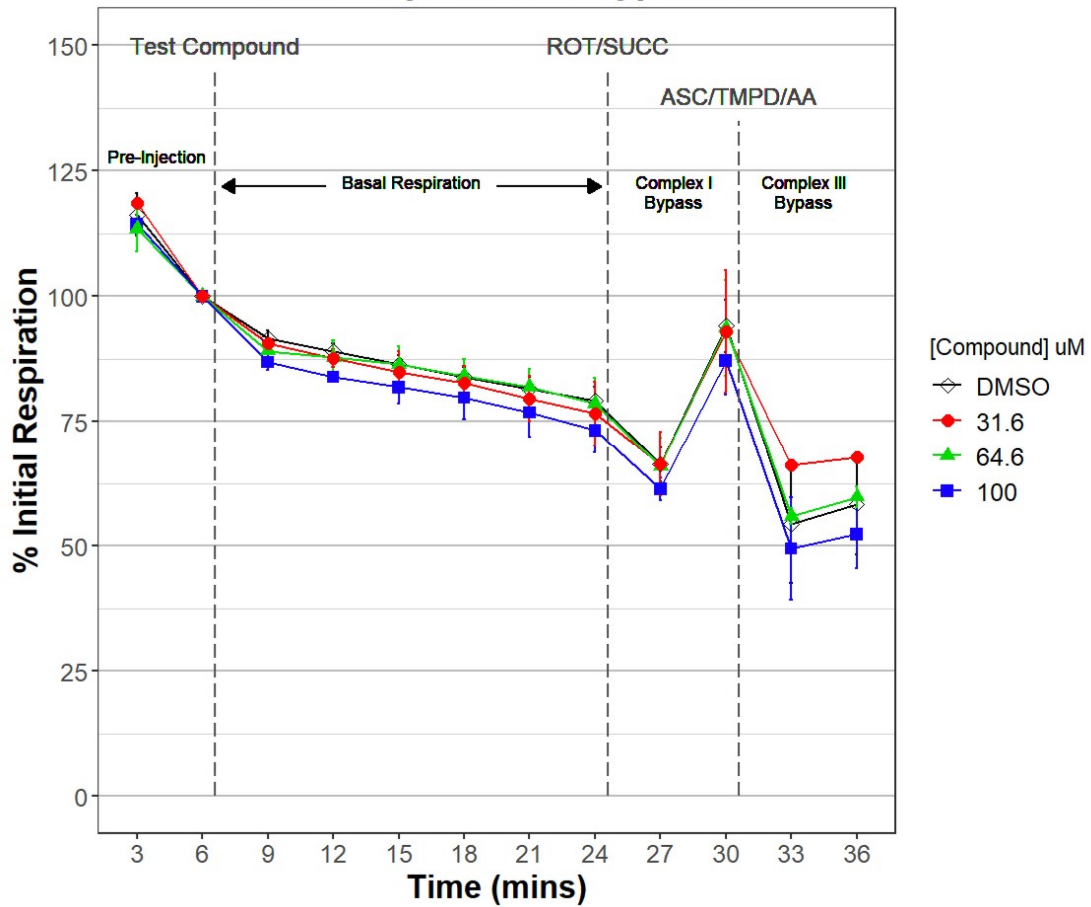

### 3,3',5,5'-Tetrabromobisphenol A

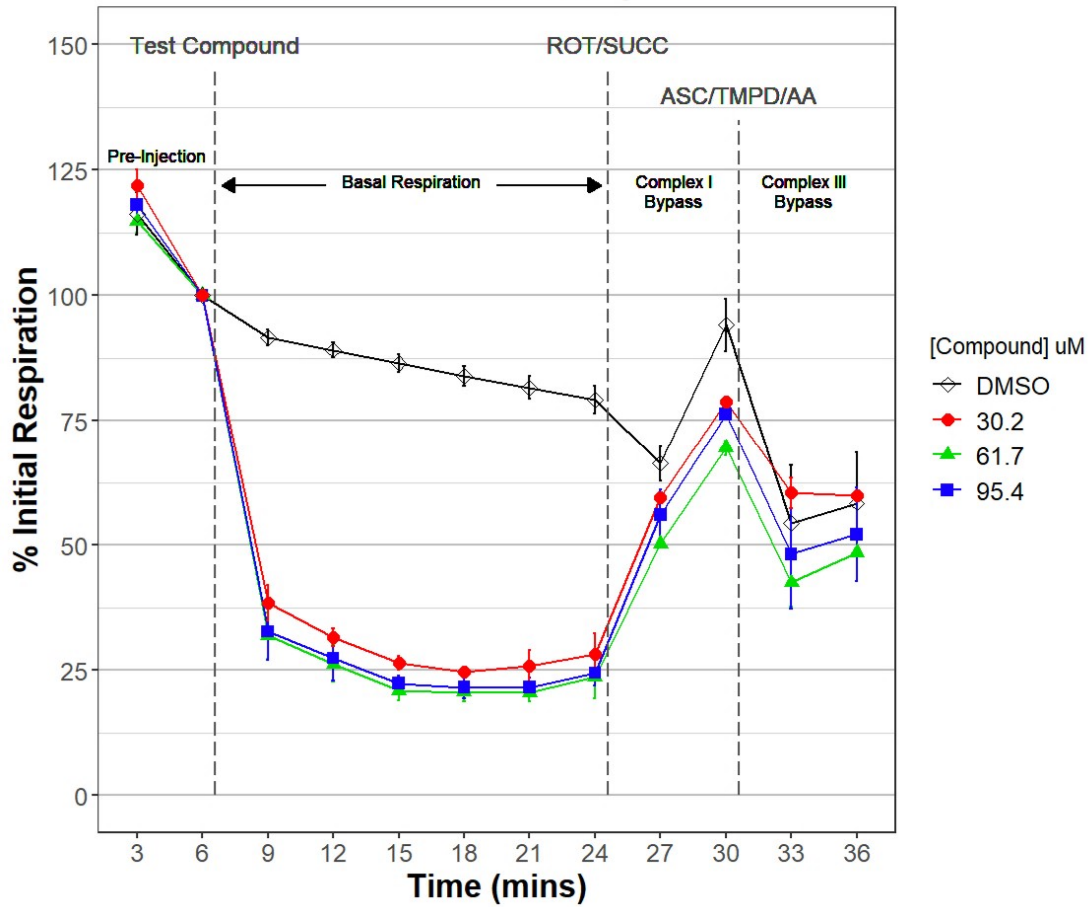

### 3-Iodo-2-propynyl-N-butylcarbamate

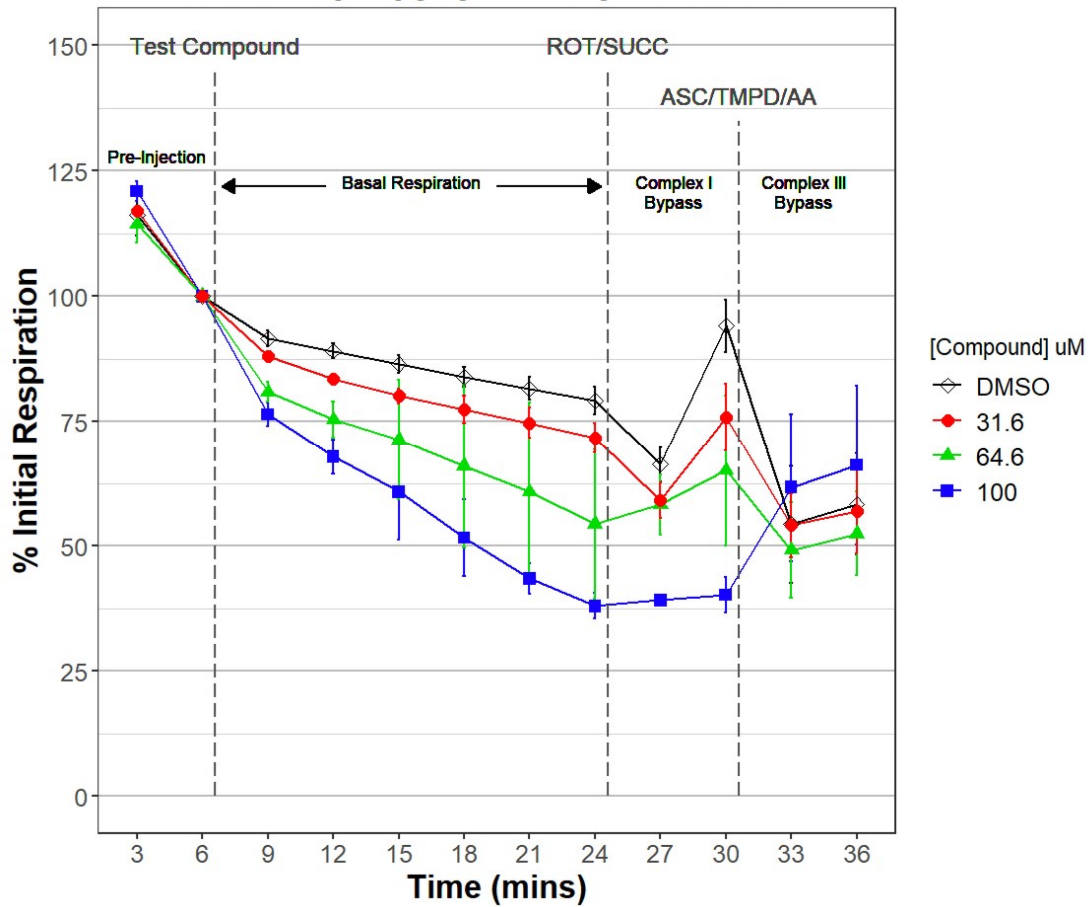

### 4,4'-Sulfonylbis[2-(prop-2-en-1-yl)phenol]

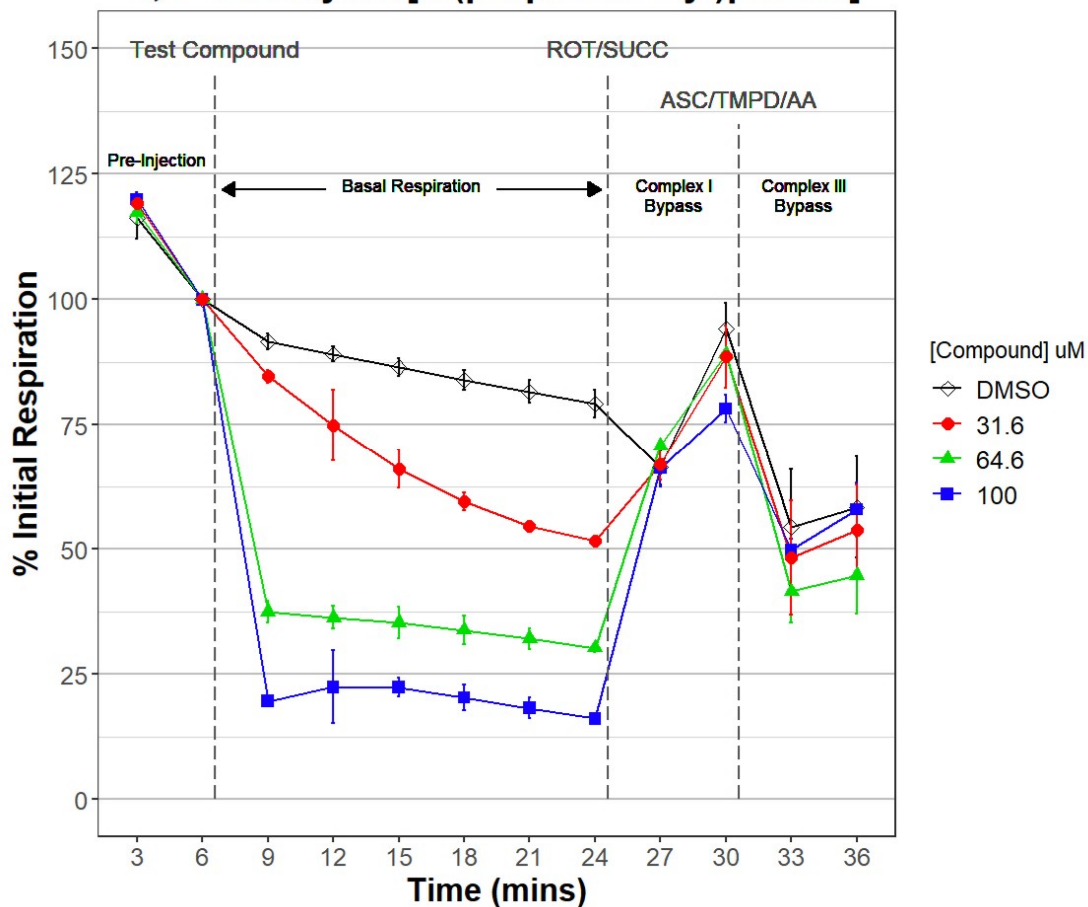

### 4-(1,1,3,3-Tetramethylbutyl)phenol

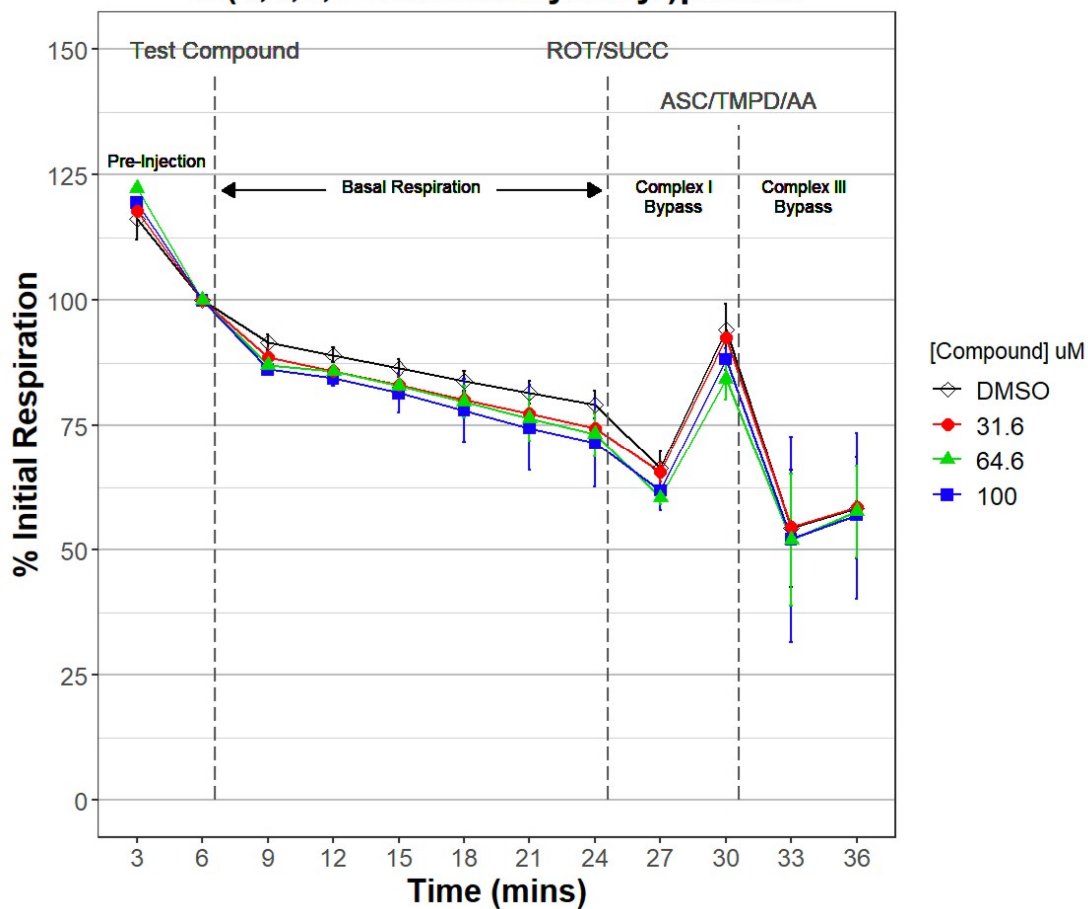

### 4-(2-Methylbutan-2-yl)phenol

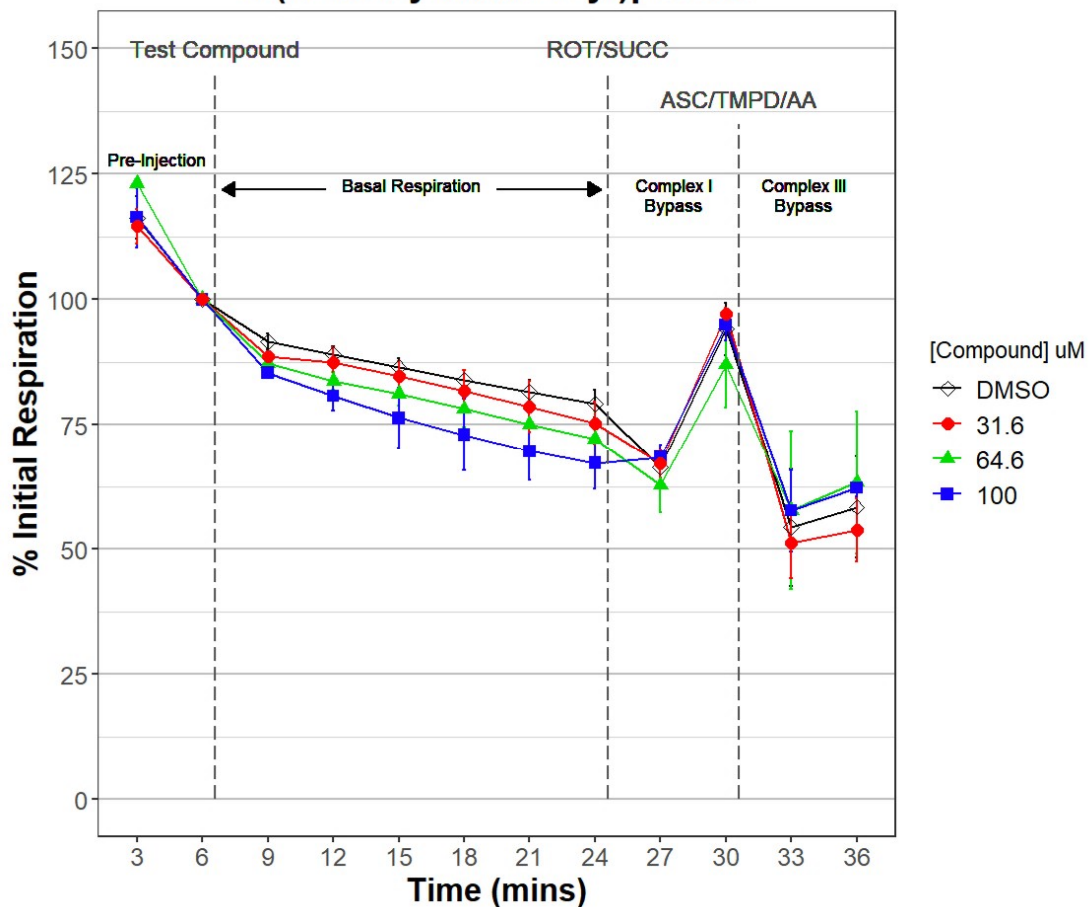

### 4-Androstene-3,17-dione

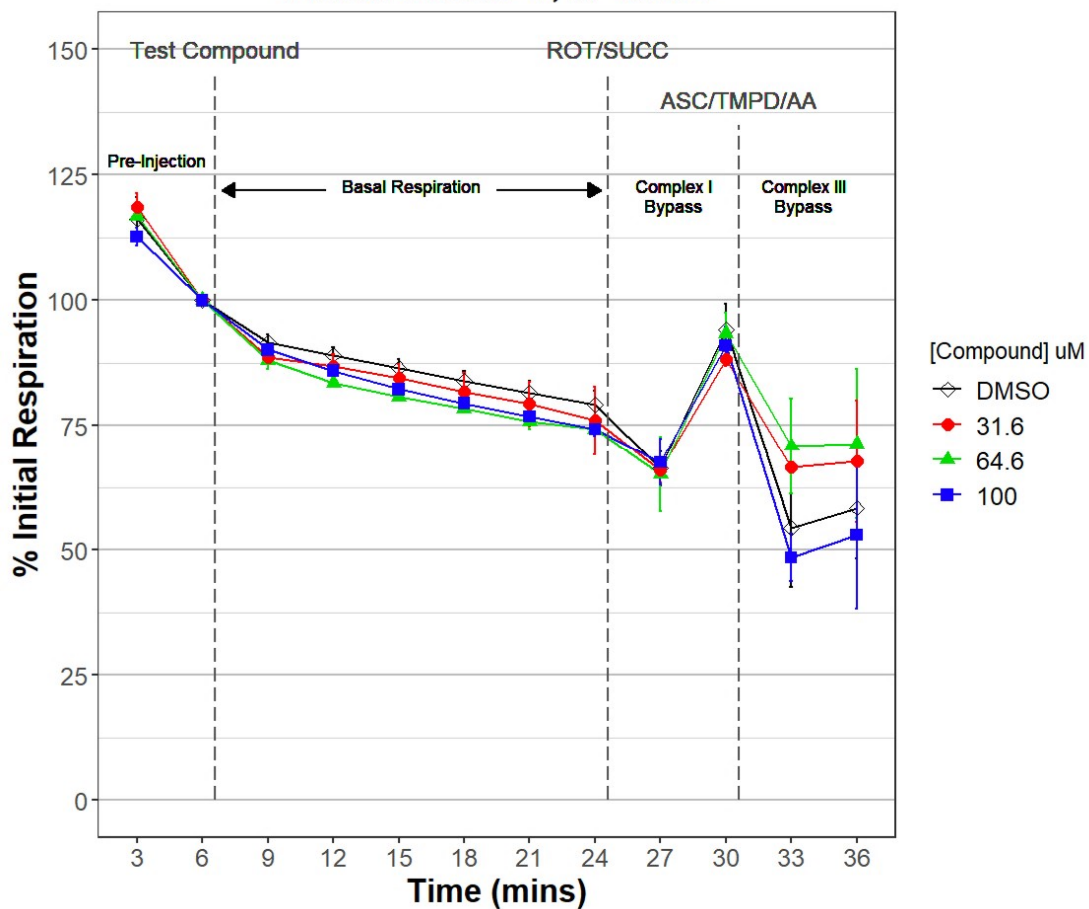



## 4-Cumylphenol

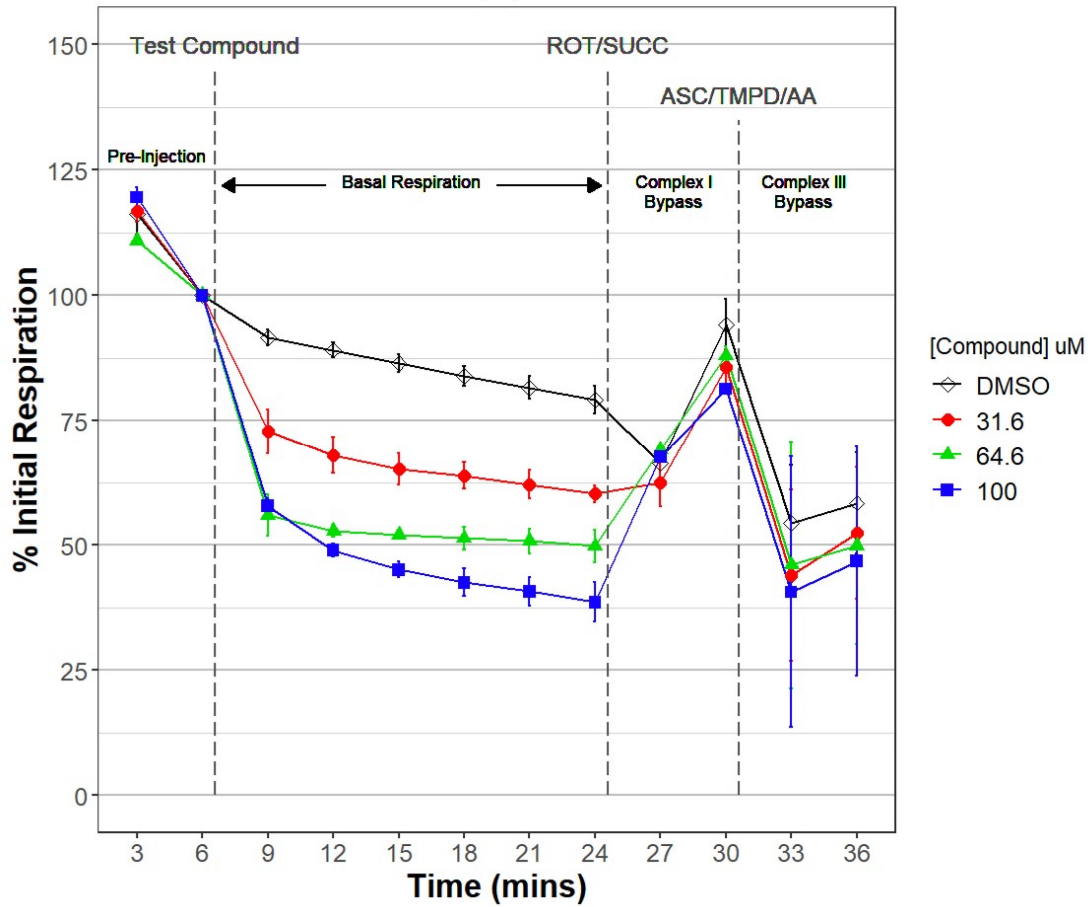

## 4-Cyclohexylcyclohexanol

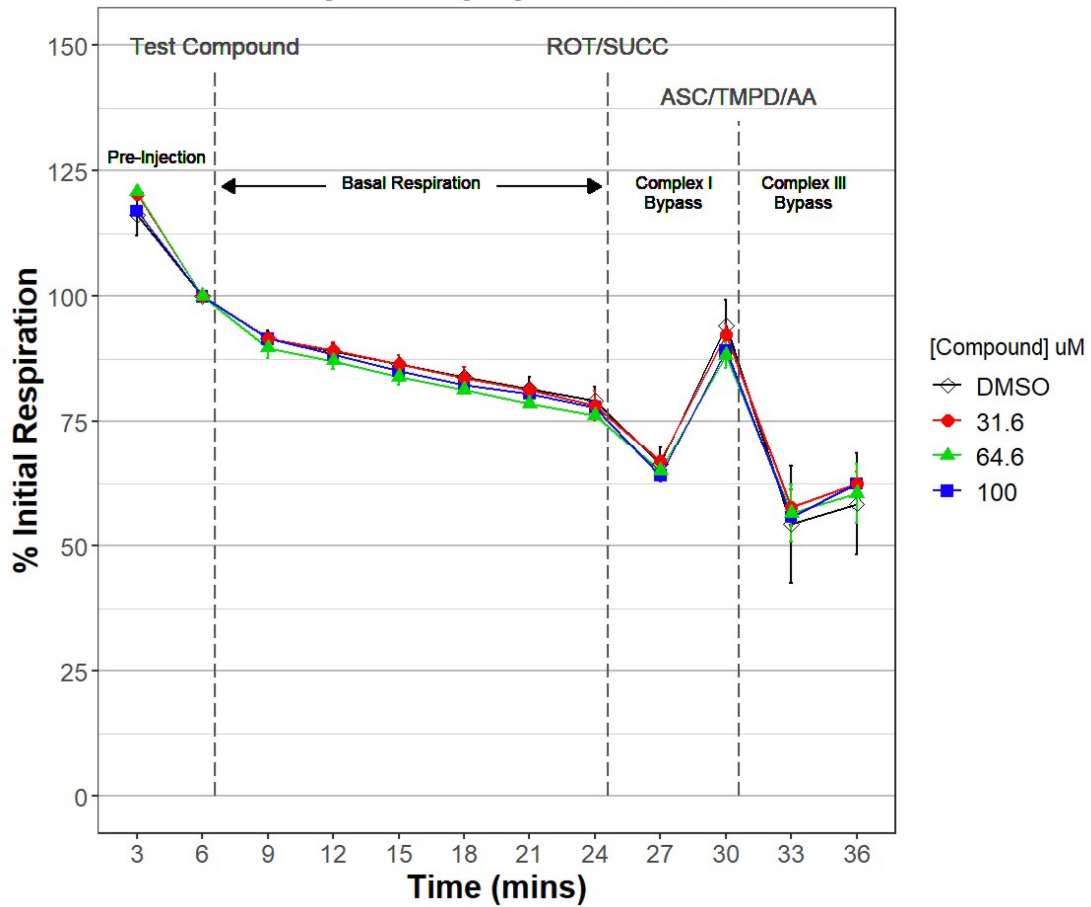



## 4-Cyclohexylcyclohexanone

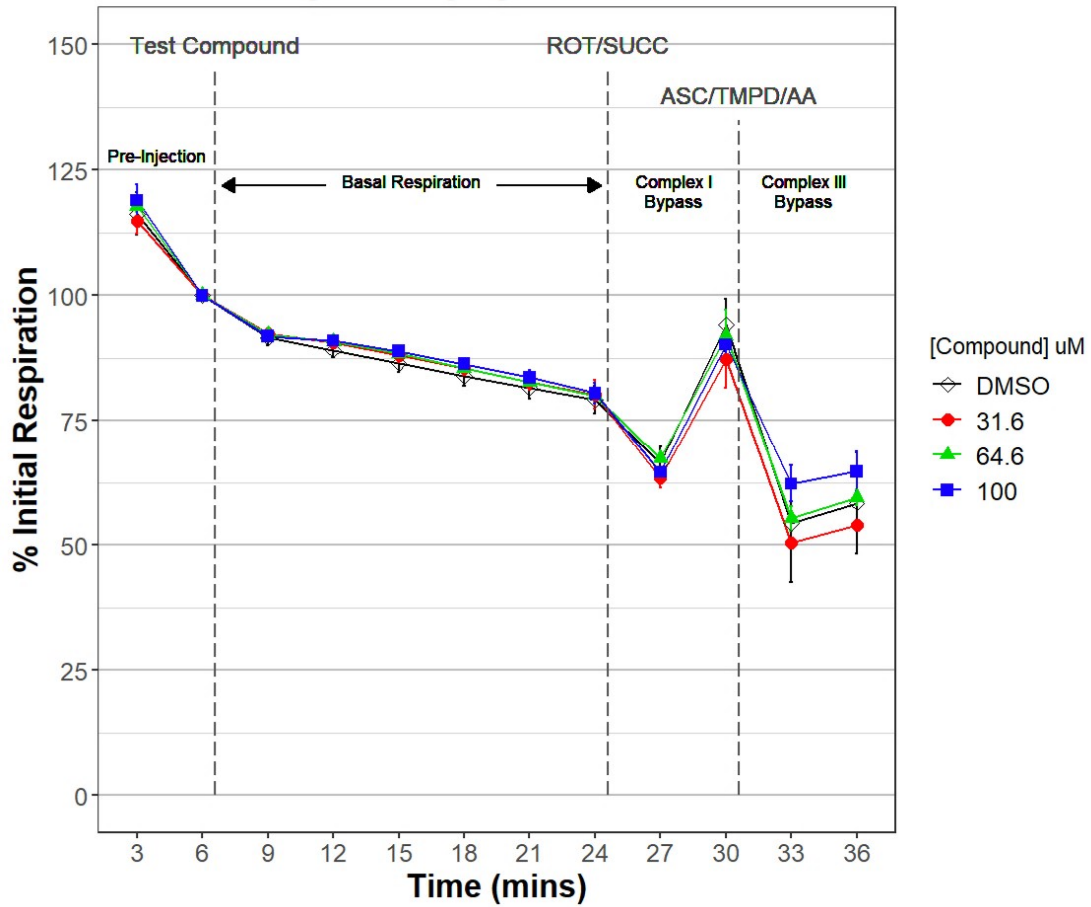

## 4-Heptylphenol

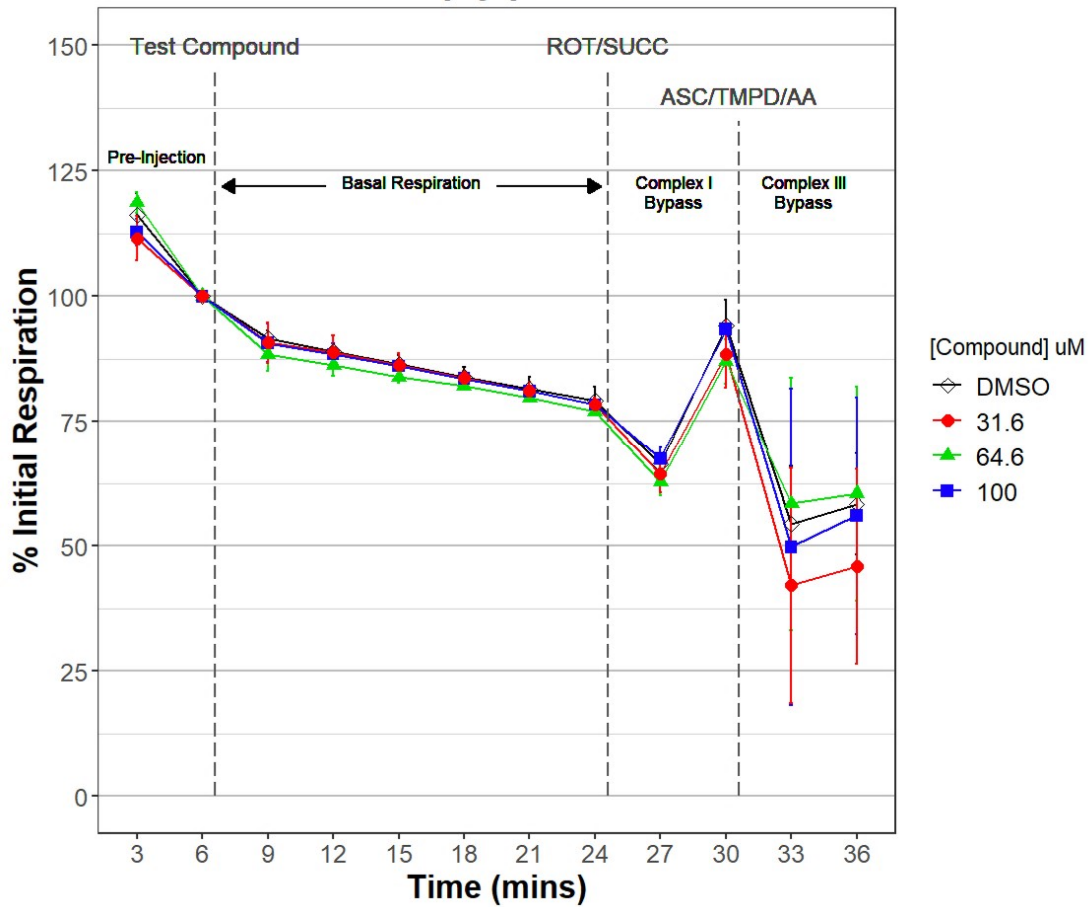

## 4-Hexylresorcinol

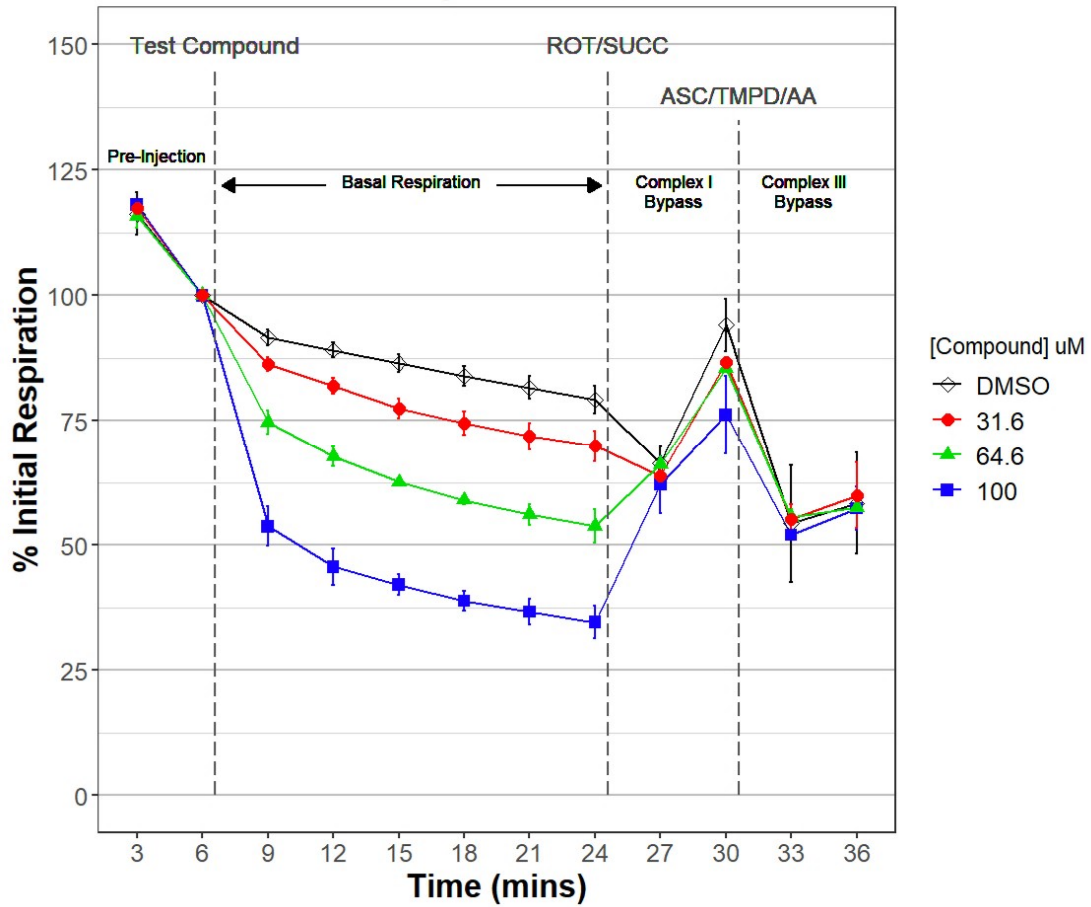

## 4-Nonylphenol, branched

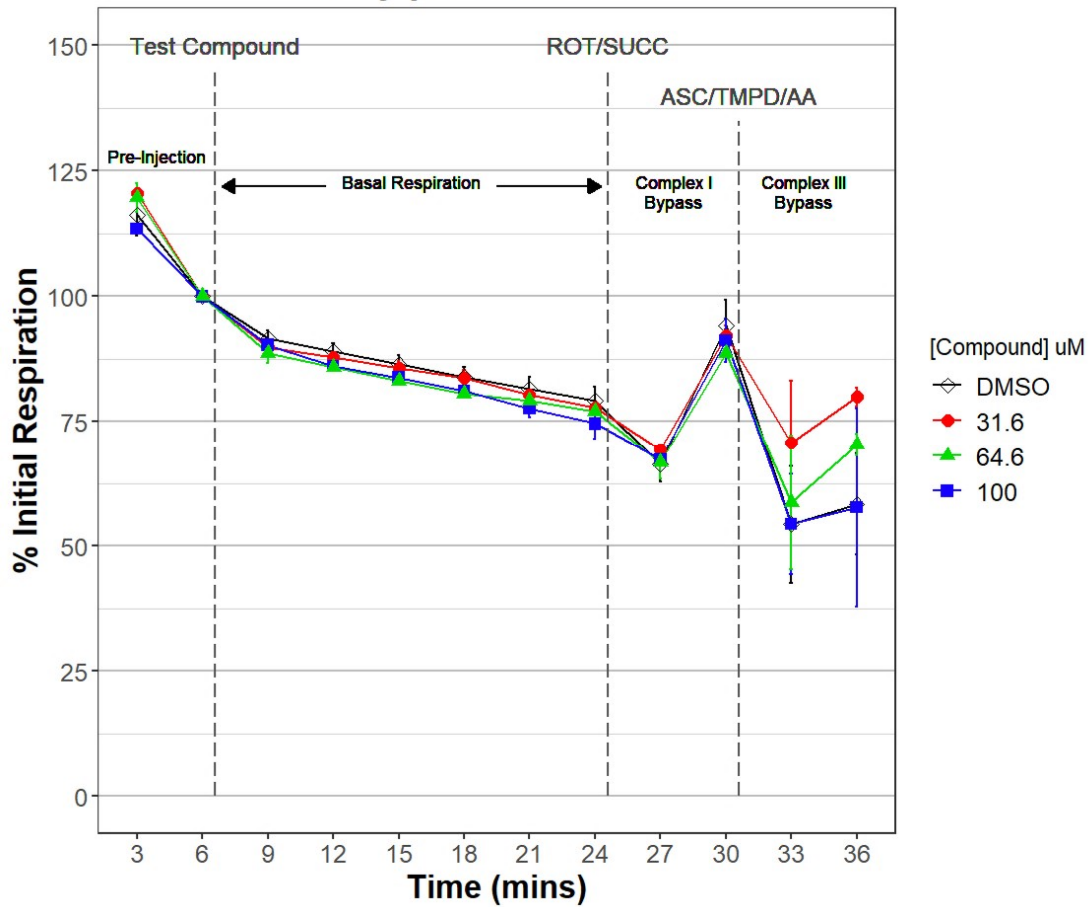

## 4-Octylphenol

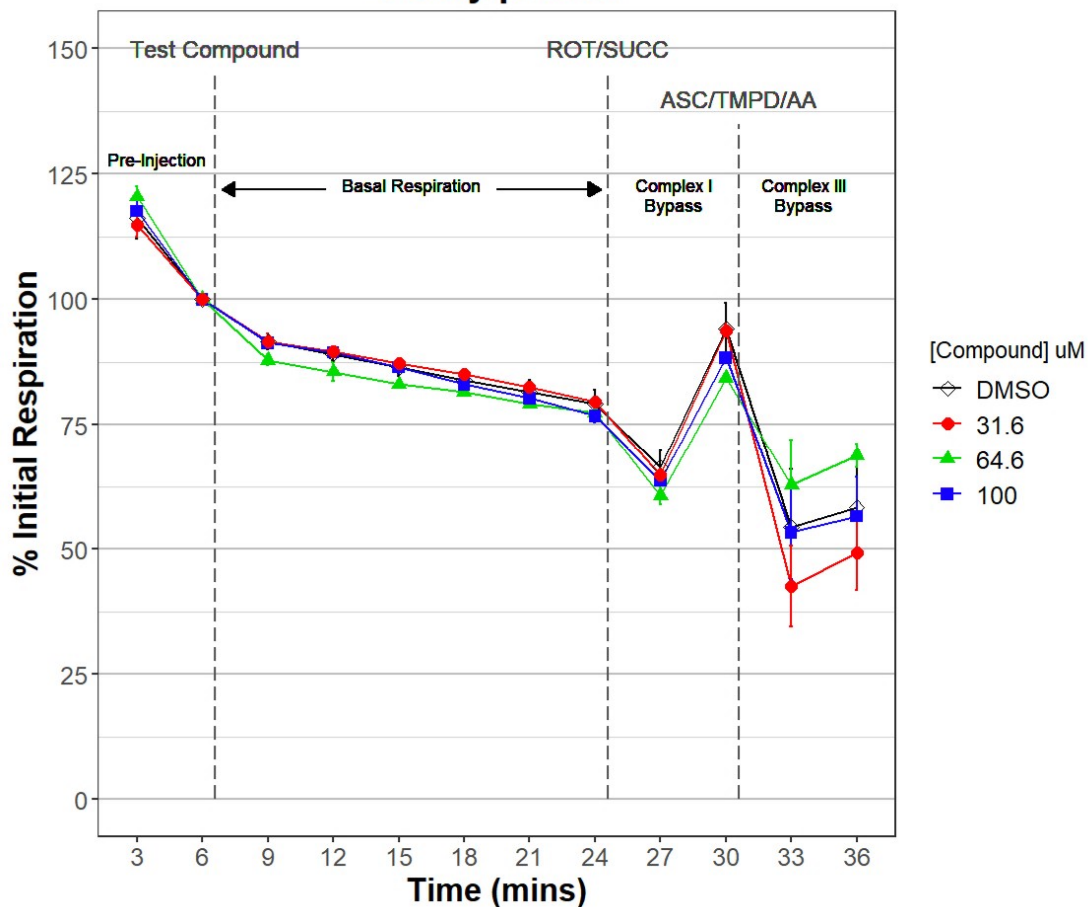

## 7,12-Dimethylbenz(a)anthracene

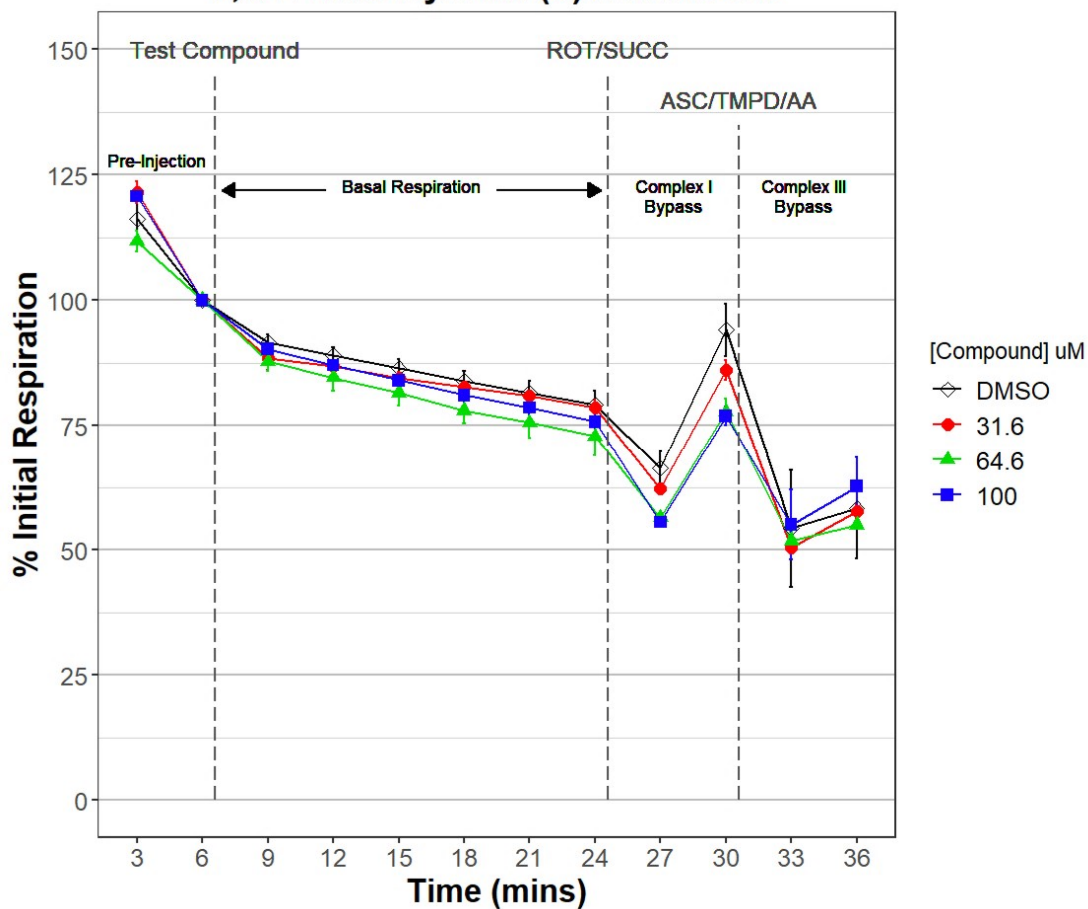

# AVE5638

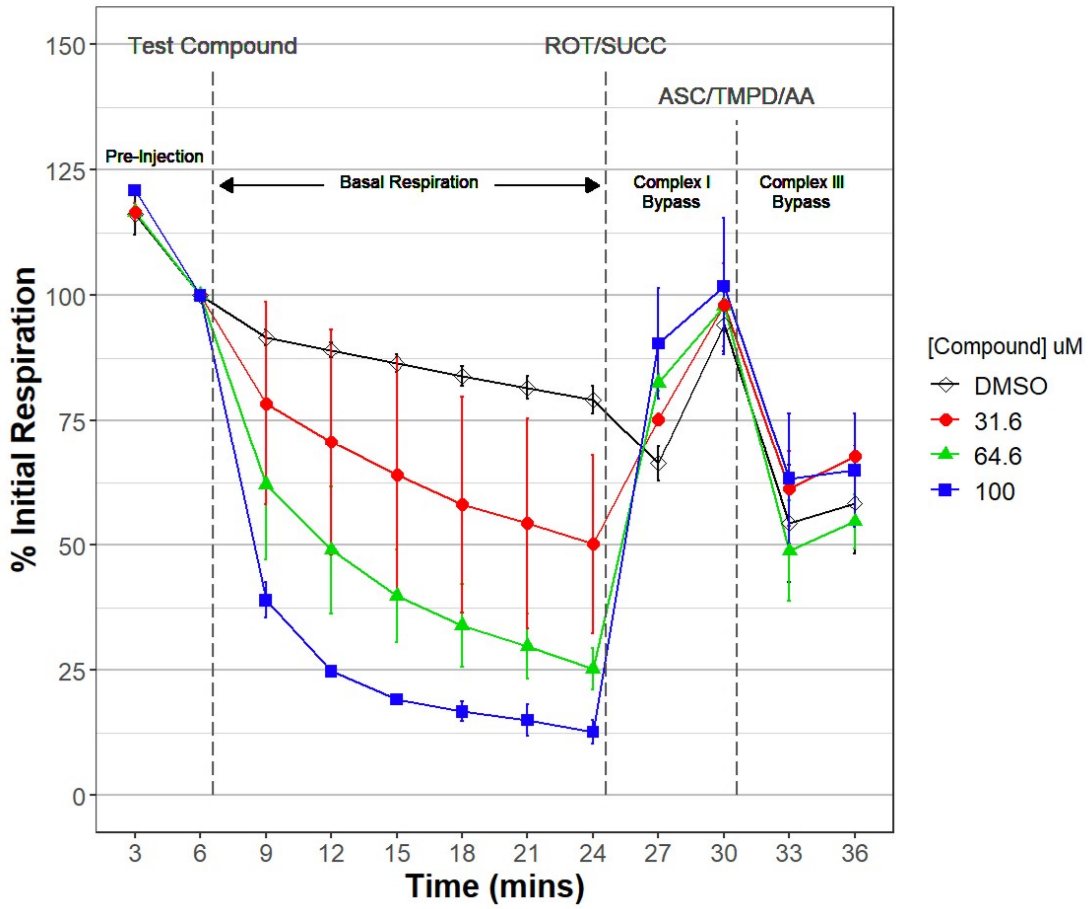

# Abamectin

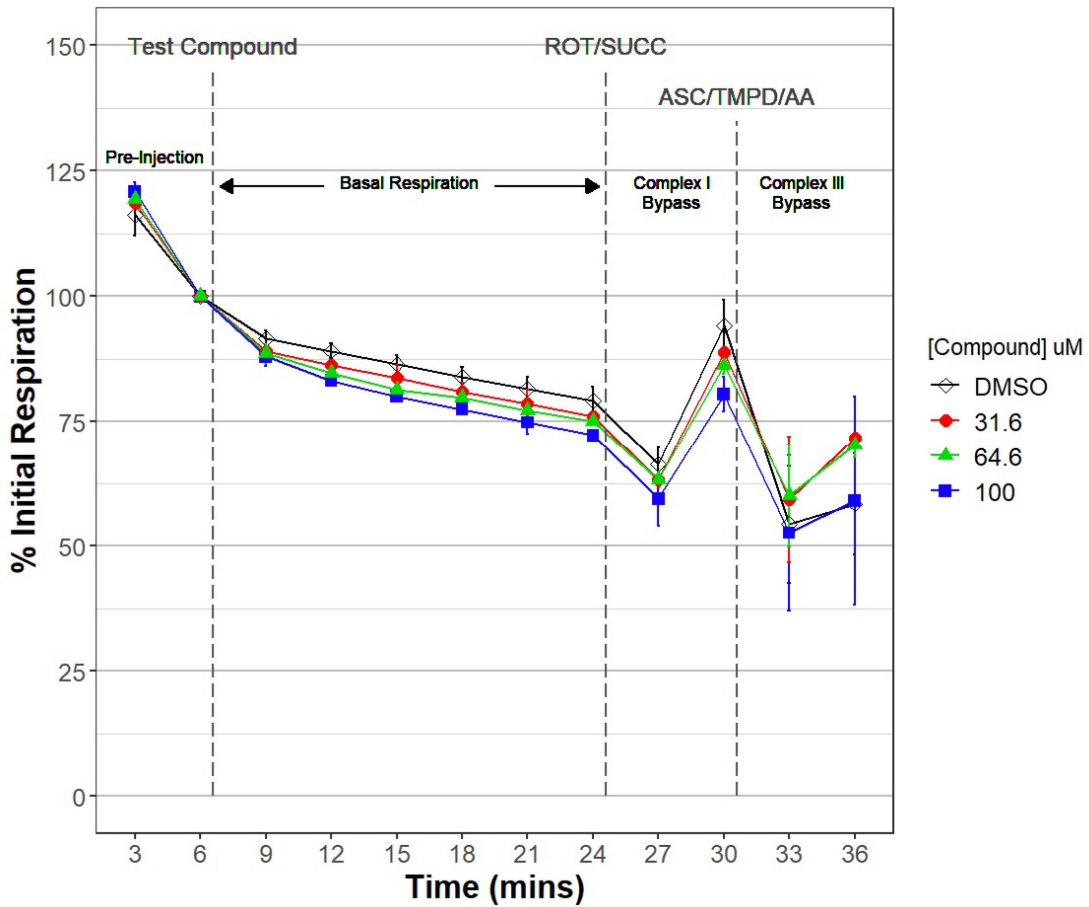

## Alachlor

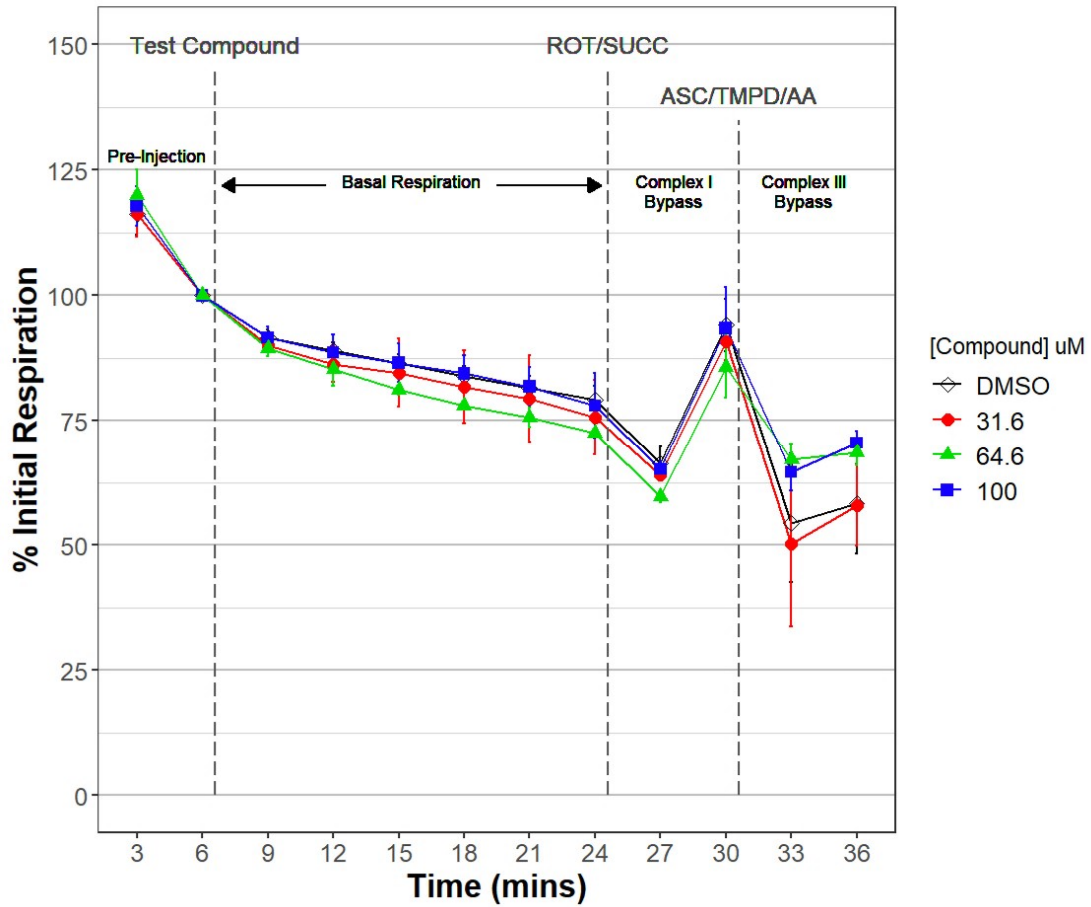

## Allethrin

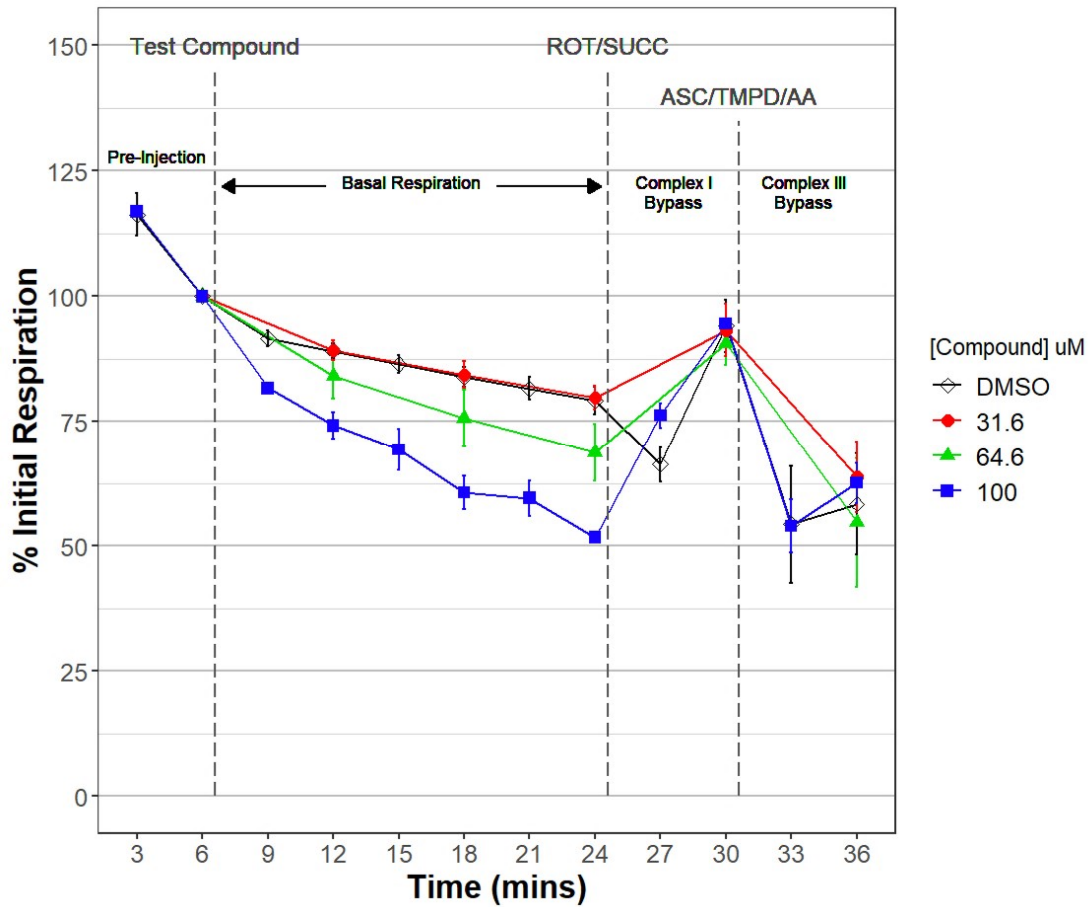



## Azoxystrobin

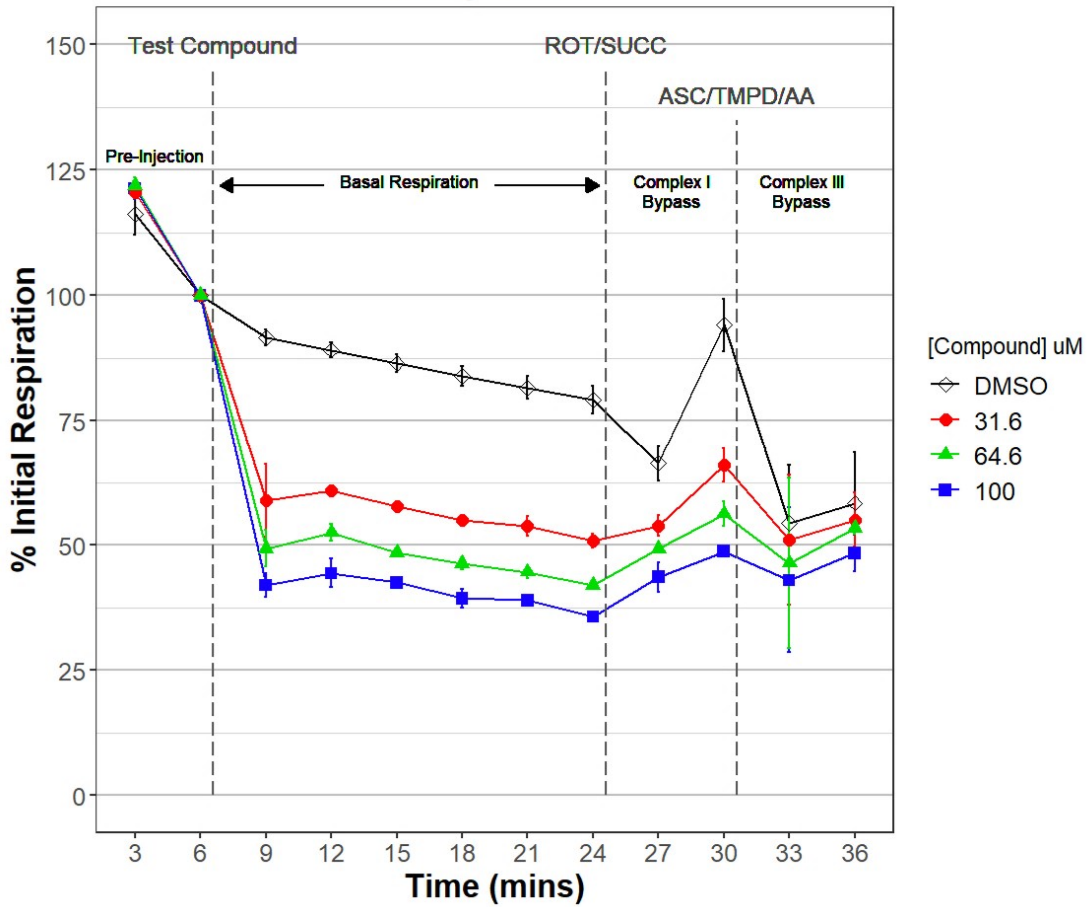

## Besonprodil

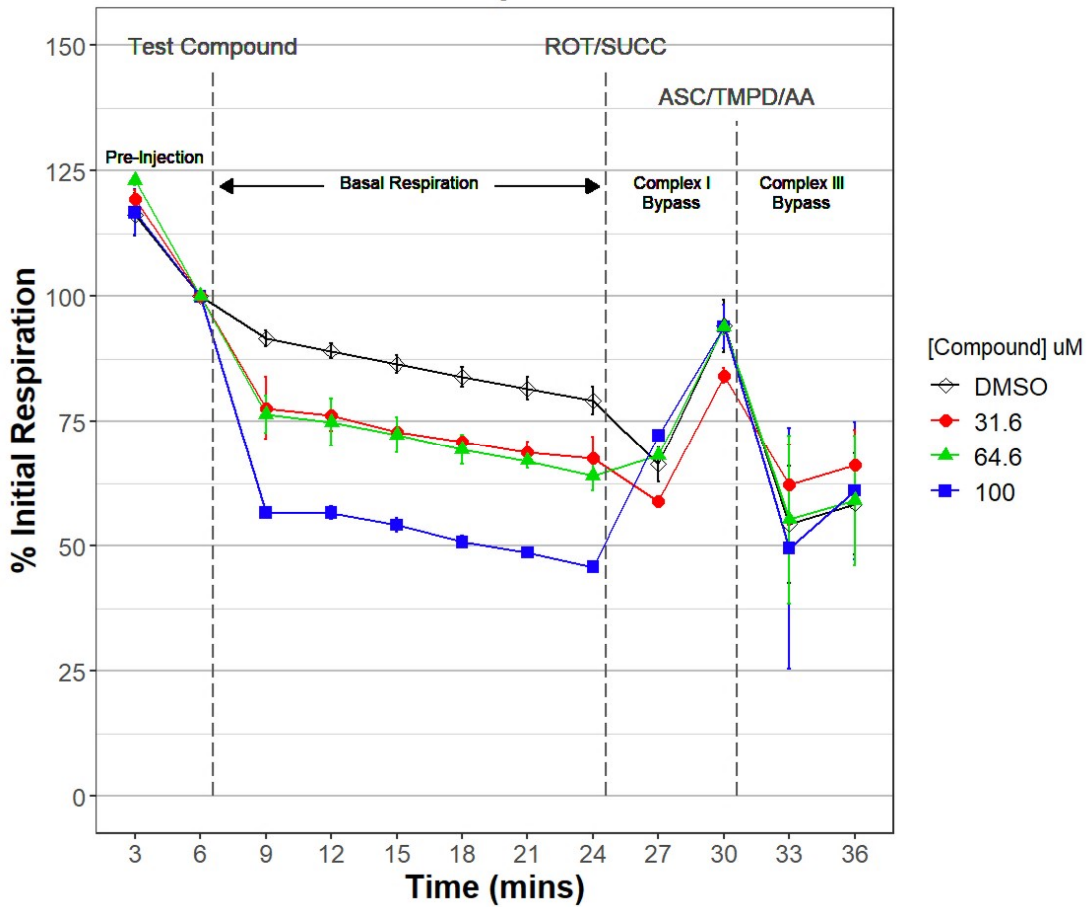



## Bisphenol A

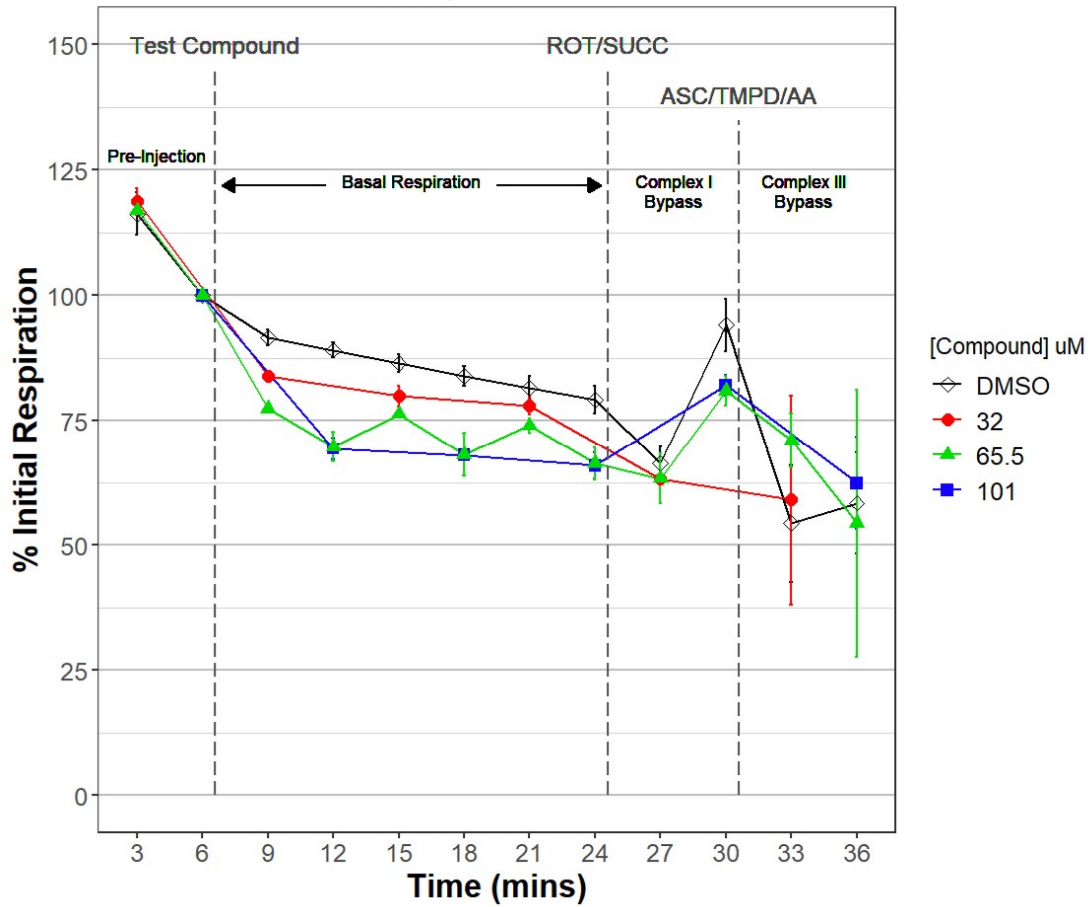

## Bisphenol AF

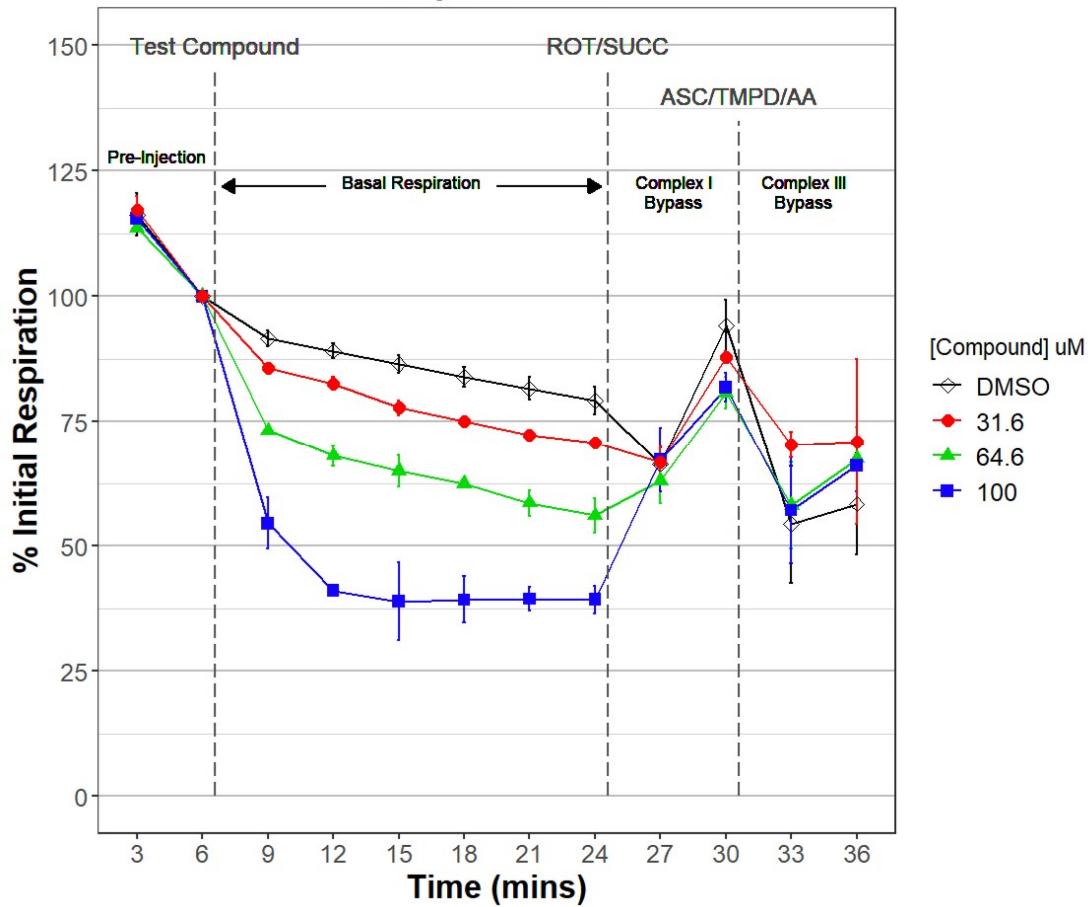

## Bisphenol B

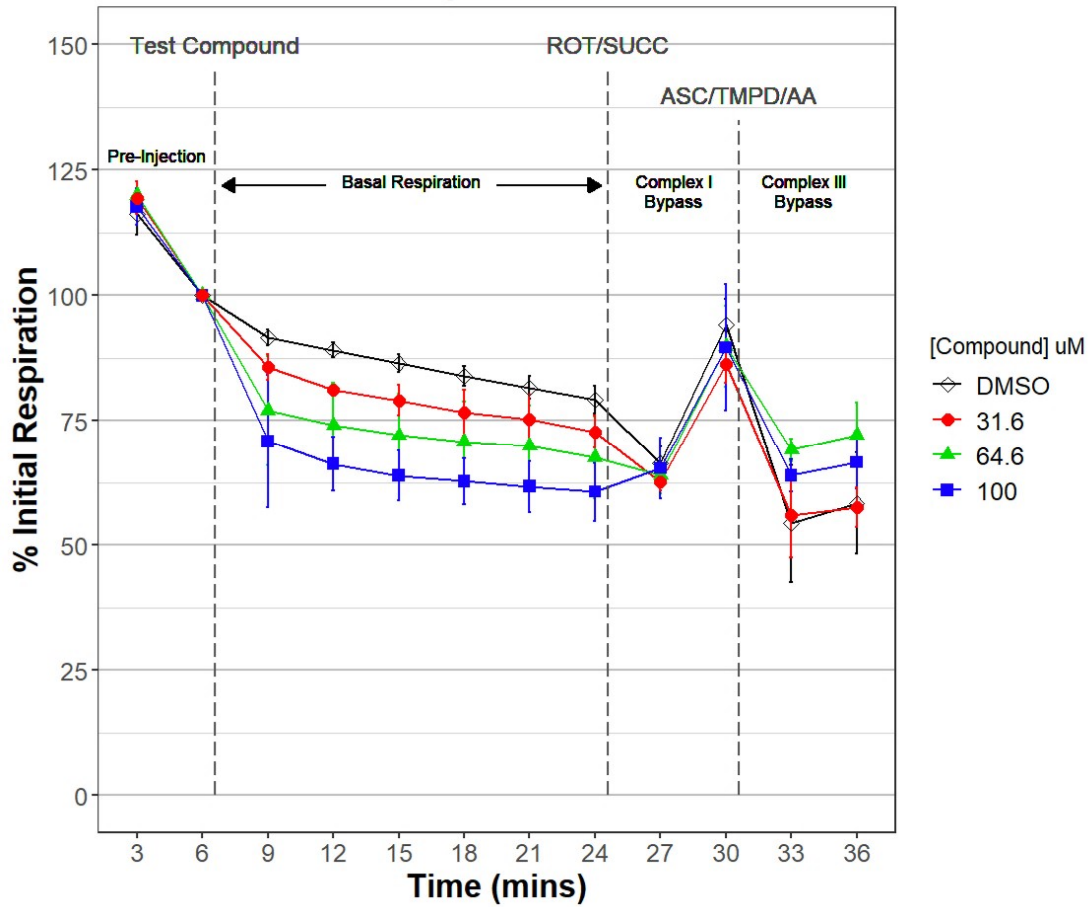

## Butylparaben

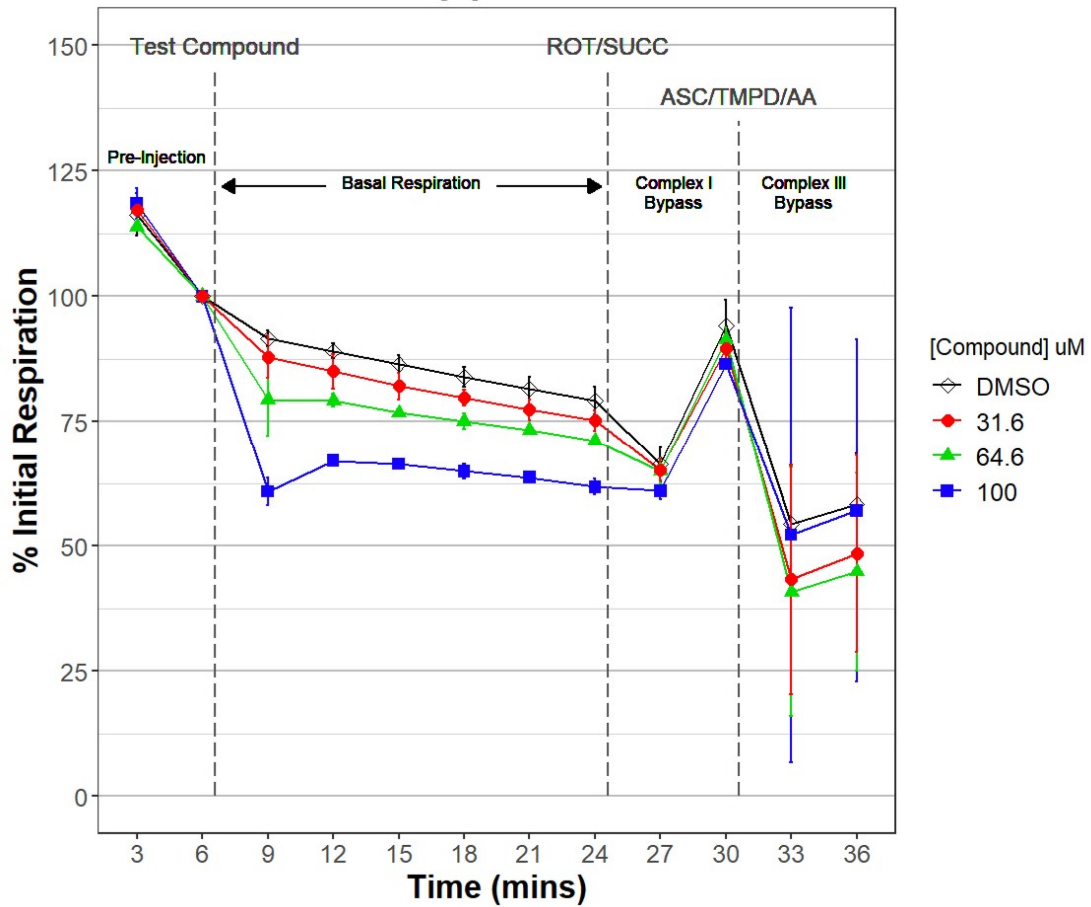

### CJ-013610

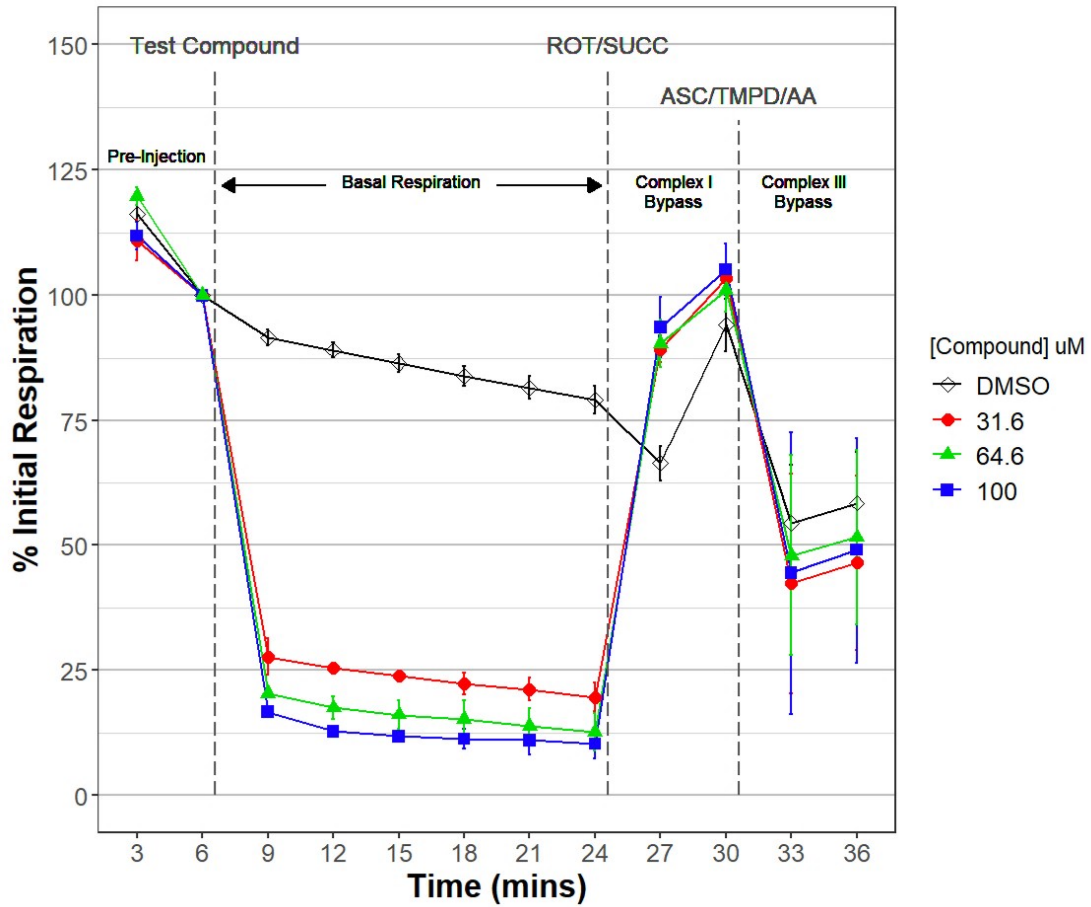

### CJ-013790

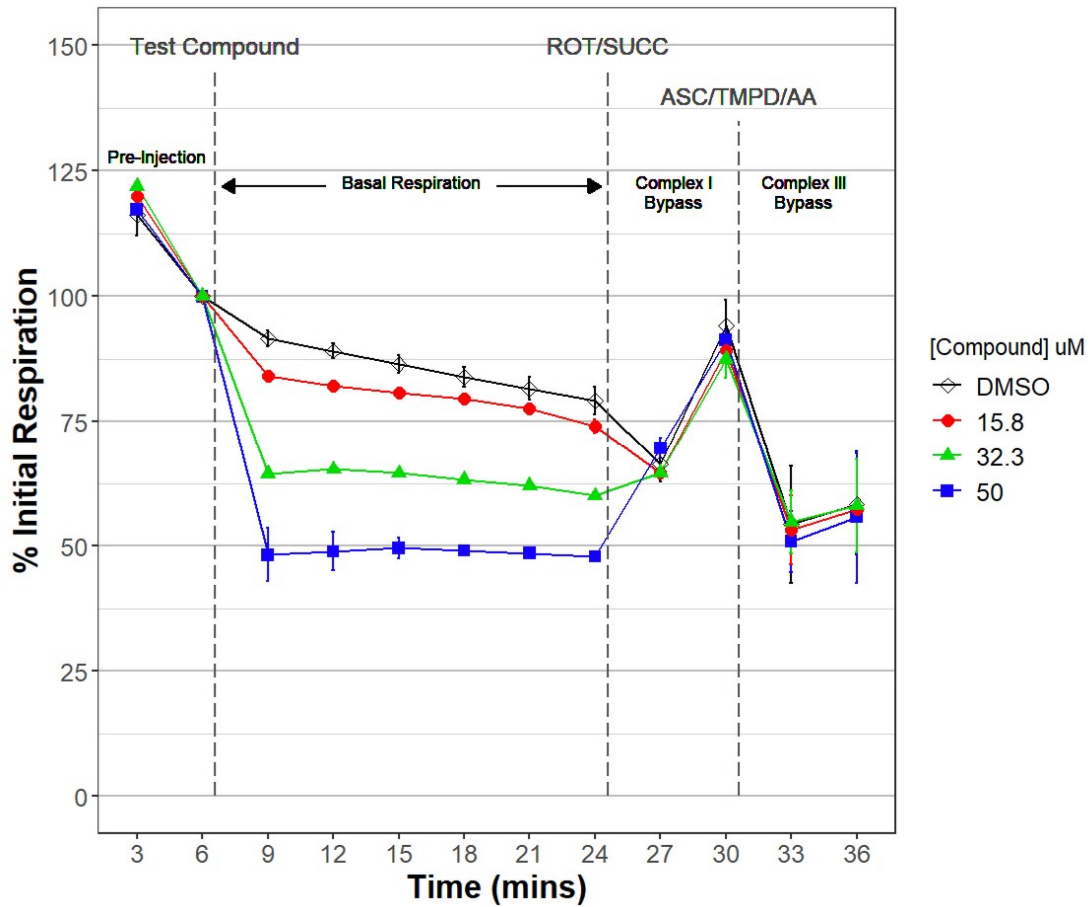

### CP-085958

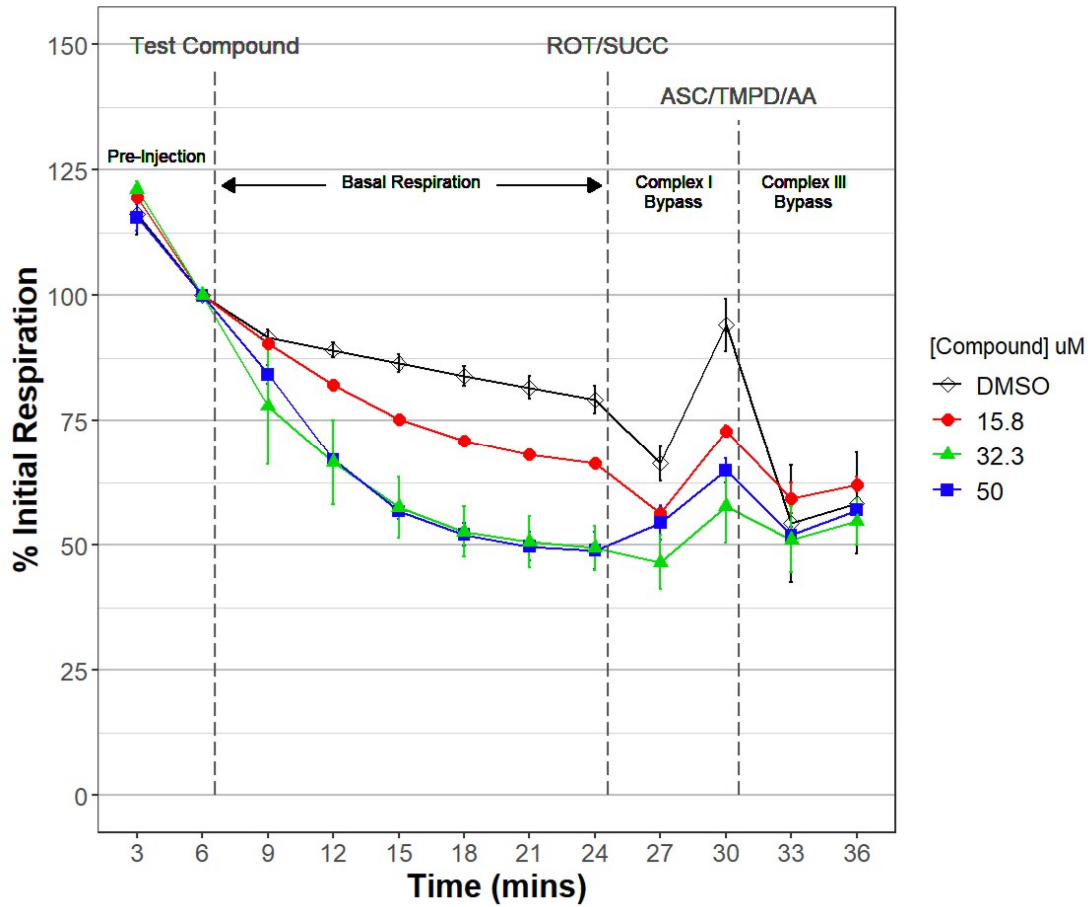

### CP-105696

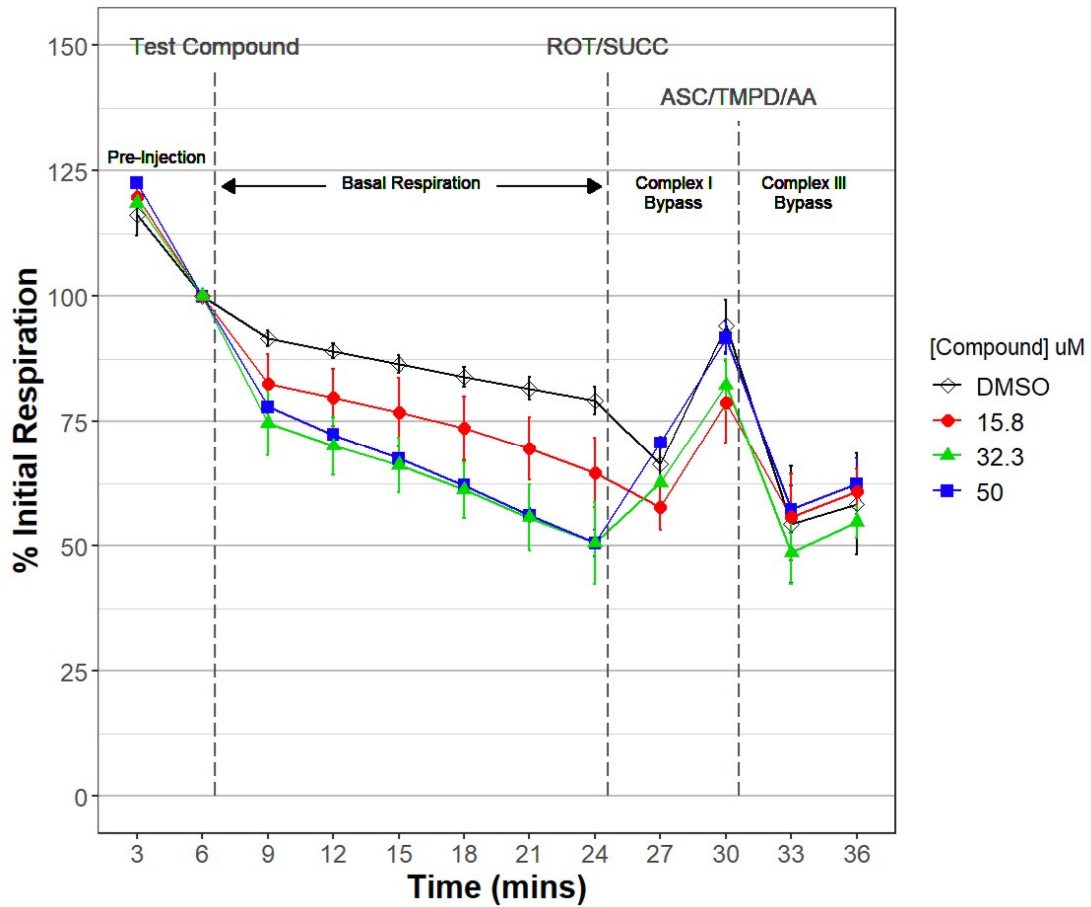

### CP-401387

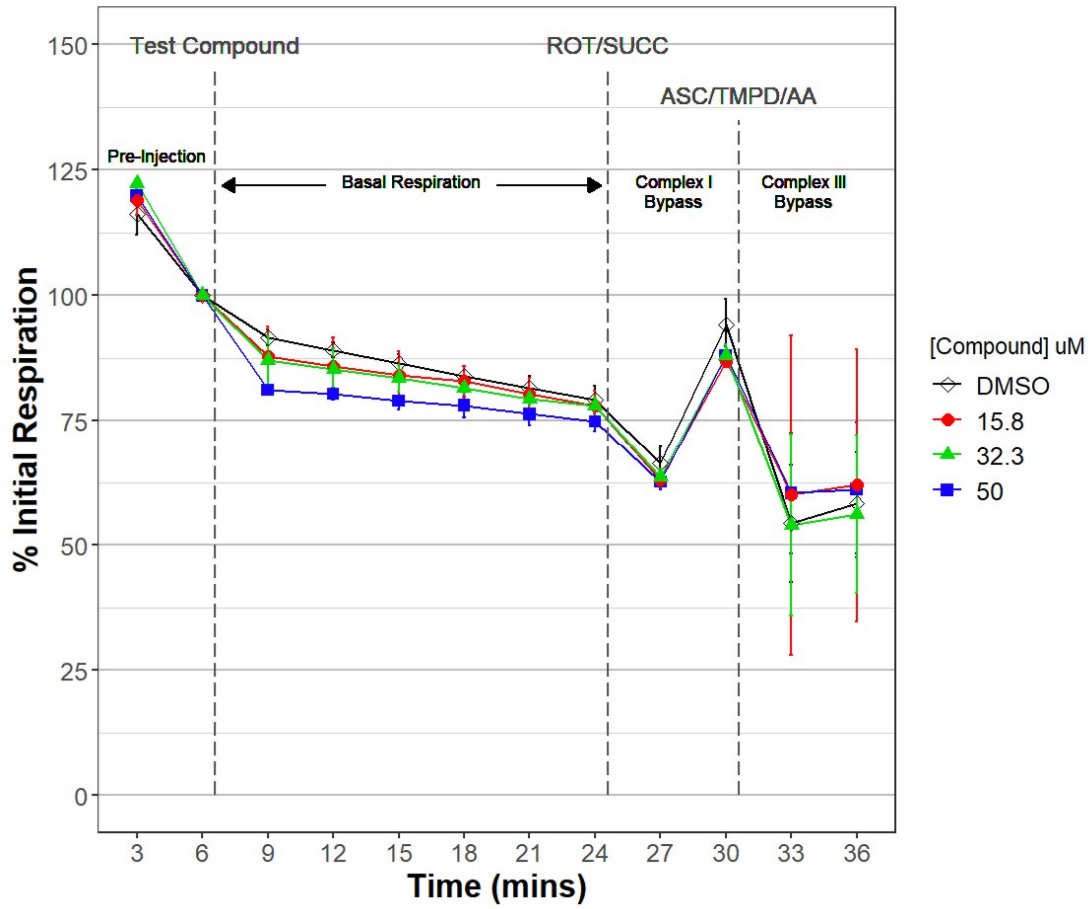

### CP-457677

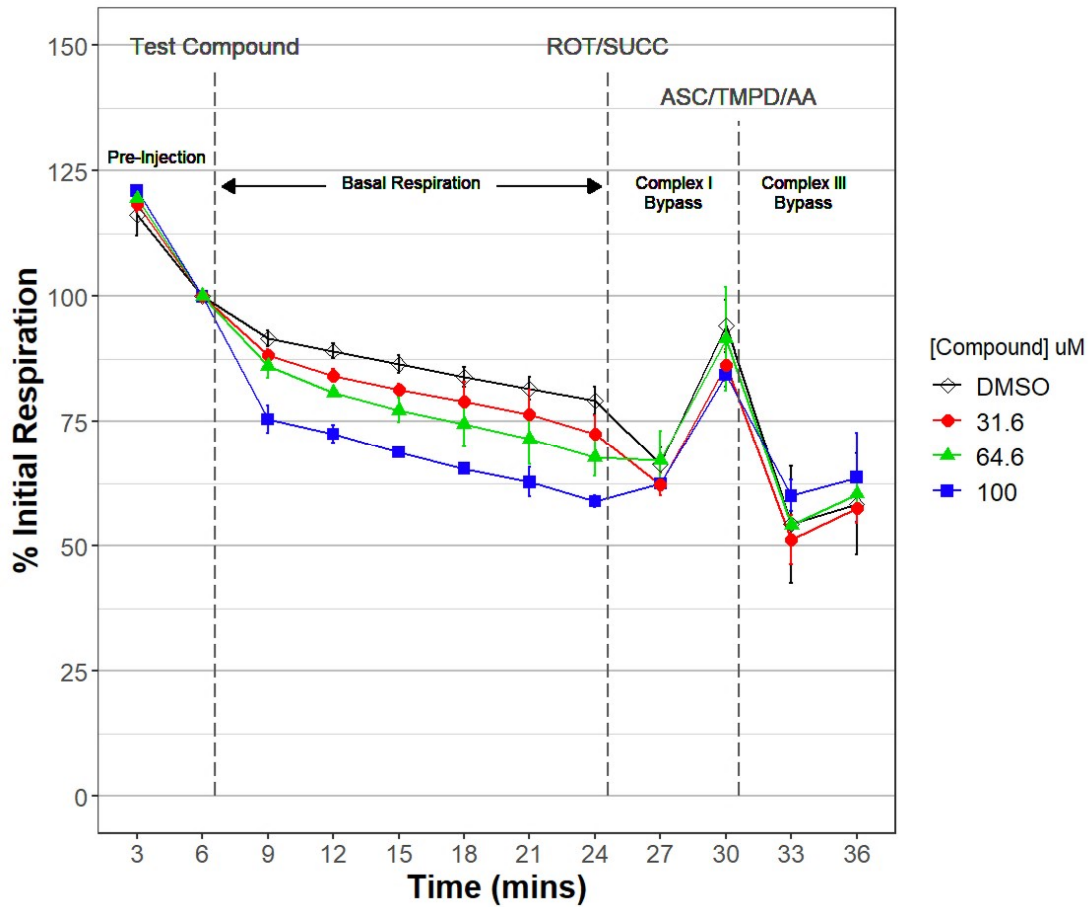



### CP-54439

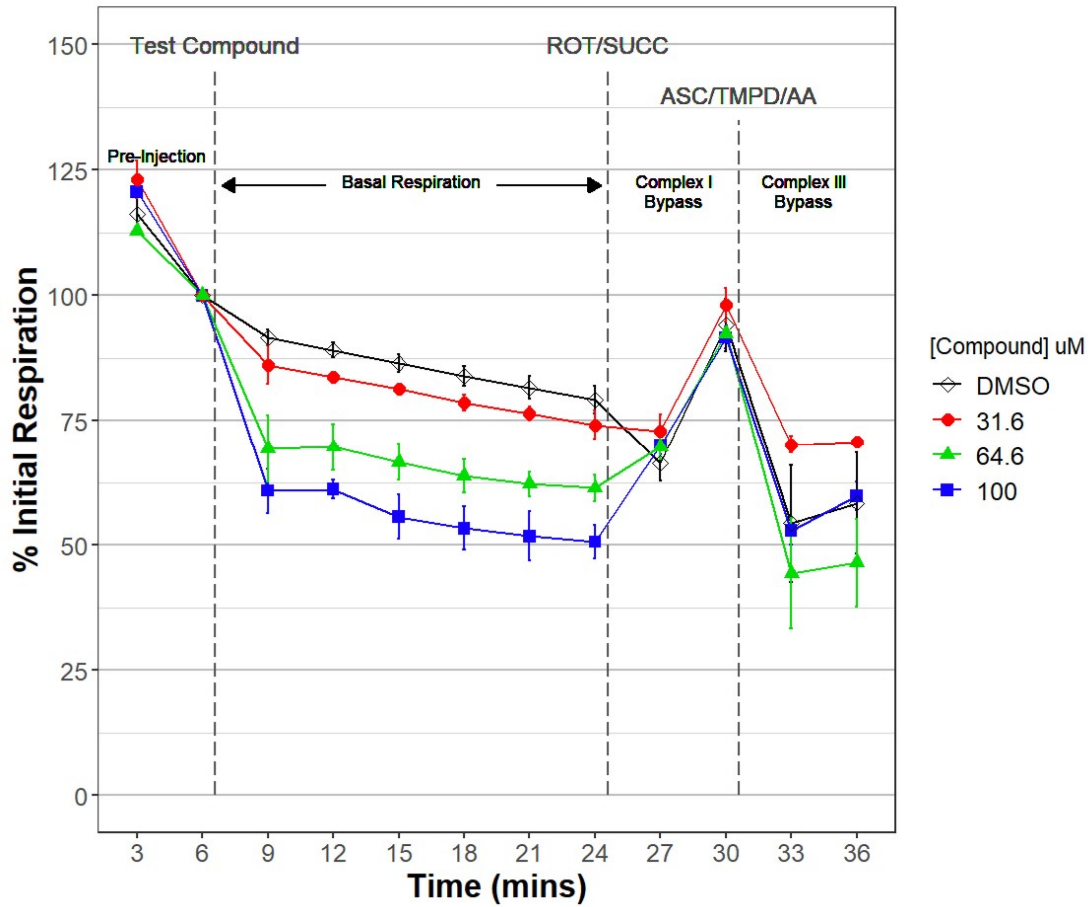

### CP-863187

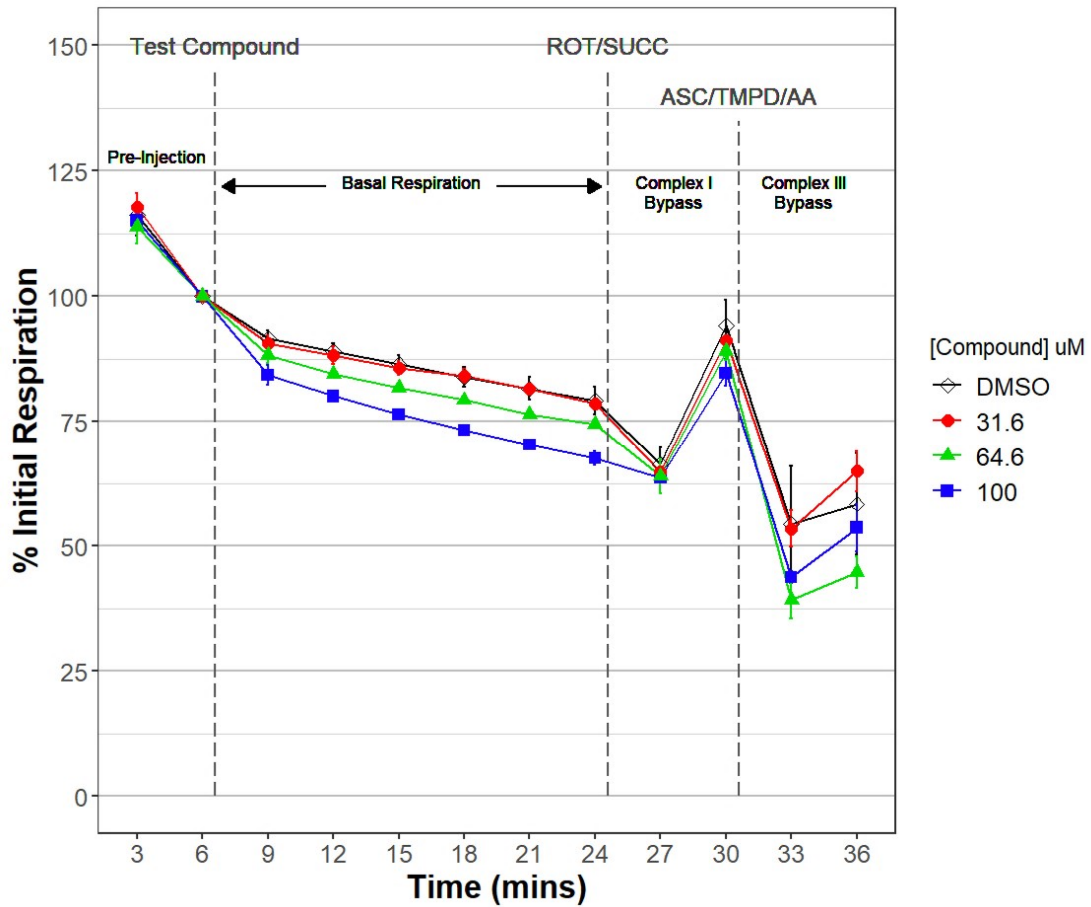



### Captan

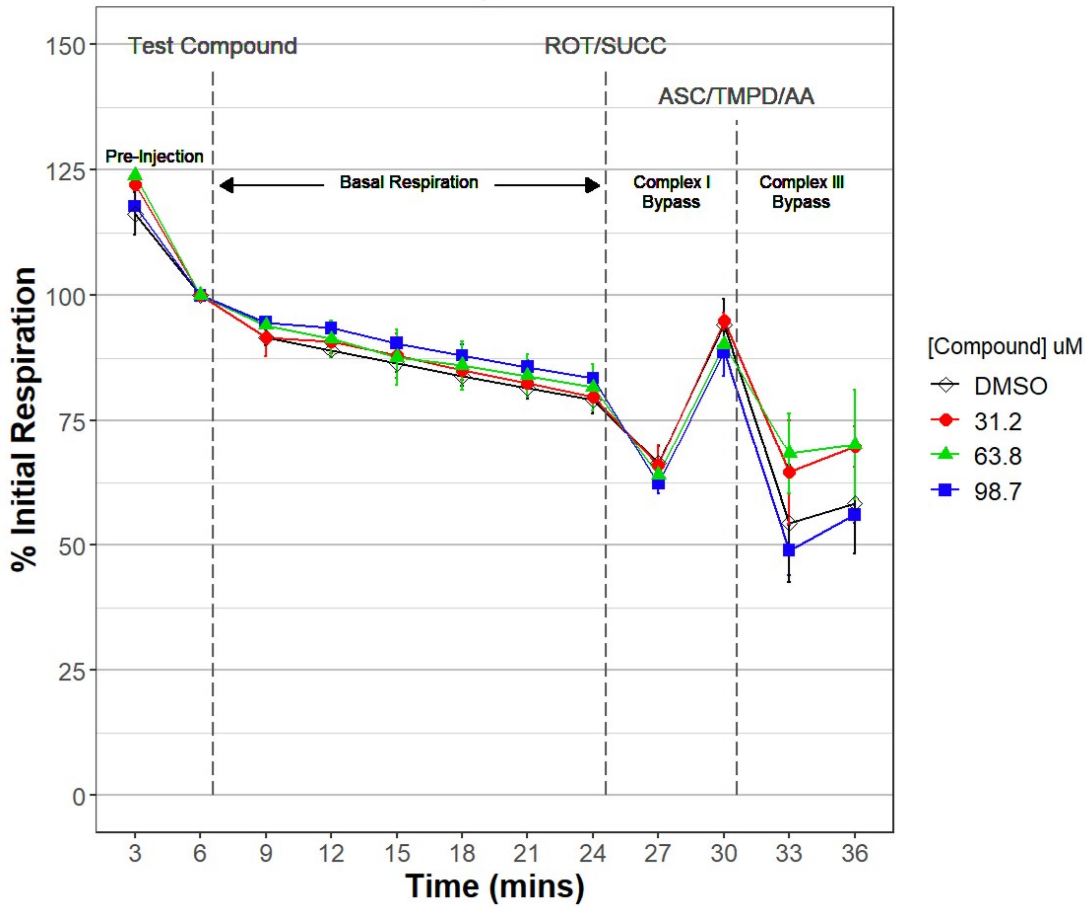

### Carboxin

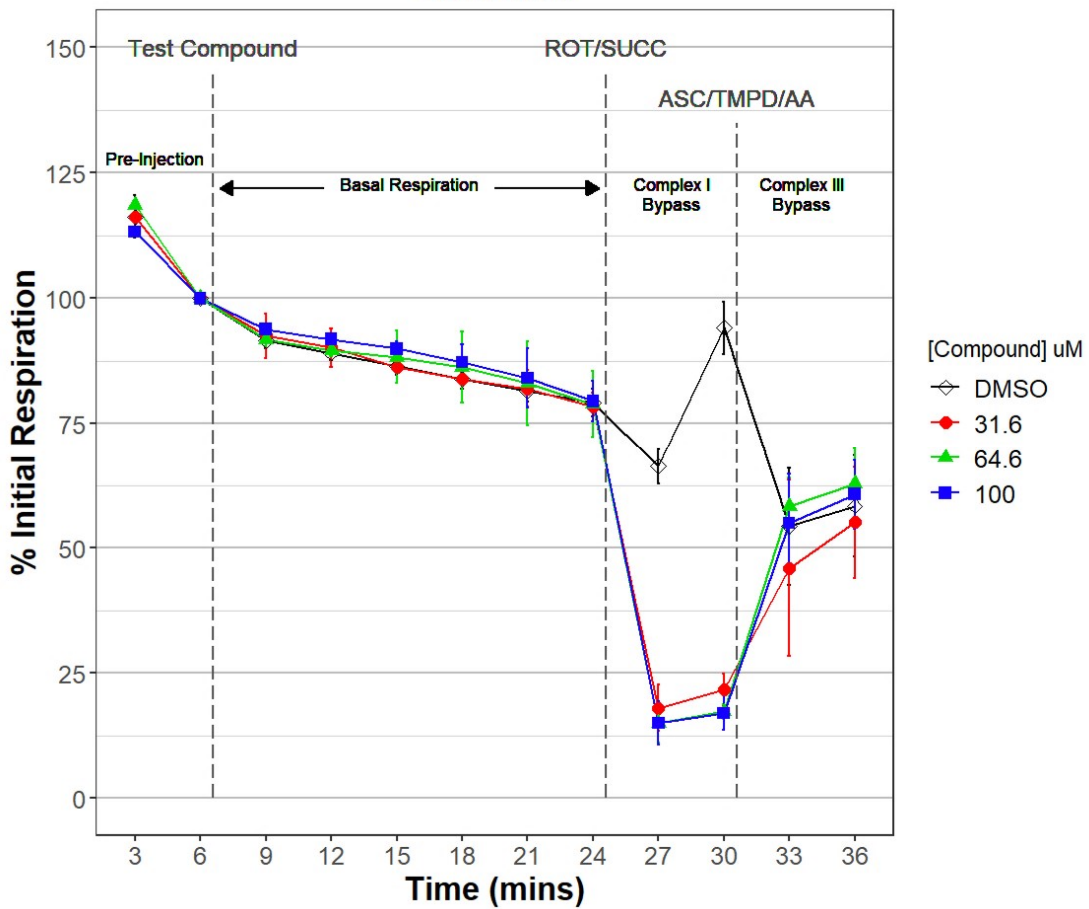

### Chlorpyrifos oxon

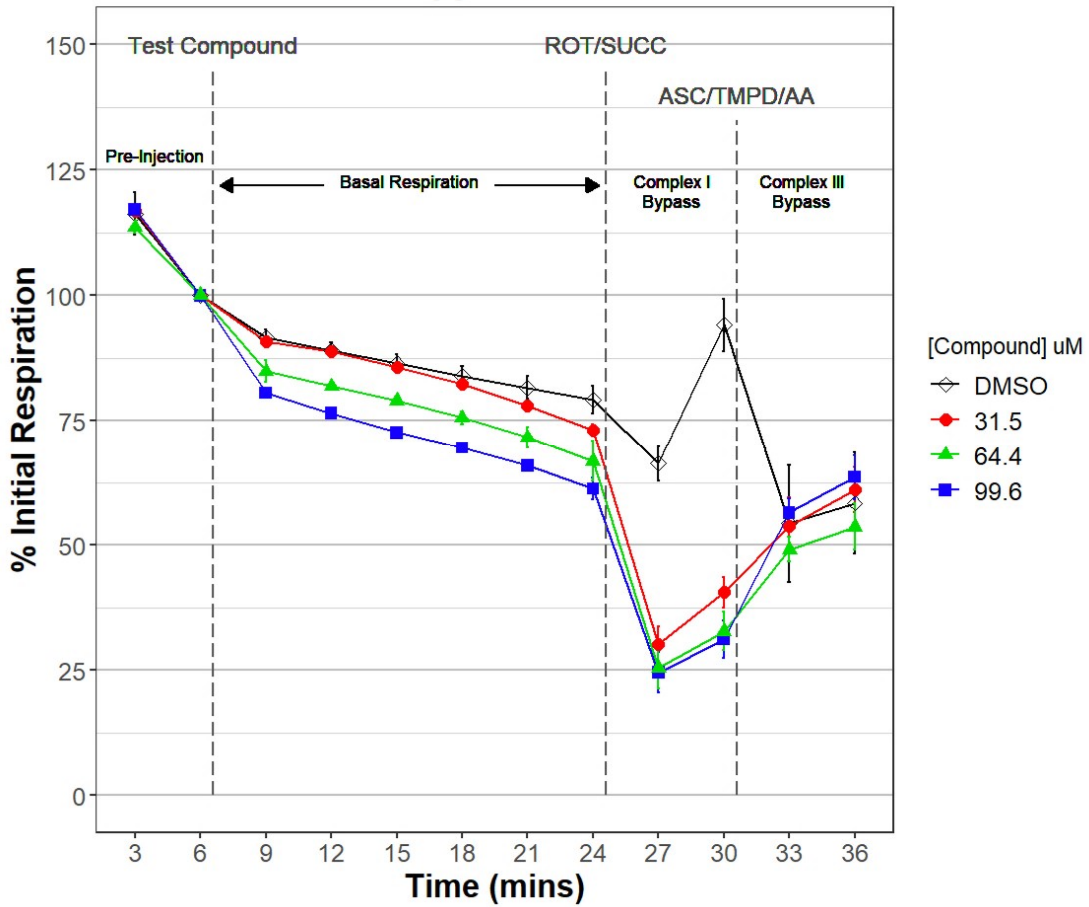

### Chlorpyrifos-methyl

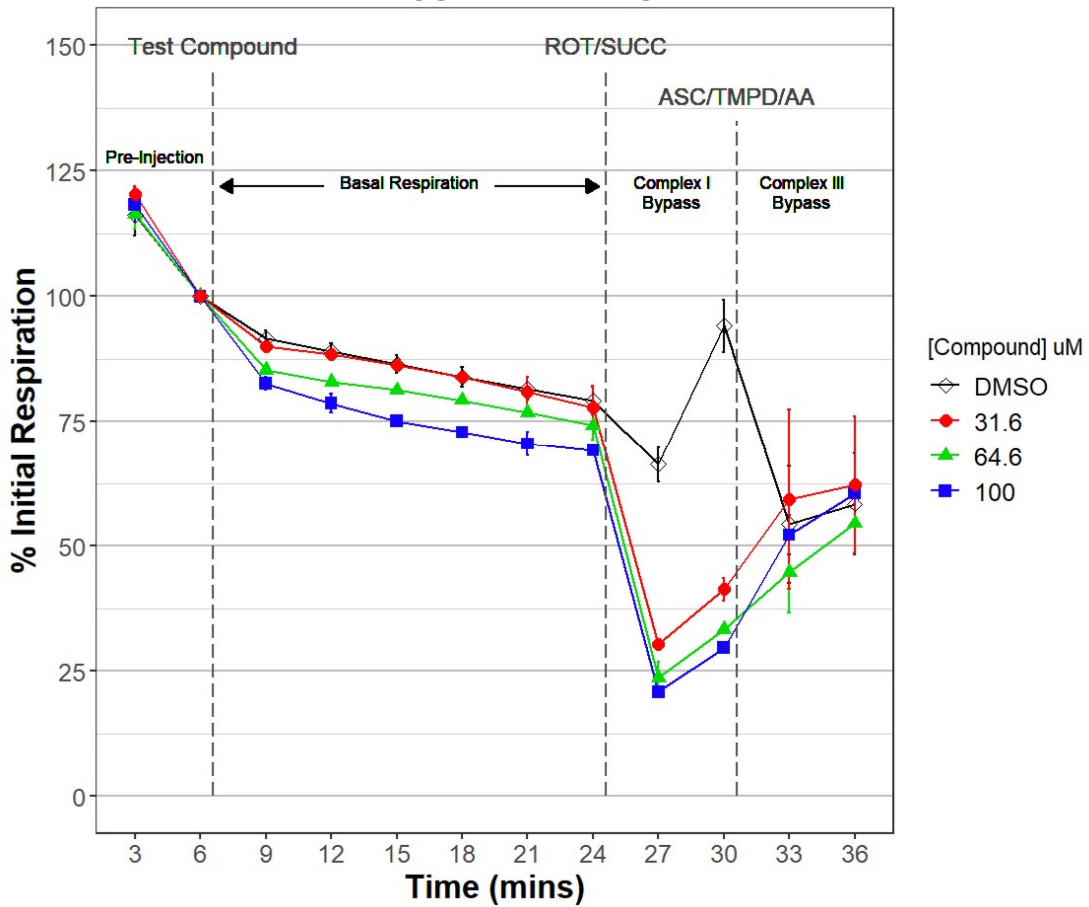

### Clomiphene citrate (1:1)

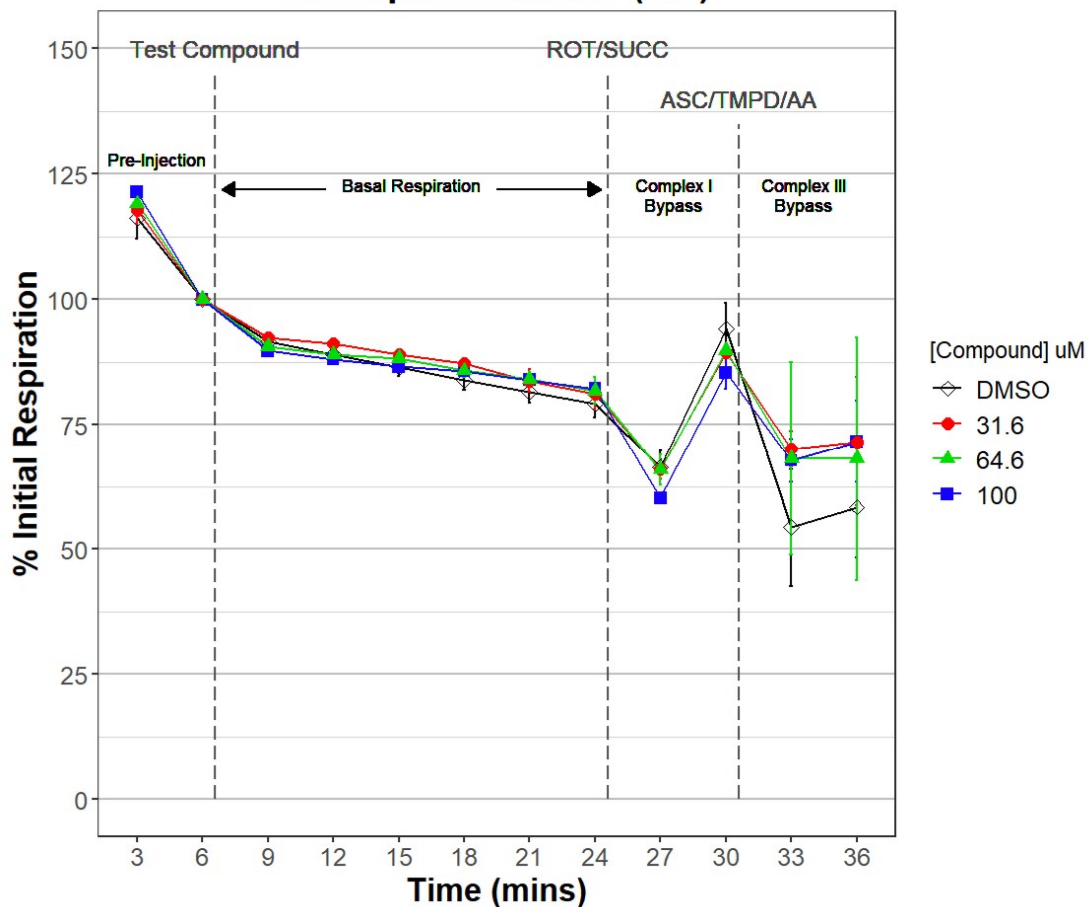

### Clorophene

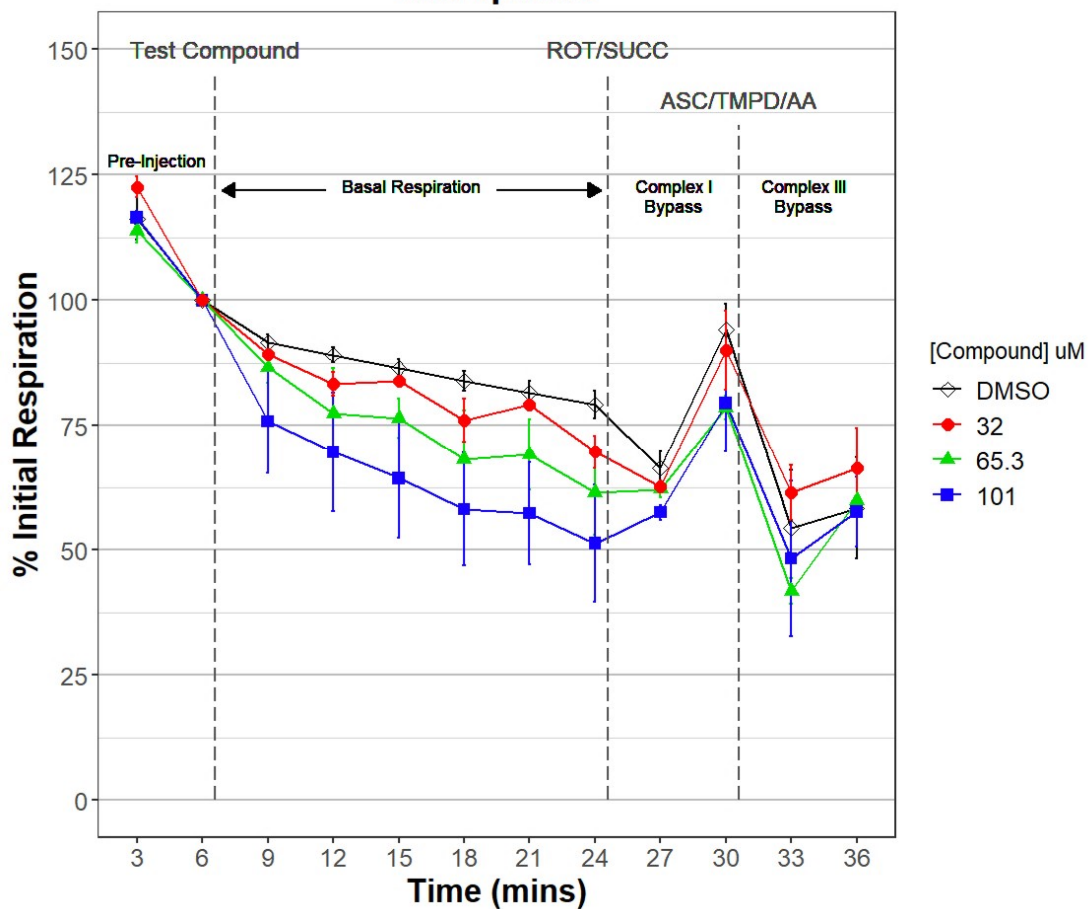

## Corticosterone

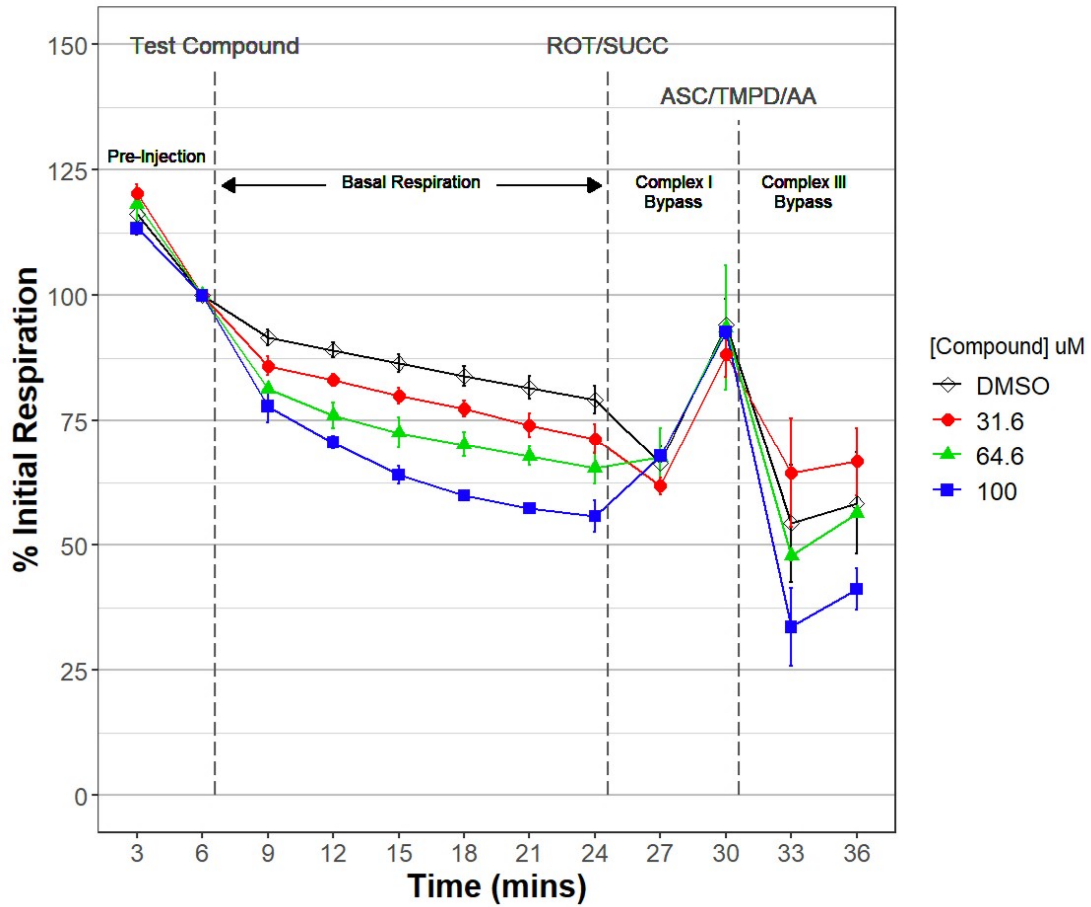

## Cyclanilide

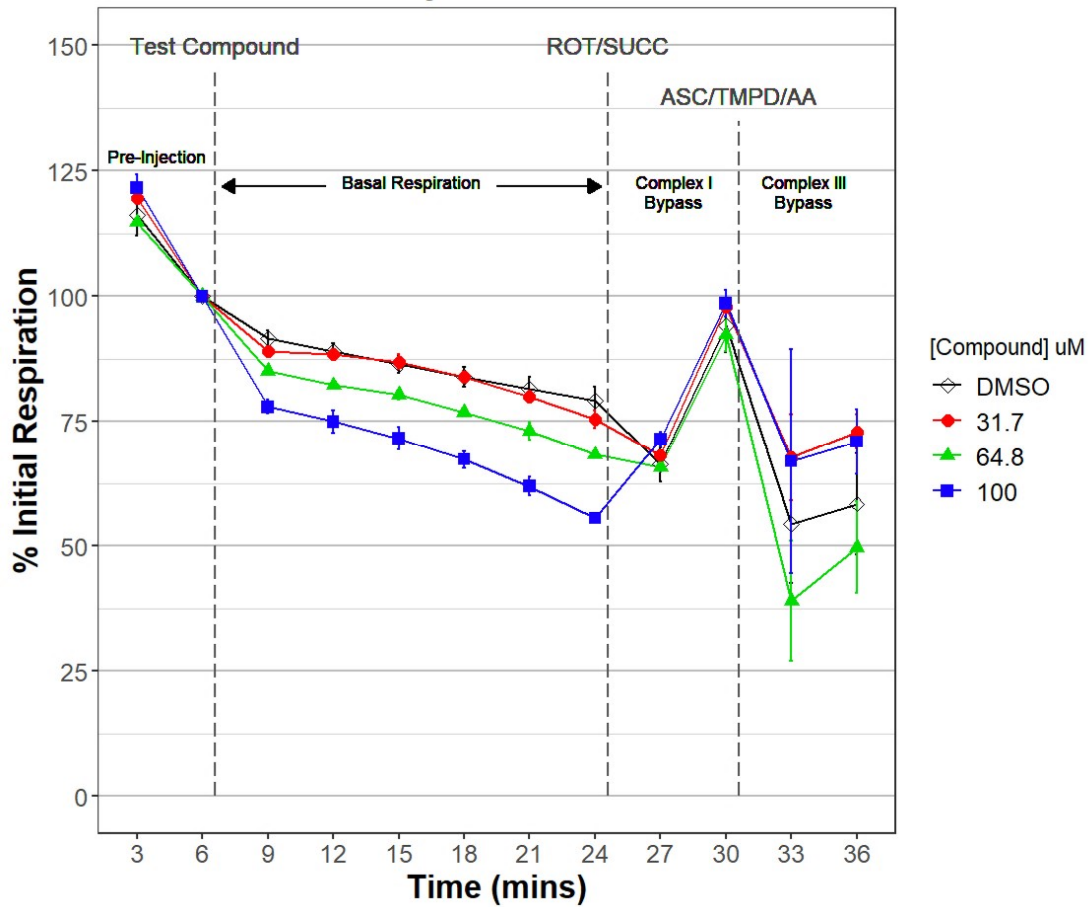

## Cyproconazole

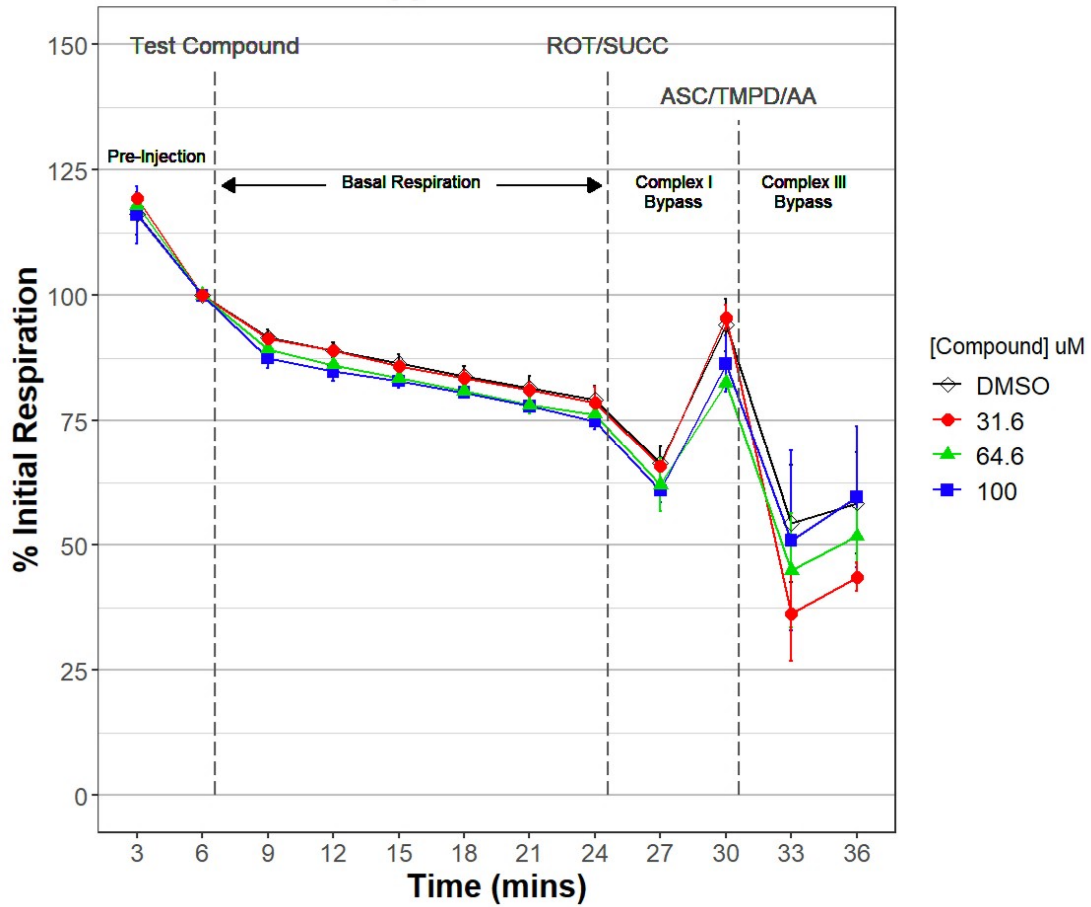

## Cyproterone acetate

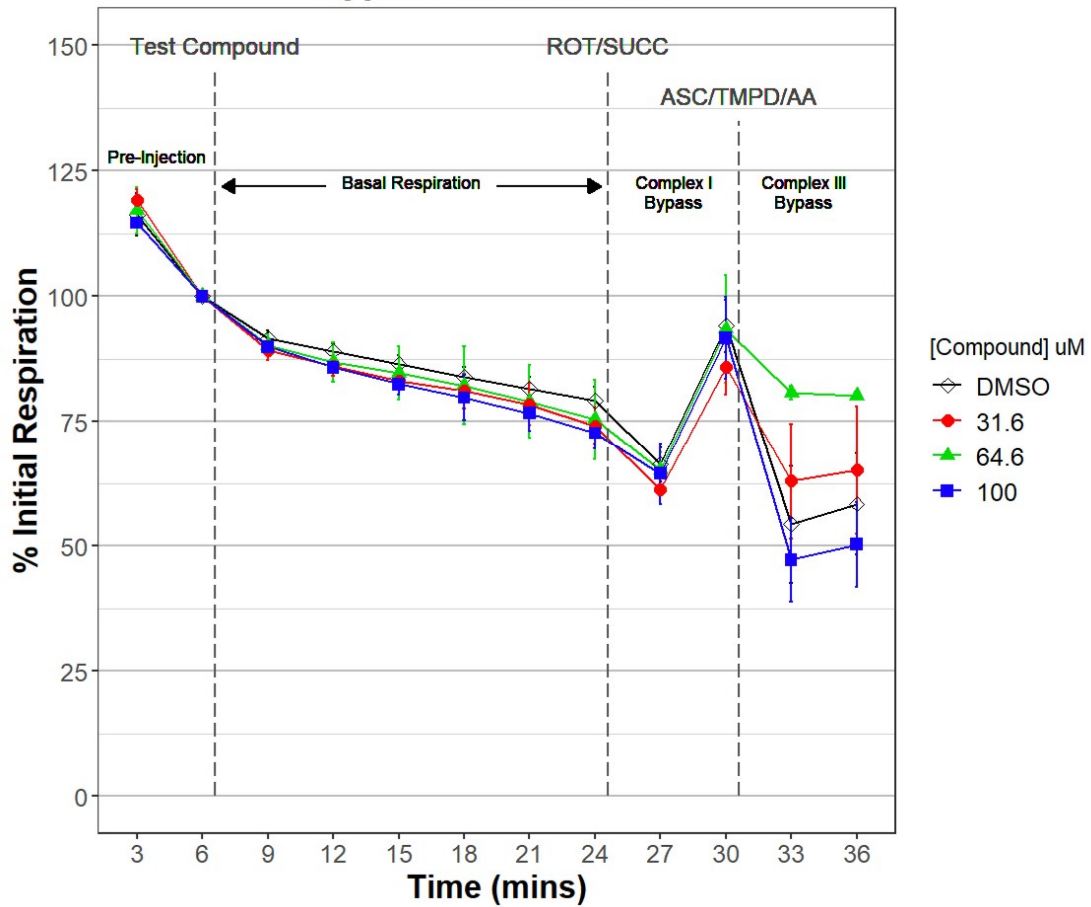



## Diallyl phthalate

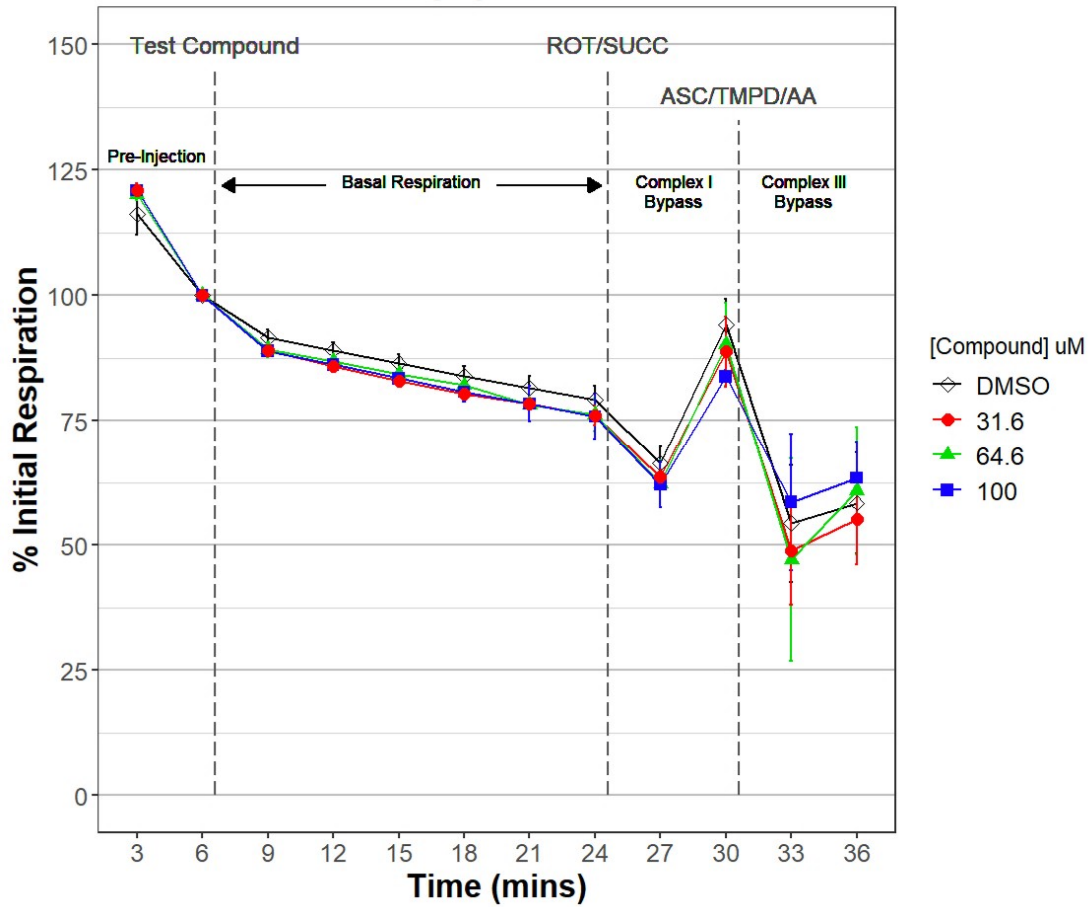

## Didecyldimethylammonium chloride

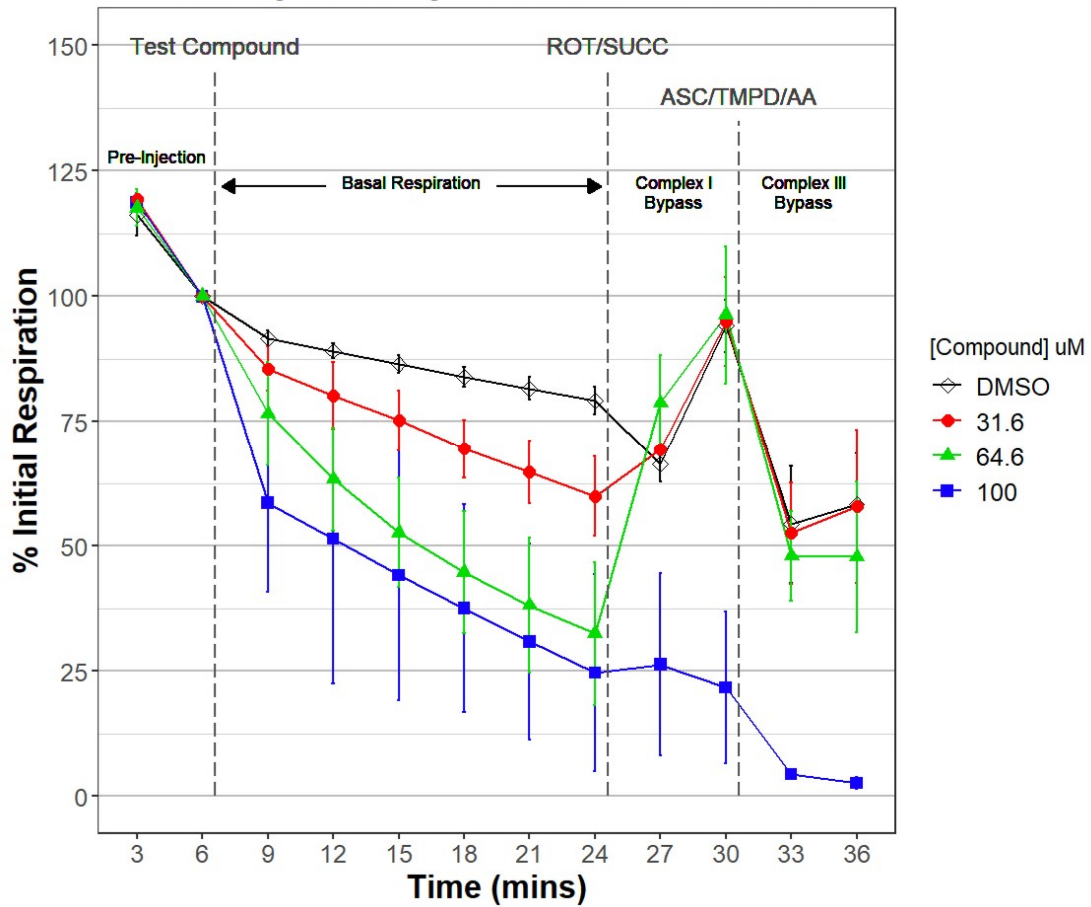



## Diethylstilbestrol

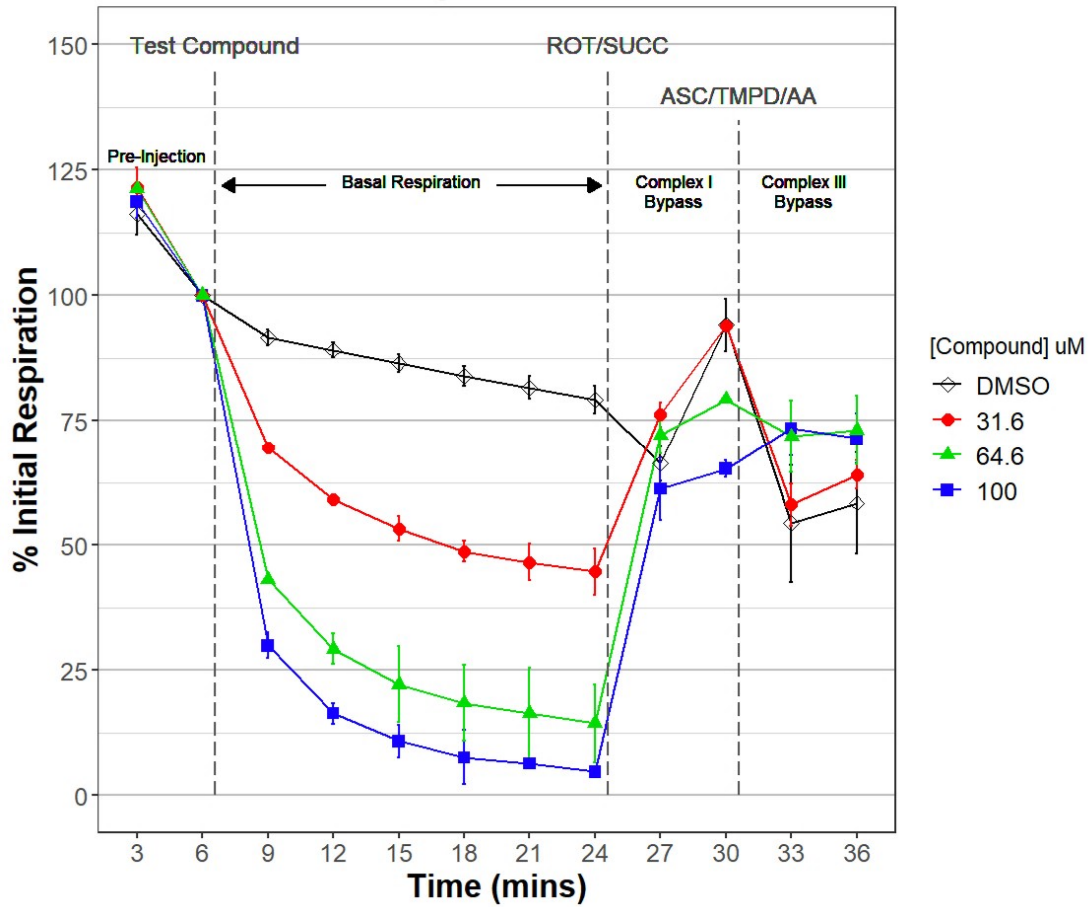

## Difenoconazole

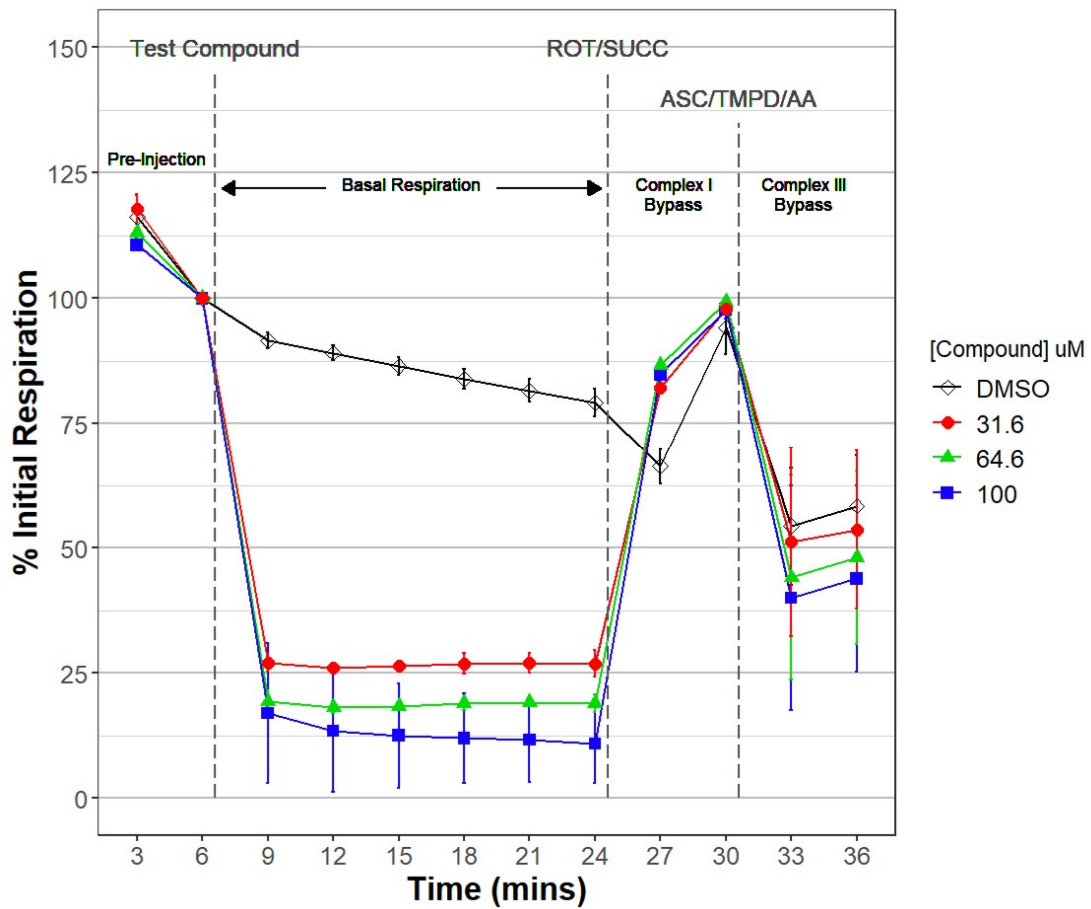

## Difenzoquat metilsulfate

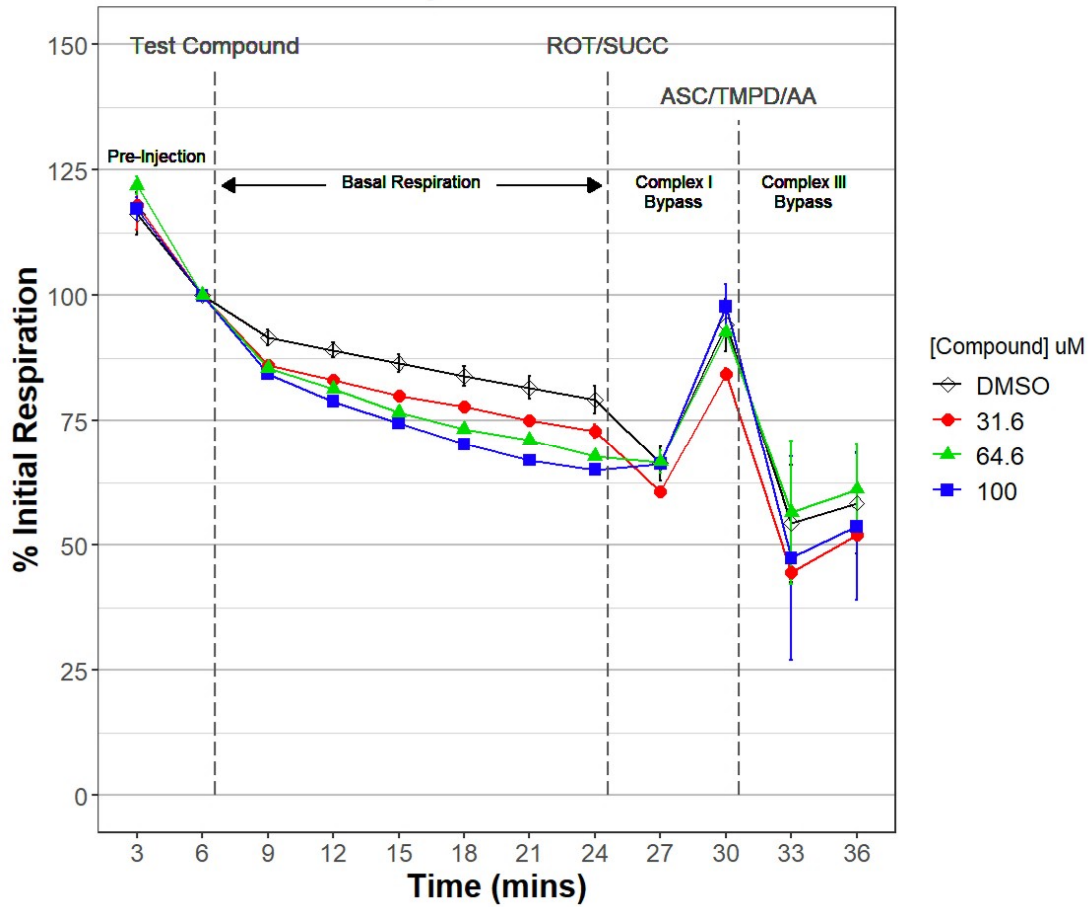

## Diisobutyl phthalate

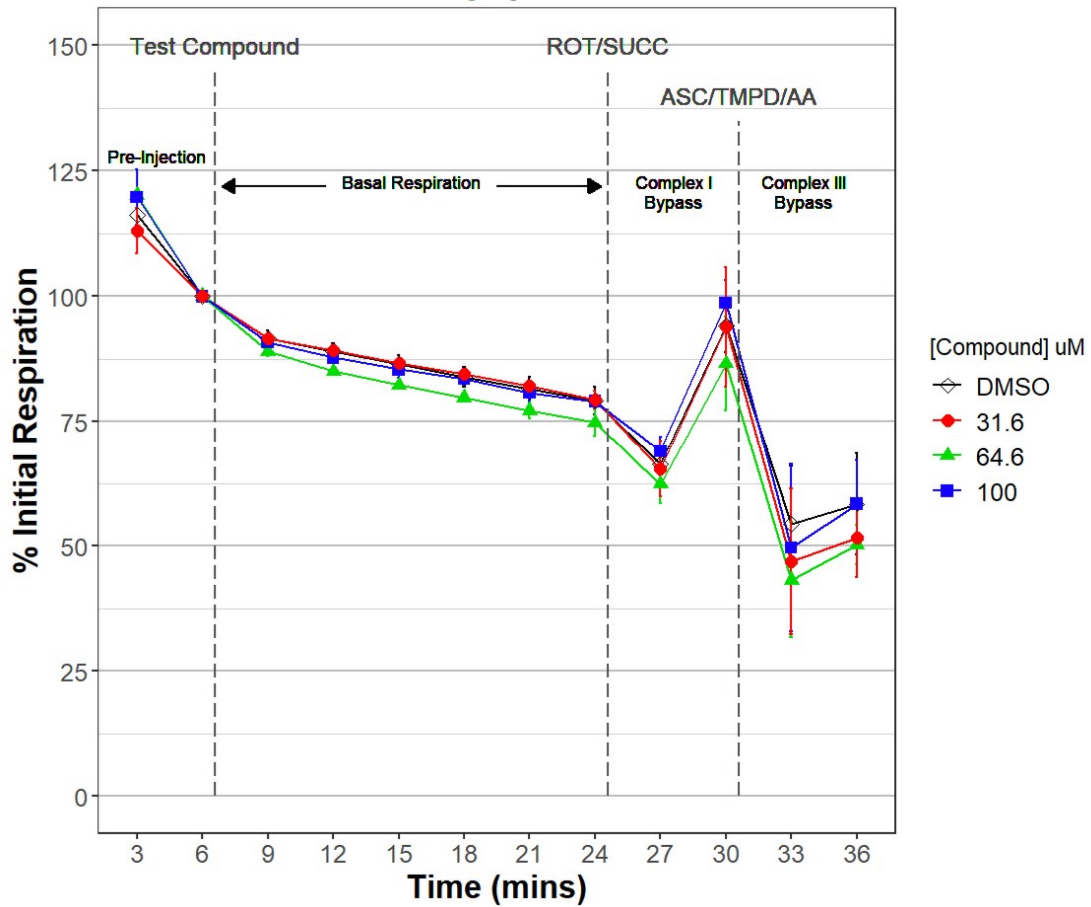

## Diniconazole

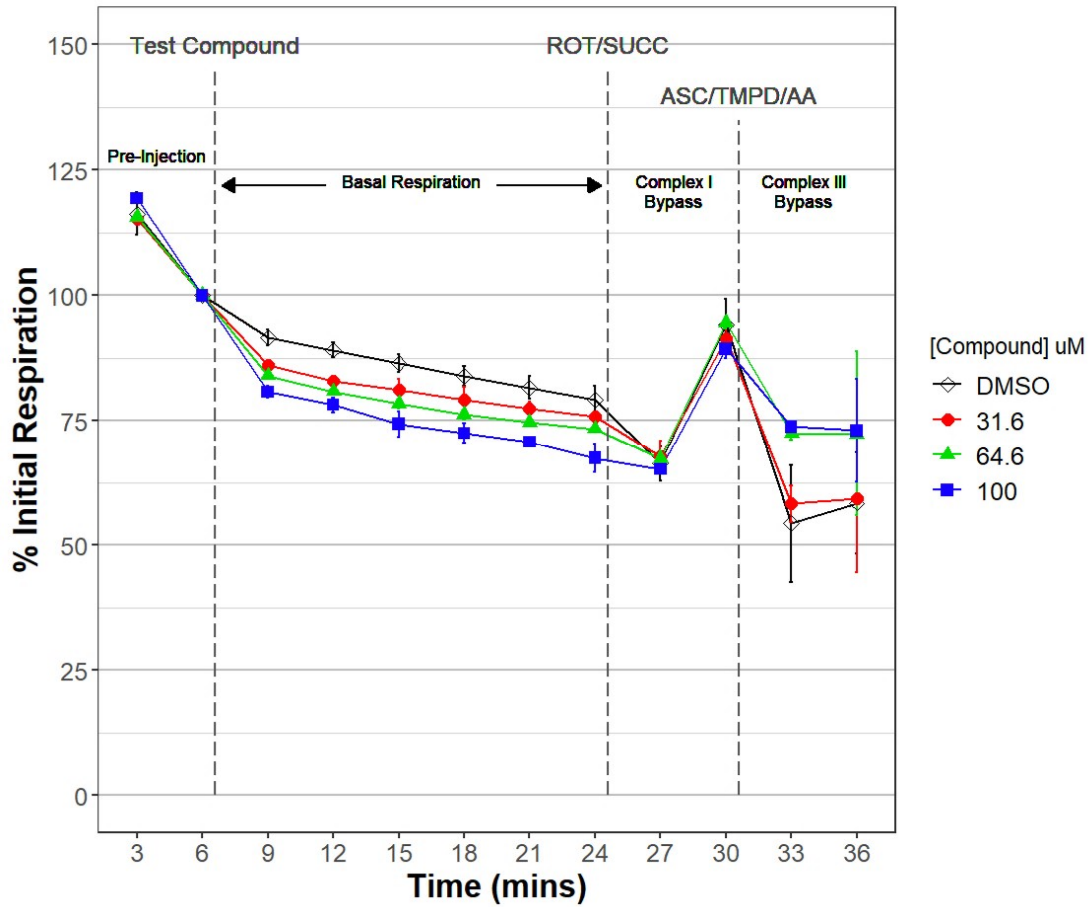

## Docosate sodium

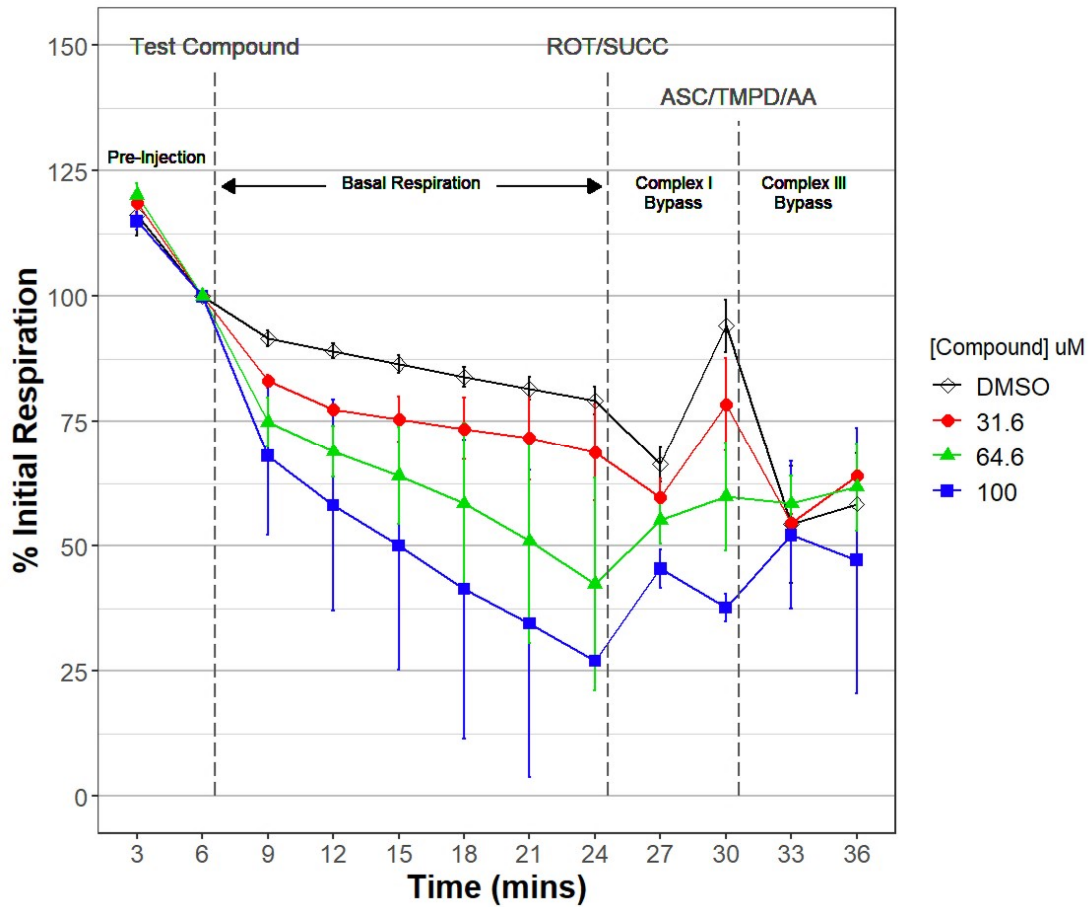

## Dodecylbenzenesulfonic acid

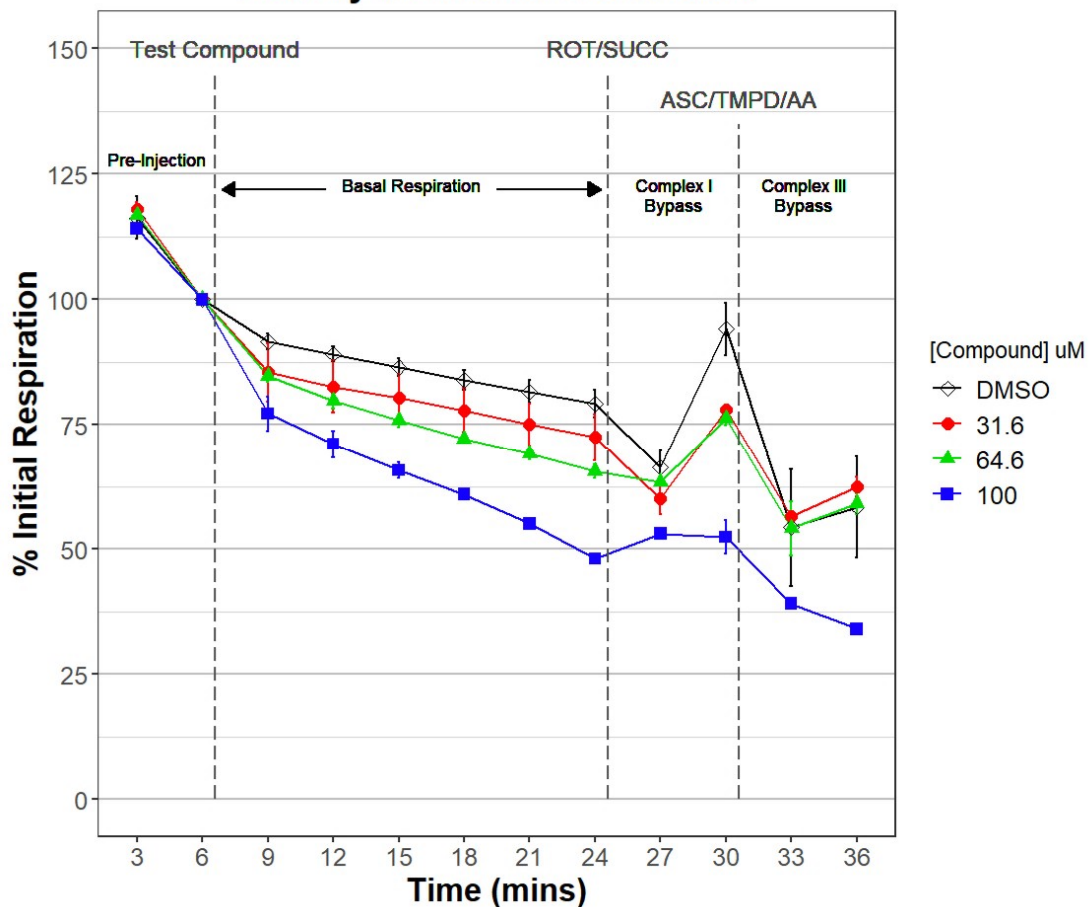

## Dodecyltrimethylammonium chloride

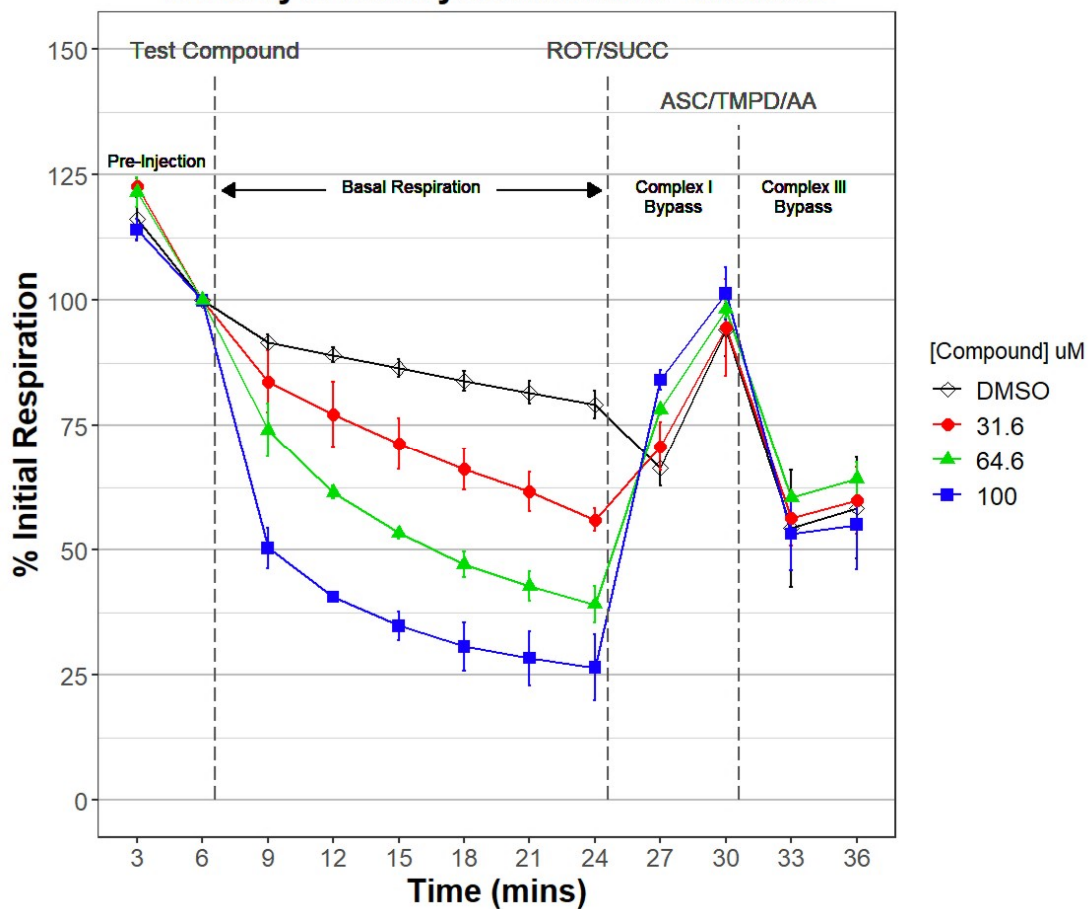

## Elzasonan

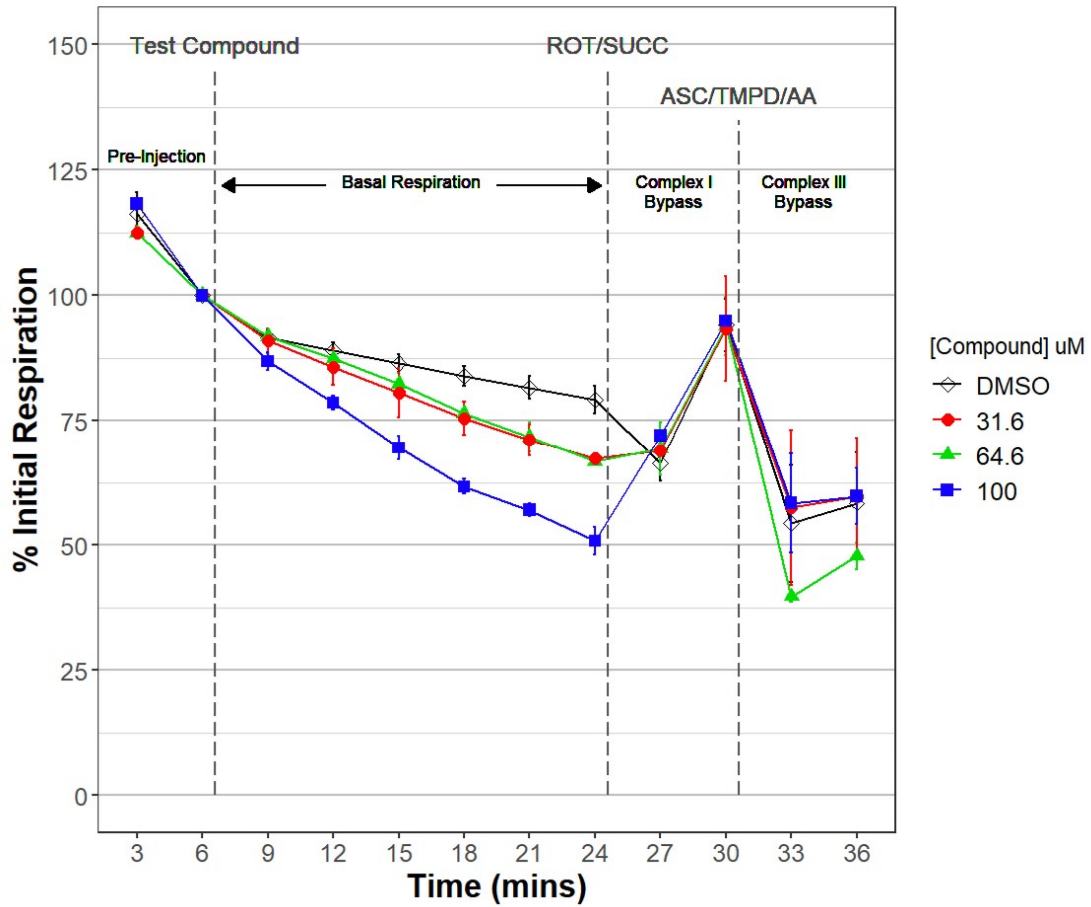

## Emamectin benzoate

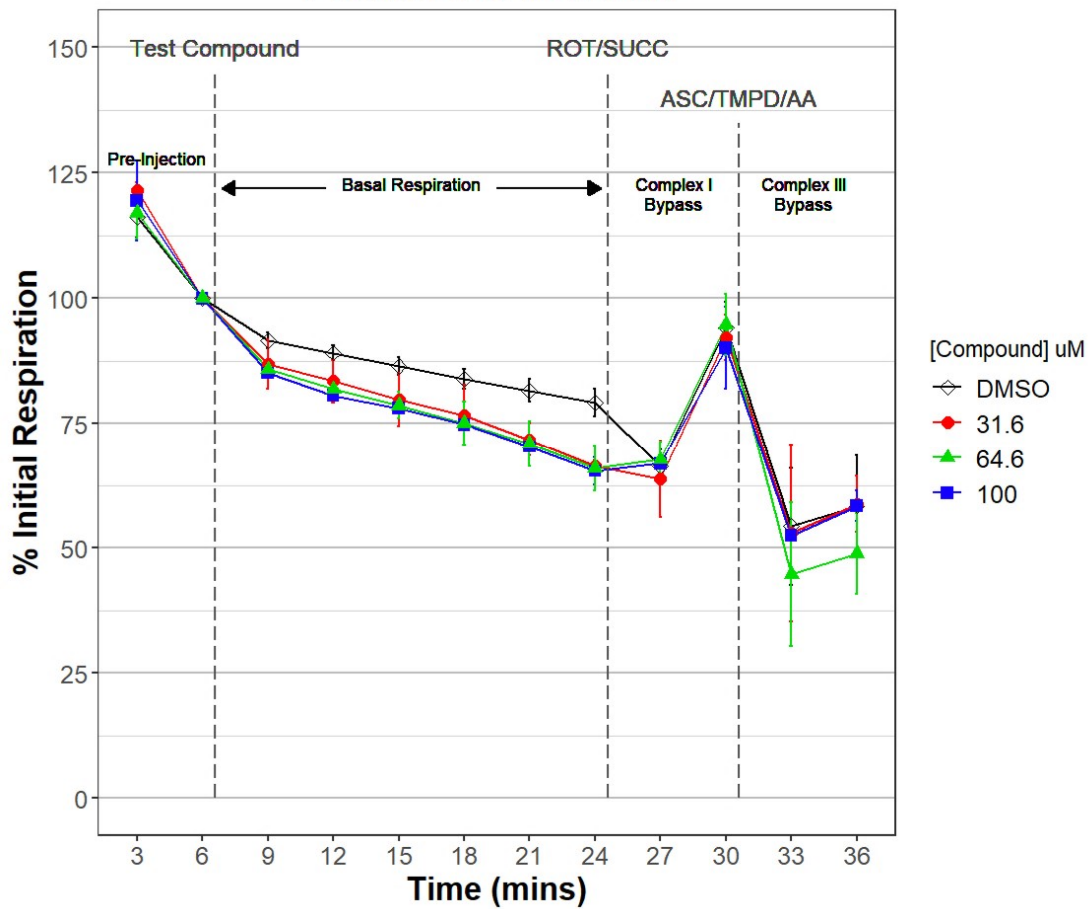



## Ethofumesate

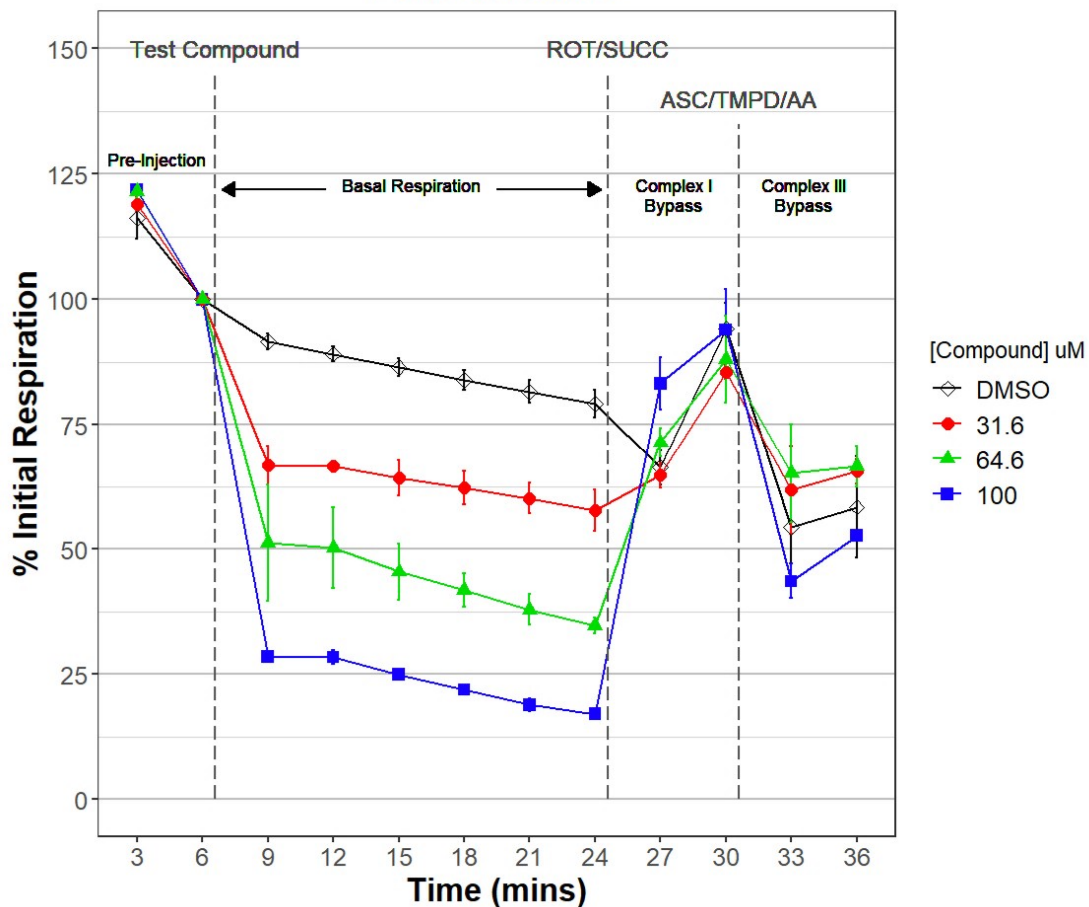

## Ethoprop

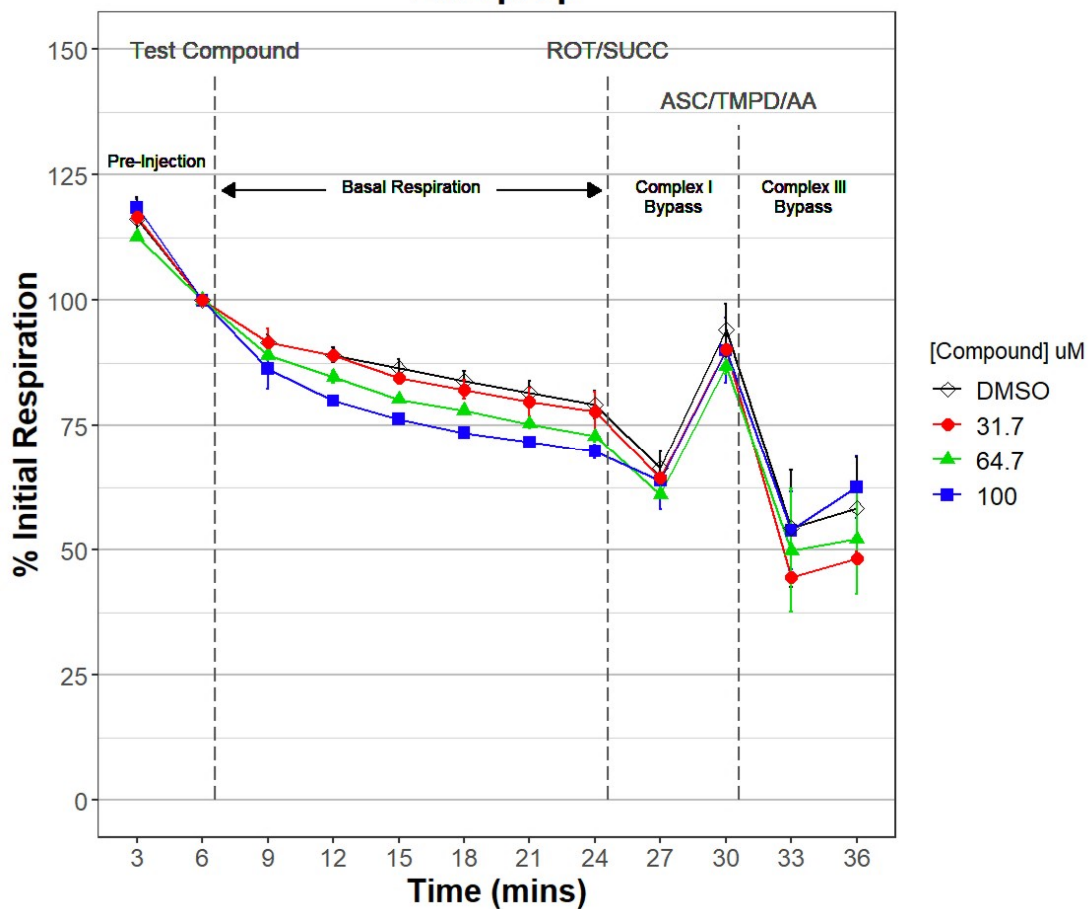



# FENP

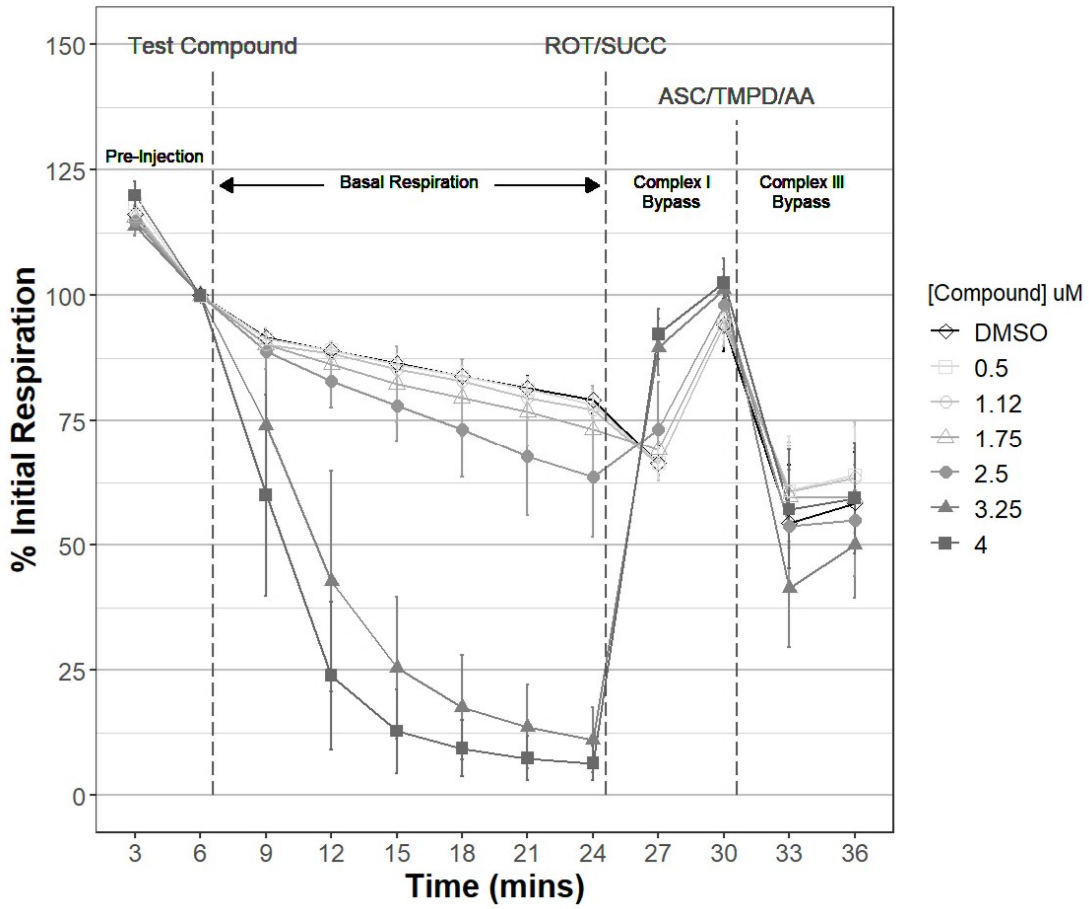

# FR150011

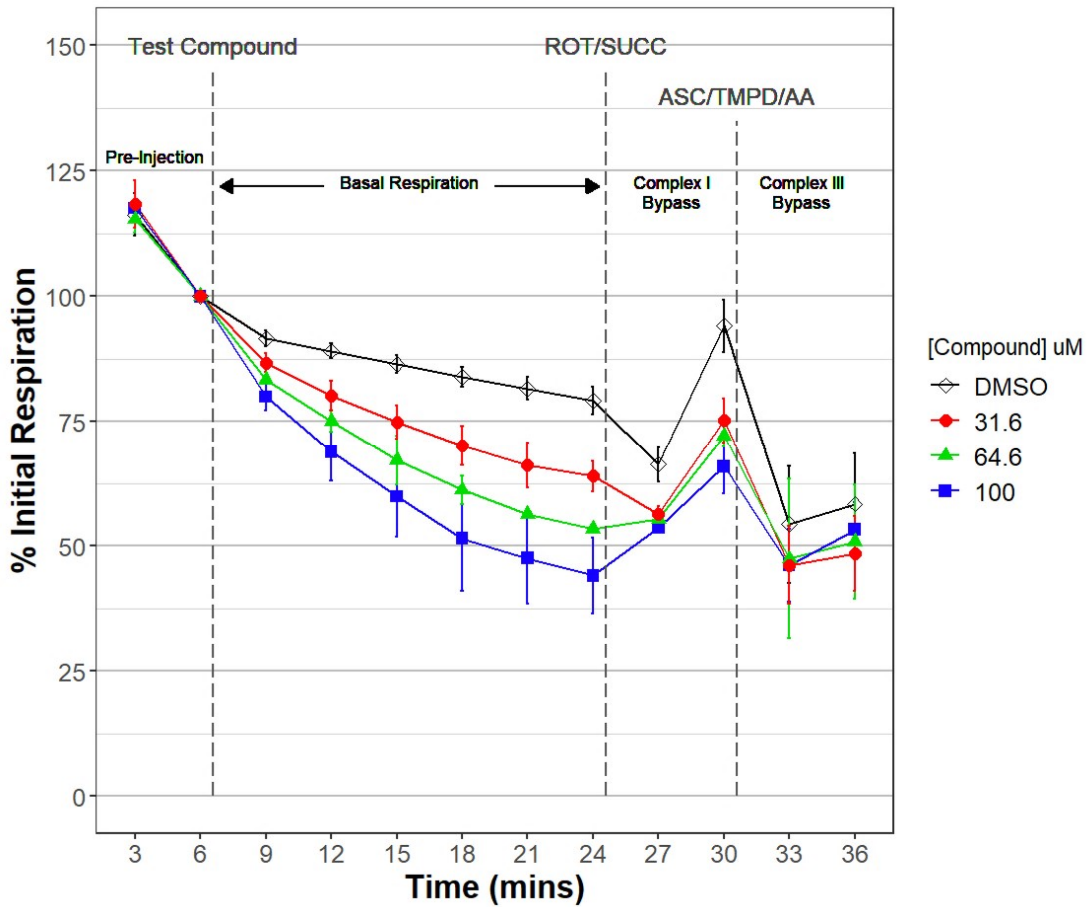

## Famoxadone

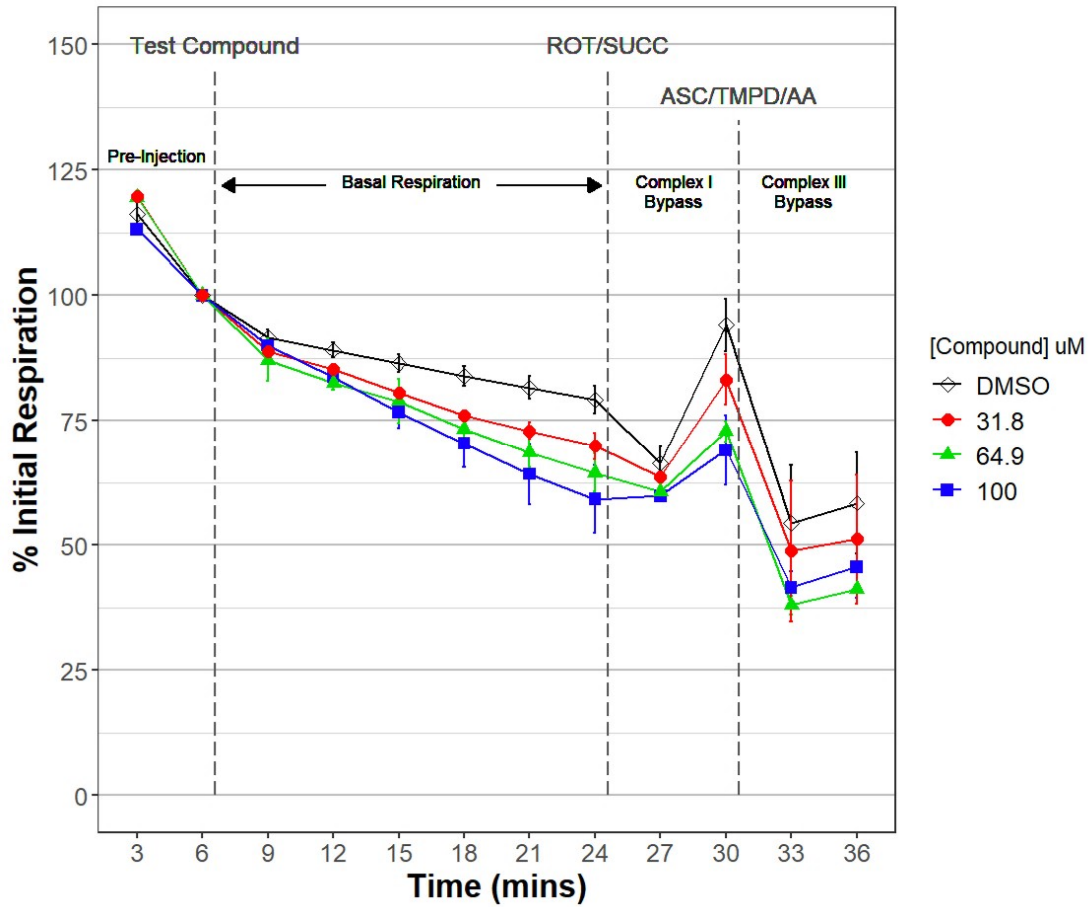

## Fenamidone

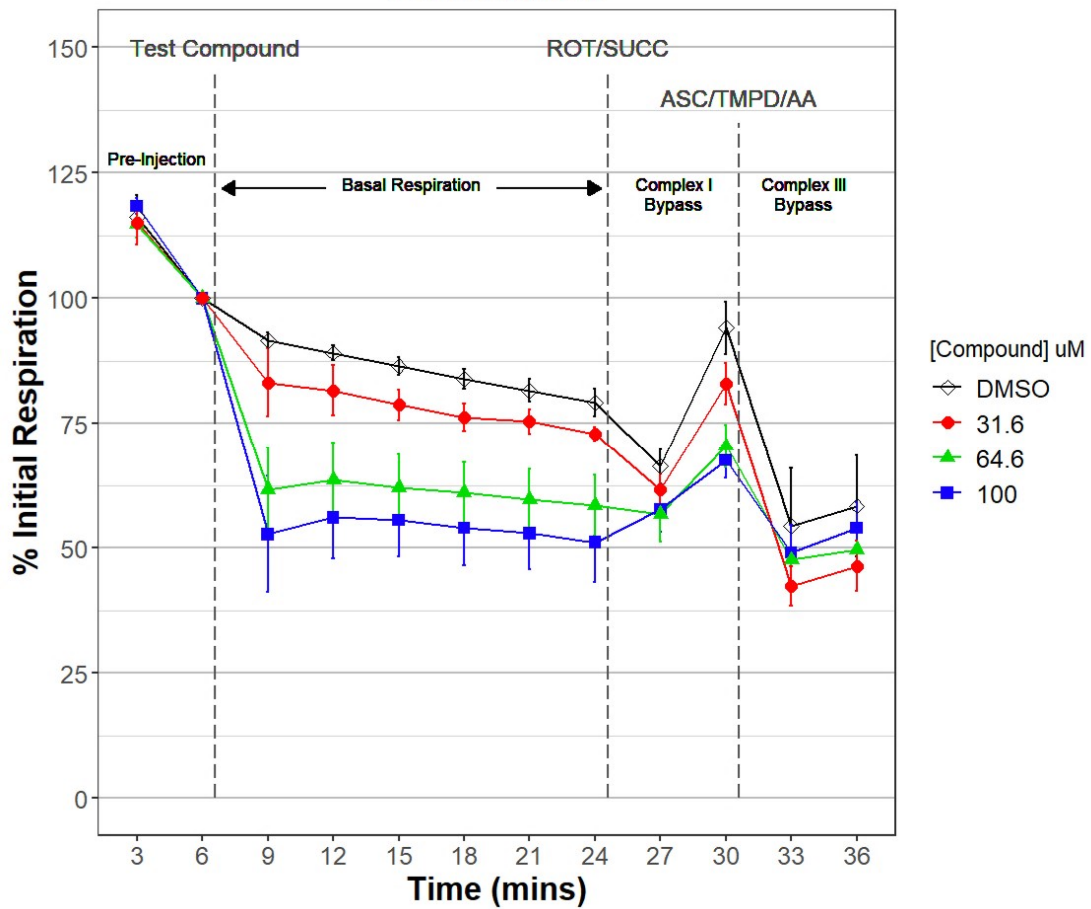

## Fenamiphos

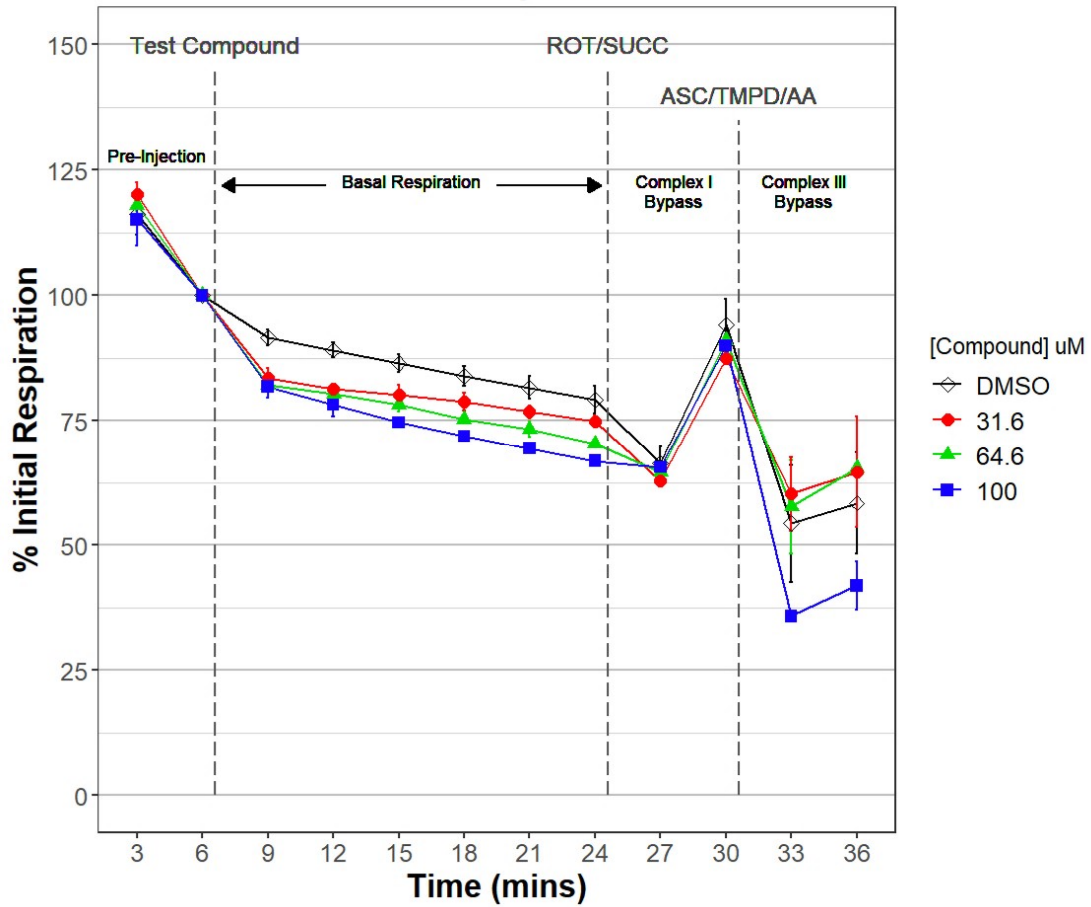

## Fenhexamid

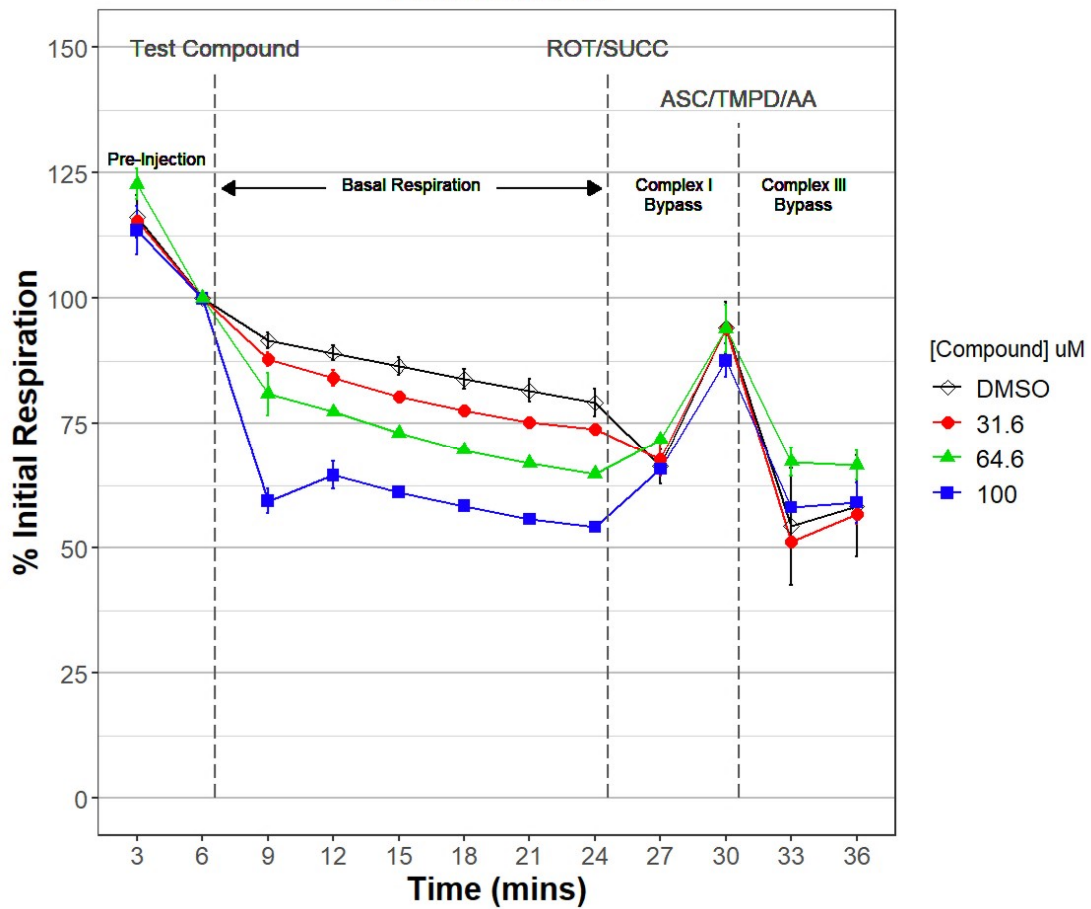

## Fenofibrate

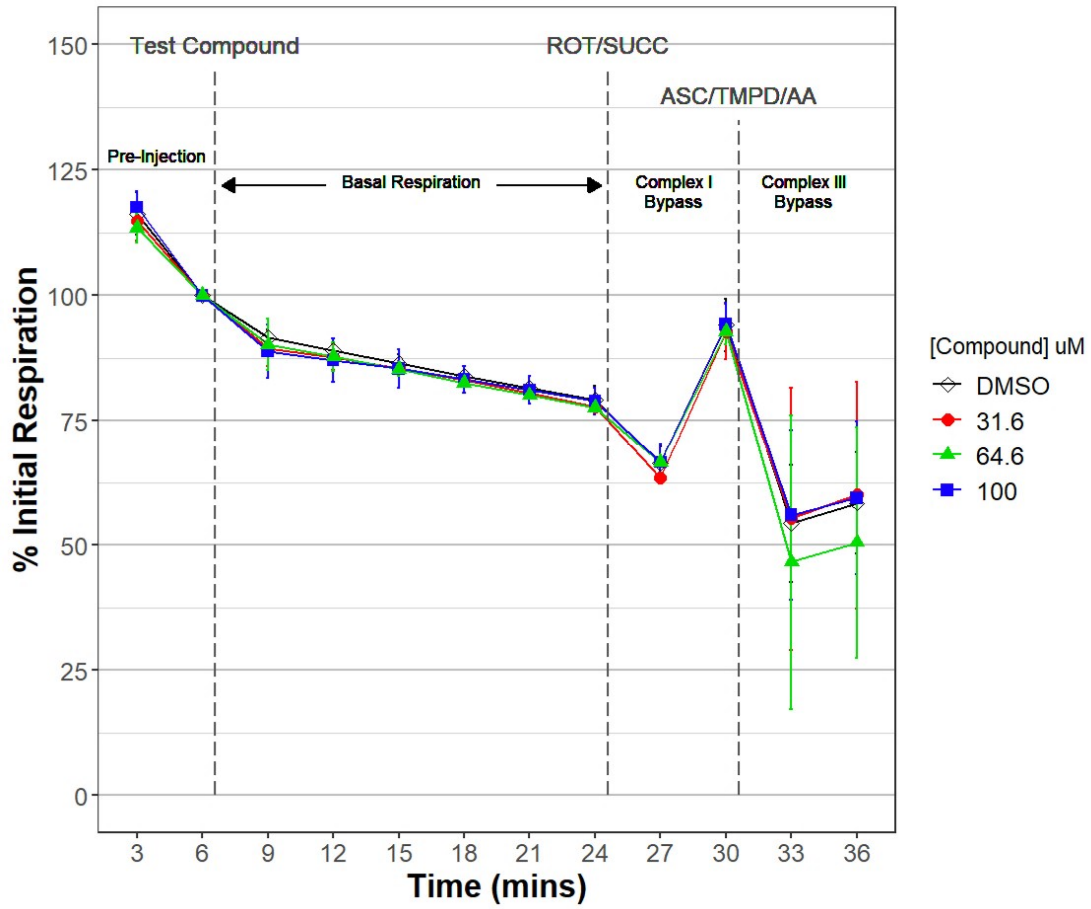

## Fenoxycarb

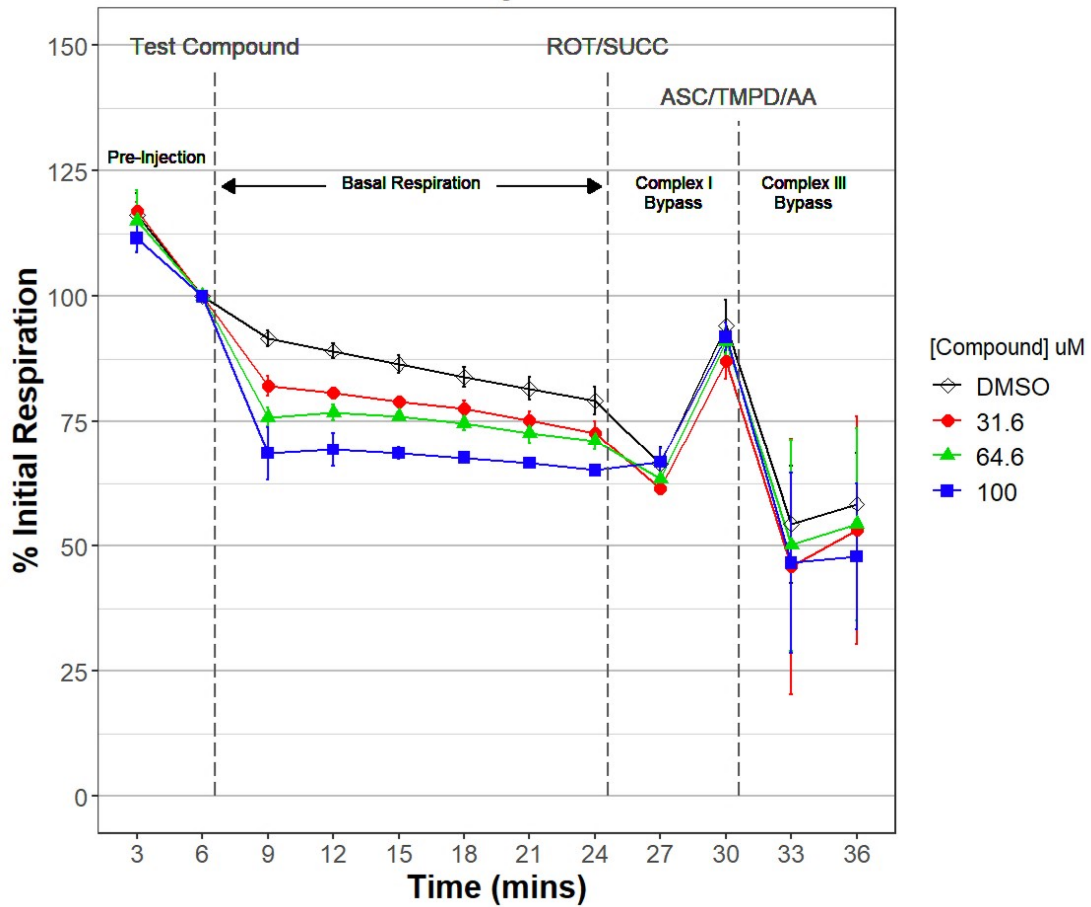

## Fenpyroximate (Z,E)

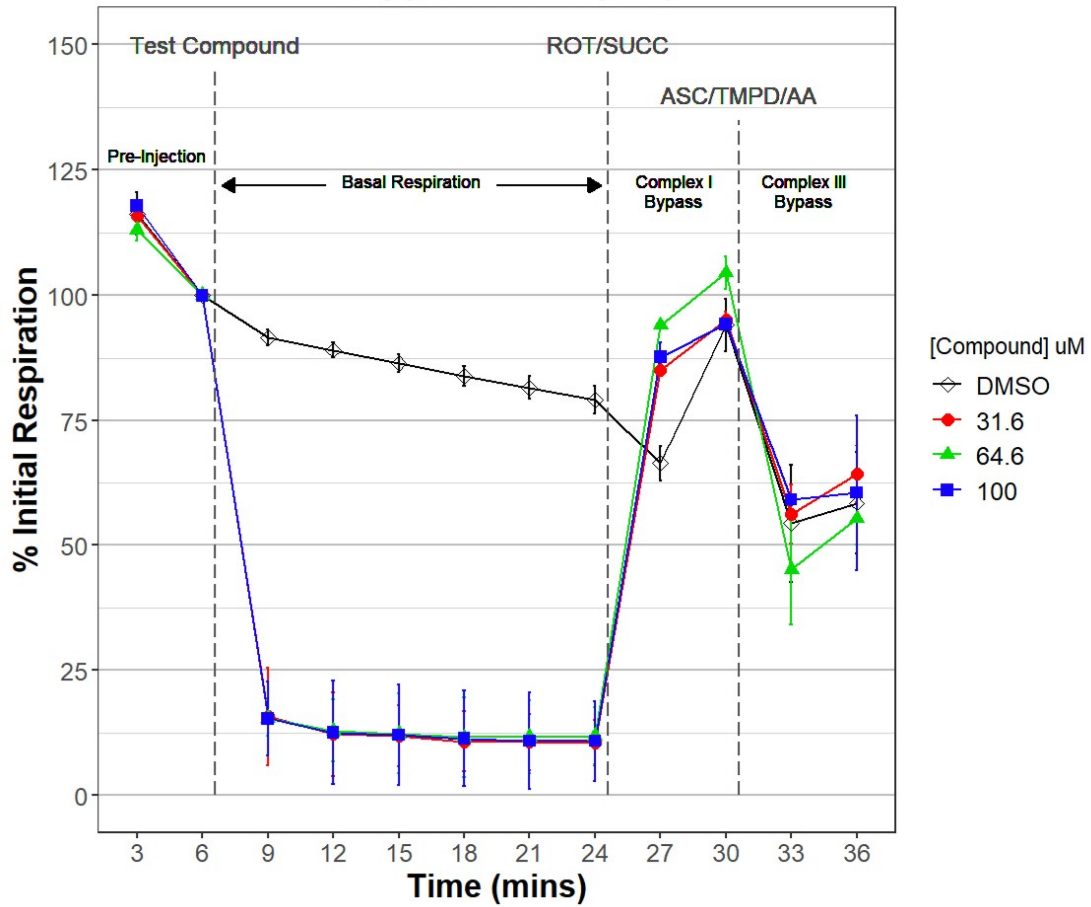

## Flumioxazin

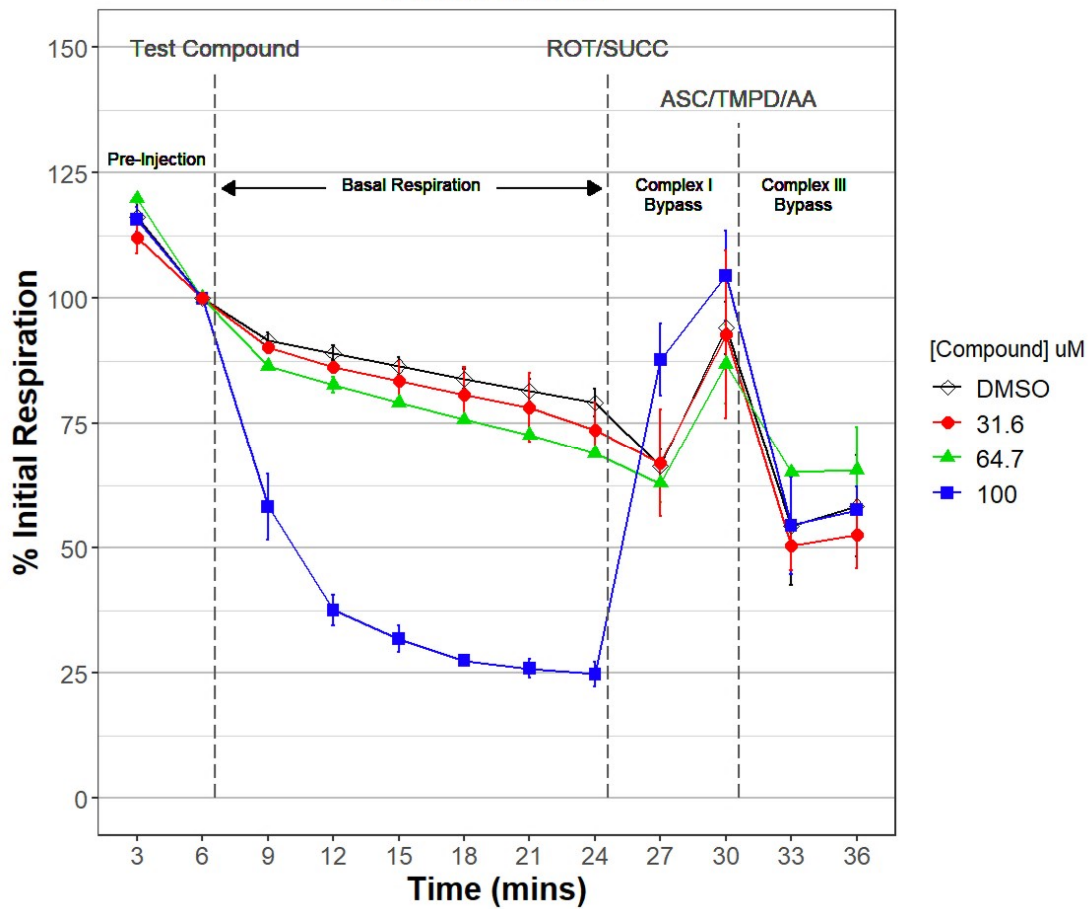



## Fluoxastrobin

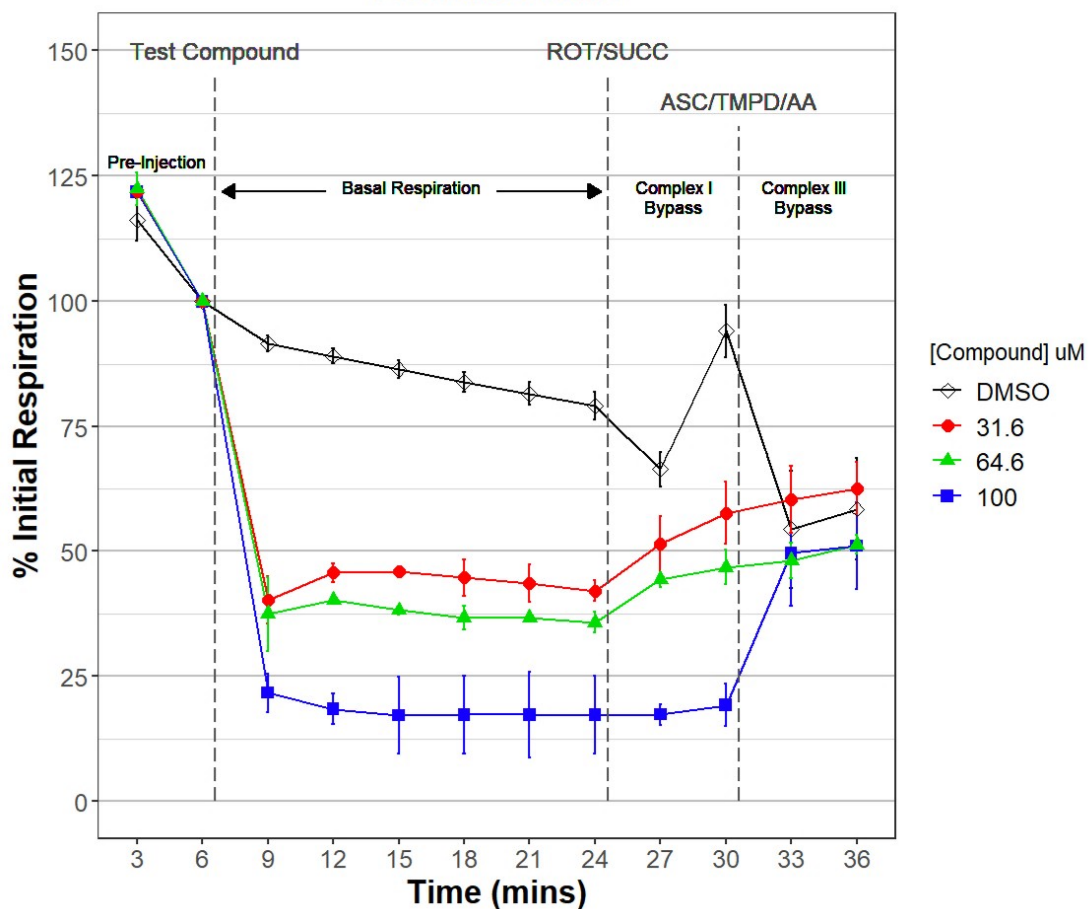

## Flusilazole

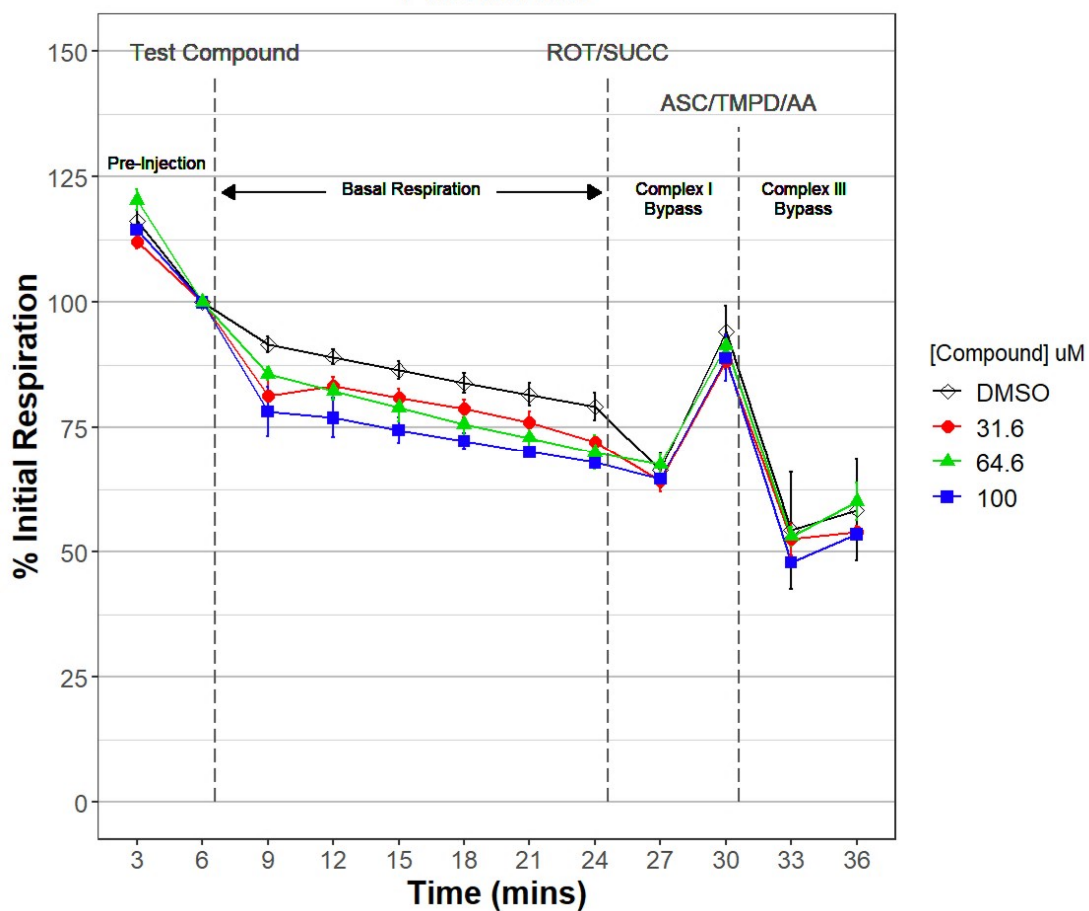

# Forchlorfenuron

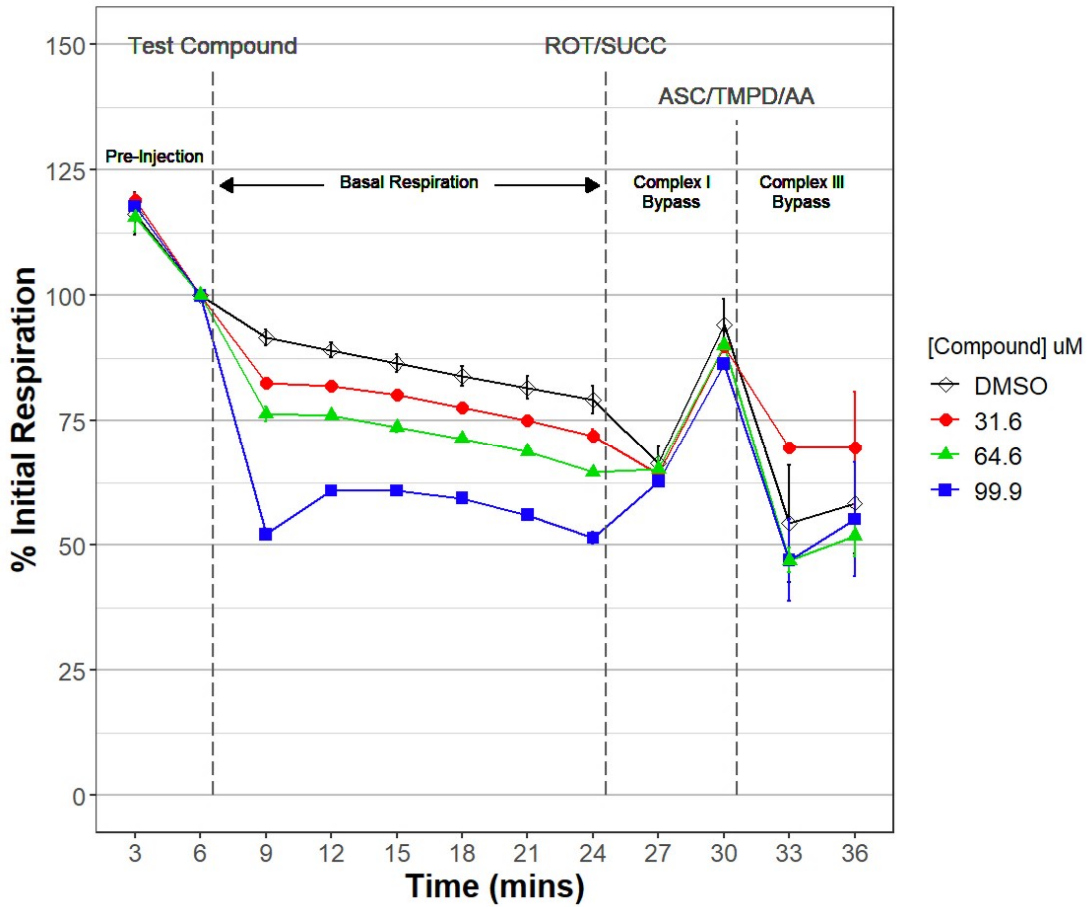

# HMR1426

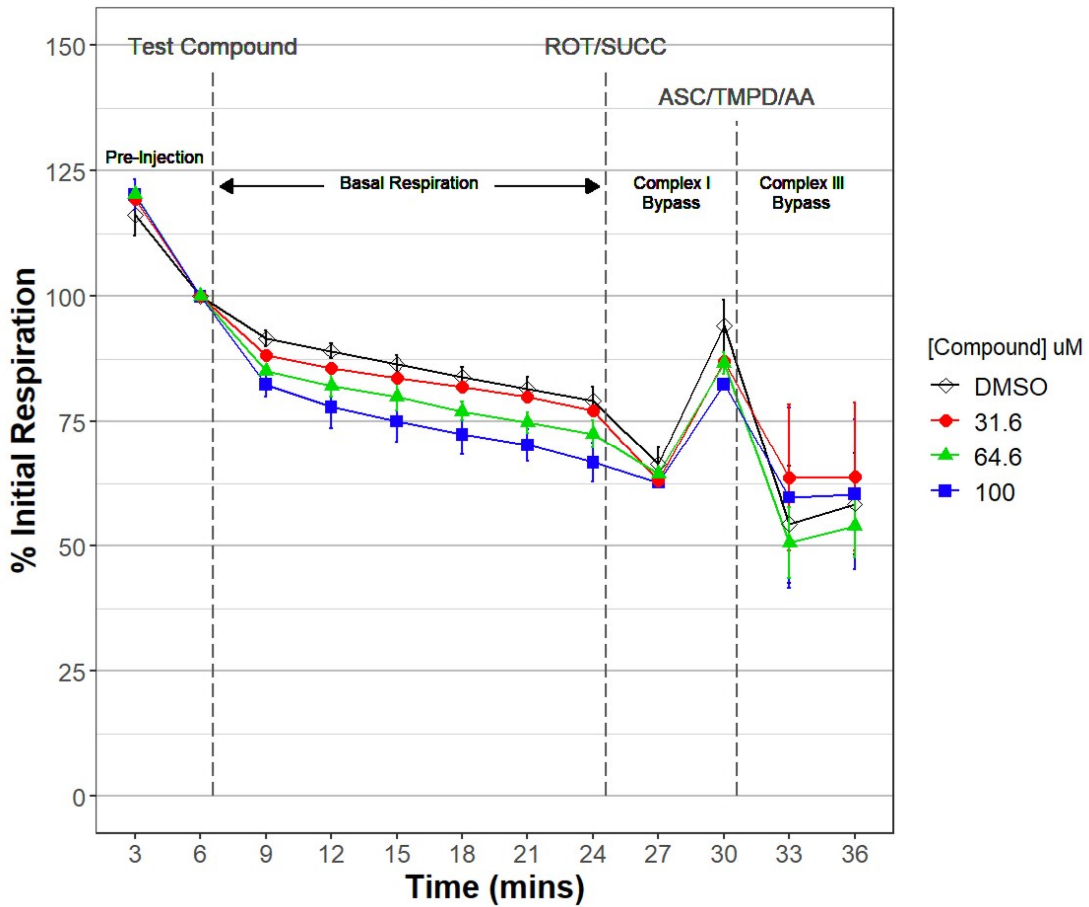

## Hexaconazole

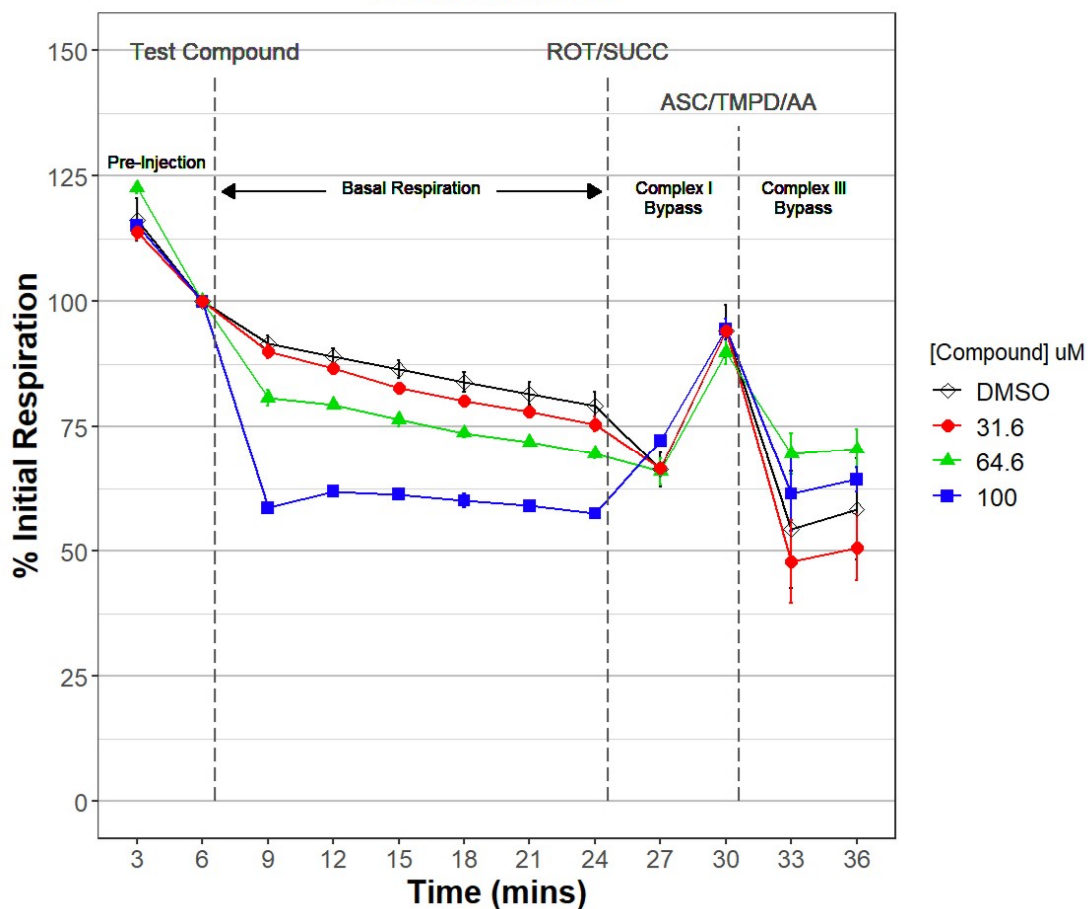

## Hydroxyflutamide

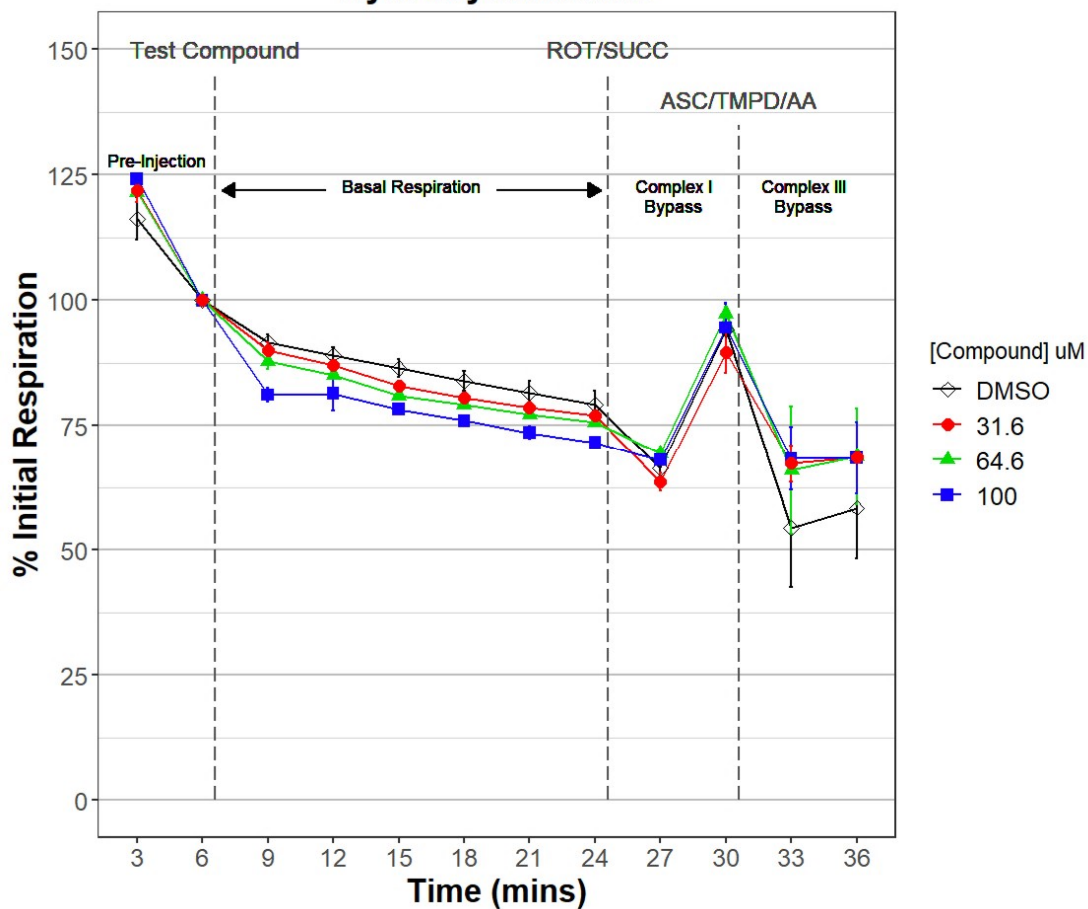

## Imazalil

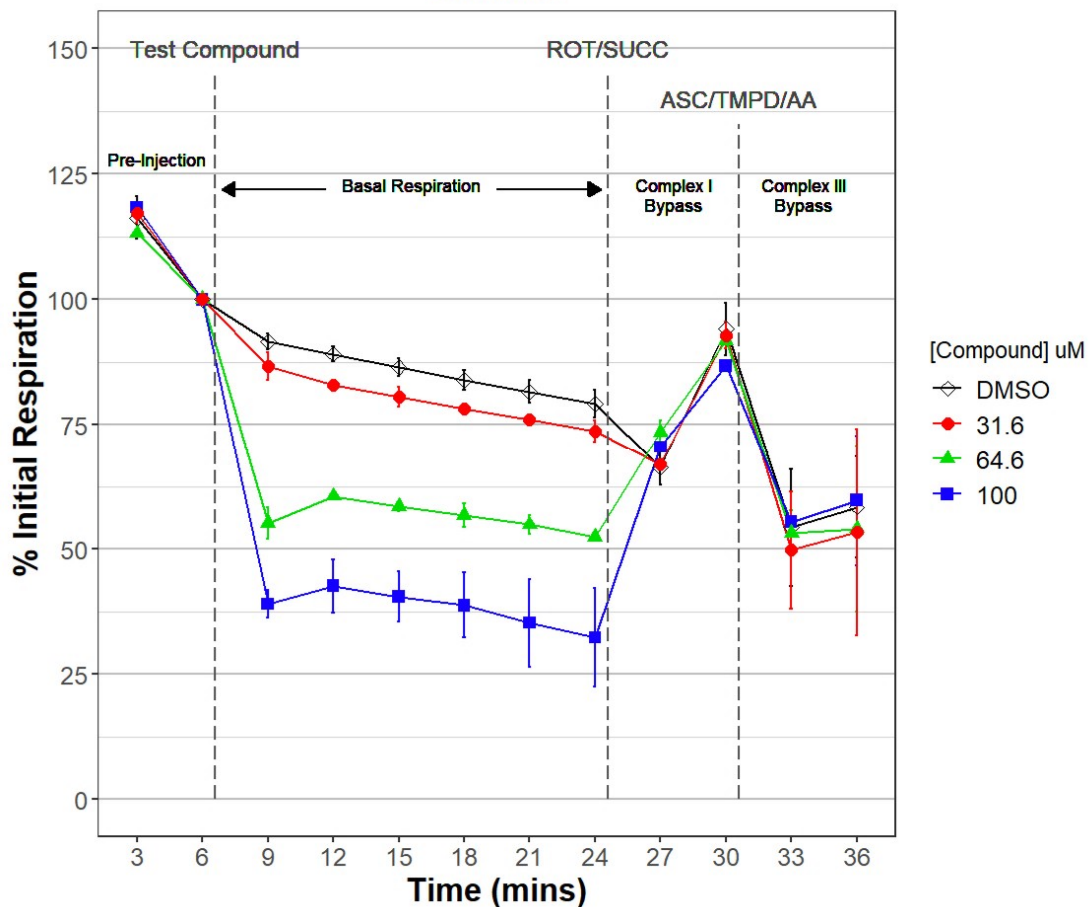

## Isazofos

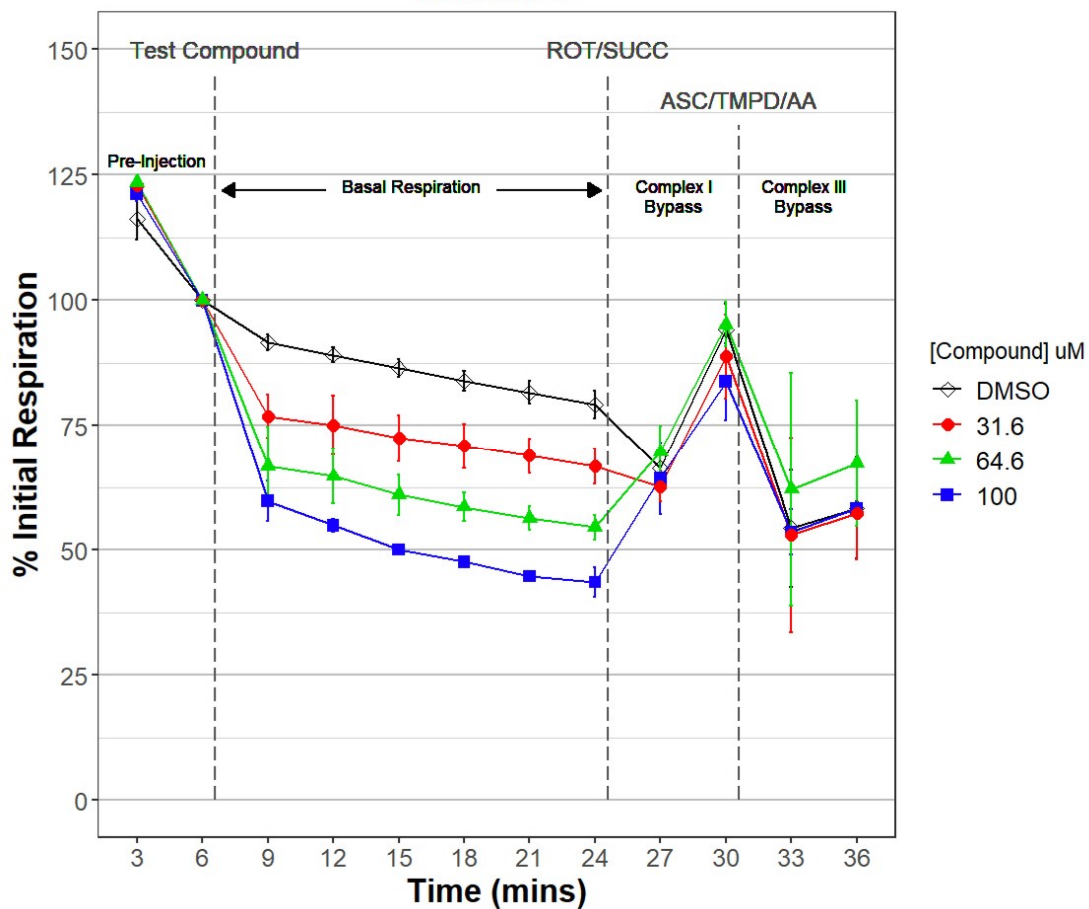

## Kepone

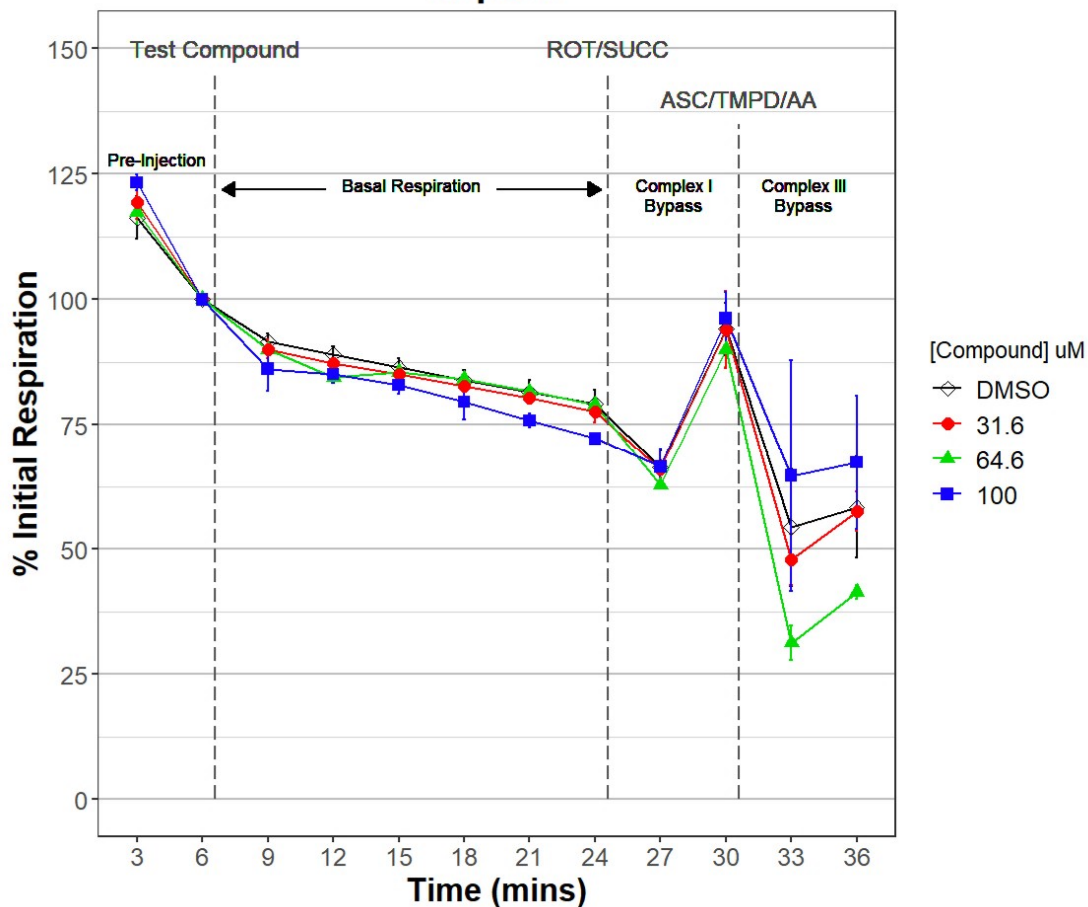

## Ketoconazole

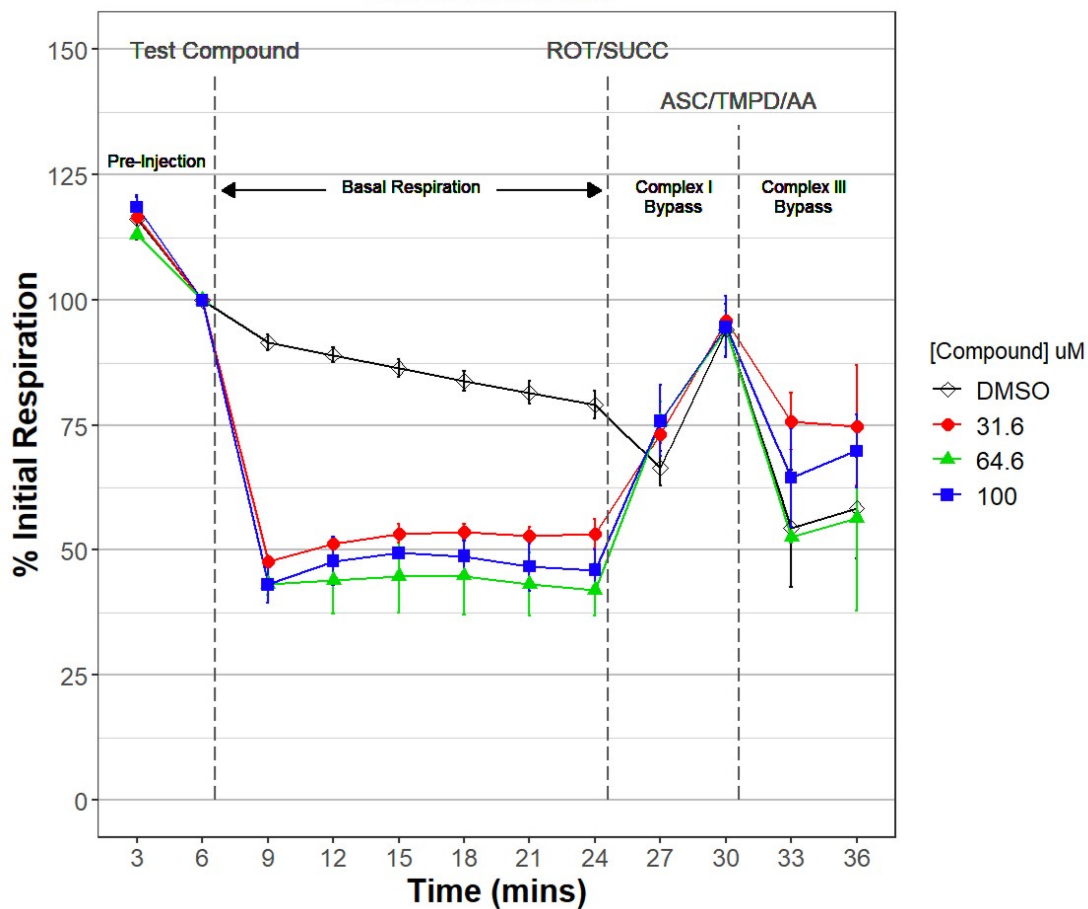



## Linuron

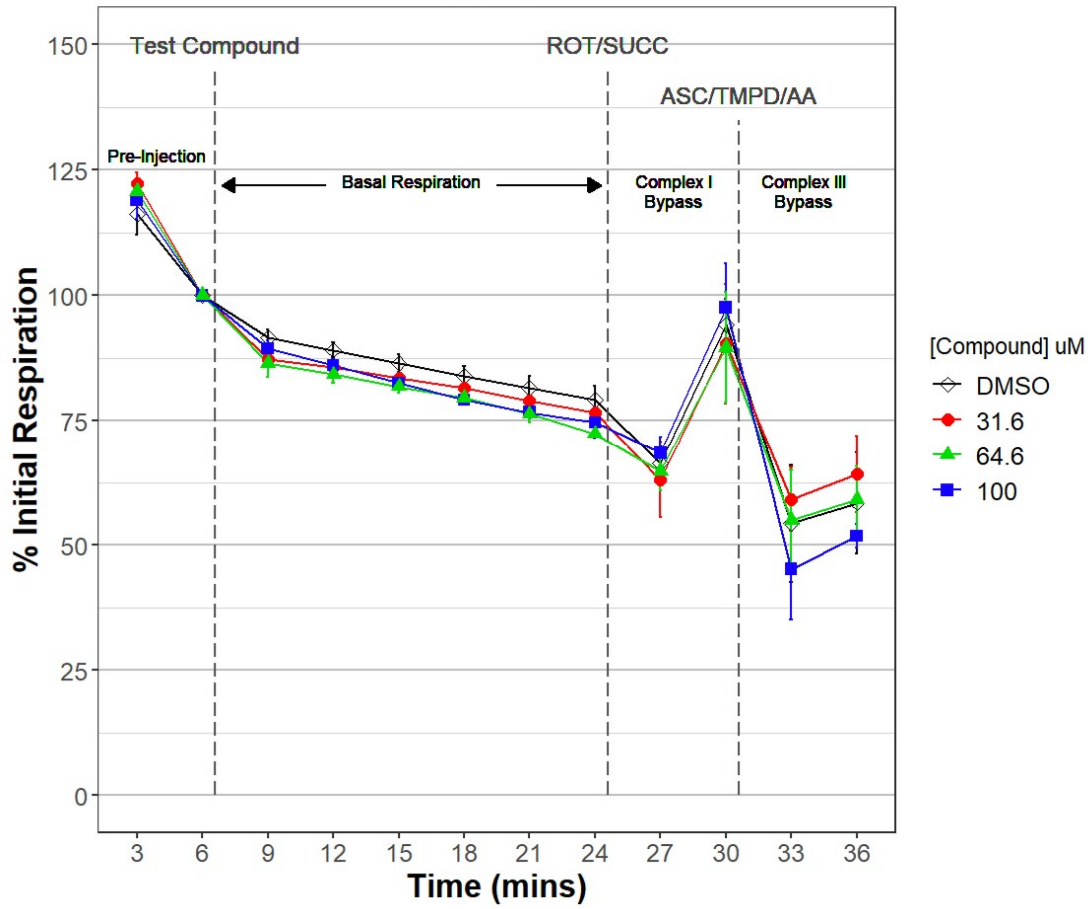

## MK-274

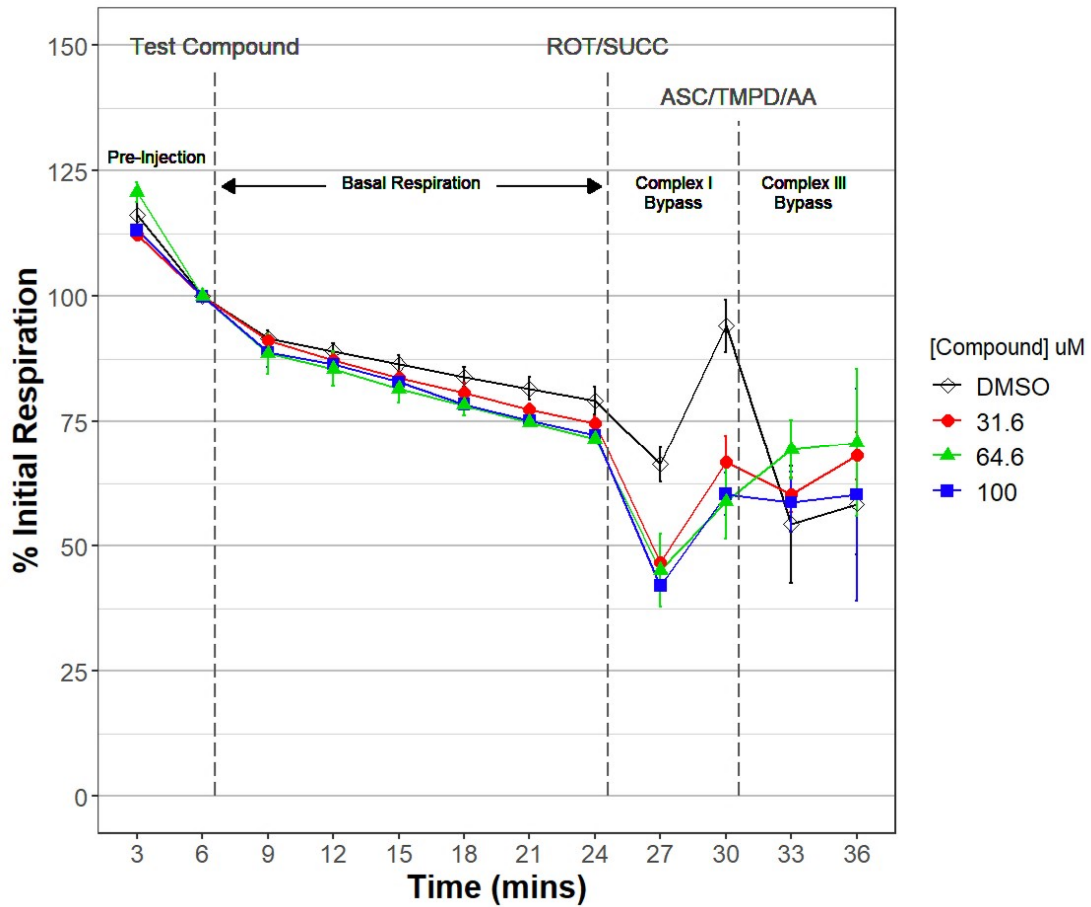

# MK-968

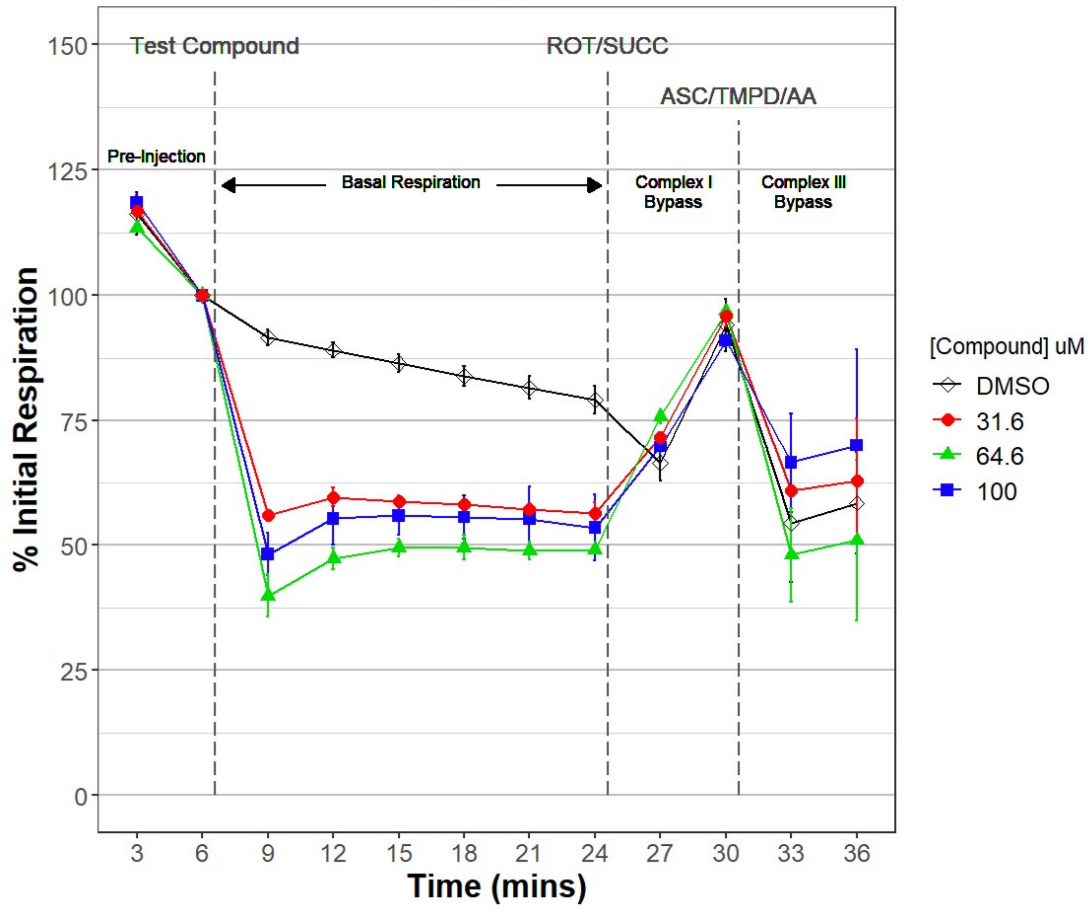

# MYXO

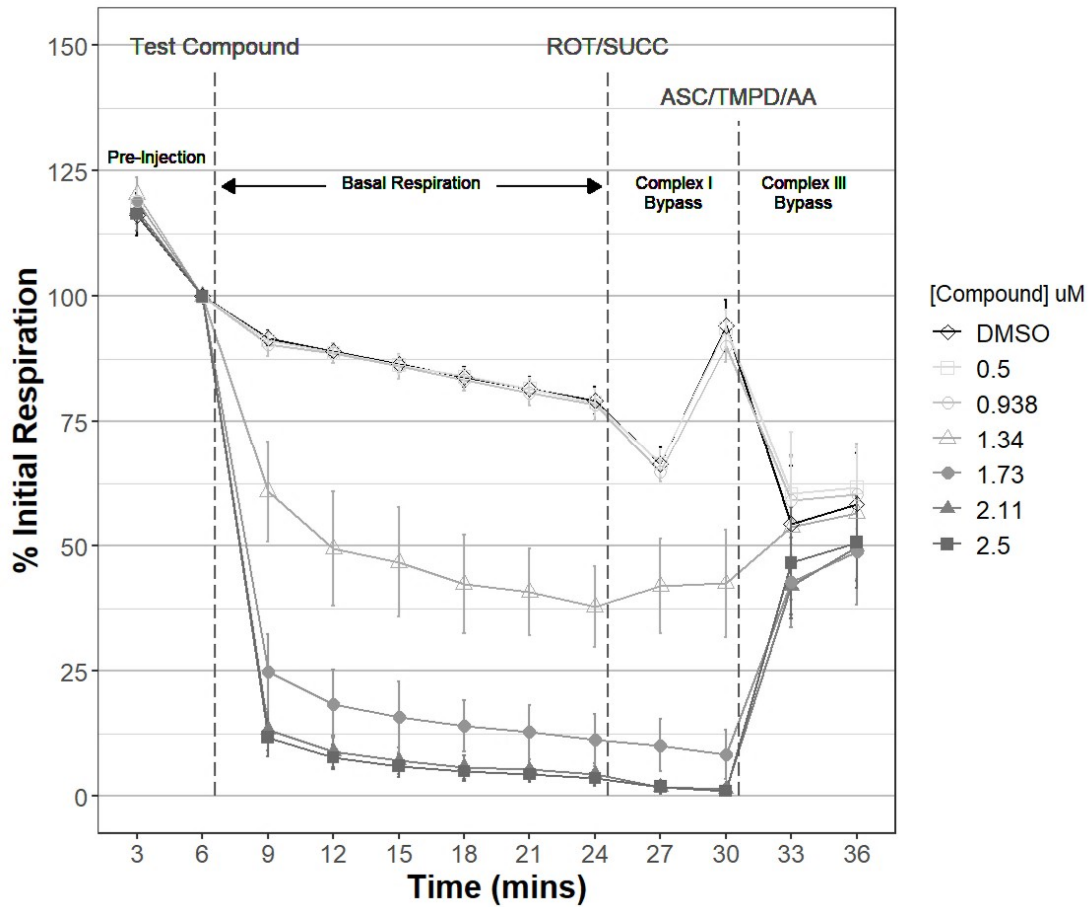

## Mercuric chloride

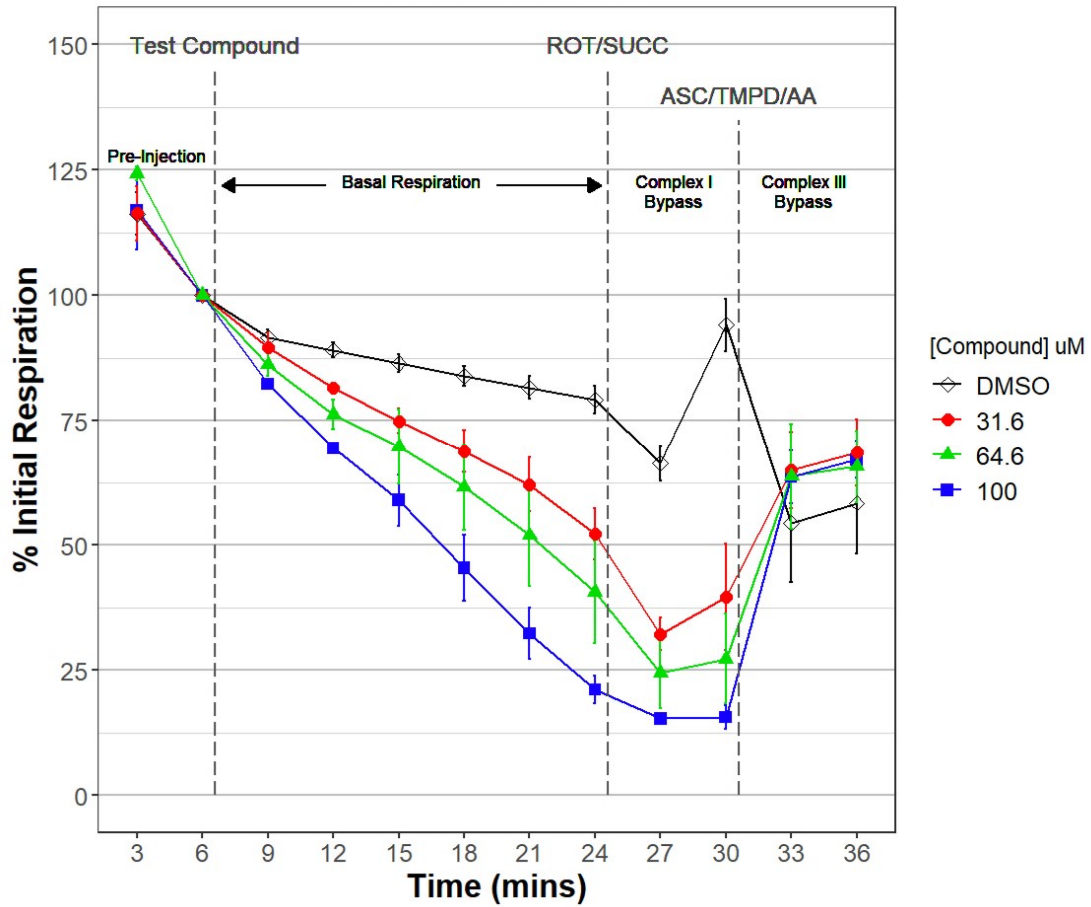

## Methylene bis(thiocyanate)

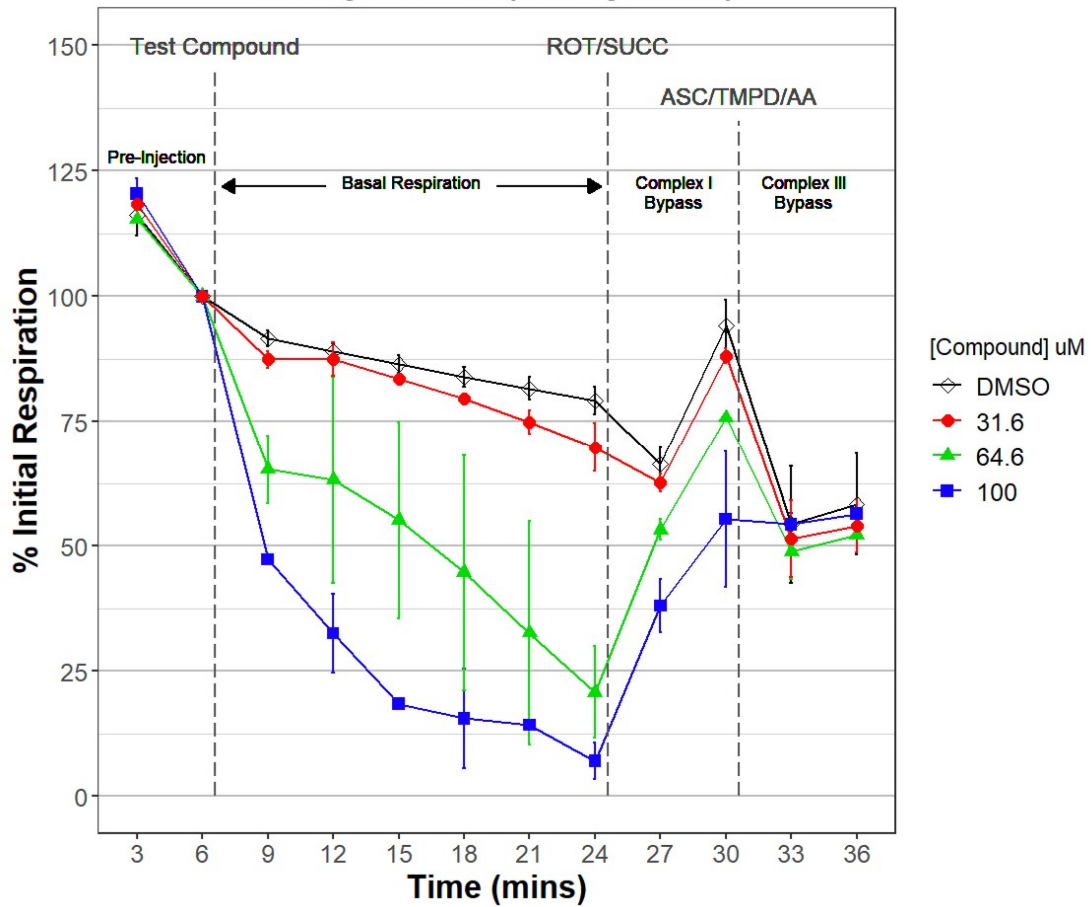

## Metolachlor

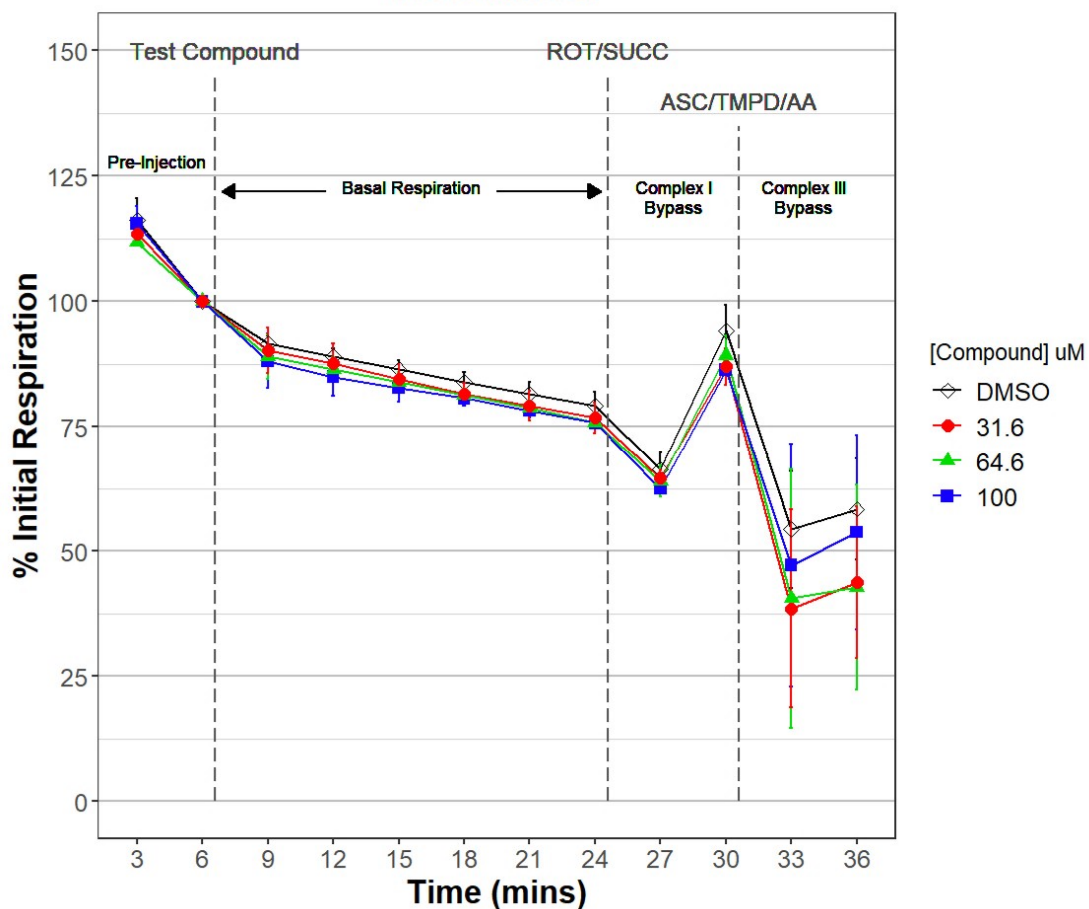

## Milbemectin (mixture of 70% Milbemcin A4, 30% Milbemycin A3)

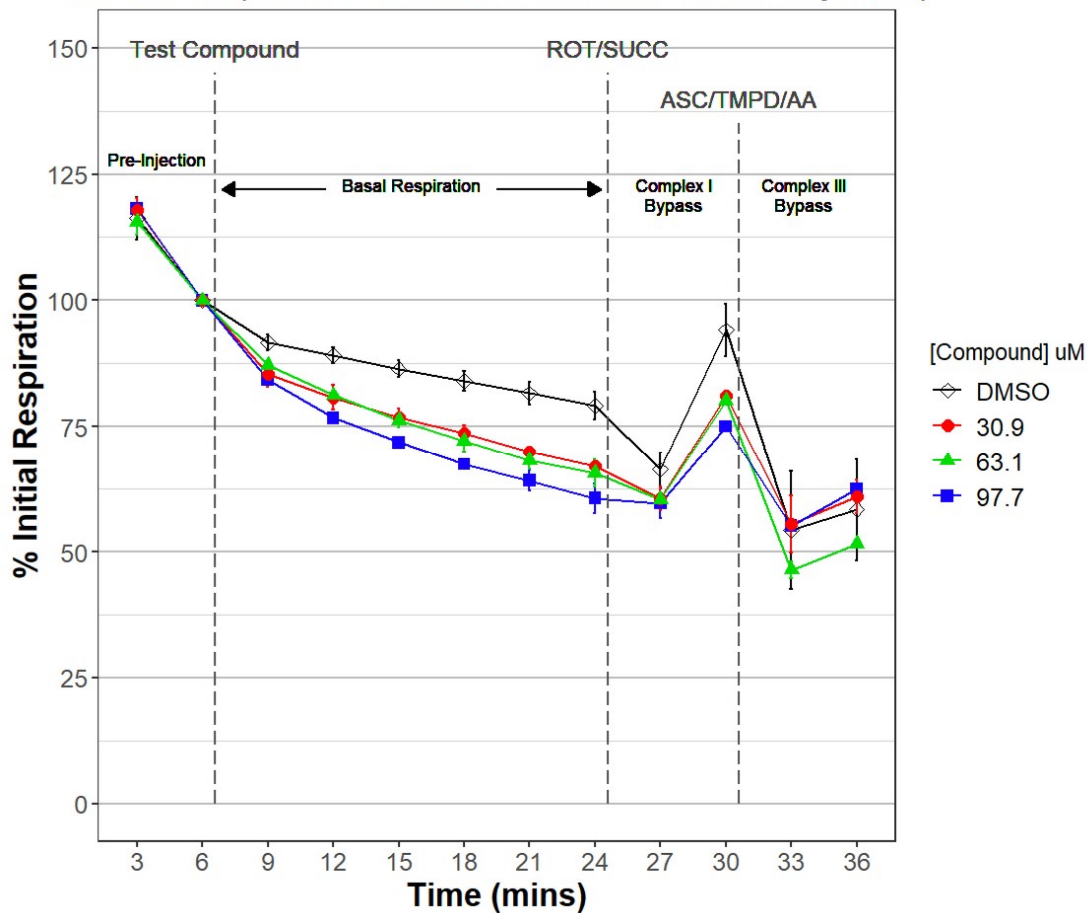

## Octhilinone

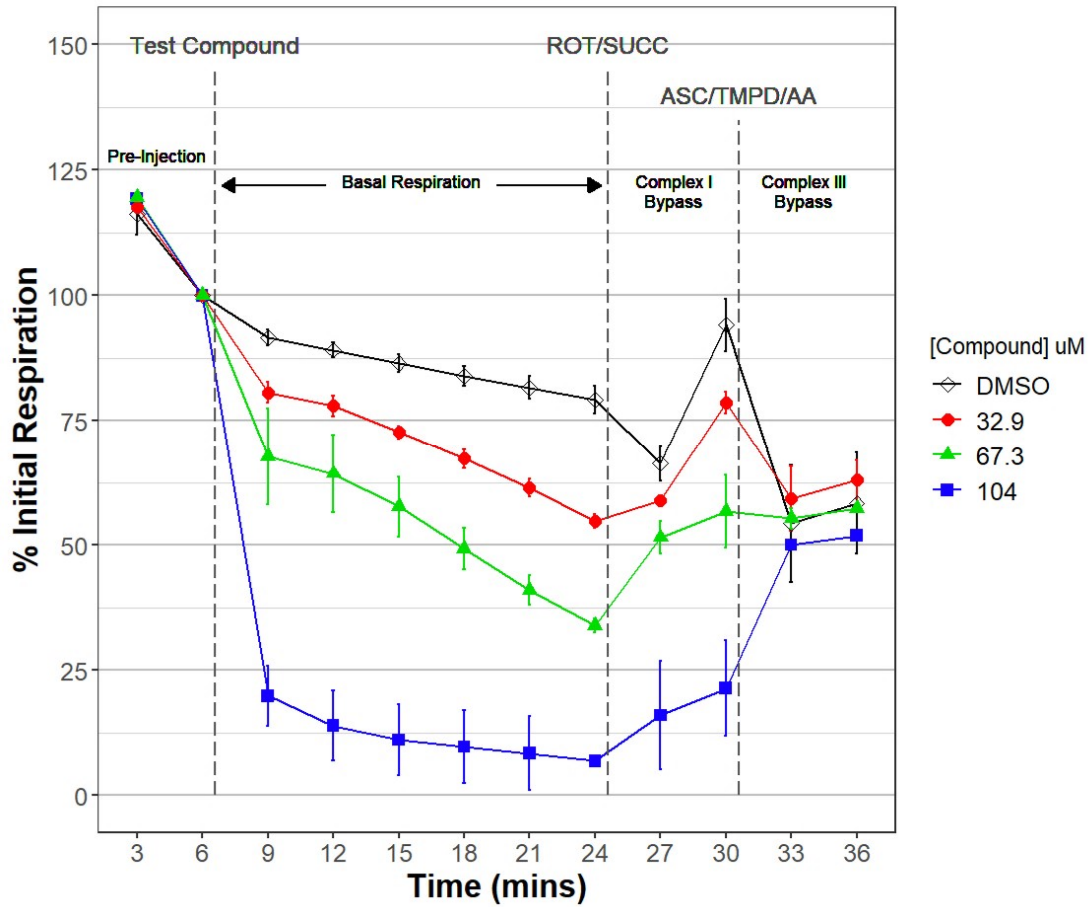

## Octyl gallate

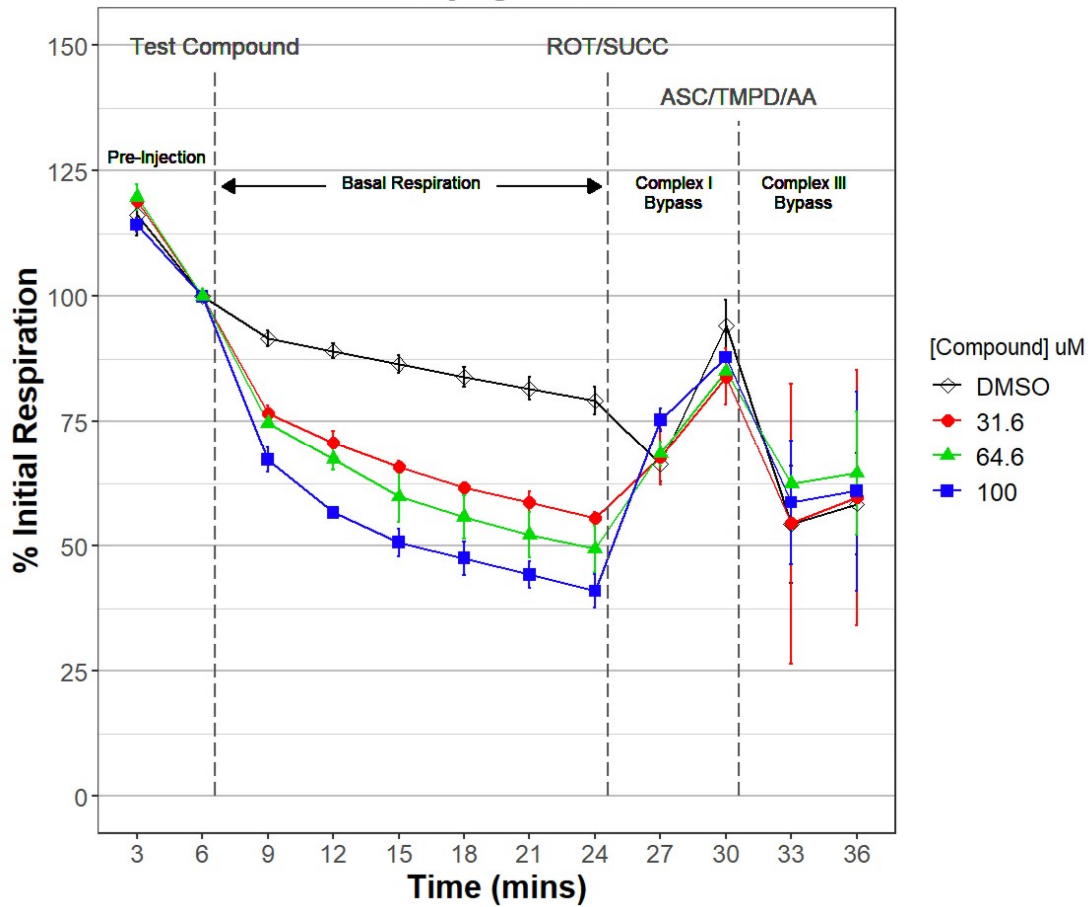



## Octylbicycloheptenedicarboximide

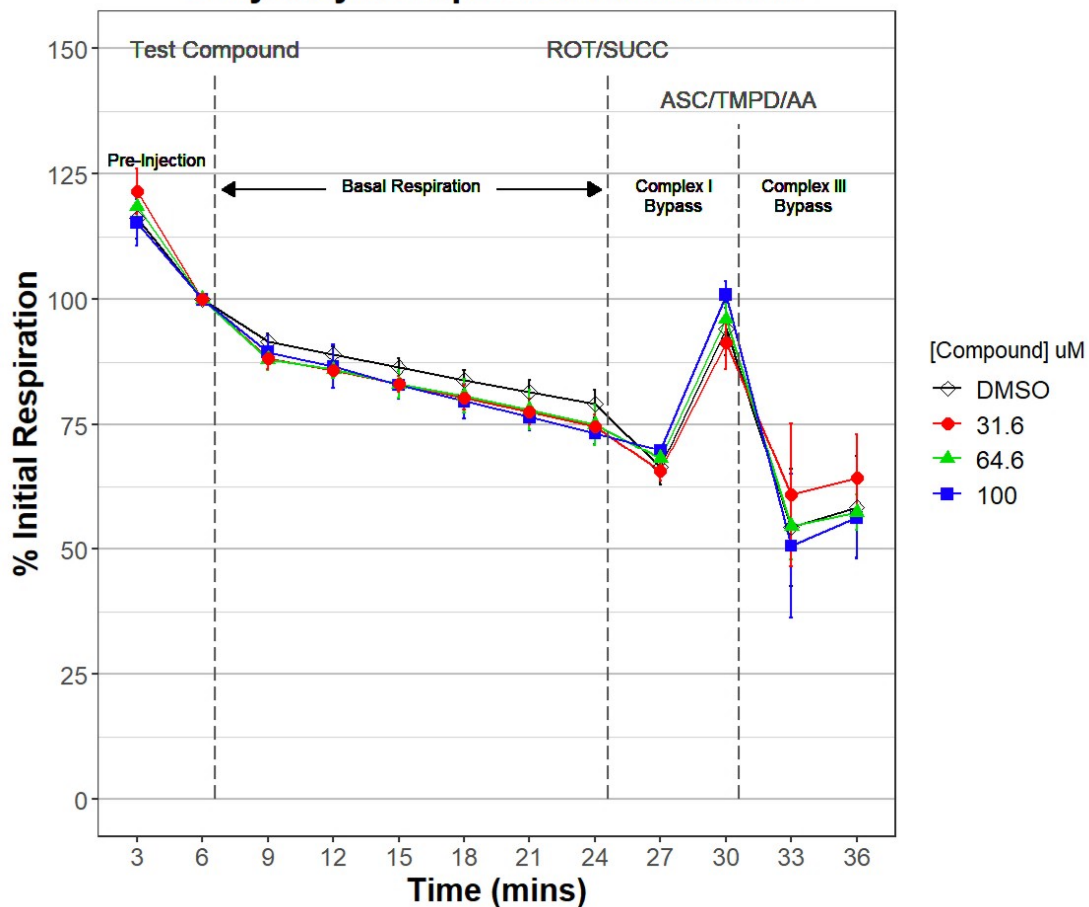

## Oryzalin

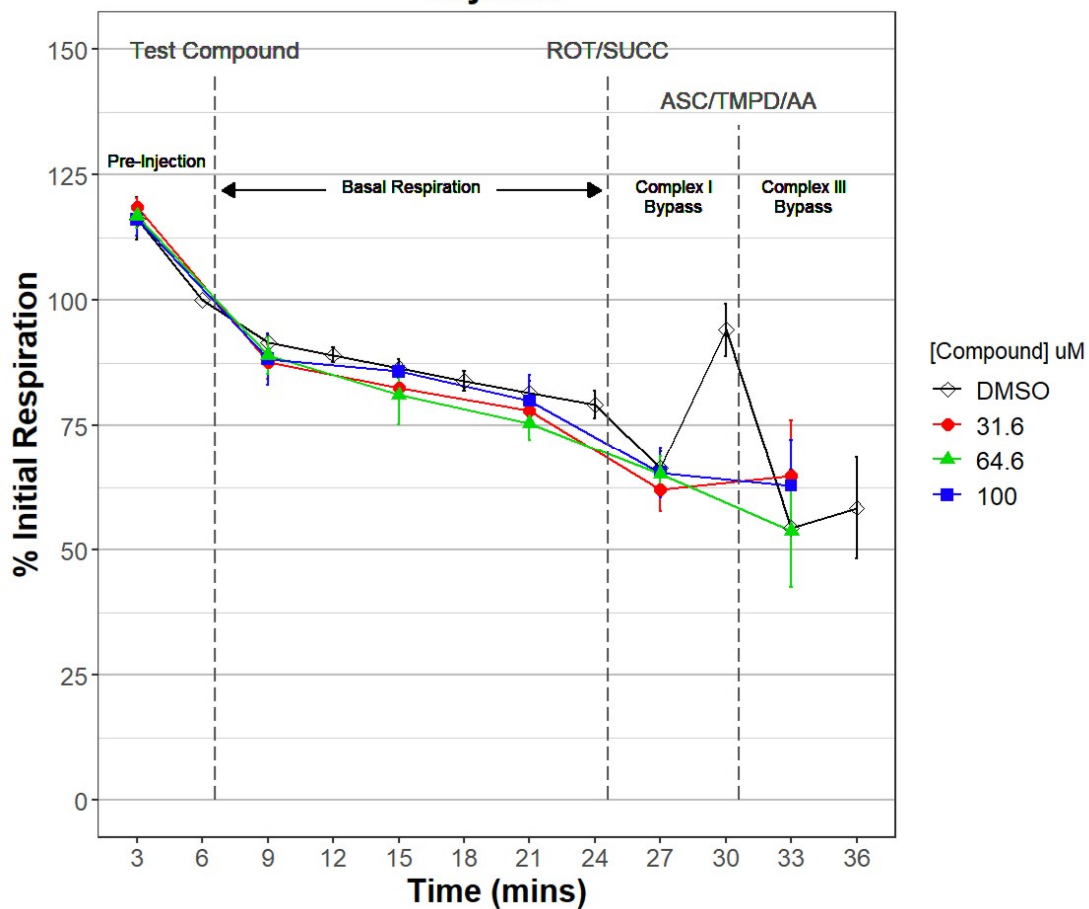

### PD 0343701

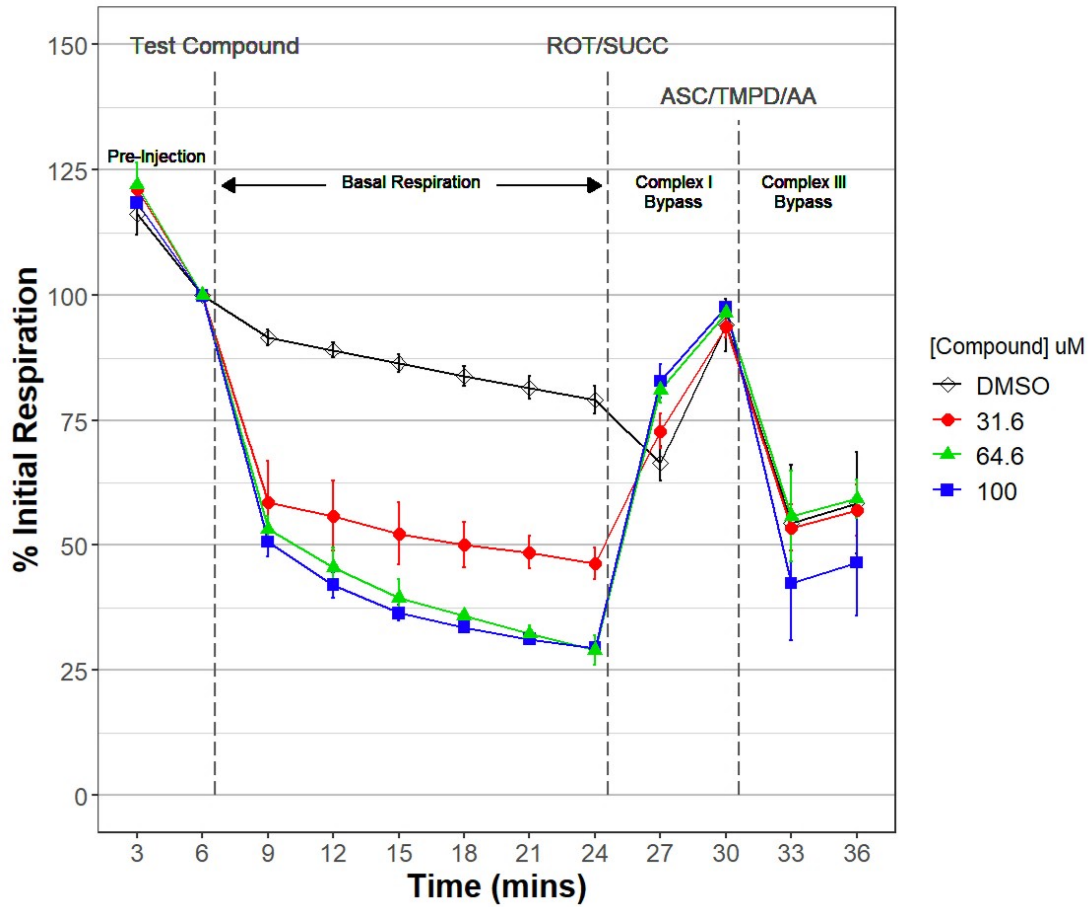

### PD-0333941

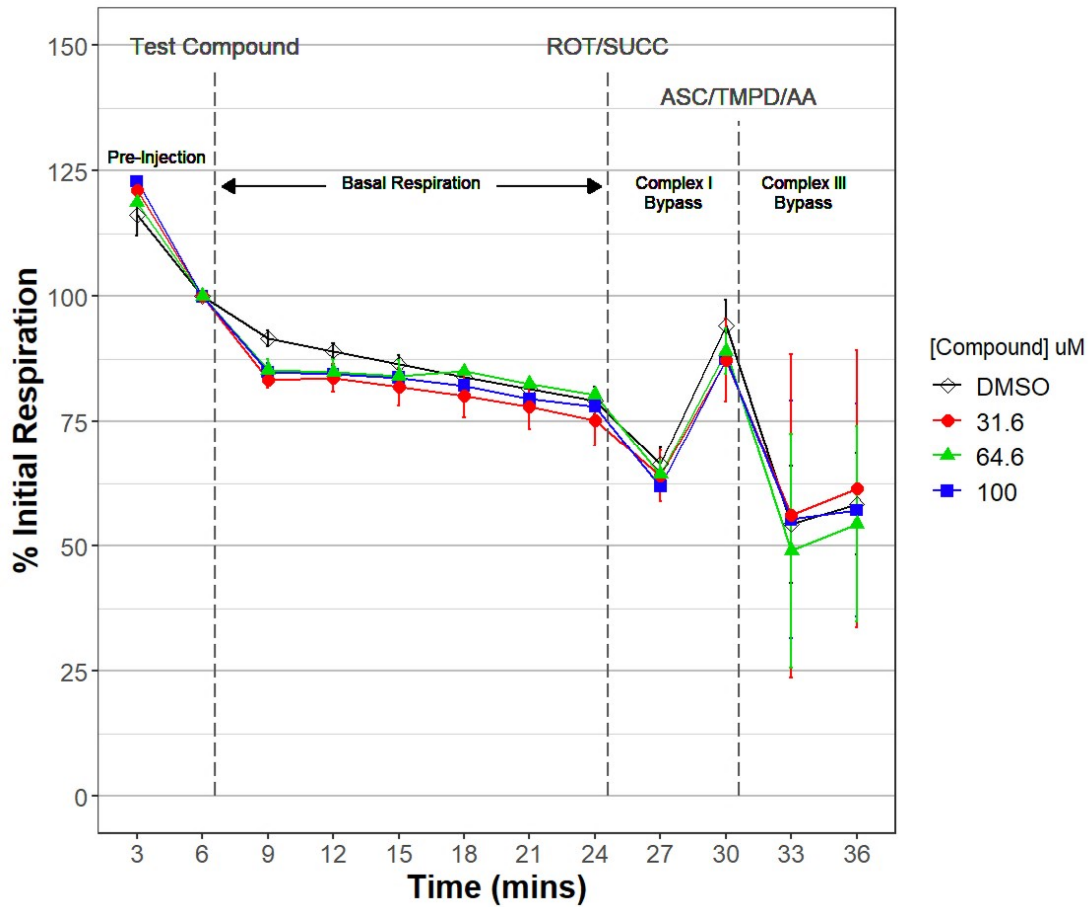

## Pendimethalin

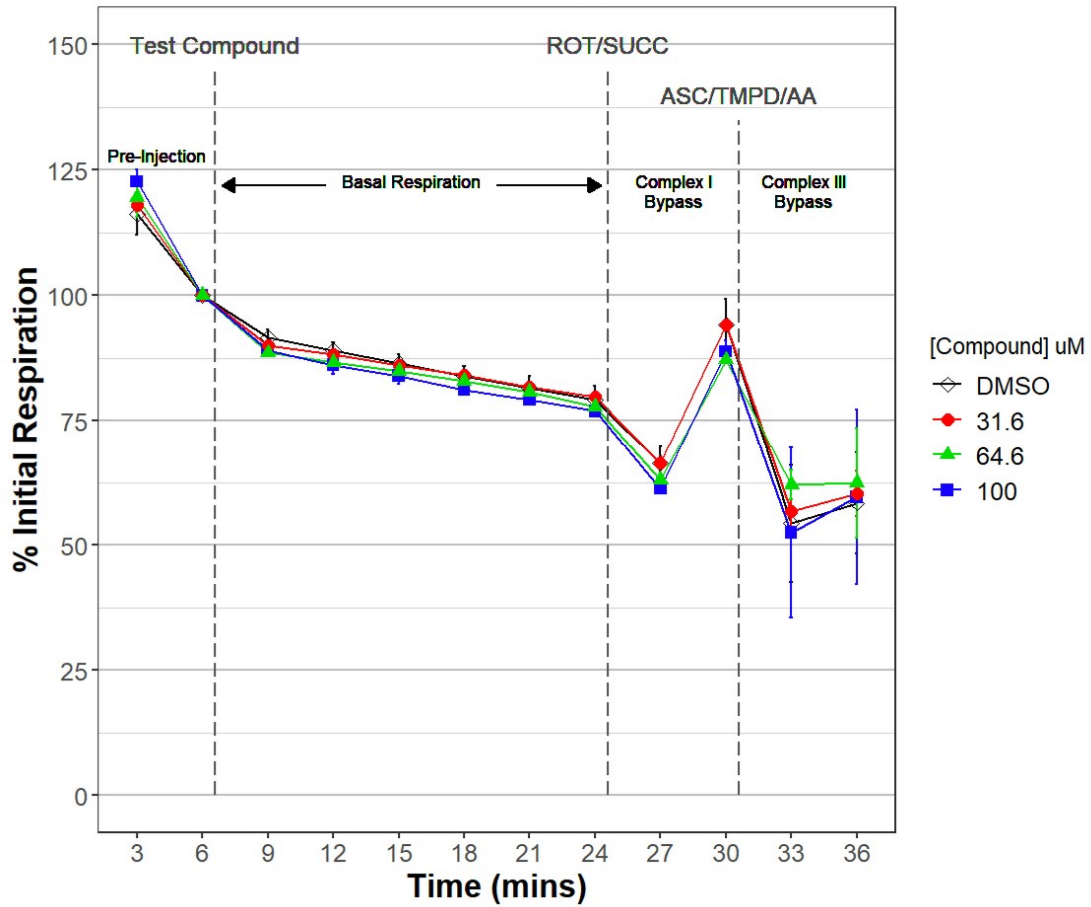

## PharmaGSID\_48172

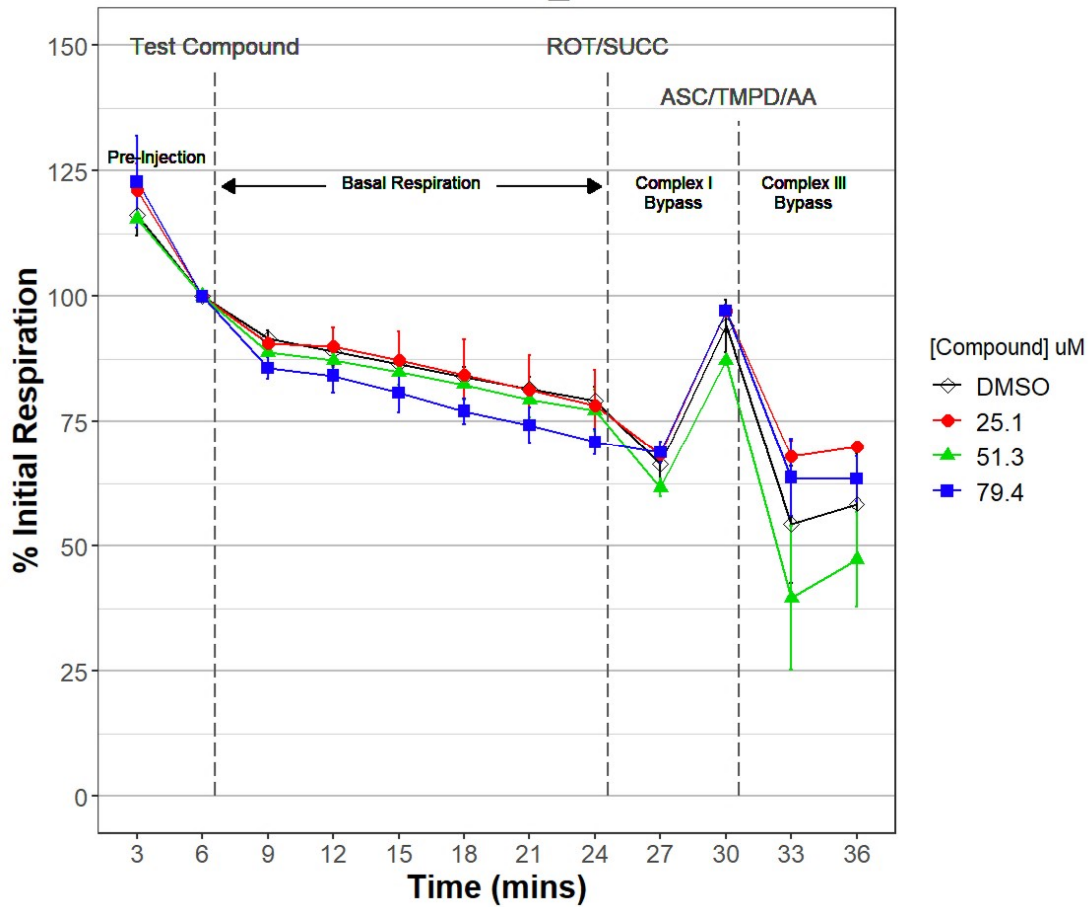

### PharmaGSID\_48514

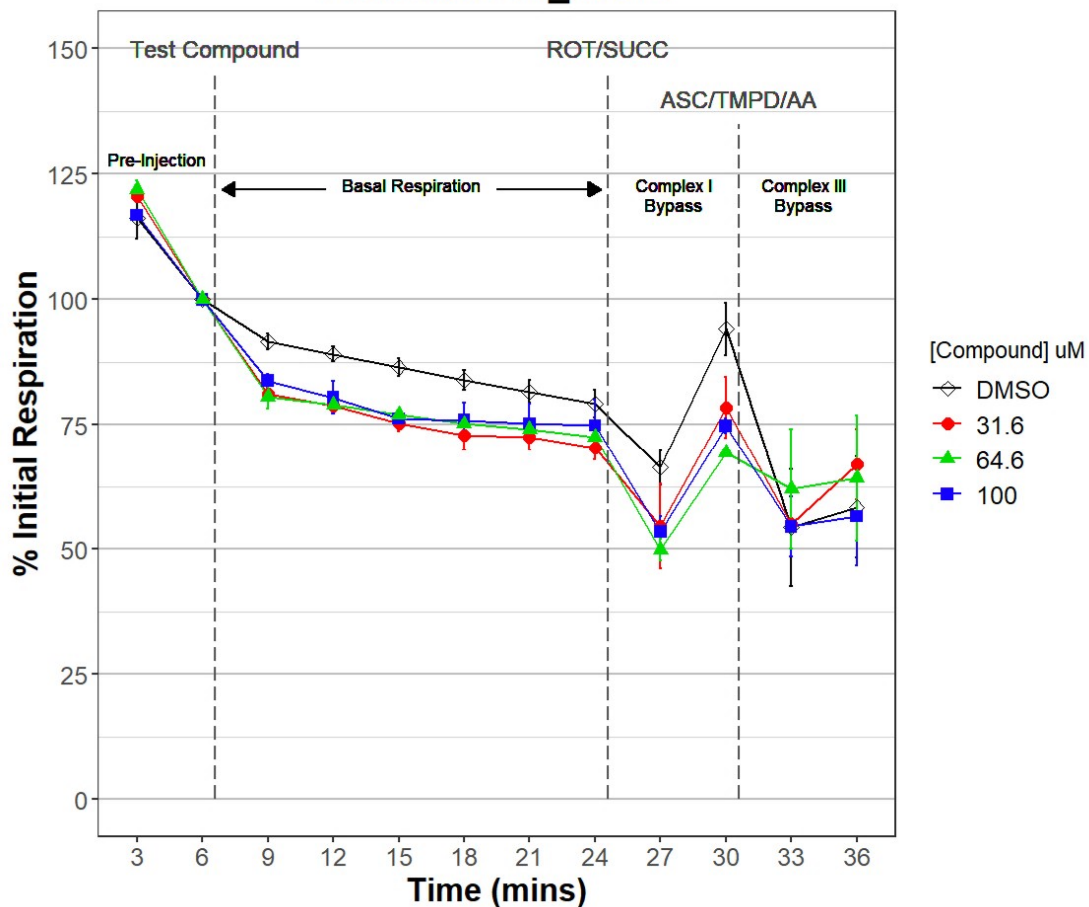

### PharmaGSID\_48519

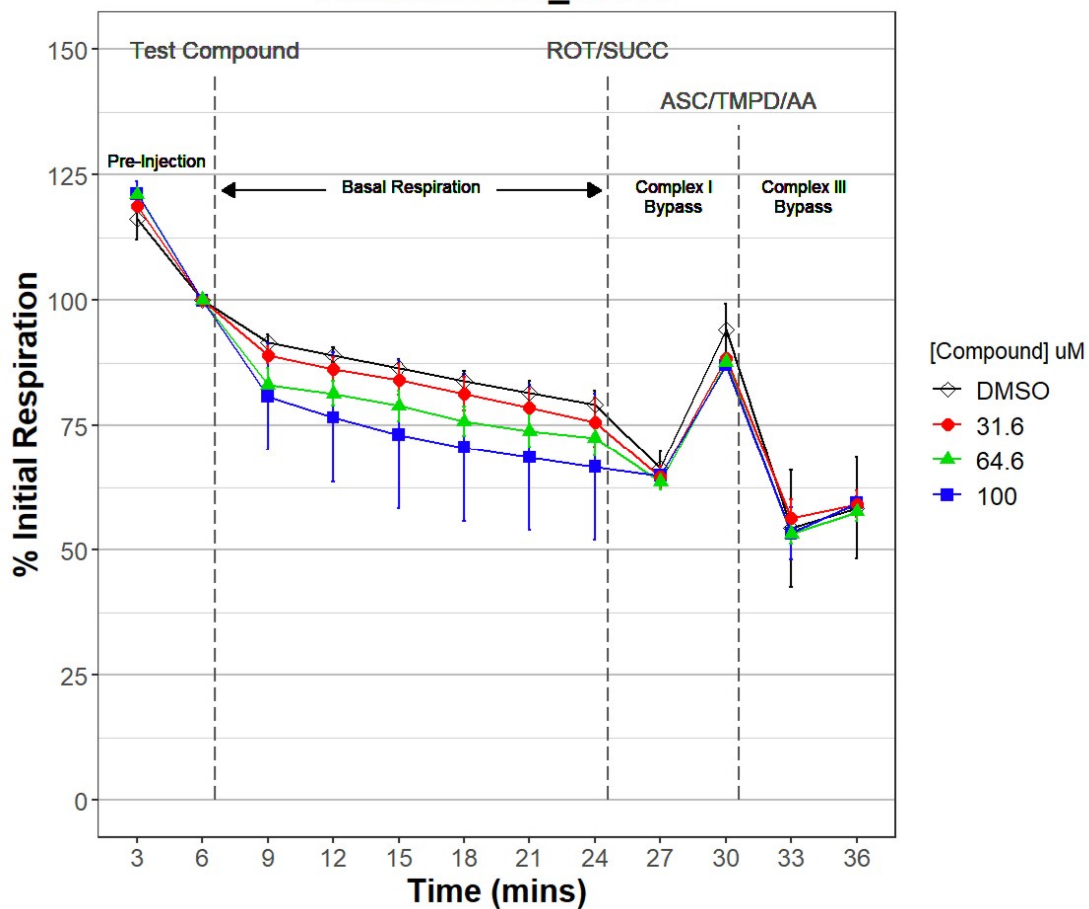

## Phenolphthalein

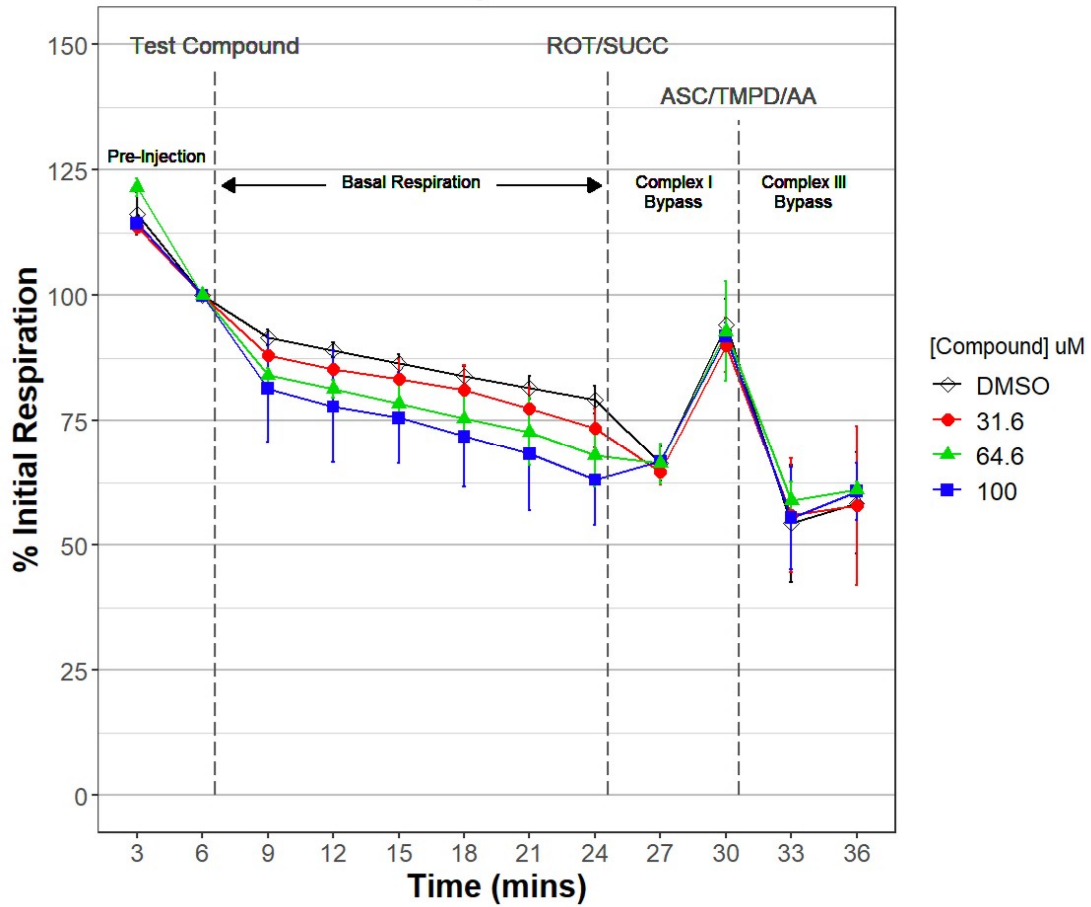

## Phenylmercuric acetate

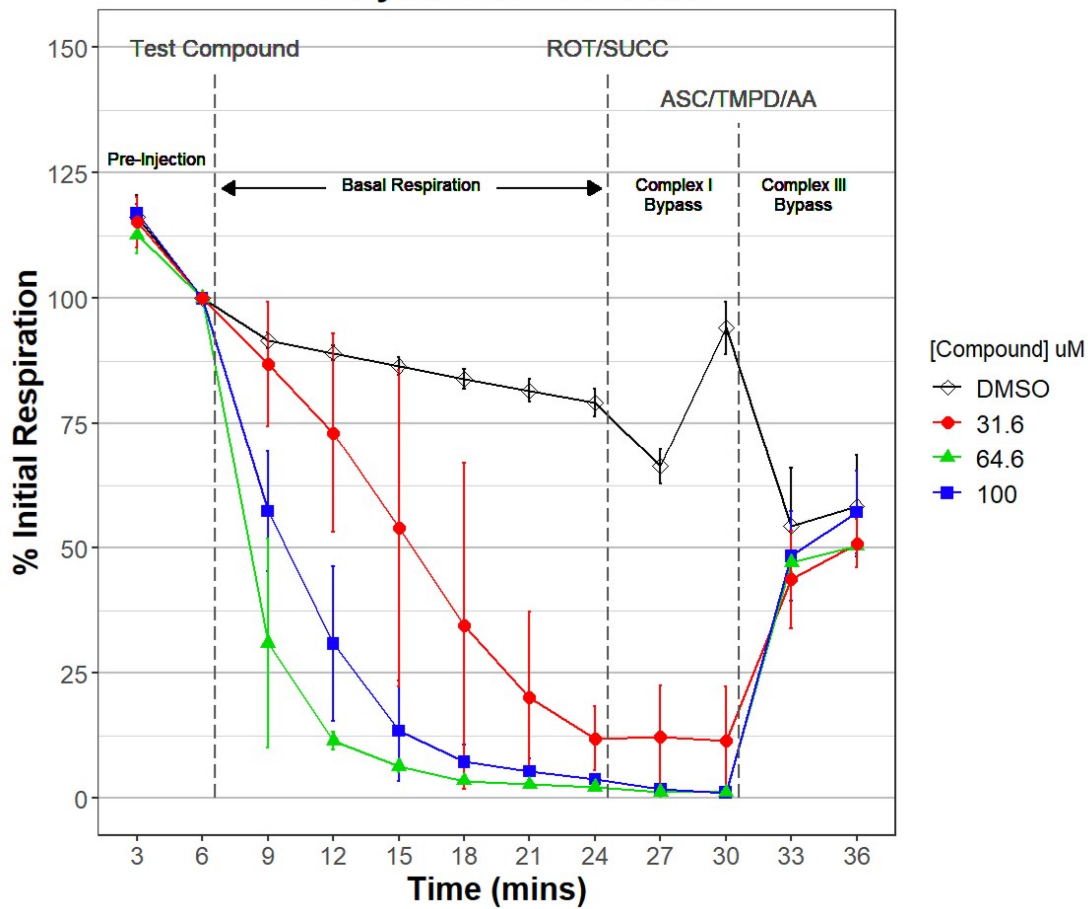



## Phorate

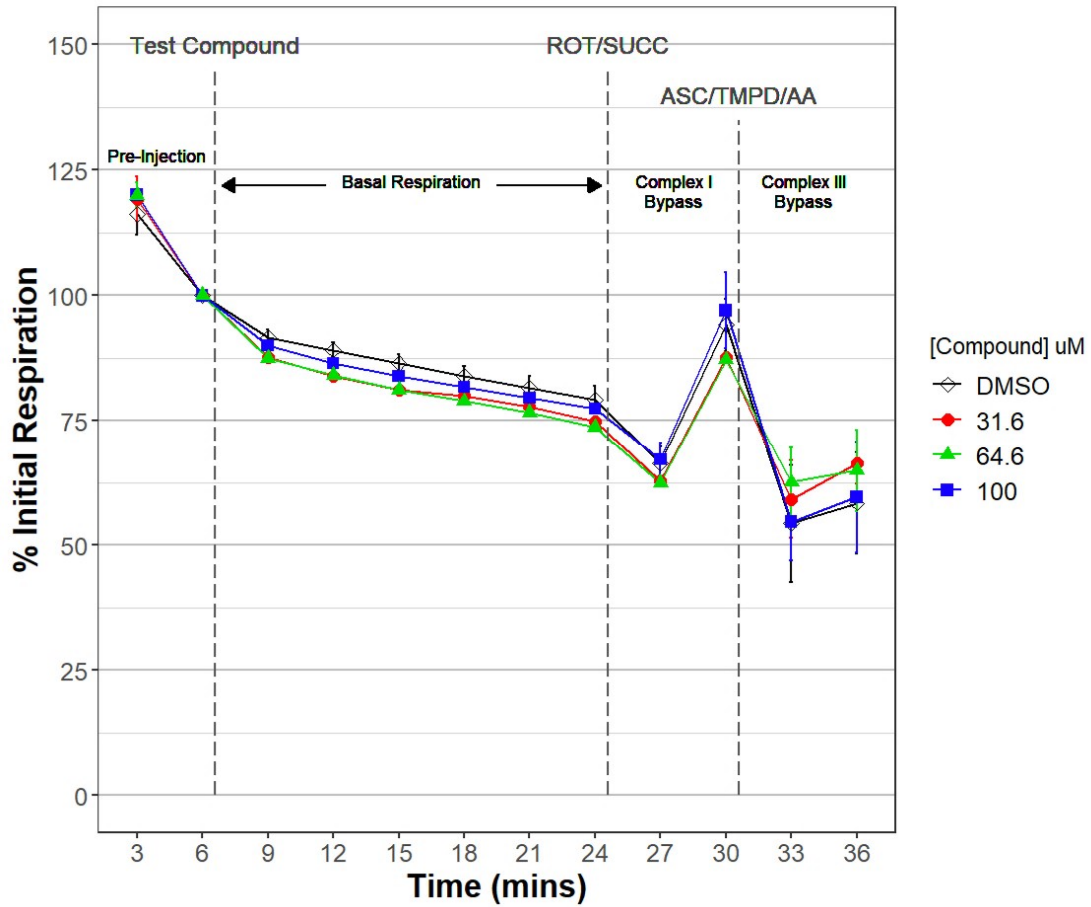

## Picoxystrobin

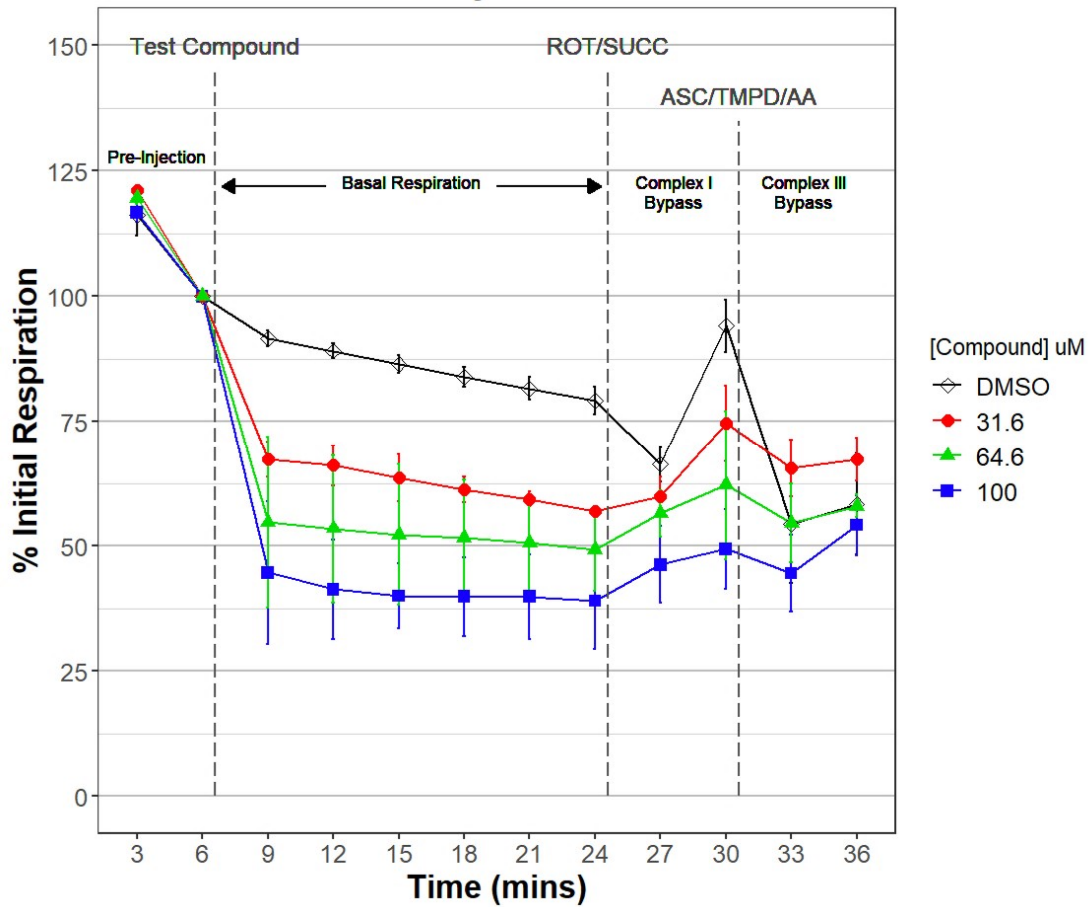

## Prallethrin

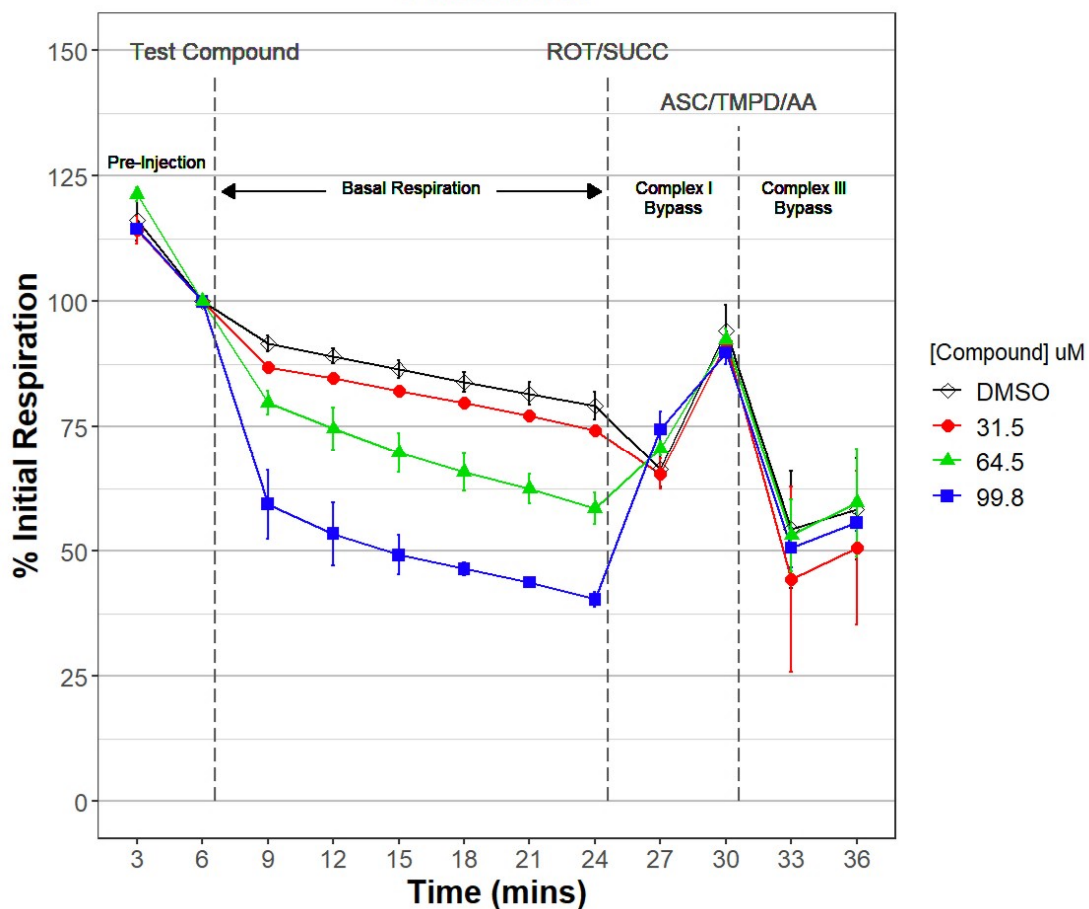

## Prochloraz

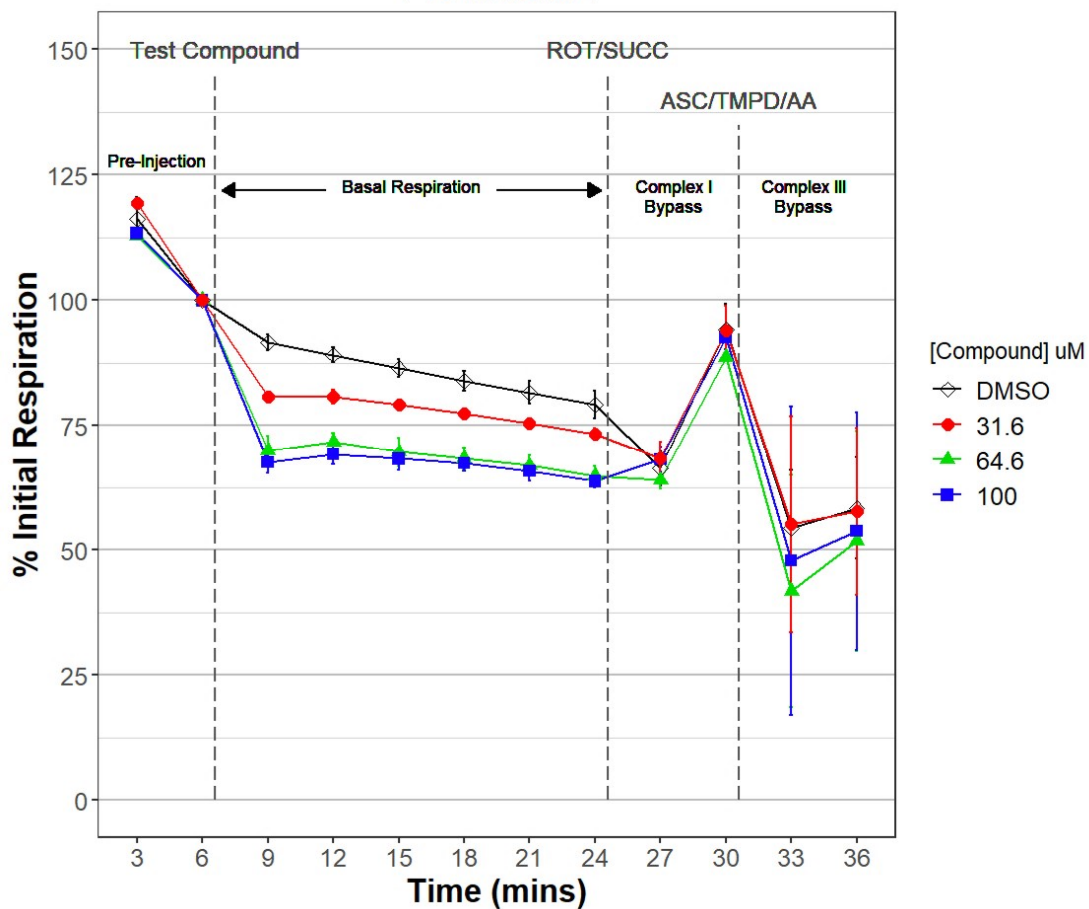

## Progesterone

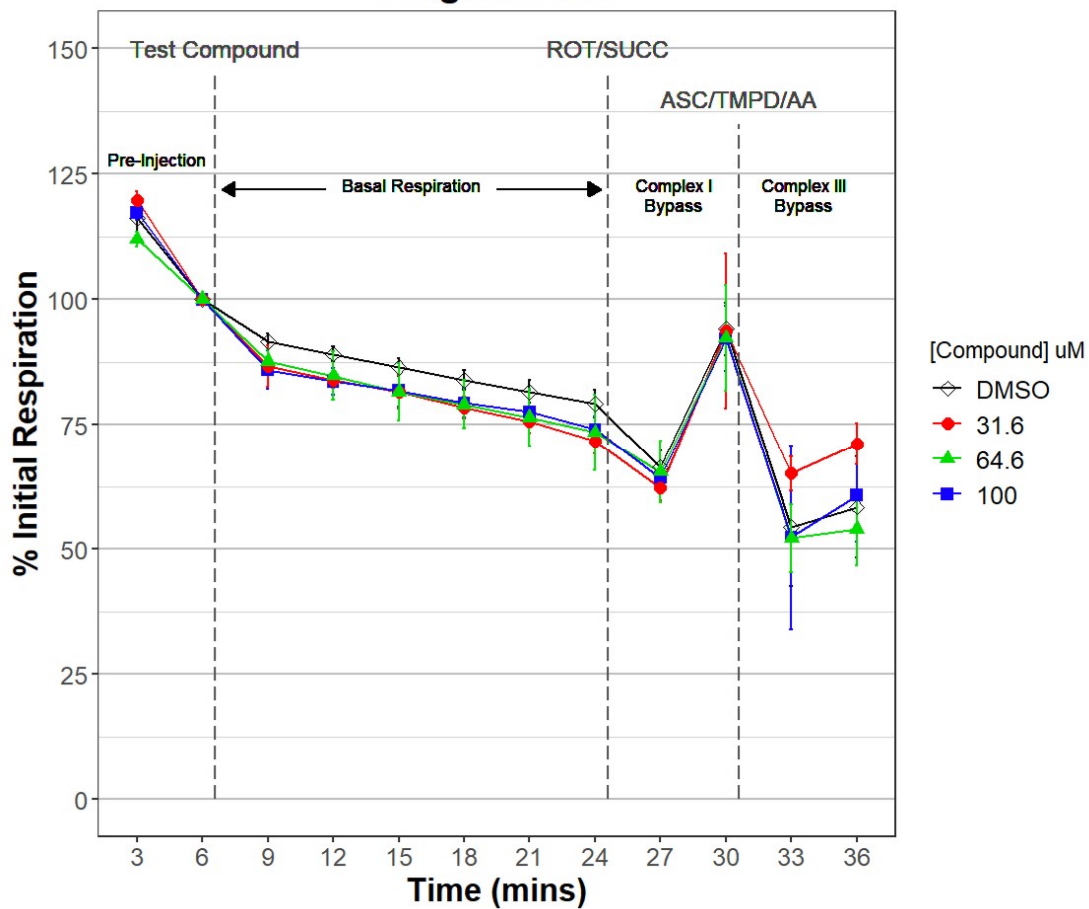

## Propanil

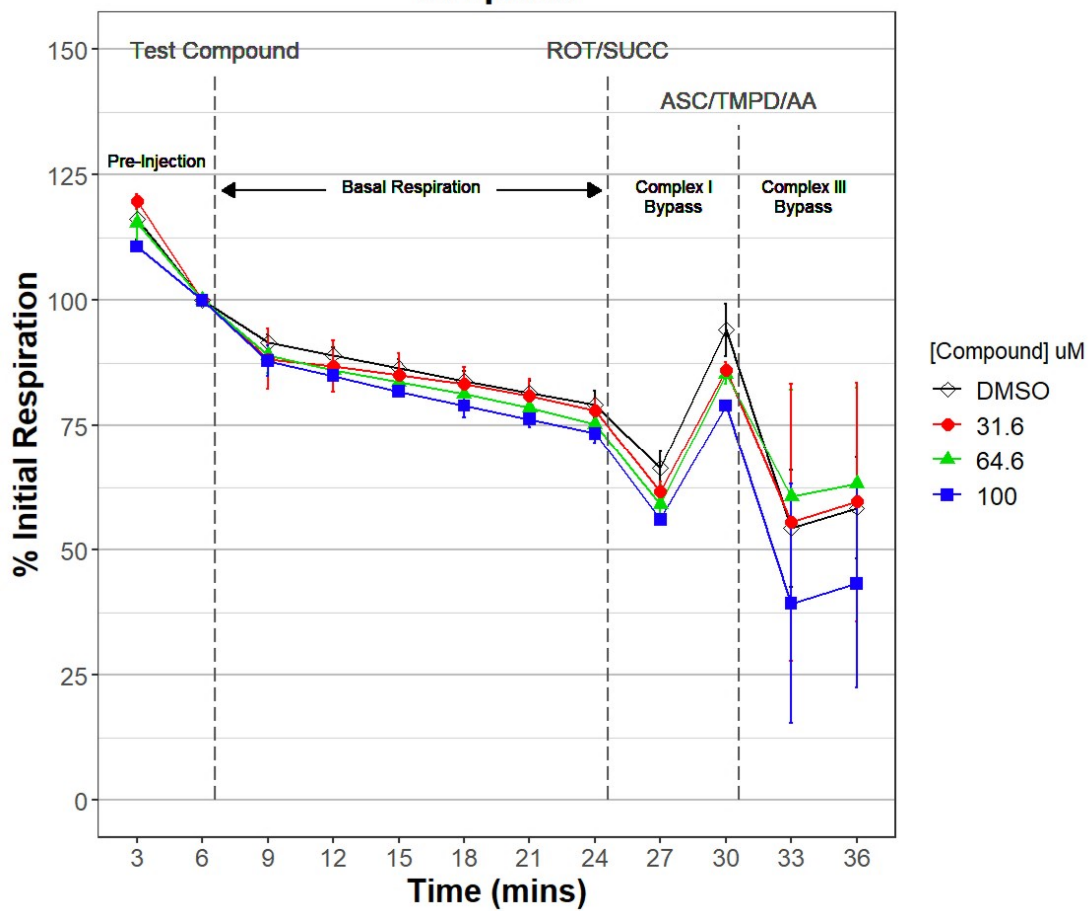

## Propargite

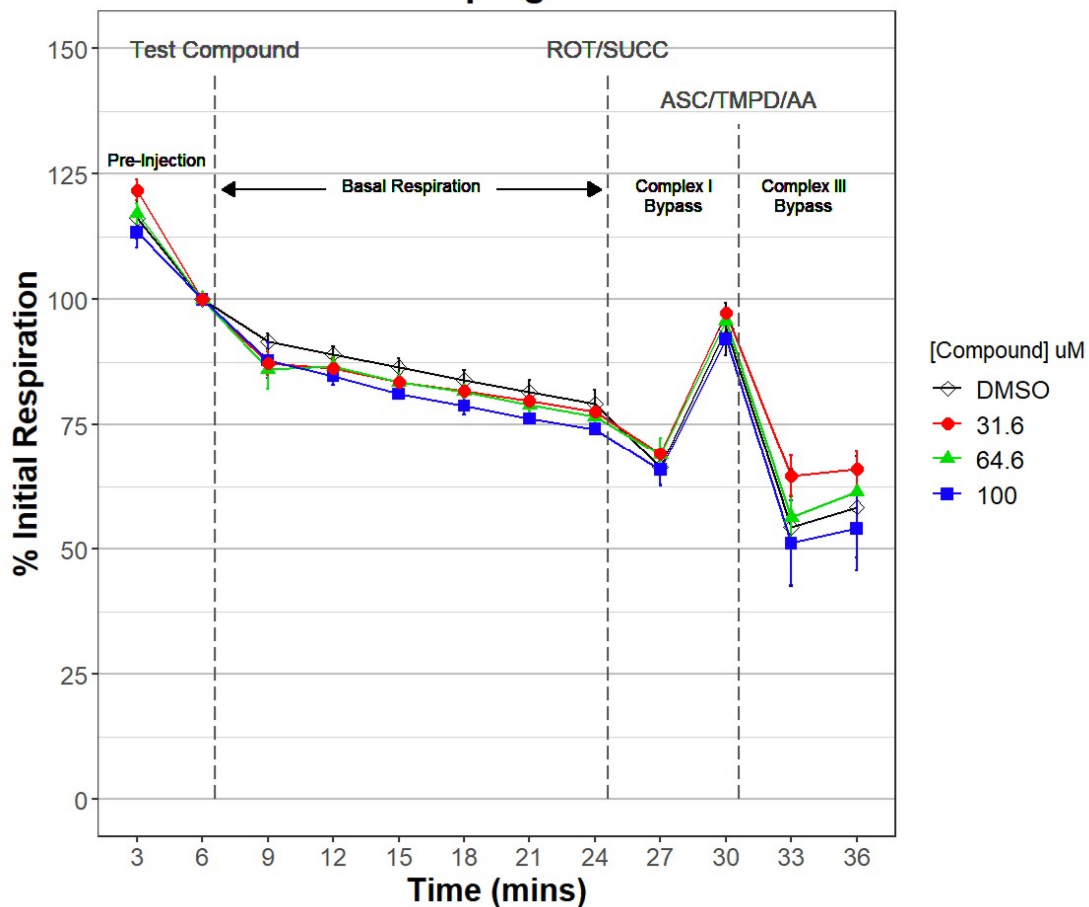

## Propetamphos

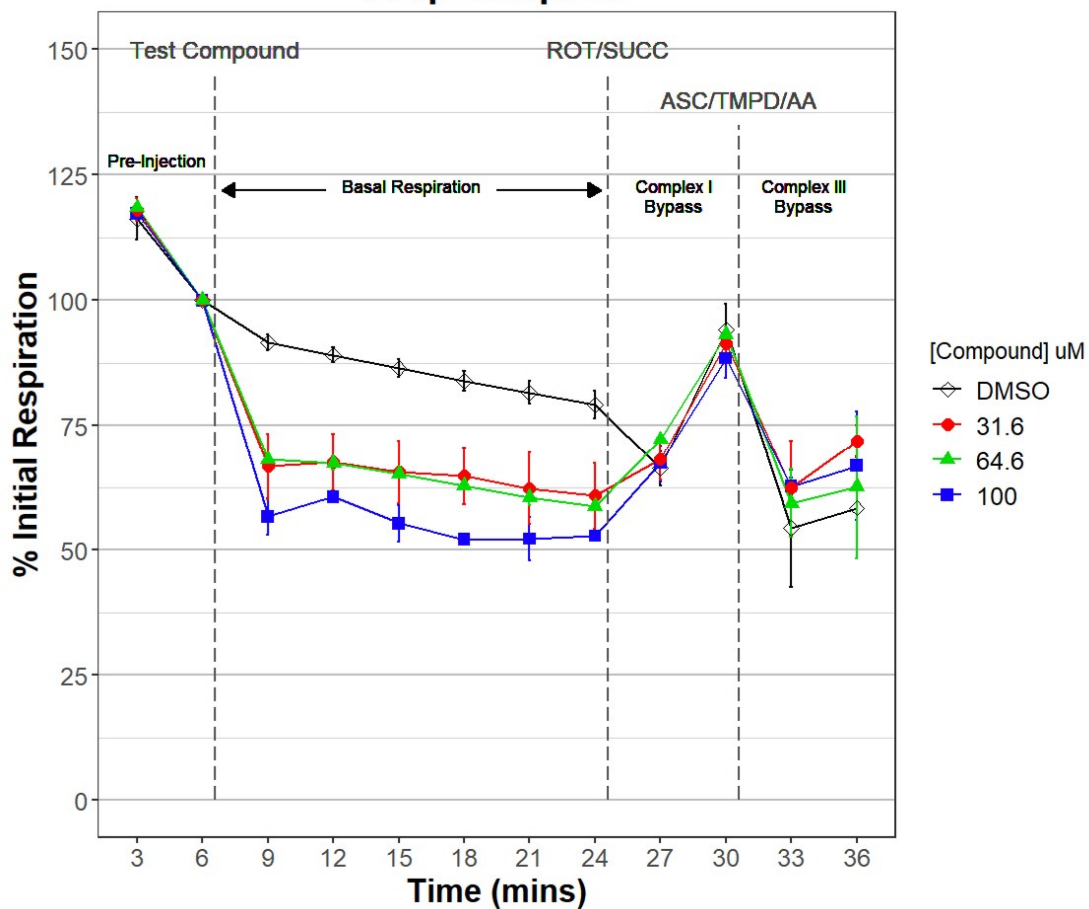

## Propiconazole

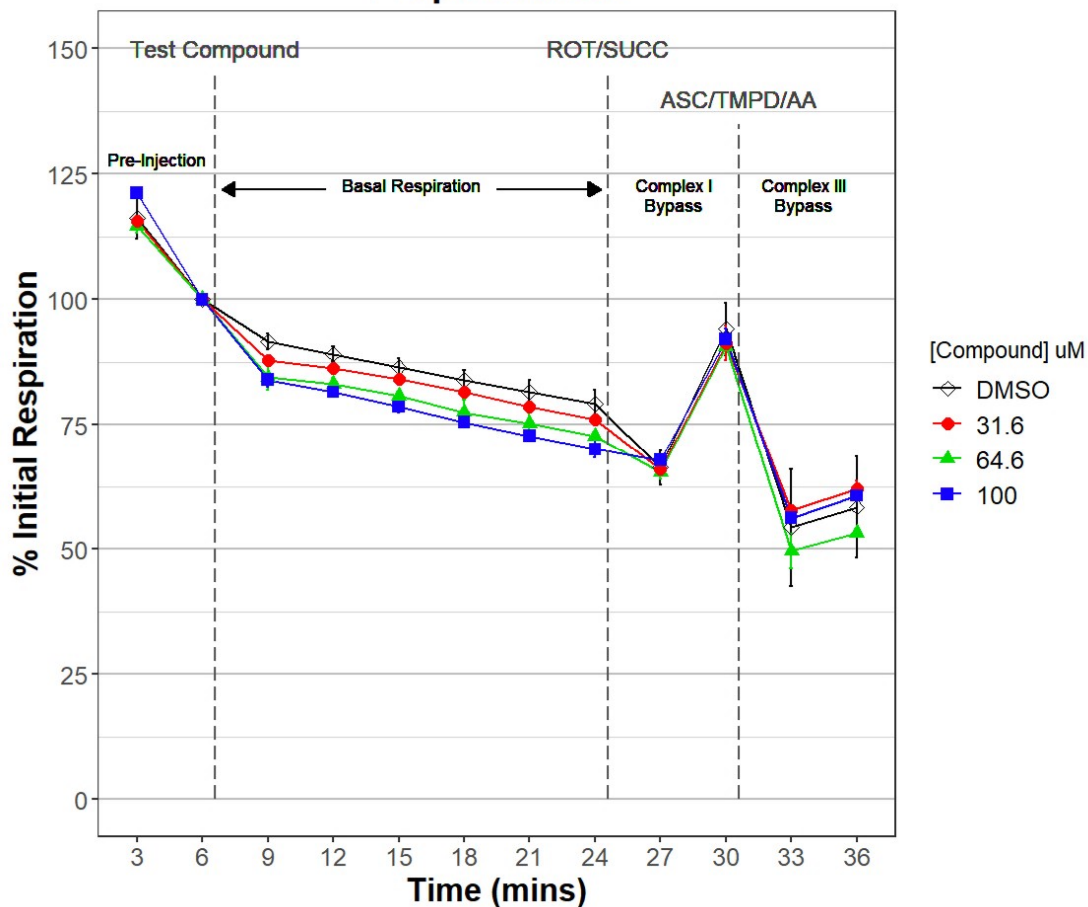

## Pyraclostrobin

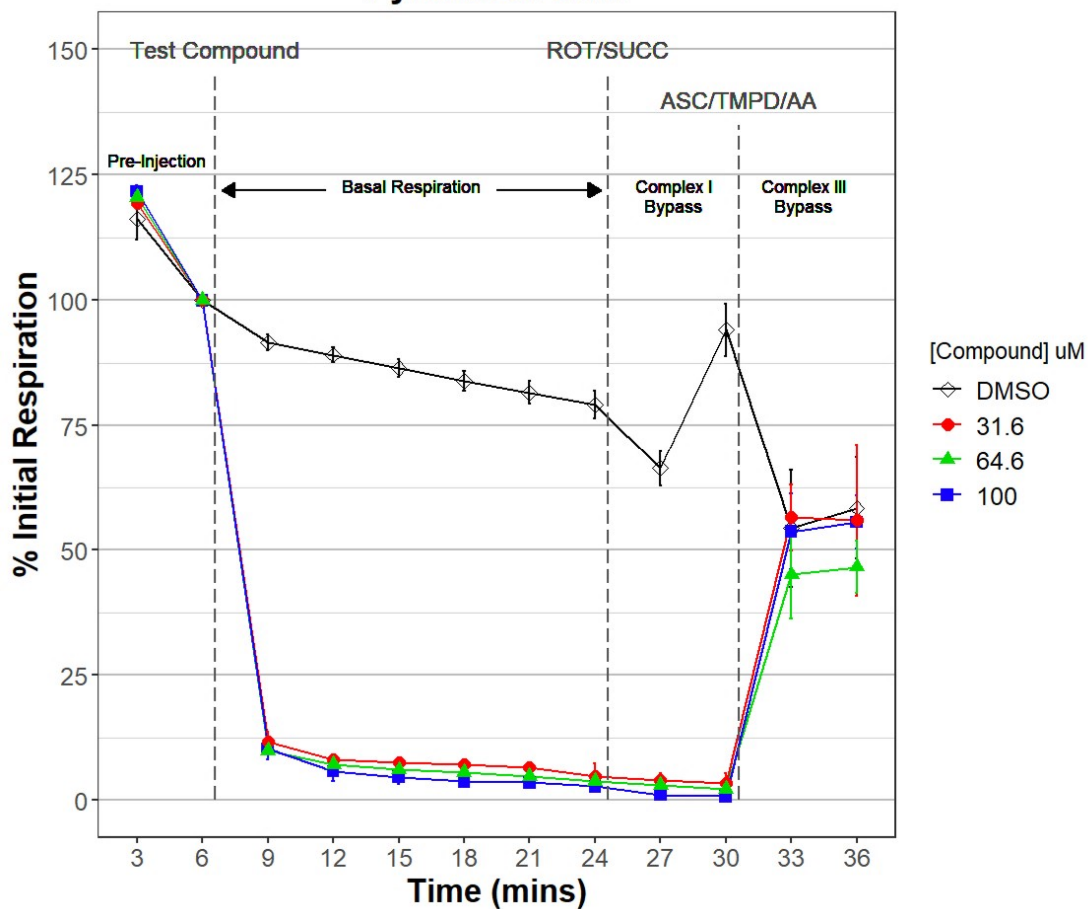



## Pyridaben

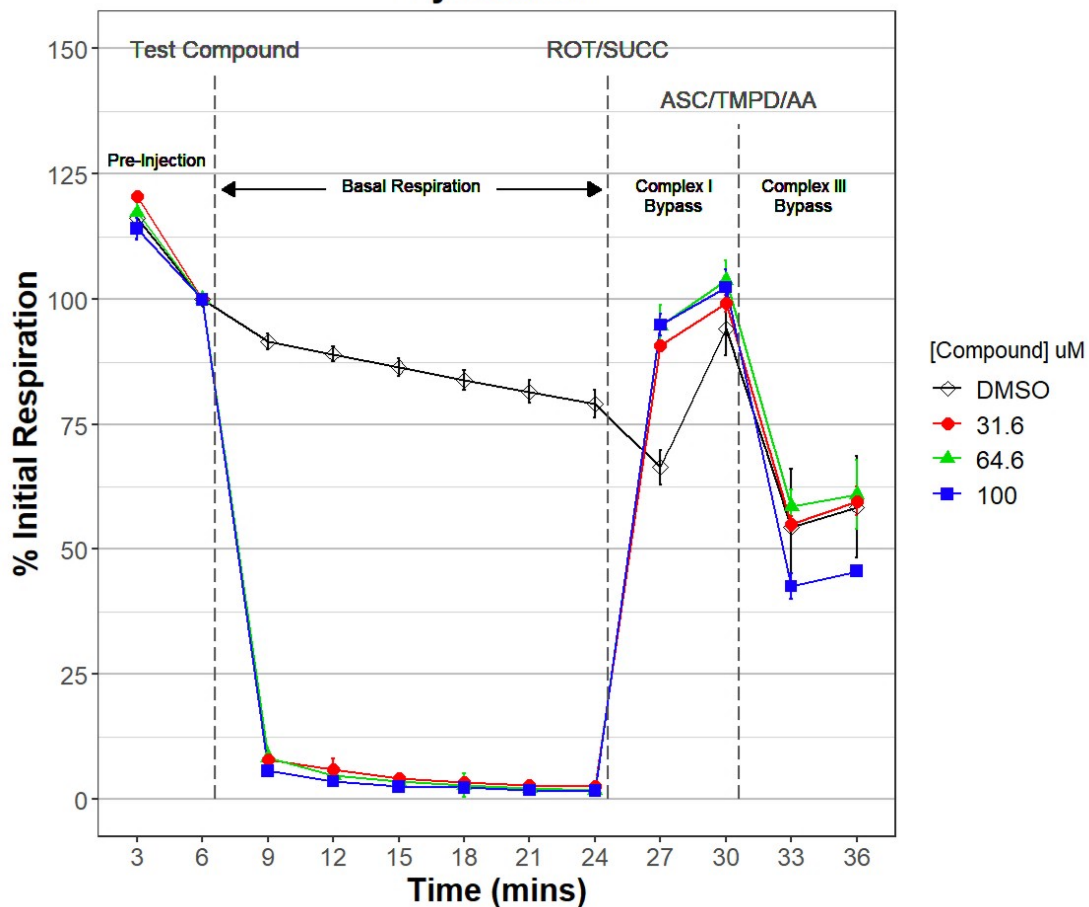

## Rotenone

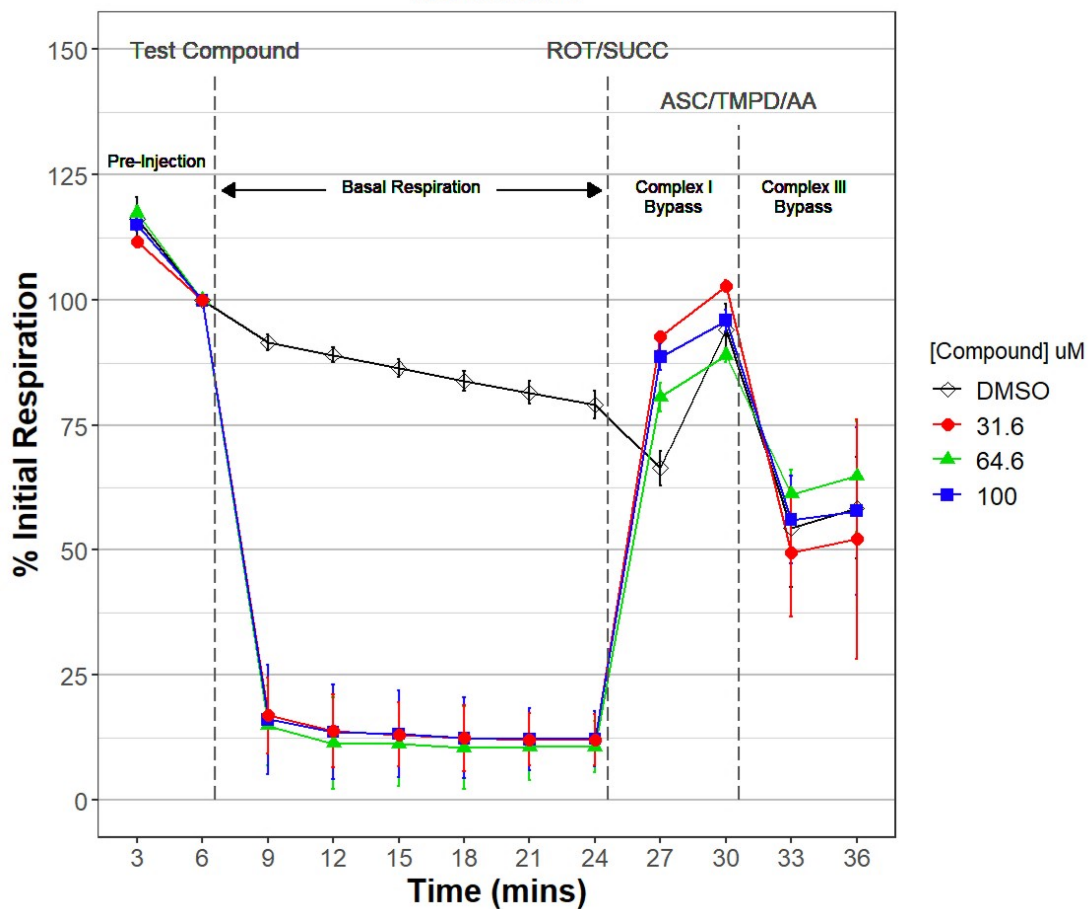

## S-Bioallethrin

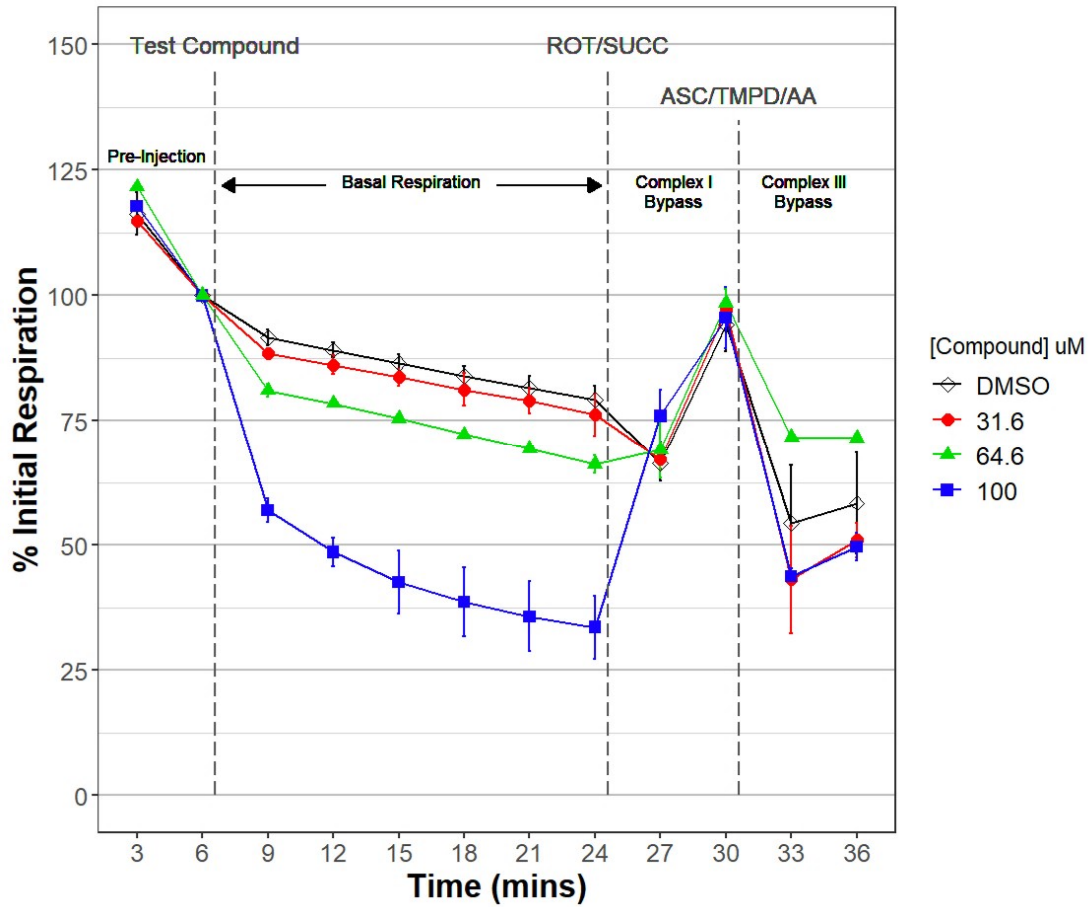

## SAR 150640

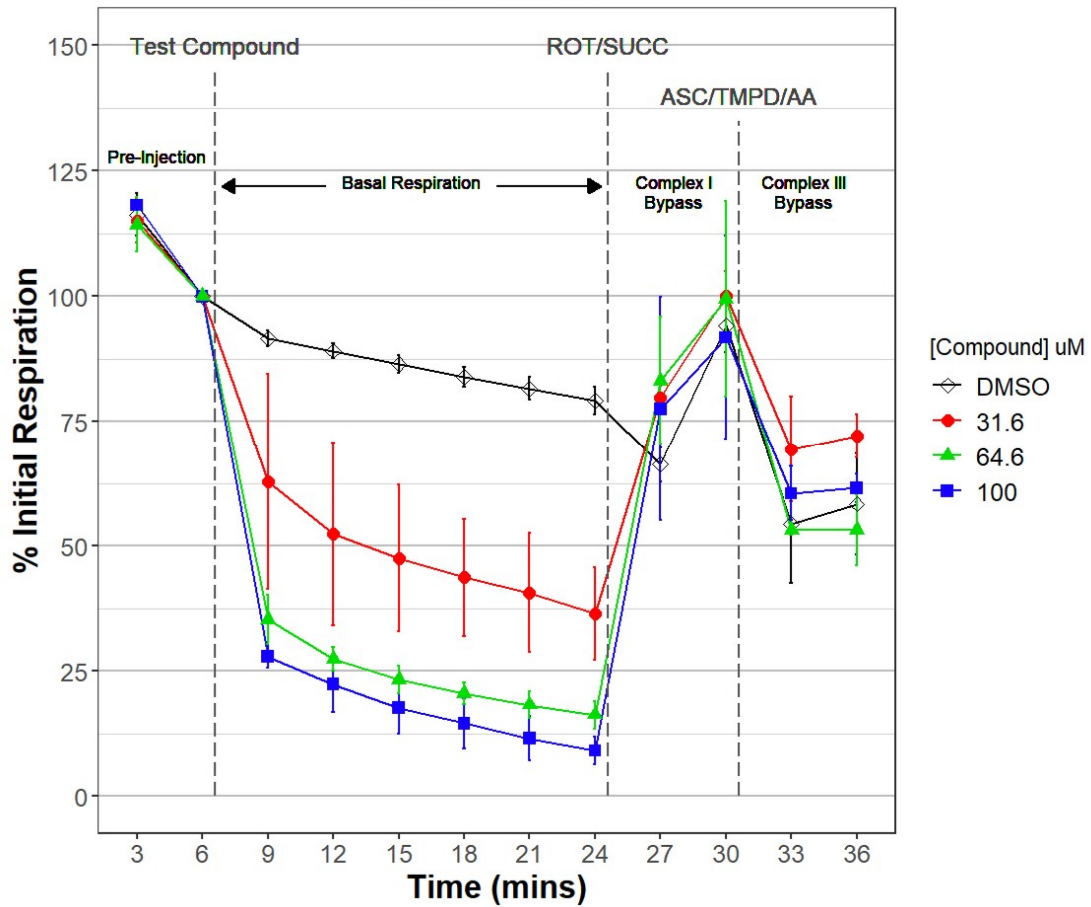

### SR125047

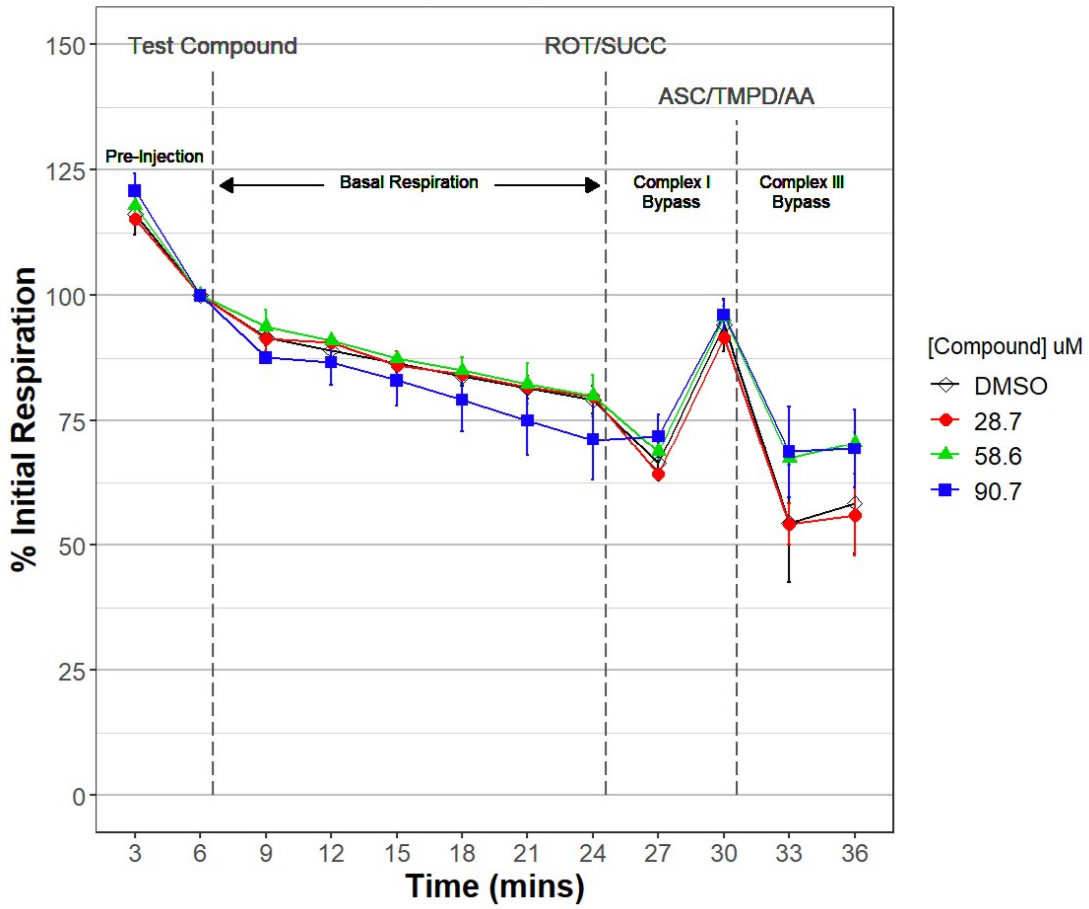

### SR58611

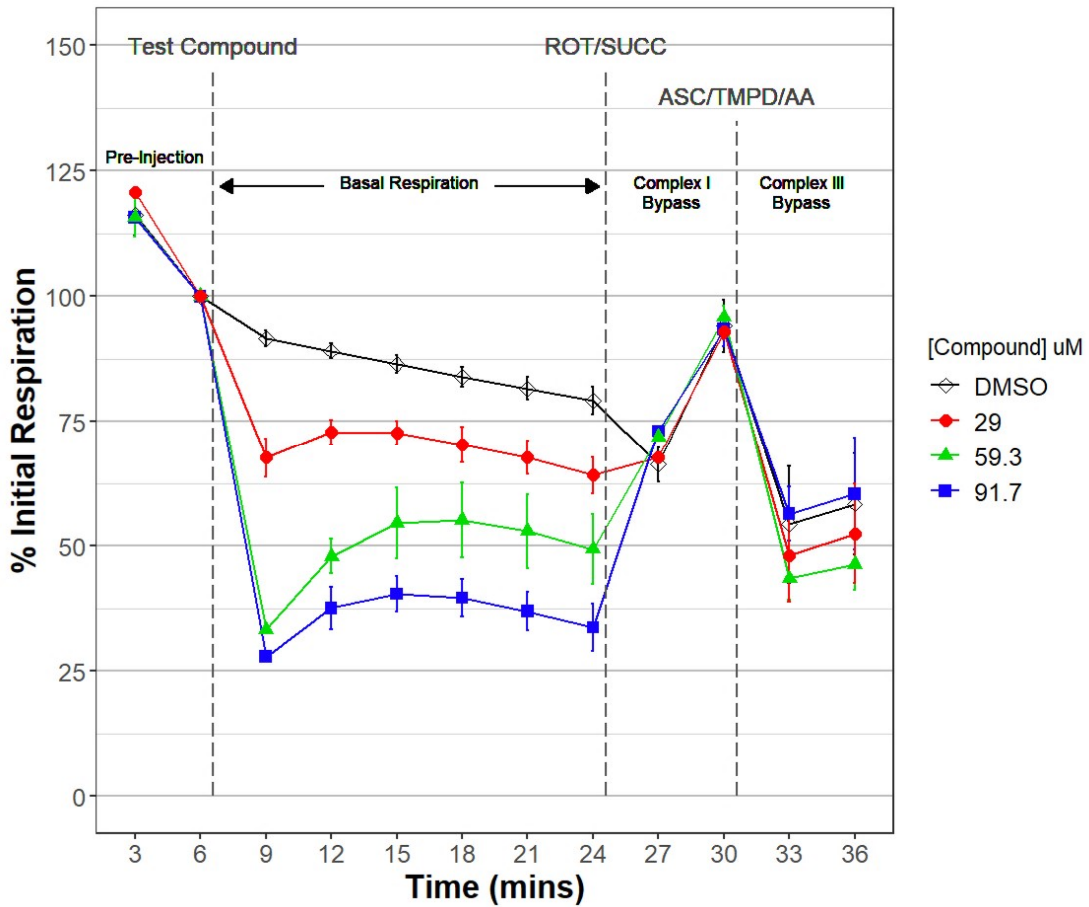

### SSR126768

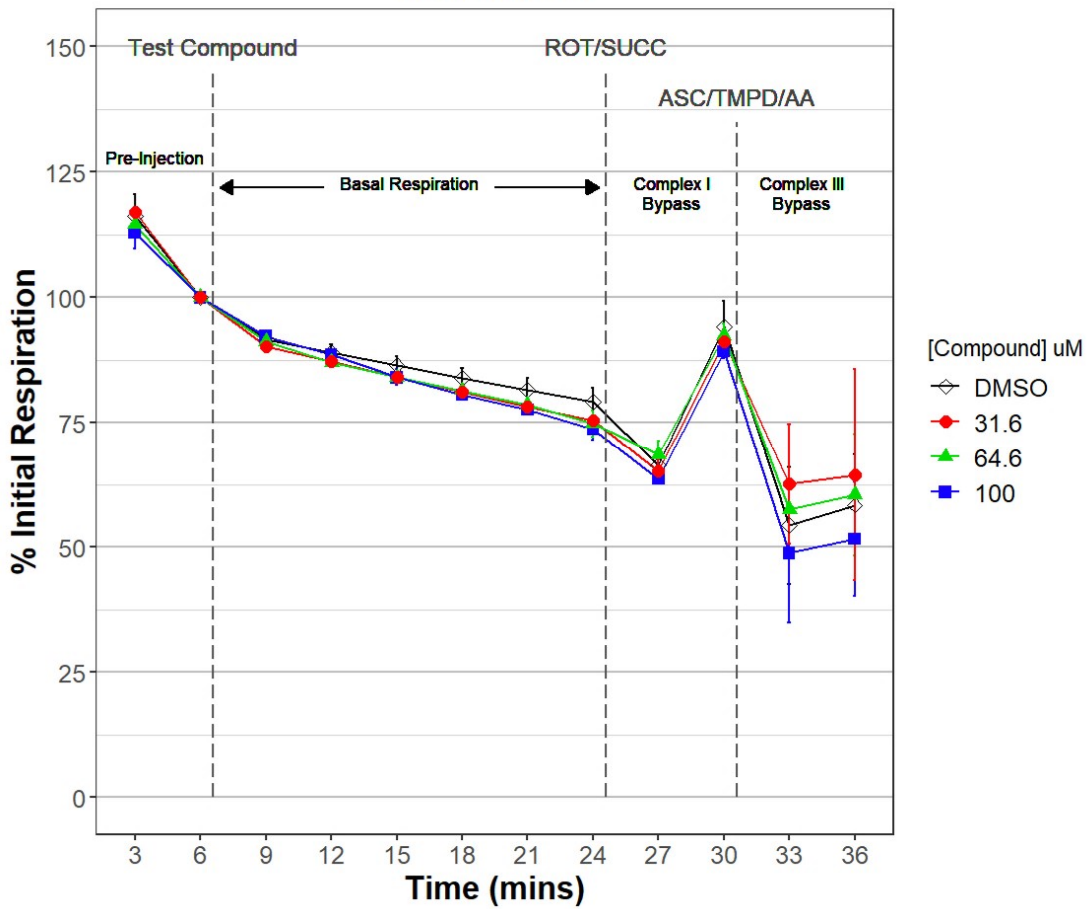

### SSR150106

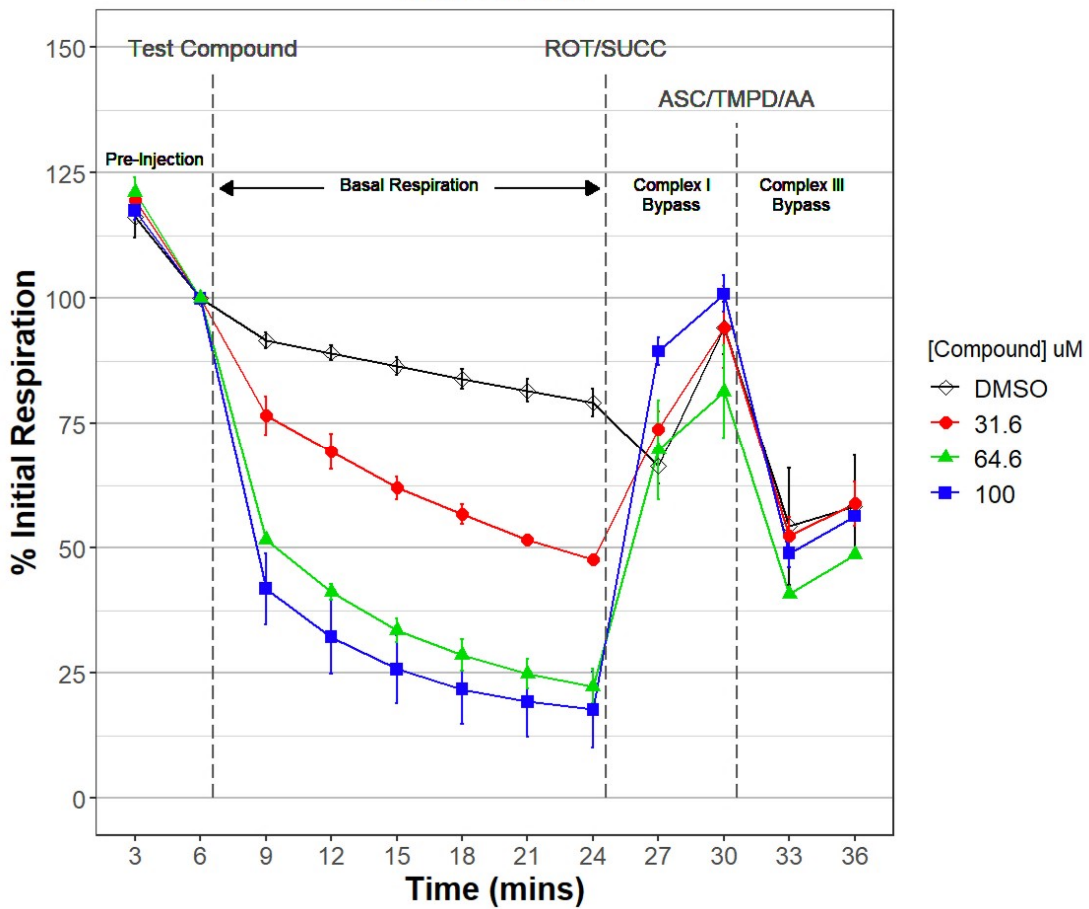

## Sodium azide

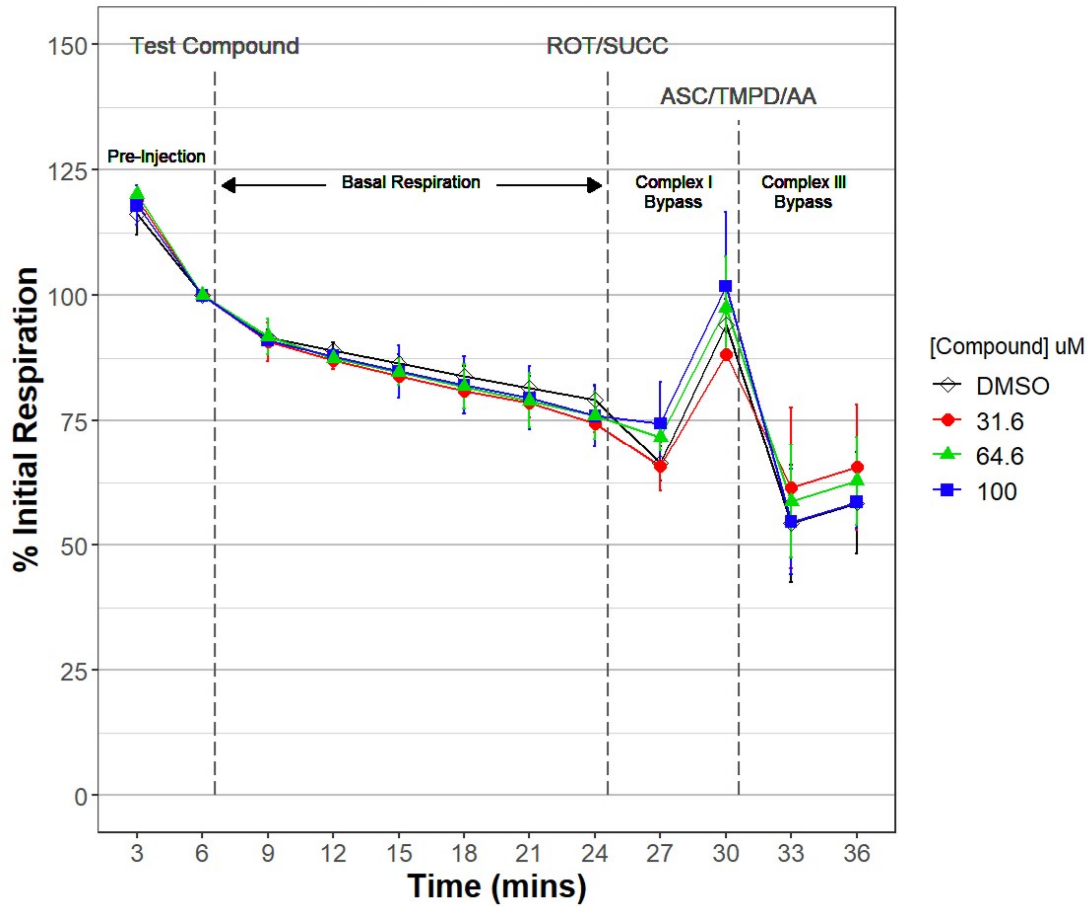

## Tamoxifen citrate

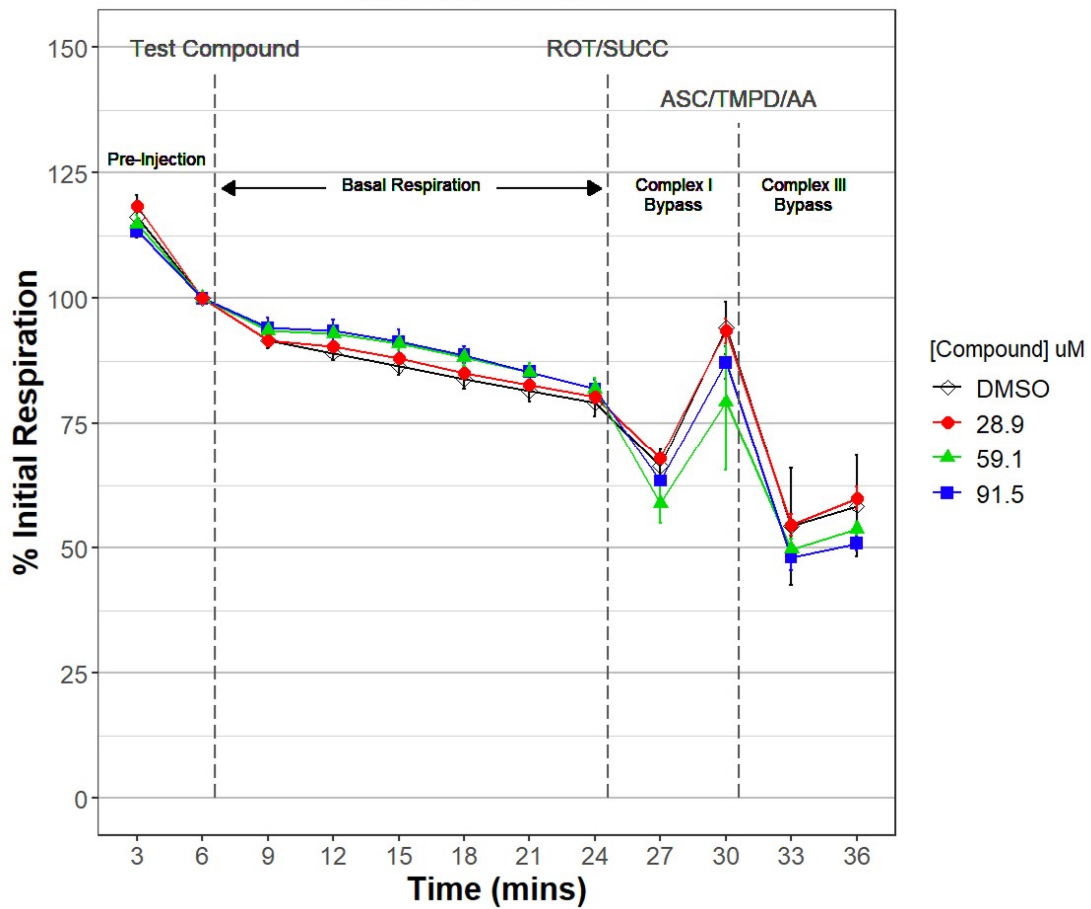



## Tebuconazole

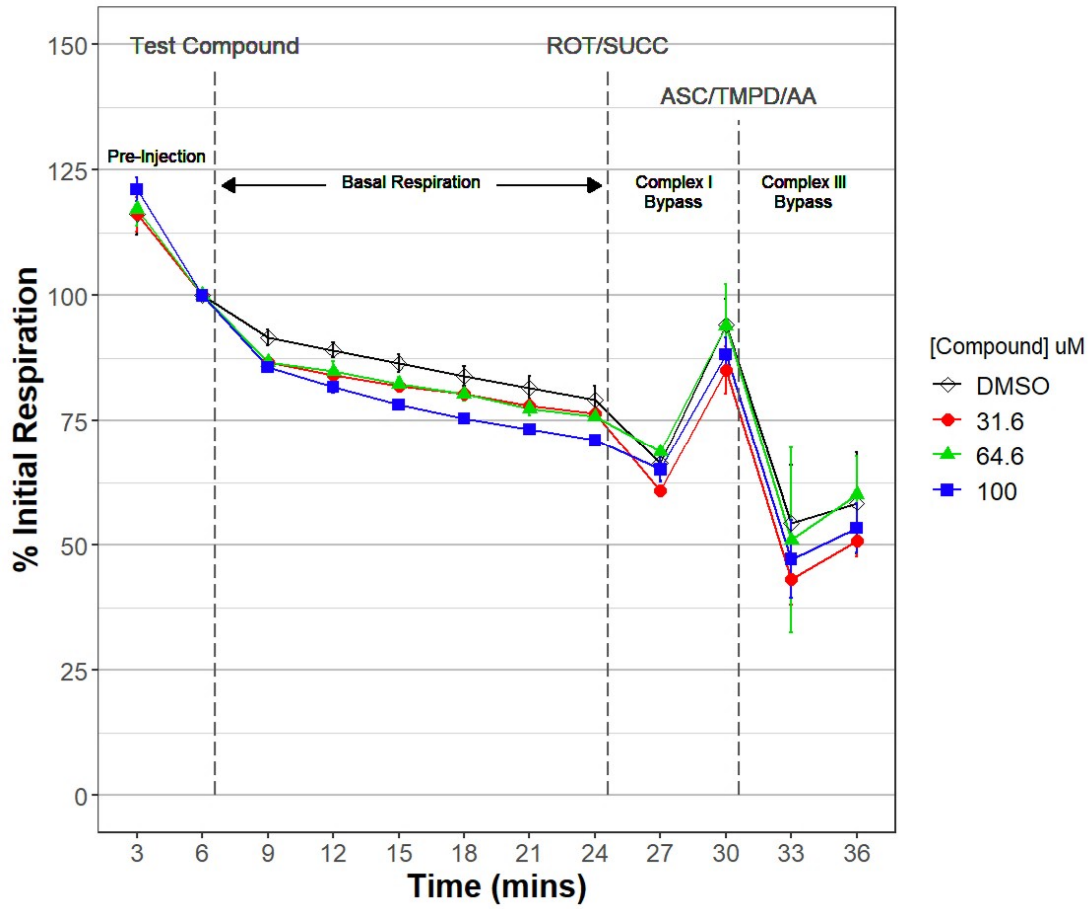

## Tebufenpyrad

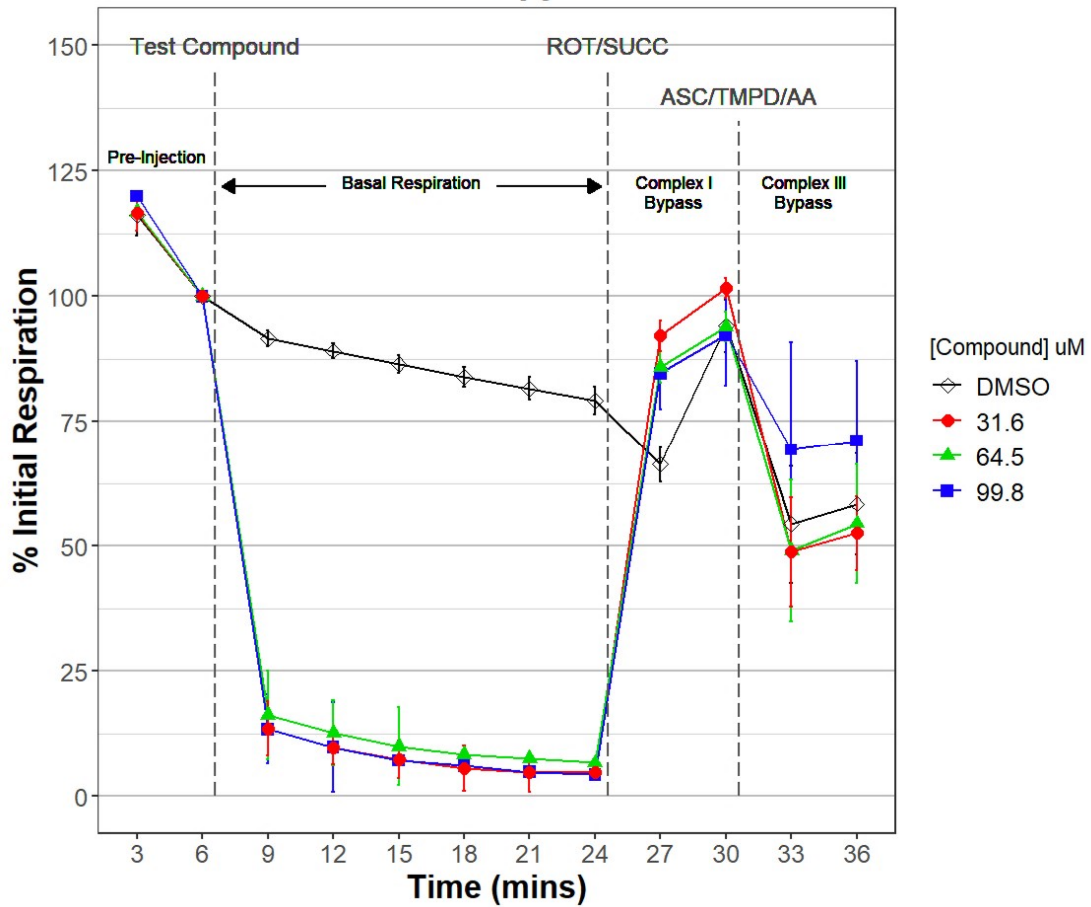

## Tebupirimfos

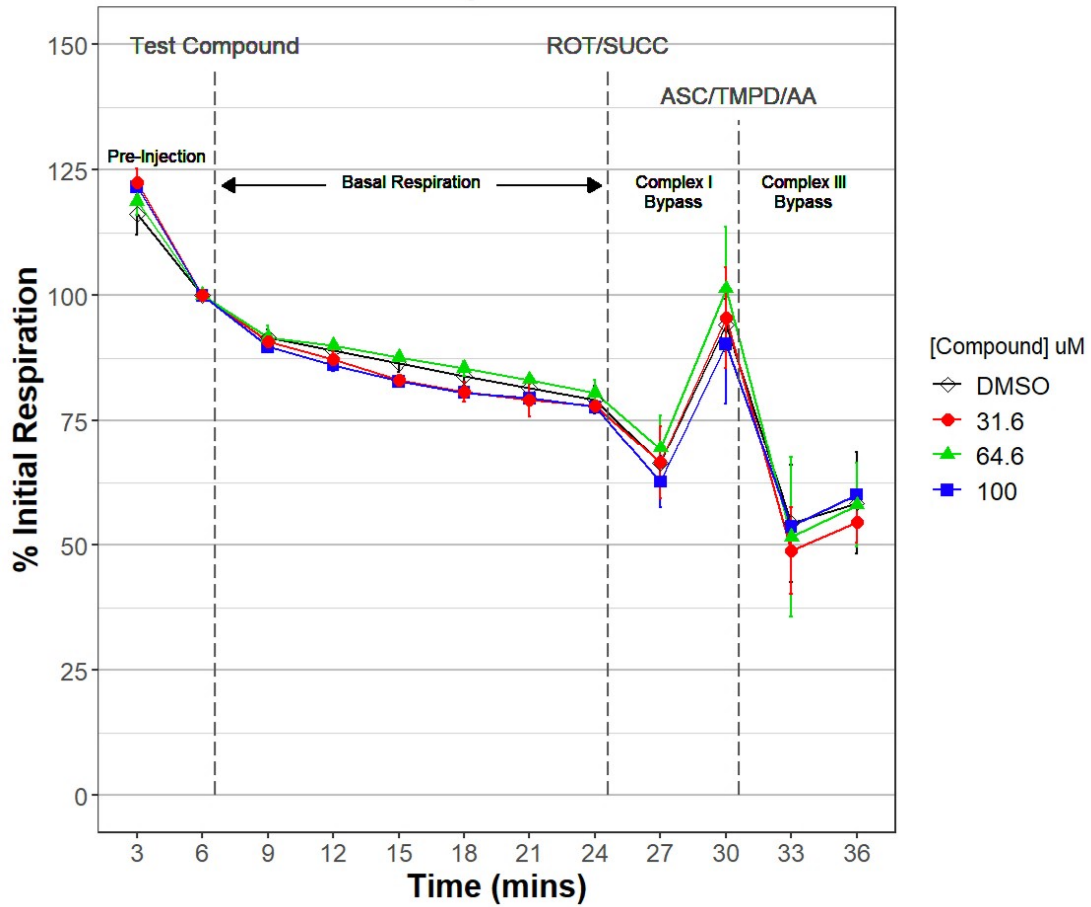

## Tetraconazole

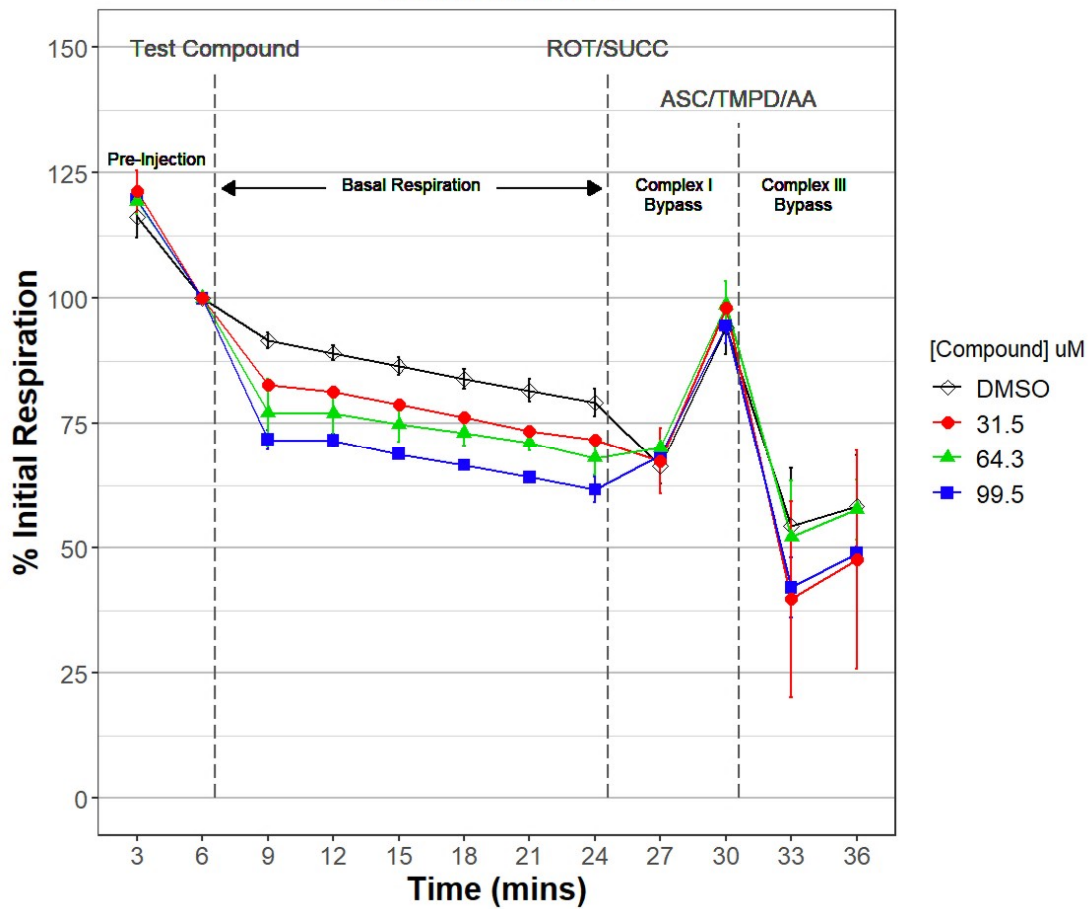

## Tetramethrin

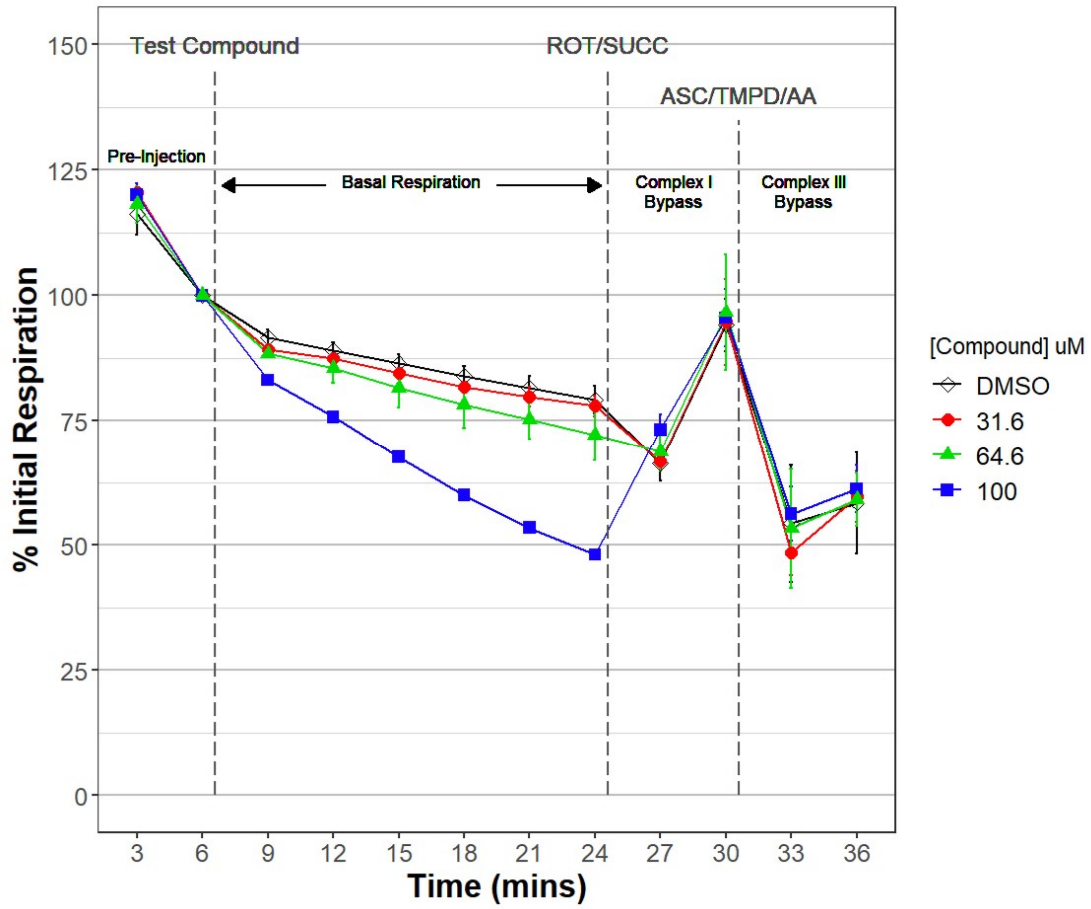

## Tiratricol

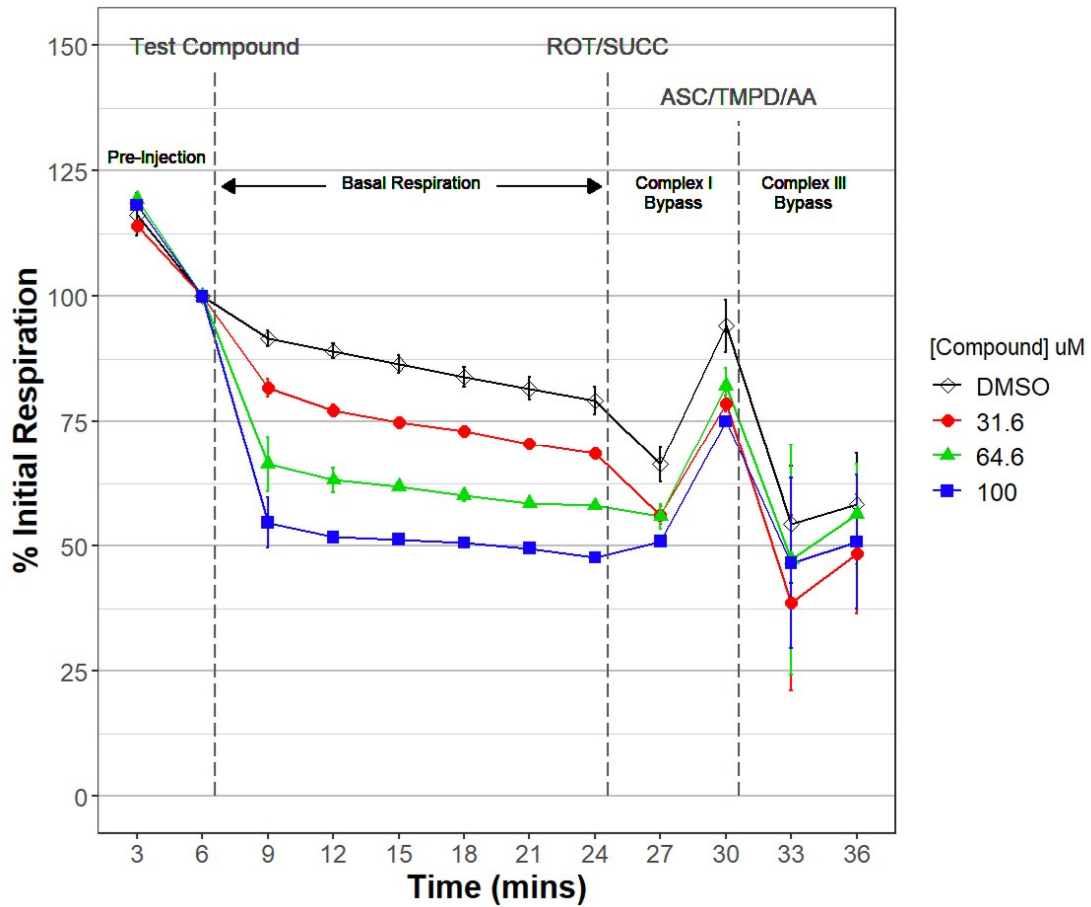

## Triadimefon

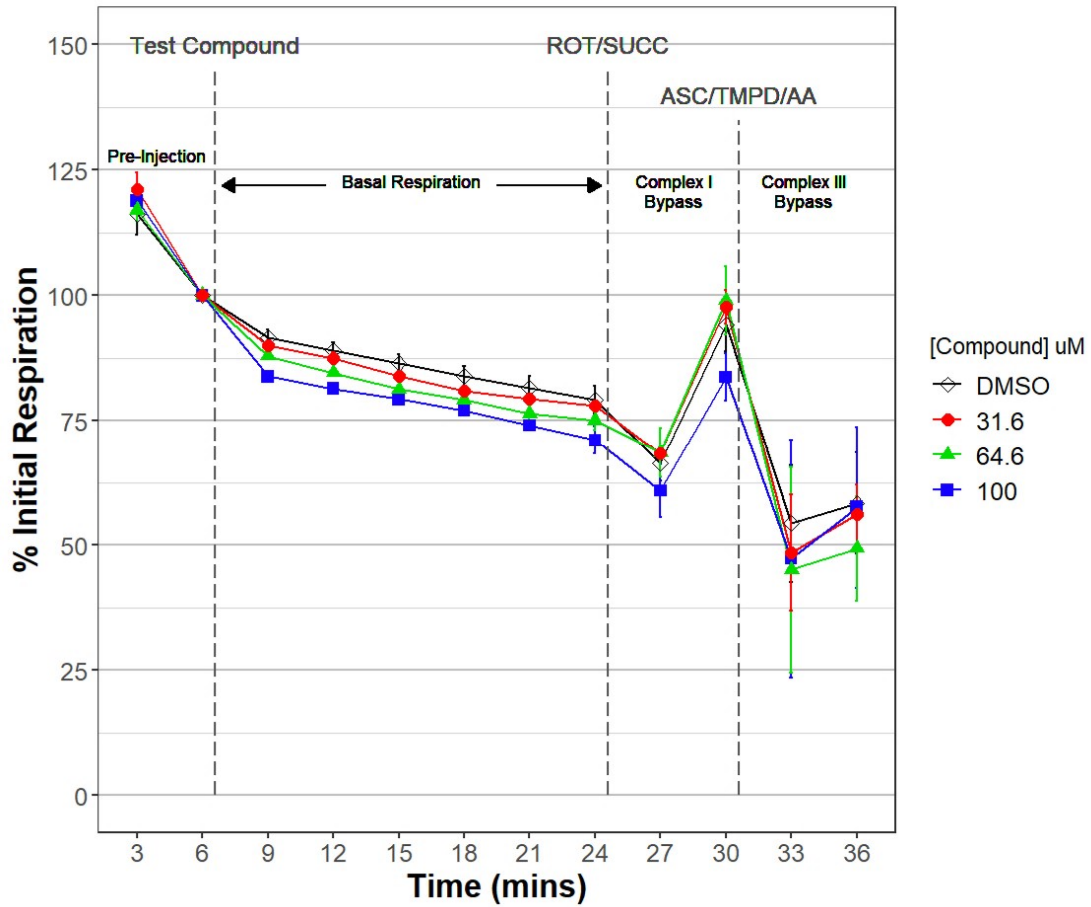

## Tributyl phosphate

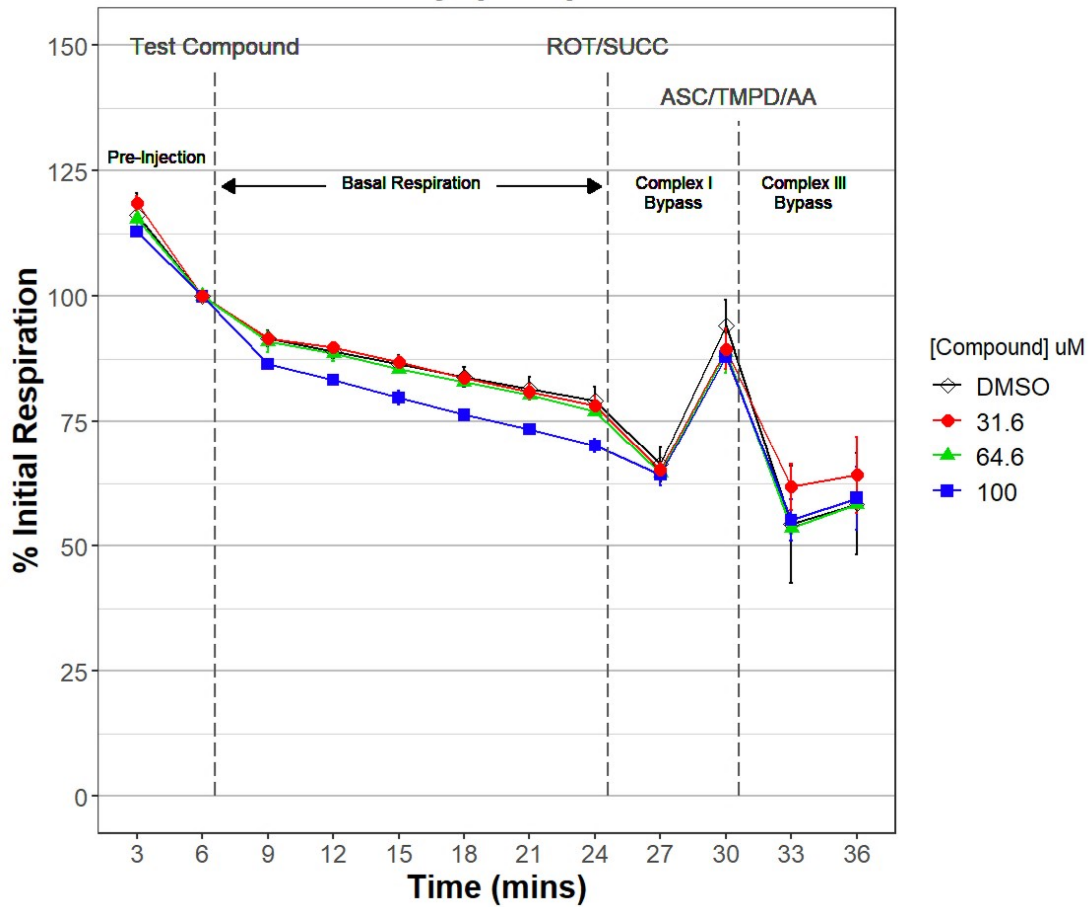

## Tributyltin chloride

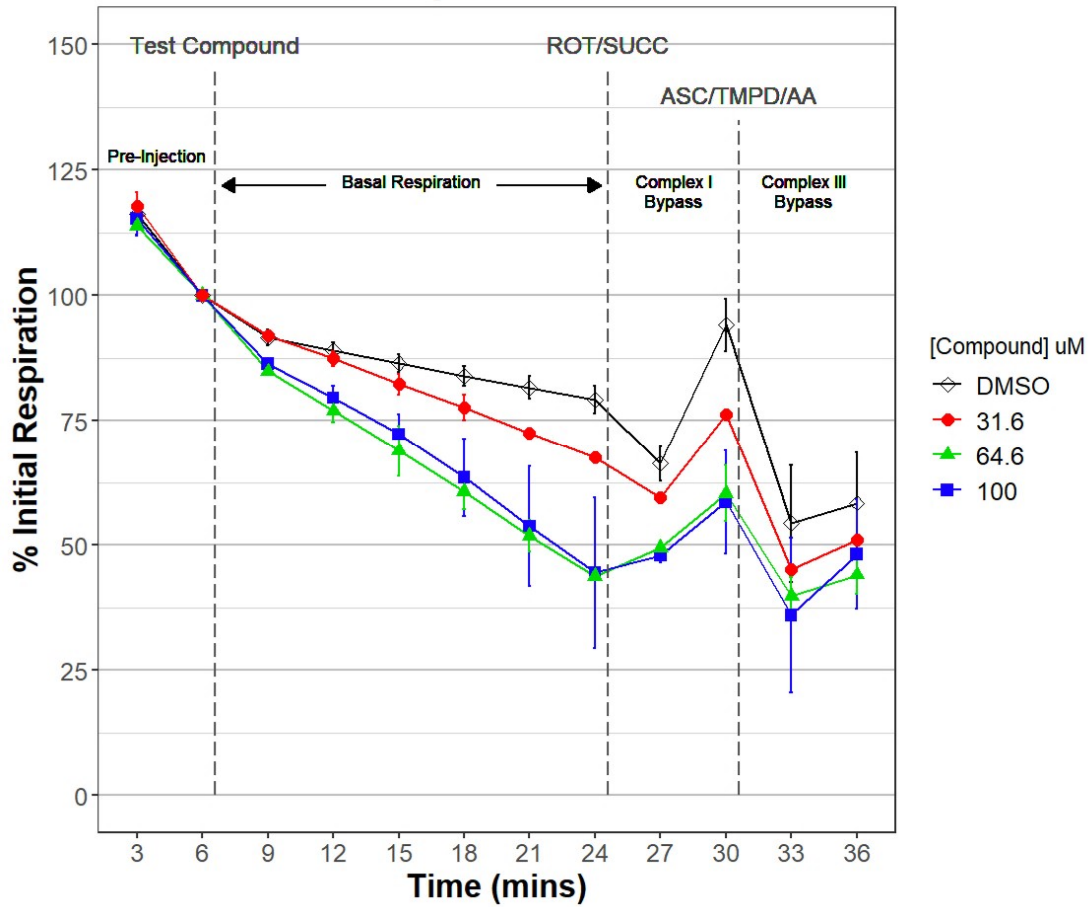

## Tributyltin methacrylate

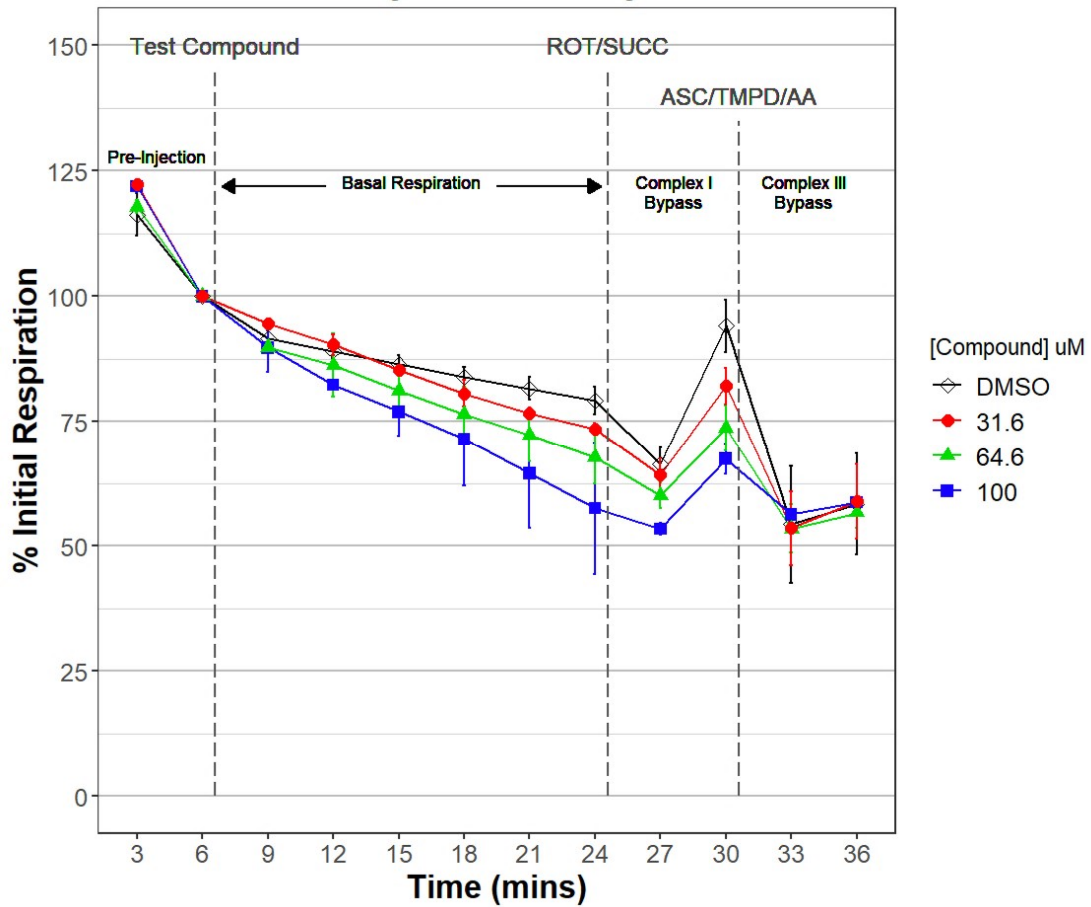



## Trifloxystrobin

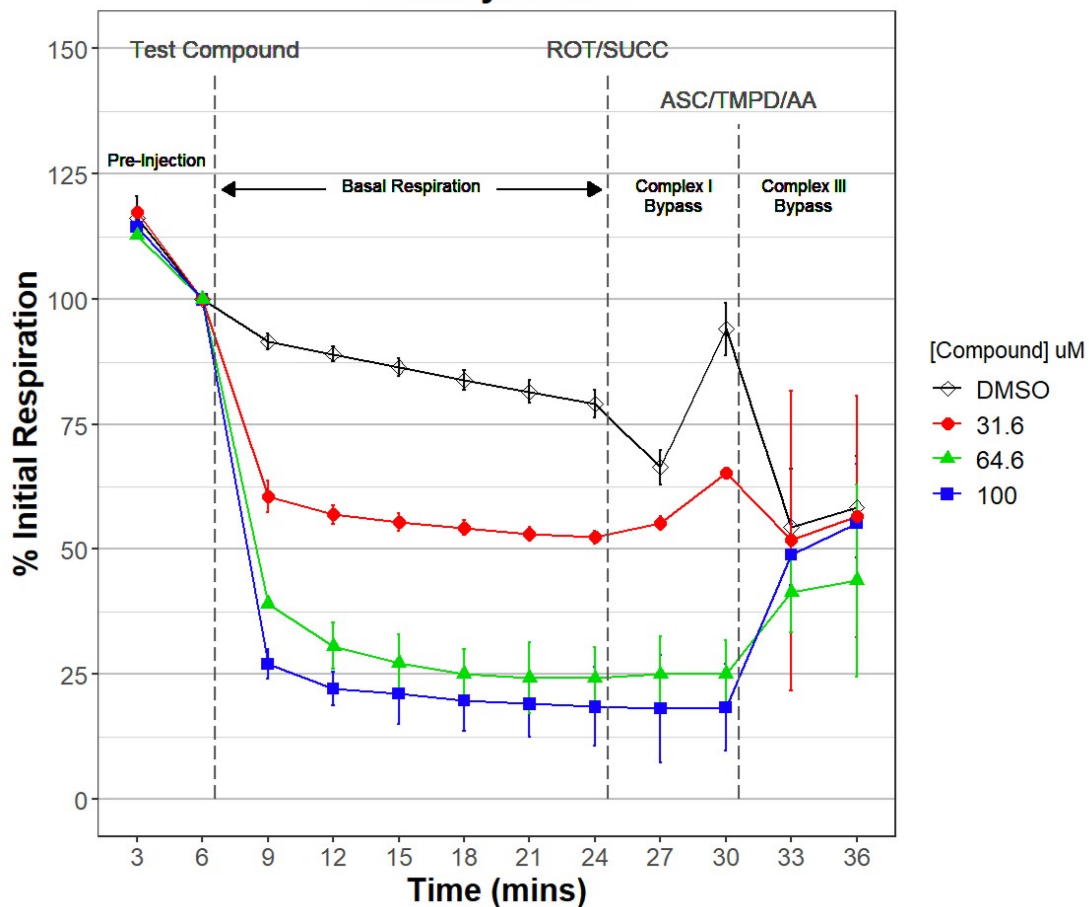

## Triflumizole

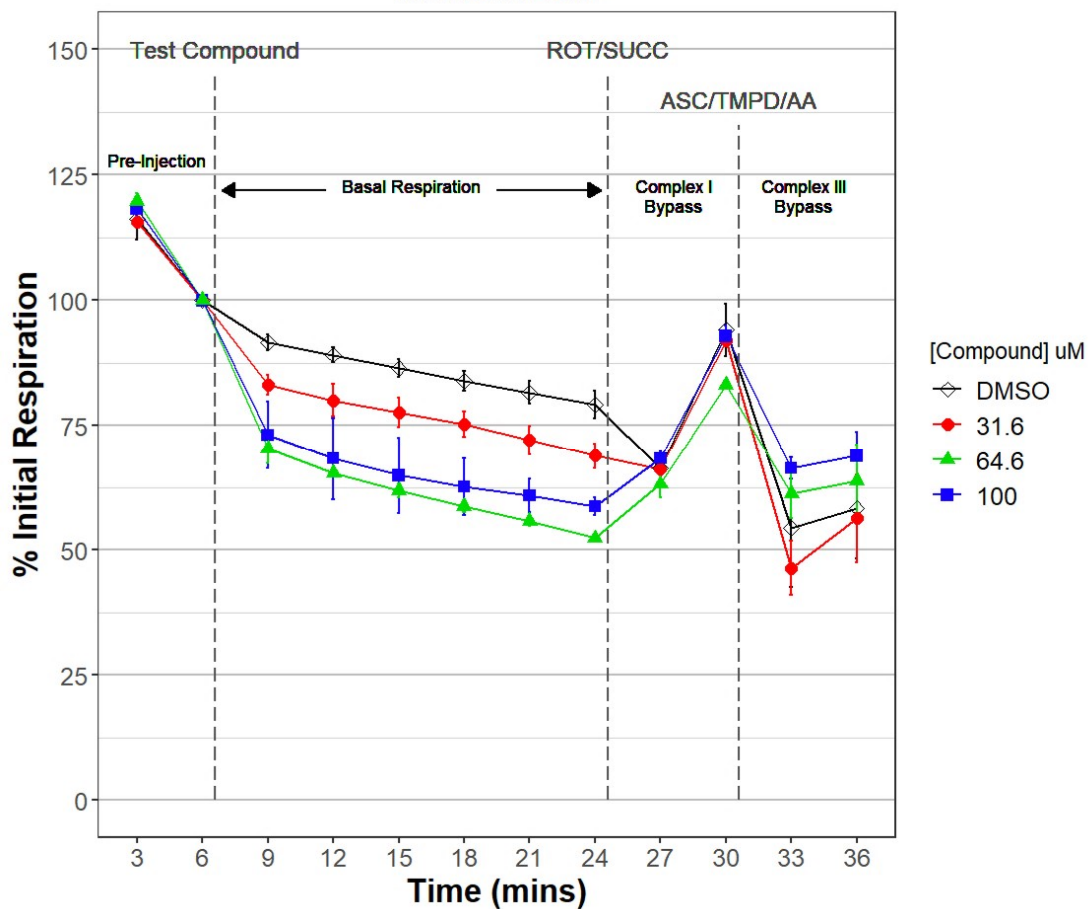

## Triphenyltin hydroxide

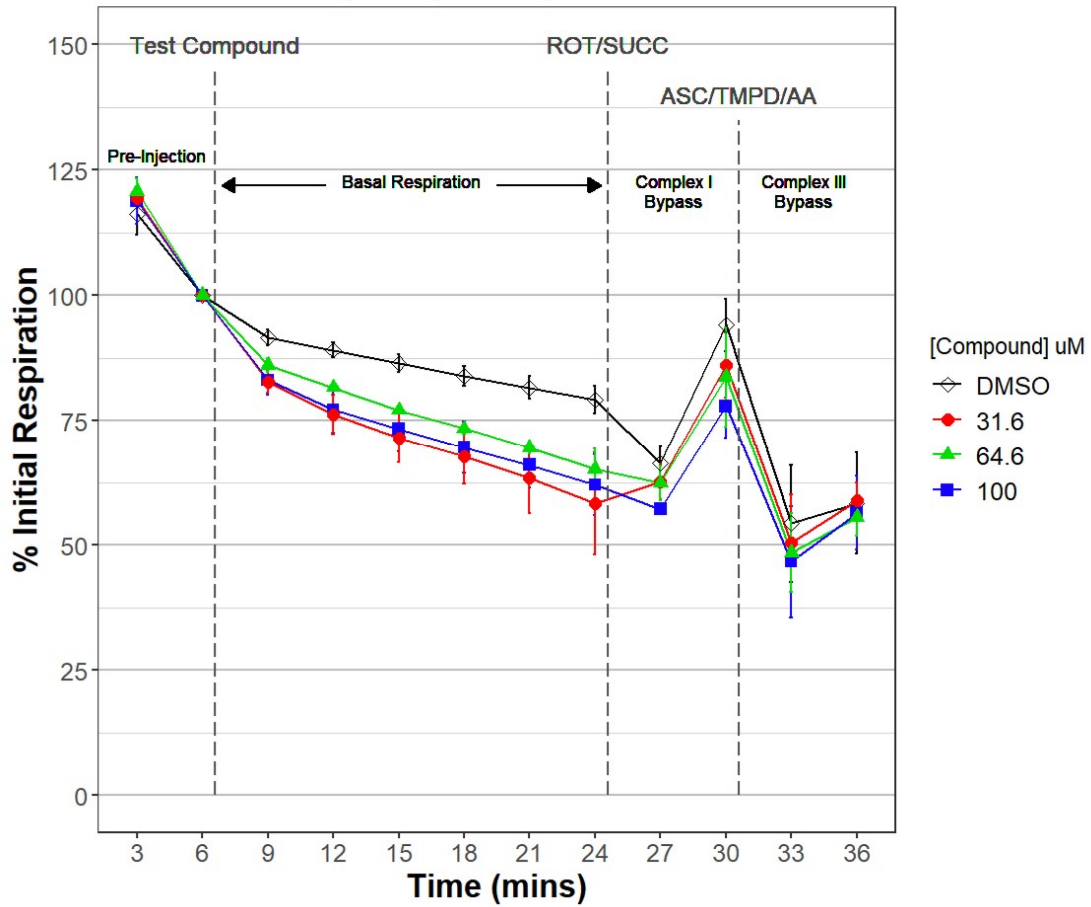

## Troglitazone

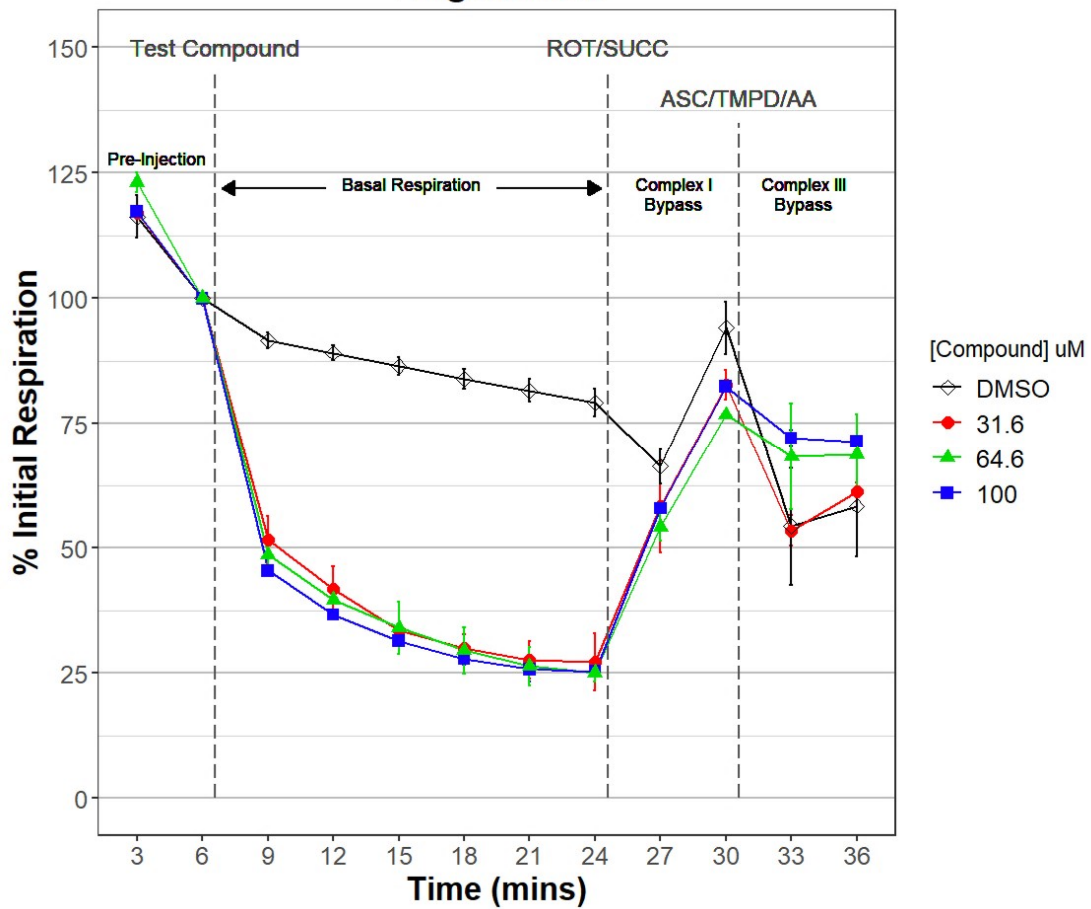

## Ziram

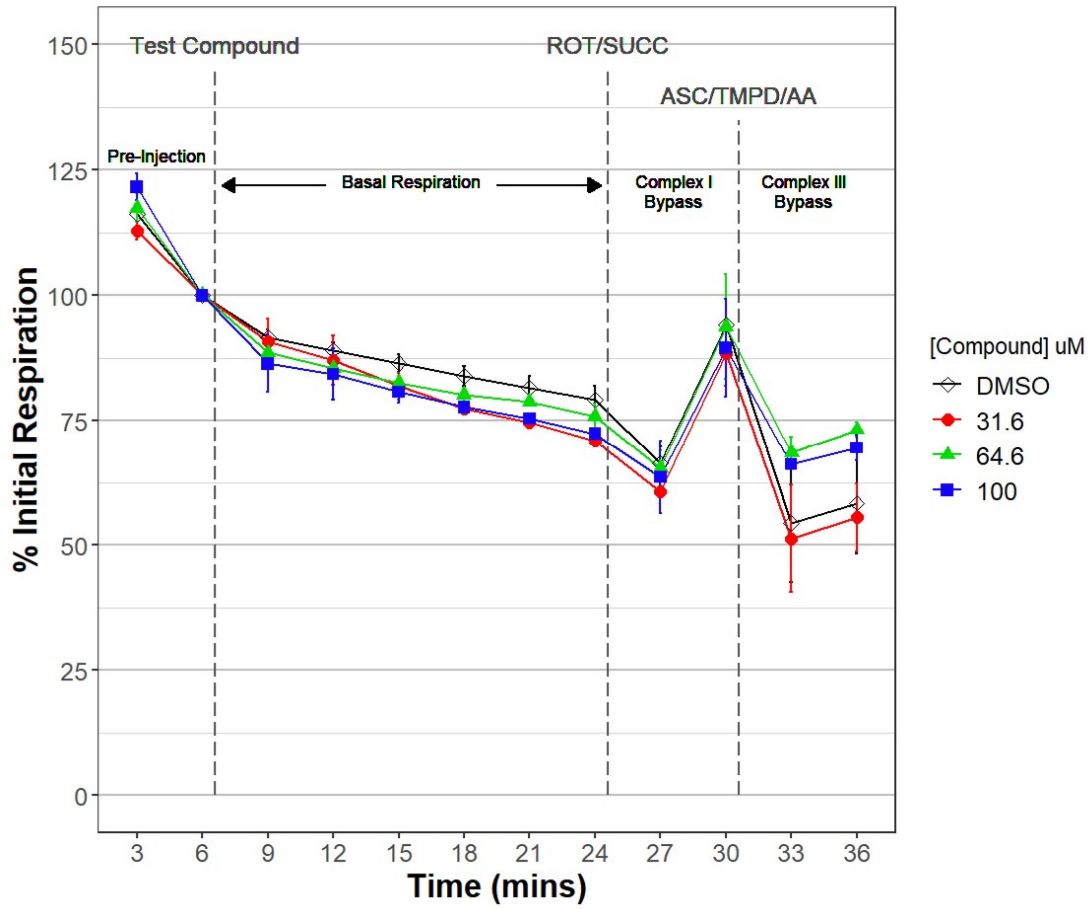

## Zoxamide

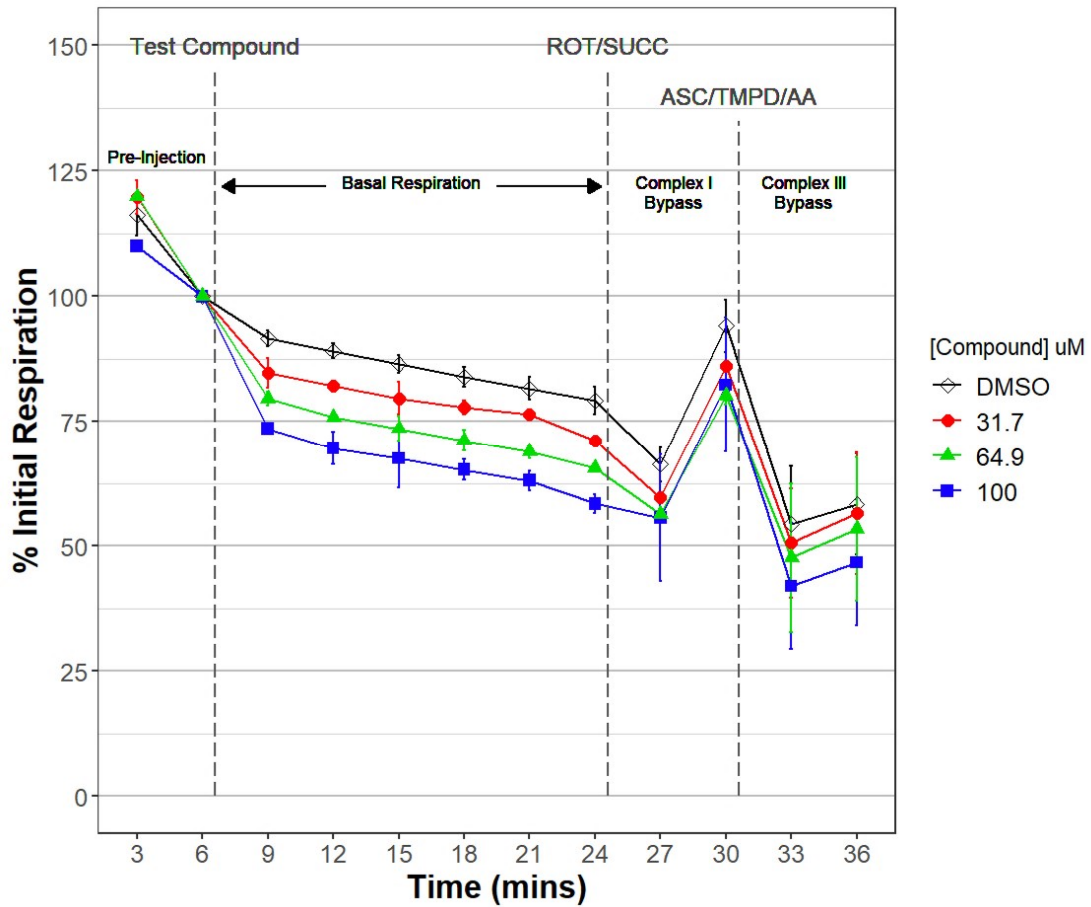

### meso-Hexestrol

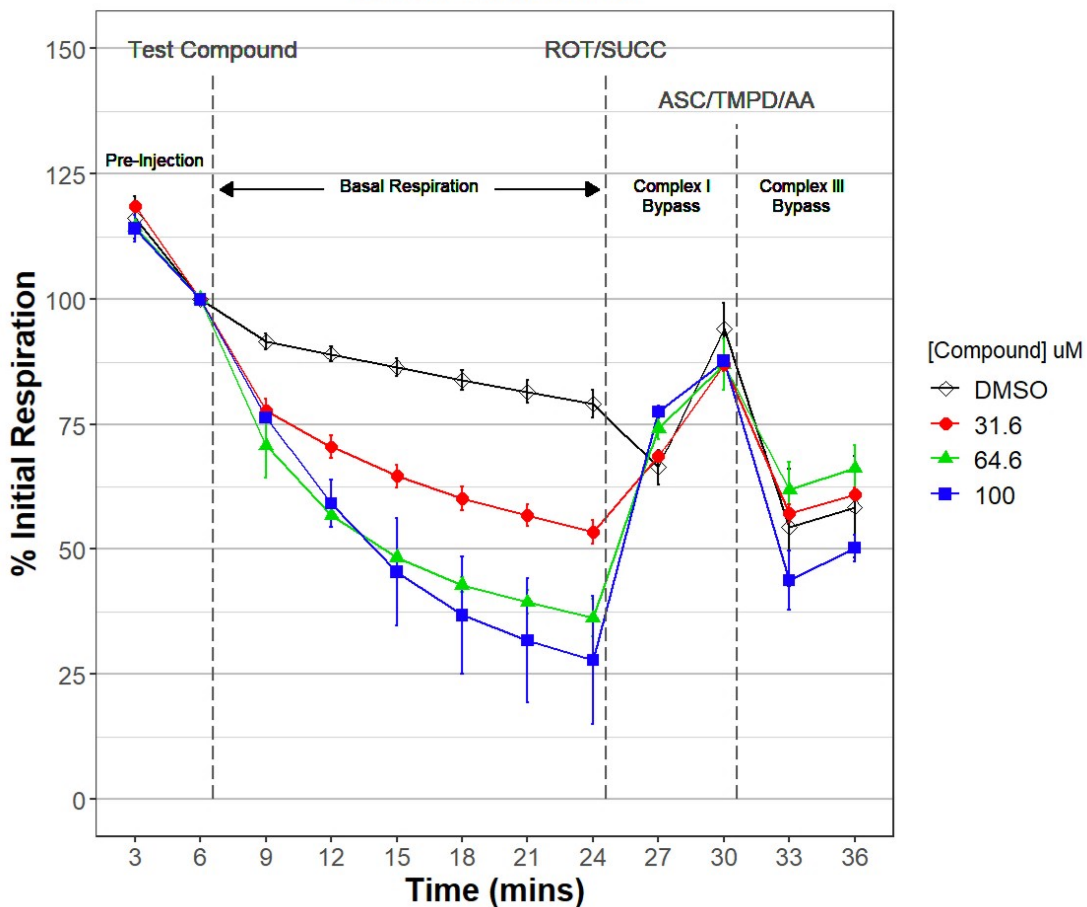

### 1-Dodecyl-2-pyrrolidinone

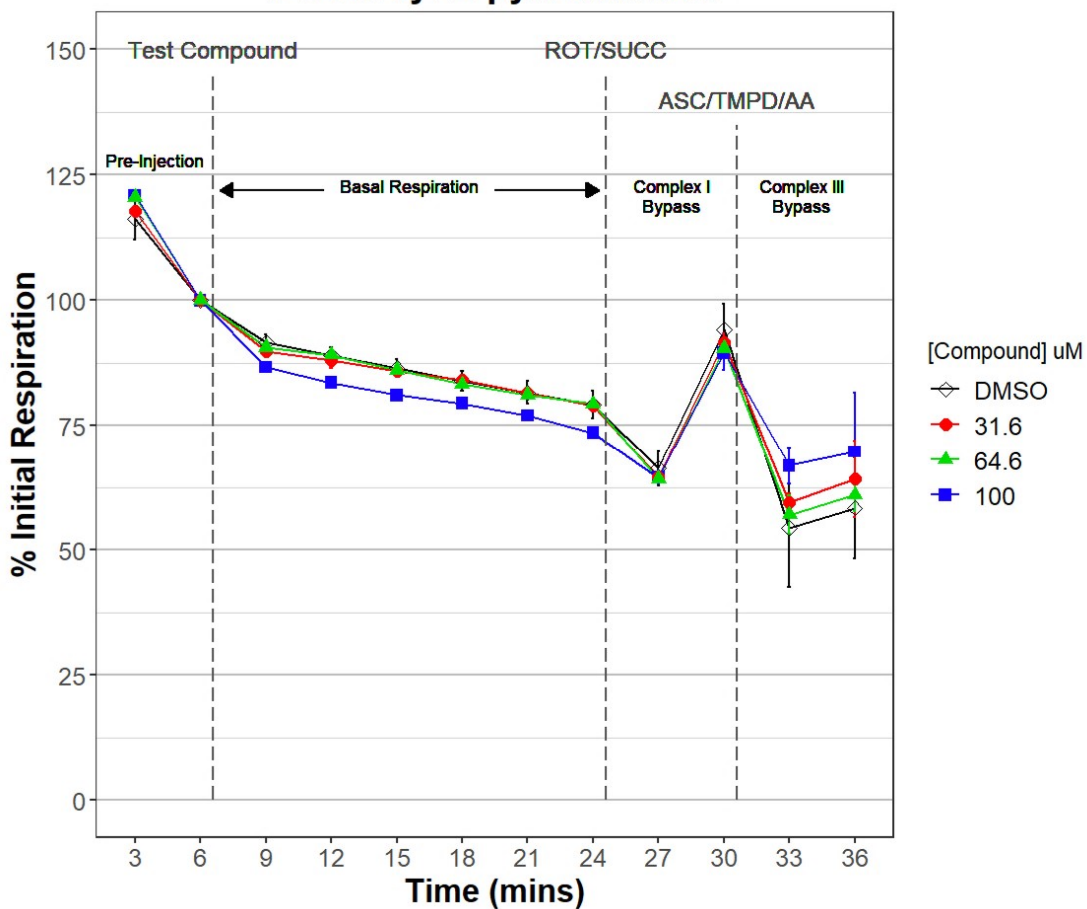

# 17alpha-Estradiol

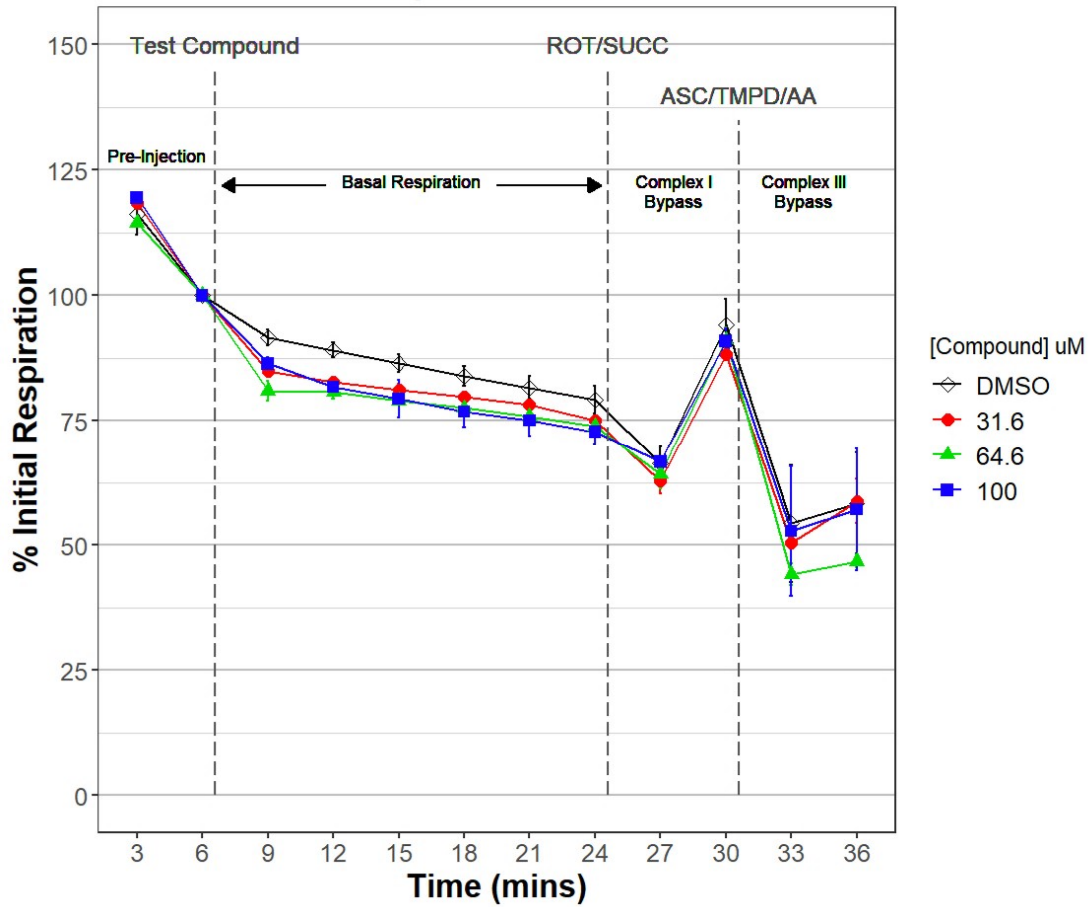

# 17alpha-Ethinylestradiol

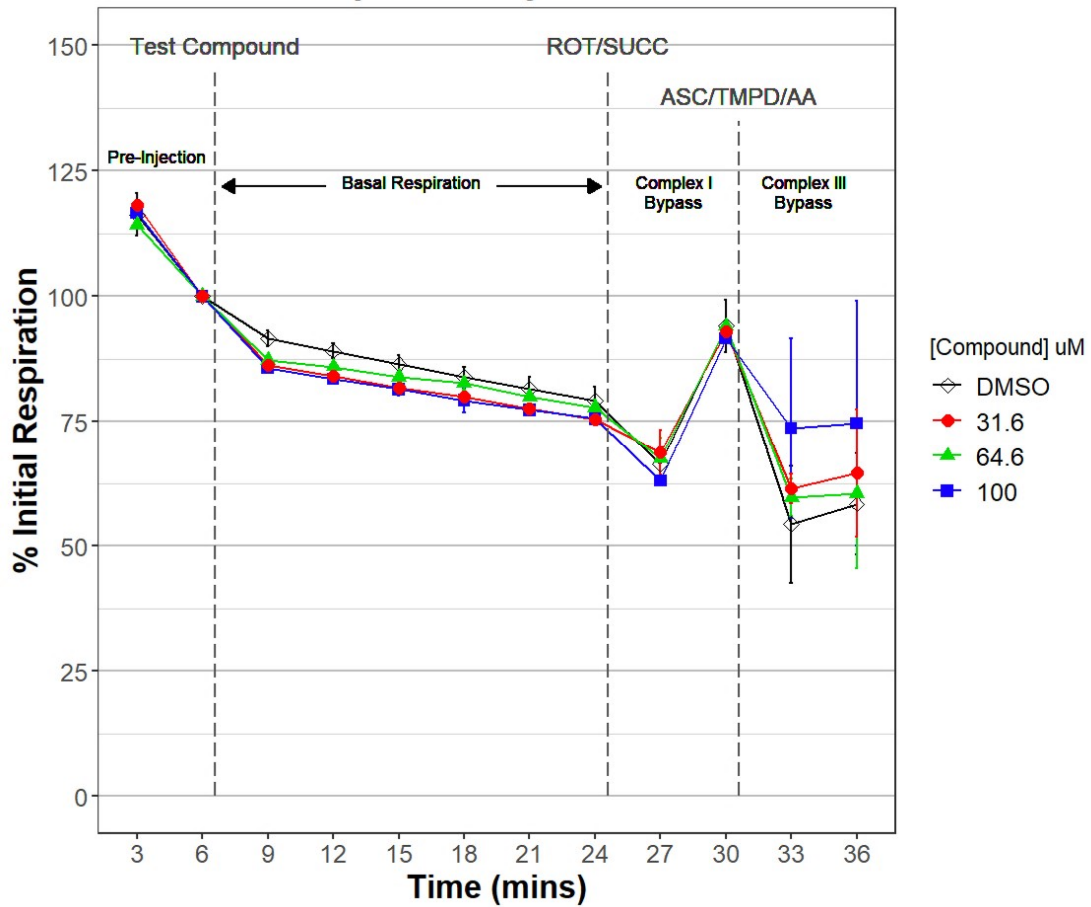



# 17beta-Estradiol

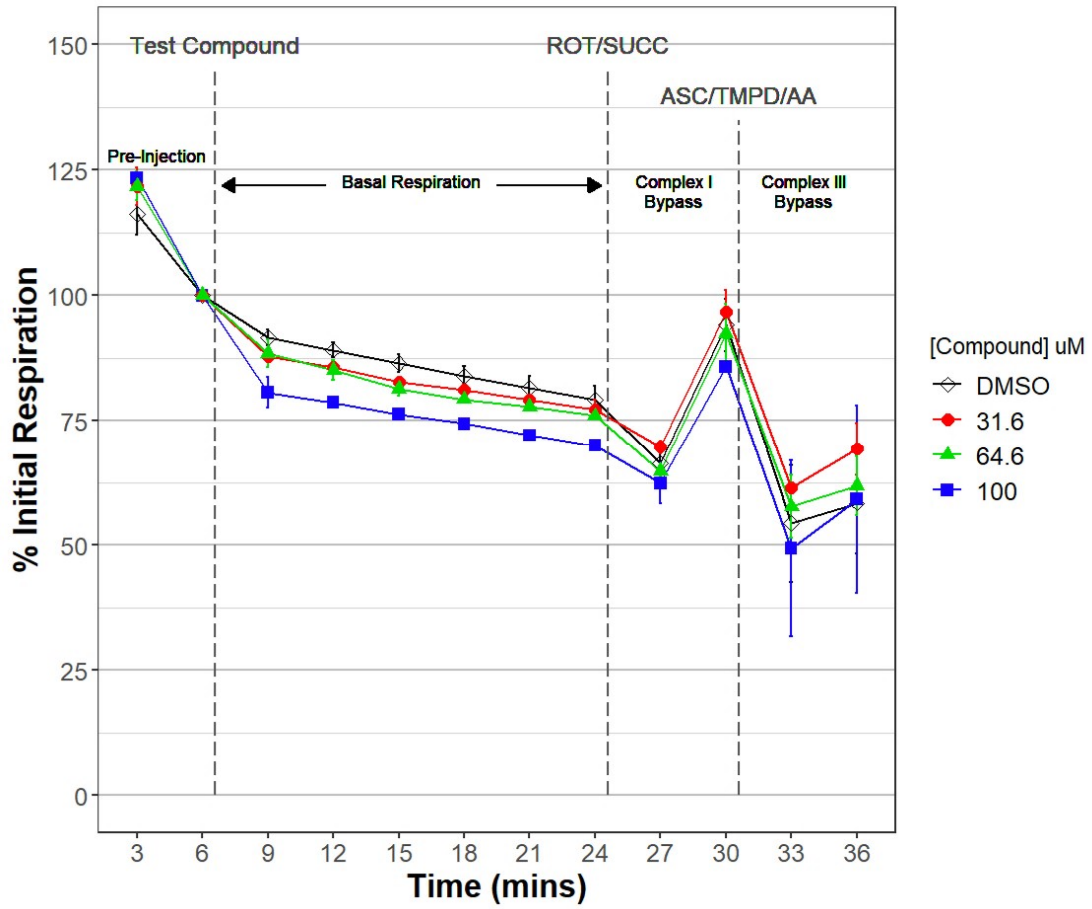

Supplement: NIHMS1679657-supplement-S4.pdf [file NIHMS1679657-supplement-S4.pdf]
