# Supplementary material
Source: PubMed Central journal article supplement (PMC10626520)
Supplement: NIHMS1679657-supplement-S1.pdf [file NIHMS1679657-supplement-S1.pdf]

## Supplemental Material

### **Respirometric Screening and Characterization of Mitochondrial Toxicants Within the ToxCast Phase I and II Chemical Libraries**

---

Daniel R. Hallinger<sup>1</sup>, Hayley B. Lindsay<sup>2</sup>, Katie Paul Friedman<sup>1</sup>, Danielle A. Suarez<sup>3</sup>, and Steven O. Simmons<sup>1</sup>

<sup>1</sup>National Center for Computational Toxicology; <sup>2</sup>Oak Ridge Associated Universities, Contractor; <sup>3</sup>Environmental and Public Health Division, National Health and Environmental Effects Research Laboratory, Office of Research and Development, U.S. Environmental Protection Agency

Authors DRH and HBL contributed equally to this work.

**Corresponding Author:**

Steven O. Simmons, Ph.D.  
109 TW Alexander Drive  
MD B205-01  
Research Triangle Park, North Carolina 27711 USA

## Supplemental File A: Methods and rationale

Apart from the cell types used, the screening protocol employed in this study differed markedly from the Wills *et al.* method. We directly injected test compounds onto cells during the screening assay rather than use a protracted pre-screen exposure. By measuring OCR before the addition of test chemicals, corrections for well-to-well variations in OCR resulting from cell seeding and plate edge effects were made possible, allowing us to assess mitochondrial function using change in normalized respiration instead of absolute OCR values. Pilot experiments conducted prior to screening revealed that longer pre-screen exposures only marginally increased effects on respiration and the number of active chemicals (data not shown). Additionally, we excluded the use of oligomycin as an injection reagent in the RSA protocol. The main purpose of oligomycin in typical respirometric mitochondrial testing is to determine coupling efficiency, i.e. the fraction of mitochondrial respiration leading to ATP synthesis. For HTT screening purposes, the absolute coupling efficiency of HepG2 cells is less important than relative coupling efficiency before and after test compound injection. Uncouplers decrease coupling efficiency by increasing proton leak and are readily identified with the tiered testing approach presented herein. Furthermore, putative ATP synthase inhibitors cannot be identified in the presence of oligomycin and omission of this injection step allowed the identification 29 such chemicals in this study.

**Table S1. Five QC metrics calculated using DMSO, fenpyroximate, and 2,4-dinitrophenol controls used to evaluate RSA performance.**

| <u>Testing Tier</u>                | <u>Plates Tested</u> | <u>Control</u>    | <u>QC Metric</u> | <u>Acceptable Range</u> | <u>Observed Range</u> | <u>Median Value</u> | <u>Plates Accepted *</u> |
|------------------------------------|----------------------|-------------------|------------------|-------------------------|-----------------------|---------------------|--------------------------|
| Single-concentration<br>(Tier 1)   | 51                   | DMSO              | rCV              | < 5%                    | 0.29-3.51%            | 1.41%               | 51                       |
|                                    |                      | Fenpyroximate     | AC <sub>50</sub> | 0.32-3.16 µM            | 0.849-1.43 µM         | 1.07 µM             | 51                       |
|                                    |                      |                   | rZ               | > 0.5                   | 0.68-0.97             | 0.88                | 51                       |
|                                    |                      | 2,4-Dinitrophenol | AC <sub>50</sub> | 2.37-23.7 µM            | 2.52-19.8 µM          | 10.1 µM             | 51                       |
|                                    |                      |                   | rZ               | > 0.5                   | -0.04-0.97            | 0.76                | 44                       |
| Multiple-concentration<br>(Tier 2) | 90                   | DMSO              | rCV              | < 5%                    | 0.11-3.42%            | 1.50%               | 90                       |
|                                    |                      | Fenpyroximate     | AC <sub>50</sub> | 0.32-3.16 µM            | 0.813-2.11 µM         | 1.15 µM             | 90                       |
|                                    |                      |                   | rZ               | > 0.5                   | 0.35-0.96             | 0.87                | 88                       |
|                                    |                      | 2,4-Dinitrophenol | AC <sub>50</sub> | 2.37-23.7 µM            | 7.58-21.2 µM          | 13.8 µM             | 90                       |
|                                    |                      |                   | rZ               | > 0.5                   | -0.12-0.99            | 0.80                | 87                       |

\* All plates accepted on ≥ four of five QC metrics

**Table S2. The 1,042 ToxCast chemicals tested in this study with activity calls for each testing tier, proposed mechanism of mitochondrial toxicity for RSA-actives and the inhibited respiratory complex(es) for putative ETC inhibitors. Maximal test concentrations are in  $\mu\text{M}$  excepting those values exceeding 200, which are in  $\mu\text{g}/\mu\text{L}$ .**

| Chemical                                       | Tier 1 Screening                       |          | Tier 2 Screening                                 |                                              |                                                |                                              | Tier 3 Screening   |                              |                       |
|------------------------------------------------|----------------------------------------|----------|--------------------------------------------------|----------------------------------------------|------------------------------------------------|----------------------------------------------|--------------------|------------------------------|-----------------------|
|                                                | Test Conc.<br>(final $\mu\text{M}^*$ ) | Activity | Increased Inhibited Respiration<br>(aeid = 2447) | Increased Basal Respiration<br>(aeid = 2443) | Decreased Maximal Respiration<br>(aeid = 2444) | Decreased Basal Respiration<br>(aeid = 2442) | Proposed Mechanism | Electron Flow Assay Activity | Inhibited ETC Complex |
| 2-(Thiocyanomethylthio)benzothiazole           | 100                                    | active   | inactive                                         | inactive                                     | active                                         | active                                       | ETCi               | active                       | I                     |
| 2,2-Bis(4-hydroxyphenyl)-1,1,1-trichloroethane | 100                                    | active   | inactive                                         | inactive                                     | active                                         | active                                       | ETCi               | active                       | I                     |
| 2,4,7,9-Tetramethyl-5-decyne-4,7-diol          | 100                                    | active   | inactive                                         | inactive                                     | active                                         | active                                       | ETCi               | active                       | I                     |
| 2,5-Di-tert-butylbenzene-1,4-diol              | 100                                    | active   | inactive                                         | inactive                                     | active                                         | active                                       | ETCi               | active                       | I                     |
| 3,3',5,5'-Tetrabromobisphenol A                | 95.4                                   | active   | inactive                                         | inactive                                     | active                                         | active                                       | ETCi               | active                       | I                     |
| 4,4'-Sulfonylbis[2-(prop-2-en-1-yl)phenol]     | 100                                    | active   | inactive                                         | inactive                                     | active                                         | active                                       | ETCi               | active                       | I                     |
| 4-Cumylphenol                                  | 100                                    | active   | inactive                                         | inactive                                     | active                                         | active                                       | ETCi               | active                       | I                     |
| 4-Hexylresorcinol                              | 100                                    | active   | inactive                                         | inactive                                     | active                                         | active                                       | ETCi               | active                       | I                     |
| 5HPP-33                                        | 100                                    | active   | inactive                                         | inactive                                     | active                                         | active                                       | ETCi               | active                       | I                     |
| Acifluorfen                                    | 100                                    | active   | inactive                                         | inactive                                     | active                                         | active                                       | ETCi               | active                       | I                     |
| Allethrin                                      | 100                                    | active   | inactive                                         | inactive                                     | active                                         | active                                       | ETCi               | active                       | I                     |
| AVE5638                                        | 100                                    | active   | inactive                                         | inactive                                     | active                                         | active                                       | ETCi               | active                       | I                     |
| Besonprodil                                    | 100                                    | active   | inactive                                         | inactive                                     | active                                         | active                                       | ETCi               | active                       | I                     |
| Bisphenol AF                                   | 100                                    | active   | inactive                                         | inactive                                     | active                                         | active                                       | ETCi               | active                       | I                     |
| Bisphenol B                                    | 100                                    | active   | inactive                                         | inactive                                     | active                                         | active                                       | ETCi               | active                       | I                     |
| Butylparaben                                   | 100                                    | active   | inactive                                         | inactive                                     | active                                         | active                                       | ETCi               | active                       | I                     |
| CJ-013610                                      | 100                                    | active   | inactive                                         | inactive                                     | active                                         | active                                       | ETCi               | active                       | I                     |
| CJ-013790                                      | 50                                     | active   | inactive                                         | inactive                                     | active                                         | active                                       | ETCi               | active                       | I                     |
| Clorophene                                     | 101                                    | active   | inactive                                         | inactive                                     | active                                         | active                                       | ETCi               | active                       | I                     |
| Corticosterone                                 | 100                                    | active   | inactive                                         | inactive                                     | active                                         | active                                       | ETCi               | active                       | I                     |
| CP-105696                                      | 50                                     | active   | inactive                                         | inactive                                     | active                                         | active                                       | ETCi               | active                       | I                     |
| CP-457677                                      | 100                                    | active   | inactive                                         | inactive                                     | active                                         | inactive                                     | ETCi               | active                       | I                     |
| CP-544439                                      | 100                                    | active   | inactive                                         | inactive                                     | active                                         | active                                       | ETCi               | active                       | I                     |
| Cyclanilide                                    | 100                                    | active   | inactive                                         | inactive                                     | active                                         | inactive                                     | ETCi               | active                       | I                     |
| Didecyldimethylammonium chloride               | 100                                    | active   | inactive                                         | inactive                                     | active                                         | active                                       | ETCi               | active                       | I                     |
| Diethylstilbestrol                             | 100                                    | active   | inactive                                         | inactive                                     | active                                         | active                                       | ETCi               | active                       | I                     |
| Difenoconazole                                 | 100                                    | active   | inactive                                         | inactive                                     | active                                         | active                                       | ETCi               | active                       | I                     |
| Dodecyltrimethylammonium chloride              | 100                                    | active   | inactive                                         | inactive                                     | active                                         | active                                       | ETCi               | active                       | I                     |
| Elzasonan                                      | 100                                    | active   | inactive                                         | inactive                                     | active                                         | inactive                                     | ETCi               | active                       | I                     |
| Ethofumesate                                   | 100                                    | active   | inactive                                         | inactive                                     | active                                         | active                                       | ETCi               | active                       | I                     |
| Fenhexamid                                     | 100                                    | active   | inactive                                         | inactive                                     | active                                         | active                                       | ETCi               | active                       | I                     |
| Fenpyroximate (Z,E)                            | 100                                    | active   | inactive                                         | inactive                                     | active                                         | active                                       | ETCi               | active                       | I                     |
| Flumioxazin                                    | 100                                    | active   | inactive                                         | inactive                                     | active                                         | active                                       | ETCi               | active                       | I                     |
| Forchlorfenuron                                | 99.9                                   | active   | inactive                                         | inactive                                     | active                                         | active                                       | ETCi               | active                       | I                     |
| Hexaconazole                                   | 100                                    | active   | inactive                                         | inactive                                     | active                                         | active                                       | ETCi               | active                       | I                     |

|                                                              |      |        |          |          |        |          |      |        |     |
|--------------------------------------------------------------|------|--------|----------|----------|--------|----------|------|--------|-----|
| Imazalil                                                     | 100  | active | inactive | inactive | active | active   | ETCi | active | I   |
| Isazofos                                                     | 100  | active | inactive | inactive | active | active   | ETCi | active | I   |
| Ketoconazole                                                 | 100  | active | inactive | inactive | active | active   | ETCi | active | I   |
| meso-Hexestrol                                               | 100  | active | inactive | inactive | active | active   | ETCi | active | I   |
| MK-968                                                       | 100  | active | inactive | inactive | active | active   | ETCi | active | I   |
| Nilutamide                                                   | 100  | active | inactive | inactive | active | active   | ETCi | active | I   |
| Octyl gallate                                                | 100  | active | inactive | inactive | active | active   | ETCi | active | I   |
| PD 0343701                                                   | 100  | active | inactive | inactive | active | active   | ETCi | active | I   |
| Phenolphthalein                                              | 100  | active | inactive | inactive | active | active   | ETCi | active | I   |
| Prallethrin                                                  | 99.8 | active | inactive | inactive | active | active   | ETCi | active | I   |
| Propetamphos                                                 | 100  | active | inactive | inactive | active | active   | ETCi | active | I   |
| Pyridaben                                                    | 100  | active | inactive | inactive | active | active   | ETCi | active | I   |
| Rotenone                                                     | 100  | active | inactive | inactive | active | active   | ETCi | active | I   |
| SAR 150640                                                   | 100  | active | inactive | inactive | active | active   | ETCi | active | I   |
| S-Bioallethrin                                               | 100  | active | inactive | inactive | active | active   | ETCi | active | I   |
| SR58611                                                      | 91.7 | active | inactive | inactive | active | active   | ETCi | active | I   |
| SSR150106                                                    | 100  | active | inactive | inactive | active | active   | ETCi | active | I   |
| Tebufenpyrad                                                 | 99.8 | active | inactive | inactive | active | active   | ETCi | active | I   |
| Tetraconazole                                                | 99.5 | active | inactive | inactive | active | active   | ETCi | active | I   |
| Tetramethrin                                                 | 100  | active | inactive | inactive | active | active   | ETCi | active | I   |
| Triflumizole                                                 | 100  | active | inactive | inactive | active | active   | ETCi | active | I   |
| Triphenyltin hydroxide                                       | 100  | active | inactive | inactive | active | inactive | ETCi | active | I   |
| Troglitazone                                                 | 100  | active | inactive | inactive | active | active   | ETCi | active | I   |
| Zoxamide                                                     | 100  | active | inactive | inactive | active | inactive | ETCi | active | I   |
| Carboxin                                                     | 100  | active | inactive | inactive | active | inactive | ETCi | active | II  |
| Chlorpyrifos oxon                                            | 99.6 | active | inactive | inactive | active | active   | ETCi | active | II  |
| Chlorpyrifos-methyl                                          | 100  | active | inactive | inactive | active | inactive | ETCi | active | II  |
| MK-274                                                       | 100  | active | inactive | inactive | active | active   | ETCi | active | II  |
| PharmaGSID_48514                                             | 100  | active | inactive | inactive | active | active   | ETCi | active | II  |
| 3-Iodo-2-propynyl-N-butylcarbamate                           | 100  | active | inactive | inactive | active | active   | ETCi | active | III |
| Azoxystrobin                                                 | 100  | active | inactive | inactive | active | active   | ETCi | active | III |
| CP-085958                                                    | 50   | active | inactive | inactive | active | inactive | ETCi | active | III |
| Docusate sodium                                              | 100  | active | inactive | inactive | active | inactive | ETCi | active | III |
| Fenamidon                                                    | 100  | active | inactive | inactive | active | active   | ETCi | active | III |
| Fluoxastrobin                                                | 100  | active | inactive | inactive | active | active   | ETCi | active | III |
| FR150011                                                     | 100  | active | inactive | inactive | active | active   | ETCi | active | III |
| Mercuric chloride                                            | 100  | active | inactive | inactive | active | active   | ETCi | active | III |
| Milbemectin (mixture of 70% Milbemcin A4, 30% Milbemycin A3) | 97.7 | active | inactive | inactive | active | active   | ETCi | active | III |
| Octhilinone                                                  | 104  | active | inactive | inactive | active | inactive | ETCi | active | III |
| Phenylmercuric acetate                                       | 100  | active | inactive | inactive | active | active   | ETCi | active | III |
| Picoxystrobin                                                | 100  | active | inactive | inactive | active | active   | ETCi | active | III |

|                                       |       |        |          |          |        |          |      |          |             |
|---------------------------------------|-------|--------|----------|----------|--------|----------|------|----------|-------------|
| Pyraclostrobin                        | 100   | active | inactive | inactive | active | active   | ETCi | active   | III         |
| Tributyltin chloride                  | 100   | active | inactive | inactive | active | active   | ETCi | active   | III         |
| Trifloxystrobin                       | 100   | active | inactive | inactive | active | active   | ETCi | active   | III         |
| Dodecylbenzenesulfonic acid           | 100   | active | inactive | inactive | active | inactive | ETCi | active   | IV          |
| Famoxadone                            | 100   | active | inactive | inactive | active | active   | ETCi | active   | Mixed I/III |
| Methylene bis(thiocyanate)            | 100   | active | inactive | inactive | active | active   | ETCi | active   | Mixed I/III |
| Tiratricol                            | 100   | active | inactive | inactive | active | active   | ETCi | active   | Mixed I/III |
| Tributyltin methacrylate              | 100   | active | inactive | inactive | active | active   | ETCi | active   | Mixed I/III |
| 17alpha-Estradiol                     | 100   | active | inactive | inactive | active | active   | ETCi | inactive | nd          |
| 17alpha-Ethinylestradiol              | 100   | active | inactive | inactive | active | active   | ETCi | inactive | nd          |
| 17beta-Estradiol                      | 100   | active | inactive | inactive | active | active   | ETCi | inactive | nd          |
| 1-Dodecyl-2-pyrrolidinone             | 100   | active | inactive | inactive | active | active   | ETCi | inactive | nd          |
| 2,2',4,4'-Tetrahydroxybenzophenone    | 100   | active | inactive | inactive | active | active   | ETCi | inactive | nd          |
| 2,4-Bis(1-methyl-1-phenylethyl)phenol | 100   | active | inactive | inactive | active | inactive | ETCi | inactive | nd          |
| 2,4-Di-tert-pentylphenol              | 100   | active | inactive | inactive | active | active   | ETCi | inactive | nd          |
| 2-Amino-5-azotoluene                  | 100   | active | inactive | inactive | active | active   | ETCi | inactive | nd          |
| 2-tert-Butyl-4-ethylphenol            | 100   | active | inactive | inactive | active | active   | ETCi | inactive | nd          |
| 2-tert-Butyl-4-methoxyphenol          | 100   | active | inactive | inactive | active | active   | ETCi | inactive | nd          |
| 2-Tert-Butyl-5-methylphenol           | 100   | active | inactive | inactive | active | active   | ETCi | inactive | nd          |
| 4-(1,1,3,3-Tetramethylbutyl)phenol    | 100   | active | inactive | inactive | active | active   | ETCi | inactive | nd          |
| 4-(2-Methylbutan-2-yl)phenol          | 100   | active | inactive | inactive | active | active   | ETCi | inactive | nd          |
| 4-Androstene-3,17-dione               | 100   | active | inactive | inactive | active | active   | ETCi | inactive | nd          |
| 4-Cyclohexylcyclohexanol              | 100   | active | inactive | inactive | active | active   | ETCi | inactive | nd          |
| 4-Cyclohexylcyclohexanone             | 100   | active | inactive | inactive | active | active   | ETCi | inactive | nd          |
| 4-Heptylphenol                        | 100   | active | inactive | inactive | active | active   | ETCi | inactive | nd          |
| 4-Nonylphenol, branched               | 100   | active | inactive | inactive | active | active   | ETCi | inactive | nd          |
| 4-Octylphenol                         | 100   | active | inactive | inactive | active | active   | ETCi | inactive | nd          |
| 7,12-Dimethylbenz(a)anthracene        | 100   | active | inactive | inactive | active | active   | ETCi | inactive | nd          |
| Abamectin                             | 100   | active | inactive | inactive | active | active   | ETCi | inactive | nd          |
| Alachlor                              | 100   | active | inactive | inactive | active | active   | ETCi | inactive | nd          |
| Bisphenol A                           | 100.5 | active | inactive | inactive | active | active   | ETCi | inactive | nd          |
| Captan                                | 98.7  | active | inactive | inactive | active | active   | ETCi | inactive | nd          |
| Clomiphene citrate (1:1)              | 100   | active | inactive | inactive | active | inactive | ETCi | inactive | nd          |
| CP-401387                             | 50    | active | inactive | inactive | active | active   | ETCi | inactive | nd          |
| CP-863187                             | 100   | active | inactive | inactive | active | active   | ETCi | inactive | nd          |
| Cyproconazole                         | 100   | active | inactive | inactive | active | active   | ETCi | inactive | nd          |
| Cyproterone acetate                   | 100   | active | inactive | inactive | active | active   | ETCi | inactive | nd          |
| Diallyl phthalate                     | 100   | active | inactive | inactive | active | active   | ETCi | inactive | nd          |
| Difenzoquat metilsulfate              | 100   | active | inactive | inactive | active | active   | ETCi | inactive | nd          |
| Diisobutyl phthalate                  | 100   | active | inactive | inactive | active | active   | ETCi | inactive | nd          |
| Diniconazole                          | 100   | active | inactive | inactive | active | active   | ETCi | inactive | nd          |

|                                  |      |        |          |          |          |          |           |          |    |
|----------------------------------|------|--------|----------|----------|----------|----------|-----------|----------|----|
| Emamectin benzoate               | 100  | active | inactive | inactive | active   | active   | ETCi      | inactive | nd |
| Ethoprop                         | 100  | active | inactive | inactive | active   | active   | ETCi      | inactive | nd |
| Fenamiphos                       | 100  | active | inactive | inactive | active   | inactive | ETCi      | inactive | nd |
| Fenofibrate                      | 100  | active | inactive | inactive | active   | active   | ETCi      | inactive | nd |
| Fenoxycarb                       | 100  | active | inactive | inactive | active   | active   | ETCi      | inactive | nd |
| Flusilazole                      | 100  | active | inactive | inactive | active   | active   | ETCi      | inactive | nd |
| HMR1426                          | 100  | active | inactive | inactive | active   | inactive | ETCi      | inactive | nd |
| Hydroxyflutamide                 | 100  | active | inactive | inactive | active   | active   | ETCi      | inactive | nd |
| Kepone                           | 100  | active | inactive | inactive | active   | active   | ETCi      | inactive | nd |
| Linuron                          | 100  | active | inactive | inactive | active   | active   | ETCi      | inactive | nd |
| Metolachlor                      | 100  | active | inactive | inactive | active   | active   | ETCi      | inactive | nd |
| Octylbicycloheptenedicarboximide | 100  | active | inactive | inactive | active   | active   | ETCi      | inactive | nd |
| Oryzalin                         | 100  | active | inactive | inactive | active   | active   | ETCi      | inactive | nd |
| PD-0333941                       | 100  | active | inactive | inactive | active   | active   | ETCi      | inactive | nd |
| Pendimethalin                    | 100  | active | inactive | inactive | active   | active   | ETCi      | inactive | nd |
| PharmaGSID_48172                 | 79.4 | active | inactive | inactive | active   | active   | ETCi      | inactive | nd |
| PharmaGSID_48519                 | 100  | active | inactive | inactive | active   | active   | ETCi      | inactive | nd |
| Phorate                          | 100  | active | inactive | inactive | active   | inactive | ETCi      | inactive | nd |
| Prochloraz                       | 100  | active | inactive | inactive | active   | active   | ETCi      | inactive | nd |
| Progesterone                     | 100  | active | inactive | inactive | active   | active   | ETCi      | inactive | nd |
| Propanil                         | 100  | active | inactive | inactive | active   | active   | ETCi      | inactive | nd |
| Propargite                       | 100  | active | inactive | inactive | active   | active   | ETCi      | inactive | nd |
| Propiconazole                    | 100  | active | inactive | inactive | active   | active   | ETCi      | inactive | nd |
| Sodium azide                     | 100  | active | inactive | inactive | active   | inactive | ETCi      | inactive | nd |
| SR125047                         | 90.7 | active | inactive | inactive | active   | inactive | ETCi      | inactive | nd |
| SSR126768                        | 100  | active | inactive | inactive | active   | active   | ETCi      | inactive | nd |
| Tamoxifen citrate                | 91.5 | active | inactive | inactive | active   | inactive | ETCi      | inactive | nd |
| Tebuconazole                     | 100  | active | inactive | inactive | active   | active   | ETCi      | inactive | nd |
| Tebupirimfos                     | 100  | active | inactive | inactive | active   | active   | ETCi      | inactive | nd |
| Triadimefon                      | 100  | active | inactive | inactive | active   | active   | ETCi      | inactive | nd |
| Tributyl phosphate               | 100  | active | inactive | inactive | active   | active   | ETCi      | inactive | nd |
| Ziram                            | 100  | active | inactive | inactive | active   | active   | ETCi      | inactive | nd |
| 2,4,5-Trichlorophenol            | 100  | active | inactive | active   | active   | active   | Uncoupler |          |    |
| 2,4,6-Trichlorophenol            | 100  | active | inactive | active   | inactive | inactive | Uncoupler |          |    |
| 2,4-Dinitrophenol                | 100  | active | inactive | active   | inactive | inactive | Uncoupler |          |    |
| 2-Methyl-4,6-dinitrophenol       | 100  | active | inactive | active   | active   | inactive | Uncoupler |          |    |
| 4-Nitrophenol                    | 100  | active | inactive | active   | inactive | inactive | Uncoupler |          |    |
| Bromoxynil                       | 80   | active | inactive | active   | active   | inactive | Uncoupler |          |    |
| CP-100829                        | 50   | active | inactive | active   | active   | active   | Uncoupler |          |    |
| Cyazofamid                       | 100  | active | inactive | active   | active   | inactive | Uncoupler |          |    |
| Dinoseb                          | 100  | active | inactive | active   | active   | active   | Uncoupler |          |    |

|                                      |      |        |          |          |          |          |              |  |  |
|--------------------------------------|------|--------|----------|----------|----------|----------|--------------|--|--|
| Fluazinam                            | 100  | active | inactive | active   | inactive | inactive | Uncoupler    |  |  |
| Niclosamide                          | 50   | active | inactive | active   | active   | active   | Uncoupler    |  |  |
| Pentachlorophenol                    | 51.1 | active | inactive | active   | active   | active   | Uncoupler    |  |  |
| Perfluorooctanesulfonamide           | 100  | active | inactive | active   | inactive | inactive | Uncoupler    |  |  |
| Sodium 4-nitrophenolate              | 100  | active | inactive | active   | inactive | inactive | Uncoupler    |  |  |
| Triclosan                            | 100  | active | inactive | active   | active   | inactive | Uncoupler    |  |  |
| 10-Undecenoic acid                   | 100  | active | inactive | inactive | inactive | active   | ATP Synthase |  |  |
| 1-Undecanol                          | 100  | active | inactive | inactive | inactive | active   | ATP Synthase |  |  |
| 2,4-Dichlorophenoxybutyric acid      | 102  | active | inactive | inactive | inactive | active   | ATP Synthase |  |  |
| 3,5,3'-Triiodothyronine              | 25   | active | inactive | inactive | inactive | active   | ATP Synthase |  |  |
| 4-(Butan-2-yl)phenol                 | 100  | active | inactive | inactive | inactive | active   | ATP Synthase |  |  |
| 4,4',4''-Ethane-1,1,1-triyltriphenol | 100  | active | inactive | inactive | inactive | active   | ATP Synthase |  |  |
| 4-tert-Butylphenol                   | 100  | active | inactive | inactive | inactive | active   | ATP Synthase |  |  |
| 5-Heptyldihydro-2(3H)-furanone       | 100  | active | inactive | inactive | inactive | active   | ATP Synthase |  |  |
| Allura Red C.I.16035                 | 100  | active | inactive | inactive | inactive | active   | ATP Synthase |  |  |
| Butam                                | 100  | active | inactive | inactive | inactive | active   | ATP Synthase |  |  |
| Chlorothalonil                       | 100  | active | inactive | inactive | inactive | active   | ATP Synthase |  |  |
| Cycloate                             | 100  | active | inactive | inactive | inactive | active   | ATP Synthase |  |  |
| Decanoic acid                        | 104  | active | inactive | inactive | inactive | active   | ATP Synthase |  |  |
| Dimethenamid                         | 100  | active | inactive | inactive | inactive | active   | ATP Synthase |  |  |
| Fabesetron hydrochloride             | 88.9 | active | inactive | inactive | inactive | active   | ATP Synthase |  |  |
| Fluazifop-P-butyl                    | 100  | active | inactive | inactive | inactive | active   | ATP Synthase |  |  |
| Fludioxonil                          | 100  | active | inactive | inactive | inactive | active   | ATP Synthase |  |  |
| Geraniol                             | 100  | active | inactive | inactive | inactive | active   | ATP Synthase |  |  |
| Indomethacin                         | 100  | active | inactive | inactive | inactive | active   | ATP Synthase |  |  |
| MEHP                                 | 102  | active | inactive | inactive | inactive | active   | ATP Synthase |  |  |
| Metalaxyl                            | 100  | active | inactive | inactive | inactive | active   | ATP Synthase |  |  |
| MK-578                               | 100  | active | inactive | inactive | inactive | active   | ATP Synthase |  |  |
| Naled                                | 100  | active | inactive | inactive | inactive | active   | ATP Synthase |  |  |
| PharmaGSID_47337                     | 100  | active | inactive | inactive | inactive | active   | ATP Synthase |  |  |
| PharmaGSID_48510                     | 100  | active | inactive | inactive | inactive | active   | ATP Synthase |  |  |
| Propylparaben                        | 100  | active | inactive | inactive | inactive | active   | ATP Synthase |  |  |
| Testosterone propionate              | 100  | active | inactive | inactive | inactive | active   | ATP Synthase |  |  |
| UK-156819                            | 100  | active | inactive | inactive | inactive | active   | ATP Synthase |  |  |
| UK-373911                            | 100  | active | inactive | inactive | inactive | active   | ATP Synthase |  |  |
| Gentian Violet                       | 100  | active | inactive | inactive | active   | active   | Interference |  |  |
| 1,2-Dinitrobenzene                   | 100  | active | active   | active   | inactive | inactive | Redox        |  |  |
| 1,3-Benzenediamine                   | 100  | active | active   | inactive | inactive | inactive | Redox        |  |  |
| 1,5-Naphthalenediamine               | 100  | active | active   | inactive | inactive | inactive | Redox        |  |  |
| 5-Amino-2-methylphenol               | 100  | active | active   | active   | inactive | inactive | Redox        |  |  |
| 9-Phenanthrol                        | 100  | active | active   | active   | inactive | inactive | Redox        |  |  |



|                                         |      |        |          |          |          |          |          |  |  |
|-----------------------------------------|------|--------|----------|----------|----------|----------|----------|--|--|
| Carminic acid                           | 100  | active | active   | inactive | active   | inactive | Redox    |  |  |
| Napropamide                             | 100  | active | active   | inactive | active   | active   | Redox    |  |  |
| Nitrofurantoin                          | 100  | active | active   | inactive | active   | inactive | Redox    |  |  |
| Nitrofurazone                           | 100  | active | active   | active   | inactive | inactive | Redox    |  |  |
| PharmaGSID_48513                        | 81.6 | active | active   | inactive | active   | active   | Redox    |  |  |
| 17beta-Trenbolone                       | 100  | active | inactive | inactive | inactive | inactive | Inactive |  |  |
| 17-Methyltestosterone                   | 100  | active | inactive | inactive | inactive | inactive | Inactive |  |  |
| 2-(Phenylmethylene)octanal              | 100  | active | inactive | inactive | inactive | inactive | Inactive |  |  |
| 2,4-Diaminotoluene                      | 100  | active | inactive | inactive | inactive | inactive | Inactive |  |  |
| 2-Phenylphenol                          | 100  | active | inactive | inactive | inactive | inactive | Inactive |  |  |
| 3,3'-Dimethoxybenzidine dihydrochloride | 100  | active | inactive | inactive | inactive | inactive | Inactive |  |  |
| 3,7-Dimethyl-2,6-octadienal             | 100  | active | inactive | inactive | inactive | inactive | Inactive |  |  |
| 4-Aminoazobenzene                       | 100  | active | inactive | inactive | inactive | inactive | Inactive |  |  |
| 5alpha-Dihydrotestosterone              | 100  | active | inactive | inactive | inactive | inactive | Inactive |  |  |
| Acetochlor                              | 100  | active | inactive | inactive | inactive | inactive | Inactive |  |  |
| Ametryn                                 | 100  | active | inactive | inactive | inactive | inactive | Inactive |  |  |
| Amitraz                                 | 100  | active | inactive | inactive | inactive | inactive | Inactive |  |  |
| Bensulide                               | 100  | active | inactive | inactive | inactive | inactive | Inactive |  |  |
| Buprofezin                              | 100  | active | inactive | inactive | inactive | inactive | Inactive |  |  |
| CI-1029                                 | 100  | active | inactive | inactive | inactive | inactive | Inactive |  |  |
| CI-959                                  | 100  | active | inactive | inactive | inactive | inactive | Inactive |  |  |
| CP-457920                               | 100  | active | inactive | inactive | inactive | inactive | Inactive |  |  |
| Cyhalofop-butyl                         | 99.6 | active | inactive | inactive | inactive | inactive | Inactive |  |  |
| Disulfiram                              | 100  | active | inactive | inactive | inactive | inactive | Inactive |  |  |
| Disulfoton                              | 100  | active | inactive | inactive | inactive | inactive | Inactive |  |  |
| Fandosentan potassium salt              | 50   | active | inactive | inactive | inactive | inactive | Inactive |  |  |
| Fenbuconazole                           | 100  | active | inactive | inactive | inactive | inactive | Inactive |  |  |
| Fipronil                                | 100  | active | inactive | inactive | inactive | inactive | Inactive |  |  |
| Fluazifop-butyl                         | 100  | active | inactive | inactive | inactive | inactive | Inactive |  |  |
| Molinate                                | 100  | active | inactive | inactive | inactive | inactive | Inactive |  |  |
| Myclobutanil                            | 100  | active | inactive | inactive | inactive | inactive | Inactive |  |  |
| Nelivaptan                              | 100  | active | inactive | inactive | inactive | inactive | Inactive |  |  |
| Oxadiazon                               | 100  | active | inactive | inactive | inactive | inactive | Inactive |  |  |
| Perfluorodecanoic acid                  | 100  | active | inactive | inactive | inactive | inactive | Inactive |  |  |
| Perfluoroundecanoic acid                | 100  | active | inactive | inactive | inactive | inactive | Inactive |  |  |
| Pirimiphos-methyl                       | 100  | active | inactive | inactive | inactive | inactive | Inactive |  |  |
| Pirinixic acid                          | 100  | active | inactive | inactive | inactive | inactive | Inactive |  |  |
| Profenofos                              | 49.8 | active | inactive | inactive | inactive | inactive | Inactive |  |  |
| Pyriproxyfen                            | 100  | active | inactive | inactive | inactive | inactive | Inactive |  |  |
| Resmethrin                              | 100  | active | inactive | inactive | inactive | inactive | Inactive |  |  |
| Ro 23-7637                              | 100  | active | inactive | inactive | inactive | inactive | Inactive |  |  |

|                                                                                   |      |          |          |          |          |          |          |  |  |
|-----------------------------------------------------------------------------------|------|----------|----------|----------|----------|----------|----------|--|--|
| SAR115740                                                                         | 100  | active   | inactive | inactive | inactive | inactive | Inactive |  |  |
| Tetrac                                                                            | 10.8 | active   | inactive | inactive | inactive | inactive | Inactive |  |  |
| Triclopyr                                                                         | 102  | active   | inactive | inactive | inactive | inactive | Inactive |  |  |
| (2S,3S)-3-Methyl-2-(3-oxo-1,2-benzothiazol-2(3H)-yl)pentanoic acid                | 100  | inactive |          |          |          |          |          |  |  |
| (2Z)-3,7-Dimethylocta-2,6-dien-1-ol                                               | 100  | inactive |          |          |          |          |          |  |  |
| (E)-Anethole                                                                      | 100  | inactive |          |          |          |          |          |  |  |
| 1-(Hydroxymethyl)-5,5-dimethylhydantoin                                           | 100  | inactive |          |          |          |          |          |  |  |
| 1,2,3-Benzotriazole                                                               | 100  | inactive |          |          |          |          |          |  |  |
| 1,2,3-Trichlorobenzene                                                            | 100  | inactive |          |          |          |          |          |  |  |
| 1,2,3-Trichloropropane                                                            | 100  | inactive |          |          |          |          |          |  |  |
| 1,2,4,5-Tetrachlorobenzene                                                        | 100  | inactive |          |          |          |          |          |  |  |
| 1,2,4-Trichlorobenzene                                                            | 100  | inactive |          |          |          |          |          |  |  |
| 1,2,4-Trimethylbenzene                                                            | 104  | inactive |          |          |          |          |          |  |  |
| 1,2-Benzenedicarboxaldehyde                                                       | 100  | inactive |          |          |          |          |          |  |  |
| 1,2-Benzenedicarboxylic acid, di-C9-11-branched alkyl esters, C10-rich            | 100  | inactive |          |          |          |          |          |  |  |
| 1,2-Benzisothiazolin-3-one                                                        | 100  | inactive |          |          |          |          |          |  |  |
| 1,2-Dichlorobenzene                                                               | 100  | inactive |          |          |          |          |          |  |  |
| 1,2-Dimethyl-3-nitrobenzene                                                       | 100  | inactive |          |          |          |          |          |  |  |
| 1,2-Dimethyl-4-nitrobenzene                                                       | 100  | inactive |          |          |          |          |          |  |  |
| 1,2-Diphenylhydrazine                                                             | 100  | inactive |          |          |          |          |          |  |  |
| 1,2-Phenylenediamine                                                              | 100  | inactive |          |          |          |          |          |  |  |
| 1,2-Propylene glycol                                                              | 100  | inactive |          |          |          |          |          |  |  |
| 1,3-Benzenedicarboxylic acid                                                      | 100  | inactive |          |          |          |          |          |  |  |
| 1,3-Butanediol                                                                    | 100  | inactive |          |          |          |          |          |  |  |
| 1,3-Dibromo-5,5-dimethylhydantoin                                                 | 100  | inactive |          |          |          |          |          |  |  |
| 1,3-Dichloro-2-propanol                                                           | 100  | inactive |          |          |          |          |          |  |  |
| 1,3-Dichloro-5,5-dimethylhydantoin                                                | 100  | inactive |          |          |          |          |          |  |  |
| 1,3-Dichloro-6,7,8,9,10,12-hexahydroazepino[2,1-b]quinazoline hydrochloride (1:1) | 50   | inactive |          |          |          |          |          |  |  |
| 1,3-Dichlorobenzene                                                               | 100  | inactive |          |          |          |          |          |  |  |
| 1,3-Diisopropylbenzene                                                            | 100  | inactive |          |          |          |          |          |  |  |
| 1,3-Dinitrobenzene                                                                | 104  | inactive |          |          |          |          |          |  |  |
| 1,3-Diphenylguanidine                                                             | 100  | inactive |          |          |          |          |          |  |  |
| 1,3-Propane sultone                                                               | 100  | inactive |          |          |          |          |          |  |  |
| 1,4-Dichlorobenzene                                                               | 100  | inactive |          |          |          |          |          |  |  |
| 1,5,9-Cyclododecatriene                                                           | 100  | inactive |          |          |          |          |          |  |  |
| 1-[3-(Triethoxysilyl)propyl]urea                                                  | 100  | inactive |          |          |          |          |          |  |  |
| 17alpha-Hydroxyprogesterone                                                       | 100  | inactive |          |          |          |          |          |  |  |
| 1-Benzylquinolinium chloride                                                      | 100  | inactive |          |          |          |          |          |  |  |
| 1-Chloro-4-nitrobenzene                                                           | 100  | inactive |          |          |          |          |          |  |  |
| 1-Decanol                                                                         | 100  | inactive |          |          |          |          |          |  |  |
| 1-Dodecanol                                                                       | 100  | inactive |          |          |          |          |          |  |  |

|                                               |      |          |  |  |  |  |  |  |  |
|-----------------------------------------------|------|----------|--|--|--|--|--|--|--|
| 1H,1H,2H,2H-Perfluorooctyl iodide             | 25   | inactive |  |  |  |  |  |  |  |
| 1H-1,2,4-Triazole                             | 100  | inactive |  |  |  |  |  |  |  |
| 1-Hexadecanol                                 | 50   | inactive |  |  |  |  |  |  |  |
| 1-Hydroxypyrene                               | 100  | inactive |  |  |  |  |  |  |  |
| 1-Methoxy-2-propanol                          | 100  | inactive |  |  |  |  |  |  |  |
| 1-Methylnaphthalene                           | 100  | inactive |  |  |  |  |  |  |  |
| 1-Octanol                                     | 103  | inactive |  |  |  |  |  |  |  |
| 1-Pentadecanol                                | 100  | inactive |  |  |  |  |  |  |  |
| 1-Tetradecanol                                | 100  | inactive |  |  |  |  |  |  |  |
| 1-Tetradecene                                 | 100  | inactive |  |  |  |  |  |  |  |
| 1-Tridecanol                                  | 103  | inactive |  |  |  |  |  |  |  |
| 2-(2-Butoxyethoxy)ethanol                     | 100  | inactive |  |  |  |  |  |  |  |
| 2-(2-Ethoxyethoxy)ethanol                     | 100  | inactive |  |  |  |  |  |  |  |
| 2-(Butan-2-yl)phenol                          | 100  | inactive |  |  |  |  |  |  |  |
| 2-(Hydroxymethyl)-2-nitro-1,3-propanediol     | 100  | inactive |  |  |  |  |  |  |  |
| 2,2,4-Trimethyl-1,3-pentanediol diisobutyrate | 100  | inactive |  |  |  |  |  |  |  |
| 2,2'-[Ethane-1,2-diylbis(oxy)]diethanamine    | 100  | inactive |  |  |  |  |  |  |  |
| 2,2-Dibromo-3-nitrilopropionamide             | 100  | inactive |  |  |  |  |  |  |  |
| 2,3,6-Trimethylphenol                         | 100  | inactive |  |  |  |  |  |  |  |
| 2,3-Benzofuran                                | 100  | inactive |  |  |  |  |  |  |  |
| 2,3-Diaminotoluene                            | 100  | inactive |  |  |  |  |  |  |  |
| 2',3'-Dideoxyinosine                          | 100  | inactive |  |  |  |  |  |  |  |
| 2,3-Dinitrotoluene                            | 71.6 | inactive |  |  |  |  |  |  |  |
| 2,4,6-Trimethylphenol                         | 100  | inactive |  |  |  |  |  |  |  |
| 2,4-Dichlorophenol                            | 100  | inactive |  |  |  |  |  |  |  |
| 2,4-Dichlorophenoxyacetic acid                | 100  | inactive |  |  |  |  |  |  |  |
| 2,4-Dimethylphenol                            | 103  | inactive |  |  |  |  |  |  |  |
| 2,4-Dinitrotoluene                            | 100  | inactive |  |  |  |  |  |  |  |
| 2,4-Di-tert-butylphenol                       | 100  | inactive |  |  |  |  |  |  |  |
| 2,5-Dimethyl-2,5-di-(tert-butylperoxy)hexane  | 100  | inactive |  |  |  |  |  |  |  |
| 2,5-Dimethylphenol                            | 103  | inactive |  |  |  |  |  |  |  |
| 2,6,10-Trimethyl-2,6,10-triazaundecane        | 100  | inactive |  |  |  |  |  |  |  |
| 2,6-Diethylaniline                            | 100  | inactive |  |  |  |  |  |  |  |
| 2,6-Dimethylaniline                           | 103  | inactive |  |  |  |  |  |  |  |
| 2,6-Dimethylphenol                            | 100  | inactive |  |  |  |  |  |  |  |
| 2,6-Dinitrotoluene                            | 100  | inactive |  |  |  |  |  |  |  |
| 2,6-Di-tert-butylphenol                       | 100  | inactive |  |  |  |  |  |  |  |
| 2-[2-(2-Ethoxyethoxy)ethoxy]ethanol           | 100  | inactive |  |  |  |  |  |  |  |
| 2-Aminoanthraquinone                          | 100  | inactive |  |  |  |  |  |  |  |
| 2-Anisidine                                   | 101  | inactive |  |  |  |  |  |  |  |
| 2-Butanone oxime                              | 100  | inactive |  |  |  |  |  |  |  |

|                                           |     |          |  |  |  |  |  |  |  |
|-------------------------------------------|-----|----------|--|--|--|--|--|--|--|
| 2-Butoxyethanol                           | 100 | inactive |  |  |  |  |  |  |  |
| 2-Chloroacetophenone                      | 100 | inactive |  |  |  |  |  |  |  |
| 2-Chloroethanol                           | 100 | inactive |  |  |  |  |  |  |  |
| 2E,4E-Hexadienoic acid                    | 100 | inactive |  |  |  |  |  |  |  |
| 2-Ethoxyethanol                           | 100 | inactive |  |  |  |  |  |  |  |
| 2-Ethyl-1-hexanol                         | 100 | inactive |  |  |  |  |  |  |  |
| 2-Ethylhexanoic acid                      | 100 | inactive |  |  |  |  |  |  |  |
| 2-Hexyloxyethanol                         | 100 | inactive |  |  |  |  |  |  |  |
| 2-Mercaptobenzothiazole                   | 100 | inactive |  |  |  |  |  |  |  |
| 2-Methoxy-5-methylaniline                 | 100 | inactive |  |  |  |  |  |  |  |
| 2-Methoxy-5-nitroaniline                  | 100 | inactive |  |  |  |  |  |  |  |
| 2-Methoxyethanol                          | 100 | inactive |  |  |  |  |  |  |  |
| 2-Methyl-2,4-pentanediol                  | 105 | inactive |  |  |  |  |  |  |  |
| 2-Methyl-5-nitroaniline                   | 100 | inactive |  |  |  |  |  |  |  |
| 2-Methylaniline                           | 100 | inactive |  |  |  |  |  |  |  |
| 2-Naphthalenol                            | 100 | inactive |  |  |  |  |  |  |  |
| 2-Naphthylamine                           | 100 | inactive |  |  |  |  |  |  |  |
| 2-Norbornene-5,6-dicarboxylic anhydride   | 100 | inactive |  |  |  |  |  |  |  |
| 2-Phenoxyethanol                          | 100 | inactive |  |  |  |  |  |  |  |
| 2-tert-Butylphenol                        | 100 | inactive |  |  |  |  |  |  |  |
| 3,3'-Dimethoxybenzidine                   | 100 | inactive |  |  |  |  |  |  |  |
| 3,3'-Dimethylbenzidine                    | 100 | inactive |  |  |  |  |  |  |  |
| 3,4-Diaminotoluene                        | 100 | inactive |  |  |  |  |  |  |  |
| 3,4-Dichloronitrobenzene                  | 100 | inactive |  |  |  |  |  |  |  |
| 3,4-Dimethylphenol                        | 103 | inactive |  |  |  |  |  |  |  |
| 3'-Azido-3'-deoxythymidine                | 100 | inactive |  |  |  |  |  |  |  |
| 3-Bromo-1-propanol                        | 100 | inactive |  |  |  |  |  |  |  |
| 3-Hydroxyfluorene                         | 100 | inactive |  |  |  |  |  |  |  |
| 3-Methylaniline                           | 100 | inactive |  |  |  |  |  |  |  |
| 3-Methylbutyl acetate                     | 100 | inactive |  |  |  |  |  |  |  |
| 3-Nitrotoluene                            | 100 | inactive |  |  |  |  |  |  |  |
| 3-Phenoxybenzoic acid                     | 100 | inactive |  |  |  |  |  |  |  |
| 3-Pyridinecarbonitrile                    | 100 | inactive |  |  |  |  |  |  |  |
| 4-(2-Methylbutan-2-yl)cyclohexanol        | 100 | inactive |  |  |  |  |  |  |  |
| 4,4'-Bipyridine                           | 100 | inactive |  |  |  |  |  |  |  |
| 4,4'-Diamino-3,3'-dimethyldiphenylmethane | 100 | inactive |  |  |  |  |  |  |  |
| 4,4'-Diaminobiphenyl methane              | 100 | inactive |  |  |  |  |  |  |  |
| 4,4'-Methylenebis(N,N-dimethylaniline)    | 100 | inactive |  |  |  |  |  |  |  |
| 4,4'-Oxydianiline                         | 100 | inactive |  |  |  |  |  |  |  |
| 4-Amino-1,2,4-triazole                    | 100 | inactive |  |  |  |  |  |  |  |
| 4-Aminobenzoic acid                       | 100 | inactive |  |  |  |  |  |  |  |

|                                       |     |          |  |  |  |  |  |  |  |
|---------------------------------------|-----|----------|--|--|--|--|--|--|--|
| 4-Aminofolic acid                     | 100 | inactive |  |  |  |  |  |  |  |
| 4-Butyrolactone                       | 100 | inactive |  |  |  |  |  |  |  |
| 4-Chloro-1,2-diaminobenzene           | 100 | inactive |  |  |  |  |  |  |  |
| 4-Chloro-3-methylphenol               | 100 | inactive |  |  |  |  |  |  |  |
| 4-Chloroaniline                       | 102 | inactive |  |  |  |  |  |  |  |
| 4-Chlorobenzotrichloride              | 100 | inactive |  |  |  |  |  |  |  |
| 4-Ethyl-1-yn-3-ol                     | 100 | inactive |  |  |  |  |  |  |  |
| 4-Hydroxy-3-methoxybenzaldehyde       | 100 | inactive |  |  |  |  |  |  |  |
| 4-Hydroxytamoxifen                    | 30  | inactive |  |  |  |  |  |  |  |
| 4-Methyl-2-pentanol                   | 100 | inactive |  |  |  |  |  |  |  |
| 4-Methylaniline                       | 100 | inactive |  |  |  |  |  |  |  |
| 4-Nitroaniline                        | 100 | inactive |  |  |  |  |  |  |  |
| 4-Nitrobenzoic acid                   | 100 | inactive |  |  |  |  |  |  |  |
| 4-Nitrotoluene                        | 100 | inactive |  |  |  |  |  |  |  |
| 4-Nonylphenol                         | 100 | inactive |  |  |  |  |  |  |  |
| 4-Pentylaniline                       | 100 | inactive |  |  |  |  |  |  |  |
| 4-Vinyl-1-cyclohexene dioxide         | 100 | inactive |  |  |  |  |  |  |  |
| 5,5-Dimethylhydantoin                 | 101 | inactive |  |  |  |  |  |  |  |
| 5,5-Diphenylhydantoin                 | 100 | inactive |  |  |  |  |  |  |  |
| 5-Chloro-2-methyl-3(2H)-isothiazolone | 100 | inactive |  |  |  |  |  |  |  |
| 5-Fluorouracil                        | 102 | inactive |  |  |  |  |  |  |  |
| 6:2 Fluorotelomer alcohol             | 100 | inactive |  |  |  |  |  |  |  |
| 6:2 Fluorotelomer methacrylate        | 100 | inactive |  |  |  |  |  |  |  |
| 6-Methyl-2-thiouracil                 | 100 | inactive |  |  |  |  |  |  |  |
| 6-Methylquinoline                     | 100 | inactive |  |  |  |  |  |  |  |
| 6-Propyl-2-thiouracil                 | 100 | inactive |  |  |  |  |  |  |  |
| 6-Thioguanine                         | 100 | inactive |  |  |  |  |  |  |  |
| 8:2 Fluorotelomer alcohol             | 100 | inactive |  |  |  |  |  |  |  |
| 8-Hydroxyquinoline                    | 100 | inactive |  |  |  |  |  |  |  |
| Acenaphthene                          | 100 | inactive |  |  |  |  |  |  |  |
| Acenaphthylene                        | 100 | inactive |  |  |  |  |  |  |  |
| Acephate                              | 100 | inactive |  |  |  |  |  |  |  |
| Acetamide                             | 100 | inactive |  |  |  |  |  |  |  |
| Acetaminophen                         | 100 | inactive |  |  |  |  |  |  |  |
| Acetamiprid                           | 100 | inactive |  |  |  |  |  |  |  |
| Acetic acid                           | 100 | inactive |  |  |  |  |  |  |  |
| Acetophenone                          | 100 | inactive |  |  |  |  |  |  |  |
| Acetyl tributyl citrate               | 100 | inactive |  |  |  |  |  |  |  |
| Acetyltriethyl citrate                | 100 | inactive |  |  |  |  |  |  |  |
| Acibenzolar-S-methyl                  | 100 | inactive |  |  |  |  |  |  |  |
| Acrylamide                            | 100 | inactive |  |  |  |  |  |  |  |

|                                           |      |          |  |  |  |  |  |  |  |
|-------------------------------------------|------|----------|--|--|--|--|--|--|--|
| Adipic acid, polypropyleneglycol, laurate | 5000 | inactive |  |  |  |  |  |  |  |
| Aldicarb                                  | 100  | inactive |  |  |  |  |  |  |  |
| Aldicarb oxime                            | 100  | inactive |  |  |  |  |  |  |  |
| Aldrin                                    | 100  | inactive |  |  |  |  |  |  |  |
| all-trans-Retinoic acid                   | 100  | inactive |  |  |  |  |  |  |  |
| alpha-Cyclodextrin                        | 52.4 | inactive |  |  |  |  |  |  |  |
| alpha-Isomethylionone                     | 100  | inactive |  |  |  |  |  |  |  |
| Amiodarone hydrochloride                  | 100  | inactive |  |  |  |  |  |  |  |
| Ammonium carbamate                        | 100  | inactive |  |  |  |  |  |  |  |
| Ammonium perfluorooctanoate               | 100  | inactive |  |  |  |  |  |  |  |
| Anilazine                                 | 100  | inactive |  |  |  |  |  |  |  |
| Anthracene                                | 100  | inactive |  |  |  |  |  |  |  |
| Anthralin                                 | 100  | inactive |  |  |  |  |  |  |  |
| Aplaviroc hydrochloride                   | 100  | inactive |  |  |  |  |  |  |  |
| Aspirin                                   | 100  | inactive |  |  |  |  |  |  |  |
| Asulam                                    | 100  | inactive |  |  |  |  |  |  |  |
| Atrazine                                  | 100  | inactive |  |  |  |  |  |  |  |
| AVE2865                                   | 50   | inactive |  |  |  |  |  |  |  |
| AVE3247                                   | 24   | inactive |  |  |  |  |  |  |  |
| AVE3295                                   | 86.4 | inactive |  |  |  |  |  |  |  |
| AVE6324                                   | 100  | inactive |  |  |  |  |  |  |  |
| AVE9423                                   | 100  | inactive |  |  |  |  |  |  |  |
| Azamethiphos                              | 100  | inactive |  |  |  |  |  |  |  |
| Azathioprine                              | 99.4 | inactive |  |  |  |  |  |  |  |
| Azinphos-methyl                           | 100  | inactive |  |  |  |  |  |  |  |
| Azobenzene                                | 100  | inactive |  |  |  |  |  |  |  |
| Bendiocarb                                | 100  | inactive |  |  |  |  |  |  |  |
| Benfluralin                               | 100  | inactive |  |  |  |  |  |  |  |
| Benodanil                                 | 100  | inactive |  |  |  |  |  |  |  |
| Benomyl                                   | 100  | inactive |  |  |  |  |  |  |  |
| Bentazone                                 | 100  | inactive |  |  |  |  |  |  |  |
| Benz(a)anthracene                         | 100  | inactive |  |  |  |  |  |  |  |
| Benzal chloride                           | 100  | inactive |  |  |  |  |  |  |  |
| Benzidine                                 | 100  | inactive |  |  |  |  |  |  |  |
| Benzo(b)fluoranthene                      | 100  | inactive |  |  |  |  |  |  |  |
| Benzoic acid                              | 103  | inactive |  |  |  |  |  |  |  |
| Benzophenone                              | 100  | inactive |  |  |  |  |  |  |  |
| Benzotrichloride                          | 100  | inactive |  |  |  |  |  |  |  |
| Benzyl alcohol                            | 100  | inactive |  |  |  |  |  |  |  |
| Benzyl butyl phthalate                    | 100  | inactive |  |  |  |  |  |  |  |
| Benzylloctyl adipate                      | 100  | inactive |  |  |  |  |  |  |  |

|                                           |       |          |  |  |  |  |  |  |  |
|-------------------------------------------|-------|----------|--|--|--|--|--|--|--|
| beta-Hexachlorocyclohexane                | 100   | inactive |  |  |  |  |  |  |  |
| Bifenazate                                | 100   | inactive |  |  |  |  |  |  |  |
| Bifenthrin                                | 100   | inactive |  |  |  |  |  |  |  |
| Biphenyl                                  | 100   | inactive |  |  |  |  |  |  |  |
| Bis(2-chloroethyl) ether                  | 100   | inactive |  |  |  |  |  |  |  |
| Bis(2-ethylhexyl) decanedioate            | 100   | inactive |  |  |  |  |  |  |  |
| Bis(2-ethylhexyl) nonanedioate            | 100   | inactive |  |  |  |  |  |  |  |
| Bis(2-ethylhexyl) terephthalate           | 100   | inactive |  |  |  |  |  |  |  |
| Bis(2-ethylhexyl)hexanedioate             | 100   | inactive |  |  |  |  |  |  |  |
| Boric acid (H3BO3)                        | 100   | inactive |  |  |  |  |  |  |  |
| Boscalid                                  | 100   | inactive |  |  |  |  |  |  |  |
| Bromacil                                  | 100   | inactive |  |  |  |  |  |  |  |
| Bronopol                                  | 100   | inactive |  |  |  |  |  |  |  |
| Busulfan                                  | 100   | inactive |  |  |  |  |  |  |  |
| Butachlor                                 | 100   | inactive |  |  |  |  |  |  |  |
| Butafenacil                               | 100   | inactive |  |  |  |  |  |  |  |
| Butanoic acid                             | 100   | inactive |  |  |  |  |  |  |  |
| Butralin                                  | 100   | inactive |  |  |  |  |  |  |  |
| Butyl benzoate                            | 100   | inactive |  |  |  |  |  |  |  |
| Butylate                                  | 100   | inactive |  |  |  |  |  |  |  |
| Butylbenzene                              | 100   | inactive |  |  |  |  |  |  |  |
| Butyryl trihexyl citrate                  | 100   | inactive |  |  |  |  |  |  |  |
| C.I. Solvent Yellow 14                    | 100   | inactive |  |  |  |  |  |  |  |
| C10-21 alkanesulfonic acids phenyl esters | 50000 | inactive |  |  |  |  |  |  |  |
| Caffeine                                  | 100   | inactive |  |  |  |  |  |  |  |
| Caprolactam                               | 100   | inactive |  |  |  |  |  |  |  |
| Captafol                                  | 100   | inactive |  |  |  |  |  |  |  |
| Carabersat                                | 97.5  | inactive |  |  |  |  |  |  |  |
| Carbamazepine                             | 100   | inactive |  |  |  |  |  |  |  |
| Carbaryl                                  | 100   | inactive |  |  |  |  |  |  |  |
| Carbendazim                               | 100   | inactive |  |  |  |  |  |  |  |
| Carbofuran                                | 100   | inactive |  |  |  |  |  |  |  |
| Carbosulfan                               | 100   | inactive |  |  |  |  |  |  |  |
| Carfentrazone-ethyl                       | 100   | inactive |  |  |  |  |  |  |  |
| Cariporide mesylate                       | 74.7  | inactive |  |  |  |  |  |  |  |
| Catechol                                  | 100   | inactive |  |  |  |  |  |  |  |
| Celecoxib                                 | 100   | inactive |  |  |  |  |  |  |  |
| Chloramben                                | 100   | inactive |  |  |  |  |  |  |  |
| Chlordane                                 | 100   | inactive |  |  |  |  |  |  |  |
| Chlorendic acid                           | 100   | inactive |  |  |  |  |  |  |  |
| Chlorethoxyfos                            | 100   | inactive |  |  |  |  |  |  |  |

|                              |       |          |  |  |  |  |  |  |  |
|------------------------------|-------|----------|--|--|--|--|--|--|--|
| Chloridazon                  | 100   | inactive |  |  |  |  |  |  |  |
| Chlorobenzilate              | 100   | inactive |  |  |  |  |  |  |  |
| Chloroneb                    | 100   | inactive |  |  |  |  |  |  |  |
| Chlorpromazine hydrochloride | 100   | inactive |  |  |  |  |  |  |  |
| Chlorpropham                 | 100   | inactive |  |  |  |  |  |  |  |
| Chlorpyrifos                 | 100   | inactive |  |  |  |  |  |  |  |
| Chlorthal-dimethyl           | 99.9  | inactive |  |  |  |  |  |  |  |
| CI-1018                      | 100   | inactive |  |  |  |  |  |  |  |
| CI-1044                      | 100   | inactive |  |  |  |  |  |  |  |
| Cinmethylin                  | 100   | inactive |  |  |  |  |  |  |  |
| Citric acid                  | 100   | inactive |  |  |  |  |  |  |  |
| Citronellol                  | 100   | inactive |  |  |  |  |  |  |  |
| Cladribine                   | 100   | inactive |  |  |  |  |  |  |  |
| Clodinafop-propargyl         | 100   | inactive |  |  |  |  |  |  |  |
| Clofentezine                 | 100   | inactive |  |  |  |  |  |  |  |
| Clofibrate                   | 100   | inactive |  |  |  |  |  |  |  |
| Clomazone                    | 100   | inactive |  |  |  |  |  |  |  |
| Cloprop                      | 100   | inactive |  |  |  |  |  |  |  |
| Clopyralid                   | 100   | inactive |  |  |  |  |  |  |  |
| Clopyralid-olamine           | 100   | inactive |  |  |  |  |  |  |  |
| Clothianidin                 | 100   | inactive |  |  |  |  |  |  |  |
| Clotrimazole                 | 100   | inactive |  |  |  |  |  |  |  |
| Clove leaf oil               | 26100 | inactive |  |  |  |  |  |  |  |
| Colchicine                   | 100   | inactive |  |  |  |  |  |  |  |
| Cotinine                     | 100   | inactive |  |  |  |  |  |  |  |
| Coumaphos                    | 100   | inactive |  |  |  |  |  |  |  |
| Coumarin                     | 100   | inactive |  |  |  |  |  |  |  |
| CP-114271                    | 100   | inactive |  |  |  |  |  |  |  |
| CP-122721                    | 100   | inactive |  |  |  |  |  |  |  |
| CP-283097                    | 50    | inactive |  |  |  |  |  |  |  |
| CP-409092                    | 100   | inactive |  |  |  |  |  |  |  |
| CP-422935                    | 100   | inactive |  |  |  |  |  |  |  |
| CP-456773                    | 100   | inactive |  |  |  |  |  |  |  |
| CP-465394                    | 50    | inactive |  |  |  |  |  |  |  |
| CP-471358                    | 100   | inactive |  |  |  |  |  |  |  |
| CP-532623                    | 100   | inactive |  |  |  |  |  |  |  |
| CP-607366                    | 100   | inactive |  |  |  |  |  |  |  |
| CP-608039                    | 92.8  | inactive |  |  |  |  |  |  |  |
| CP-612372                    | 100   | inactive |  |  |  |  |  |  |  |
| CP-634384                    | 100   | inactive |  |  |  |  |  |  |  |
| CP-642931                    | 50    | inactive |  |  |  |  |  |  |  |



|                                 |      |          |  |  |  |  |  |  |  |
|---------------------------------|------|----------|--|--|--|--|--|--|--|
| CP-671305                       | 100  | inactive |  |  |  |  |  |  |  |
| CP-728663                       | 100  | inactive |  |  |  |  |  |  |  |
| Cumene hydroperoxide            | 100  | inactive |  |  |  |  |  |  |  |
| Cyanamide                       | 99.9 | inactive |  |  |  |  |  |  |  |
| Cyanazine                       | 100  | inactive |  |  |  |  |  |  |  |
| Cyanuric acid                   | 99.4 | inactive |  |  |  |  |  |  |  |
| Cyclohexanol                    | 100  | inactive |  |  |  |  |  |  |  |
| Cyclohexanone                   | 100  | inactive |  |  |  |  |  |  |  |
| Cycloheximide                   | 100  | inactive |  |  |  |  |  |  |  |
| Cyclohexylamine                 | 100  | inactive |  |  |  |  |  |  |  |
| Cyclohexylphenylketone          | 100  | inactive |  |  |  |  |  |  |  |
| Cyclopamine                     | 100  | inactive |  |  |  |  |  |  |  |
| Cyclophosphamide monohydrate    | 100  | inactive |  |  |  |  |  |  |  |
| Cyfluthrin                      | 100  | inactive |  |  |  |  |  |  |  |
| Cymoxanil                       | 100  | inactive |  |  |  |  |  |  |  |
| Cypermethrin                    | 100  | inactive |  |  |  |  |  |  |  |
| Cyprodinil                      | 100  | inactive |  |  |  |  |  |  |  |
| Cyromazine                      | 100  | inactive |  |  |  |  |  |  |  |
| Cytarabine hydrochloride        | 100  | inactive |  |  |  |  |  |  |  |
| Daidzein                        | 100  | inactive |  |  |  |  |  |  |  |
| Dalapon                         | 100  | inactive |  |  |  |  |  |  |  |
| Daminozide                      | 100  | inactive |  |  |  |  |  |  |  |
| Dapsone                         | 100  | inactive |  |  |  |  |  |  |  |
| Darbufelone mesylate            | 50   | inactive |  |  |  |  |  |  |  |
| Dazomet                         | 100  | inactive |  |  |  |  |  |  |  |
| DEET                            | 100  | inactive |  |  |  |  |  |  |  |
| Deisopropylatrazine             | 100  | inactive |  |  |  |  |  |  |  |
| Dexamethasone sodium phosphate  | 100  | inactive |  |  |  |  |  |  |  |
| Di(2-ethylhexyl) phthalate      | 100  | inactive |  |  |  |  |  |  |  |
| Di(propylene glycol) dibenzoate | 100  | inactive |  |  |  |  |  |  |  |
| Diacetone alcohol               | 100  | inactive |  |  |  |  |  |  |  |
| Diazinon                        | 100  | inactive |  |  |  |  |  |  |  |
| Diazoxon                        | 100  | inactive |  |  |  |  |  |  |  |
| Dibenzofuran                    | 100  | inactive |  |  |  |  |  |  |  |
| Dibromoacetonitrile             | 100  | inactive |  |  |  |  |  |  |  |
| Dibutyl adipate                 | 100  | inactive |  |  |  |  |  |  |  |
| Dibutyl decanedioate            | 100  | inactive |  |  |  |  |  |  |  |
| Dibutyl phthalate               | 100  | inactive |  |  |  |  |  |  |  |
| Dicamba                         | 100  | inactive |  |  |  |  |  |  |  |
| Dichlobenil                     | 100  | inactive |  |  |  |  |  |  |  |
| Dichloroacetic acid             | 100  | inactive |  |  |  |  |  |  |  |

|                                          |      |          |  |  |  |  |  |  |  |
|------------------------------------------|------|----------|--|--|--|--|--|--|--|
| Dichlorodiphenyltrichloroethane          | 100  | inactive |  |  |  |  |  |  |  |
| Dichlorprop                              | 100  | inactive |  |  |  |  |  |  |  |
| Dichlorvos                               | 49.8 | inactive |  |  |  |  |  |  |  |
| Diclofenac sodium                        | 100  | inactive |  |  |  |  |  |  |  |
| Dicloran                                 | 100  | inactive |  |  |  |  |  |  |  |
| Diclosulam                               | 100  | inactive |  |  |  |  |  |  |  |
| Dicofol                                  | 100  | inactive |  |  |  |  |  |  |  |
| Dicrotophos                              | 100  | inactive |  |  |  |  |  |  |  |
| Dicumyl peroxide                         | 100  | inactive |  |  |  |  |  |  |  |
| Dicyclohexyl disulfide                   | 100  | inactive |  |  |  |  |  |  |  |
| Dieldrin                                 | 100  | inactive |  |  |  |  |  |  |  |
| Diethanolamine                           | 100  | inactive |  |  |  |  |  |  |  |
| Diethyl butanedioate                     | 100  | inactive |  |  |  |  |  |  |  |
| Diethyl phthalate                        | 100  | inactive |  |  |  |  |  |  |  |
| Diethyl sulfate                          | 100  | inactive |  |  |  |  |  |  |  |
| Diethylene glycol                        | 100  | inactive |  |  |  |  |  |  |  |
| Diethylene glycol dibenzoate             | 100  | inactive |  |  |  |  |  |  |  |
| Diethylene glycol dimethyl ether         | 100  | inactive |  |  |  |  |  |  |  |
| Diethylene glycol monomethyl ether       | 100  | inactive |  |  |  |  |  |  |  |
| Difpas-pyrazole                          | 100  | inactive |  |  |  |  |  |  |  |
| Dihexyl phthalate                        | 100  | inactive |  |  |  |  |  |  |  |
| Diisobutyl adipate                       | 100  | inactive |  |  |  |  |  |  |  |
| Diisodecyl hexanedioate                  | 100  | inactive |  |  |  |  |  |  |  |
| Diisononyl cyclohexane-1,2-dicarboxylate | 100  | inactive |  |  |  |  |  |  |  |
| Diisopropyl methylphosphonate            | 100  | inactive |  |  |  |  |  |  |  |
| Dimethipin                               | 100  | inactive |  |  |  |  |  |  |  |
| Dimethoate                               | 100  | inactive |  |  |  |  |  |  |  |
| Dimethomorph                             | 100  | inactive |  |  |  |  |  |  |  |
| Dimethoxane                              | 100  | inactive |  |  |  |  |  |  |  |
| Dimethyl adipate                         | 100  | inactive |  |  |  |  |  |  |  |
| Dimethyl glutarate                       | 100  | inactive |  |  |  |  |  |  |  |
| Dimethyl malonate                        | 100  | inactive |  |  |  |  |  |  |  |
| Dimethyl phthalate                       | 100  | inactive |  |  |  |  |  |  |  |
| Dimethyl succinate                       | 100  | inactive |  |  |  |  |  |  |  |
| Dimethyl sulfate                         | 100  | inactive |  |  |  |  |  |  |  |
| Dimethyl terephthalate                   | 100  | inactive |  |  |  |  |  |  |  |
| Dimethylaminoethanol                     | 100  | inactive |  |  |  |  |  |  |  |
| Dimethylarsinic acid                     | 100  | inactive |  |  |  |  |  |  |  |
| Dimethylcarbamoyl chloride               | 99.9 | inactive |  |  |  |  |  |  |  |
| Di-n-octyl phthalate                     | 100  | inactive |  |  |  |  |  |  |  |
| Diethyl sebacate                         | 100  | inactive |  |  |  |  |  |  |  |

|                                               |        |          |  |  |  |  |  |  |  |
|-----------------------------------------------|--------|----------|--|--|--|--|--|--|--|
| Dipentyl phthalate                            | 100    | inactive |  |  |  |  |  |  |  |
| Diphenhydramine hydrochloride                 | 100    | inactive |  |  |  |  |  |  |  |
| Diphenyl isophthalate                         | 100    | inactive |  |  |  |  |  |  |  |
| Diphenylamine                                 | 100    | inactive |  |  |  |  |  |  |  |
| Dipropyl 2,5-pyridinedicarboxylate            | 100    | inactive |  |  |  |  |  |  |  |
| Dipropylene glycol                            | 100    | inactive |  |  |  |  |  |  |  |
| Dipropylene glycol monomethyl ether           | 100    | inactive |  |  |  |  |  |  |  |
| Diquat dibromide monohydrate                  | 50     | inactive |  |  |  |  |  |  |  |
| Di-tert-butyl peroxide                        | 100    | inactive |  |  |  |  |  |  |  |
| Dithiopyr                                     | 99.6   | inactive |  |  |  |  |  |  |  |
| Diuron                                        | 100    | inactive |  |  |  |  |  |  |  |
| D-Mannitol                                    | 100    | inactive |  |  |  |  |  |  |  |
| Dodecylbenzene                                | 100    | inactive |  |  |  |  |  |  |  |
| Dodecylbenzene sulfonate triethanolamine(1:1) | 89.9   | inactive |  |  |  |  |  |  |  |
| Enadoline                                     | 100    | inactive |  |  |  |  |  |  |  |
| Endosulfan                                    | 100    | inactive |  |  |  |  |  |  |  |
| Endothal                                      | 100    | inactive |  |  |  |  |  |  |  |
| Endrin                                        | 100    | inactive |  |  |  |  |  |  |  |
| EPN                                           | 100    | inactive |  |  |  |  |  |  |  |
| EPTC                                          | 100    | inactive |  |  |  |  |  |  |  |
| Erythromycin                                  | 25     | inactive |  |  |  |  |  |  |  |
| Esfenvalerate                                 | 100    | inactive |  |  |  |  |  |  |  |
| Estrone                                       | 100    | inactive |  |  |  |  |  |  |  |
| Ethalfuralin                                  | 100    | inactive |  |  |  |  |  |  |  |
| Ethanolamine                                  | 100    | inactive |  |  |  |  |  |  |  |
| Ethephon                                      | 100    | inactive |  |  |  |  |  |  |  |
| Ethion                                        | 100    | inactive |  |  |  |  |  |  |  |
| Ethoxyquin                                    | 100    | inactive |  |  |  |  |  |  |  |
| Ethyl butyrate                                | 100    | inactive |  |  |  |  |  |  |  |
| Ethyl heptanoate                              | 100    | inactive |  |  |  |  |  |  |  |
| Ethylene glycol                               | 101    | inactive |  |  |  |  |  |  |  |
| Ethylene glycol monoethyl ether acetate       | 100    | inactive |  |  |  |  |  |  |  |
| Ethylene thiourea                             | 100    | inactive |  |  |  |  |  |  |  |
| Ethylparaben                                  | 100    | inactive |  |  |  |  |  |  |  |
| Etofenprox                                    | 100    | inactive |  |  |  |  |  |  |  |
| Etoxazole                                     | 100    | inactive |  |  |  |  |  |  |  |
| Etridiazole                                   | 100    | inactive |  |  |  |  |  |  |  |
| Eugenol                                       | 100    | inactive |  |  |  |  |  |  |  |
| Farglitazar                                   | 0.0896 | inactive |  |  |  |  |  |  |  |
| FD&C Blue No. 1                               | 100    | inactive |  |  |  |  |  |  |  |
| FD&C Yellow 5                                 | 100    | inactive |  |  |  |  |  |  |  |

|                                     |       |          |  |  |  |  |  |  |  |
|-------------------------------------|-------|----------|--|--|--|--|--|--|--|
| FD&C Yellow 6                       | 100   | inactive |  |  |  |  |  |  |  |
| Fenaminosulf                        | 100   | inactive |  |  |  |  |  |  |  |
| Fenarimol                           | 100   | inactive |  |  |  |  |  |  |  |
| Fenitrothion                        | 100   | inactive |  |  |  |  |  |  |  |
| Fenoxaprop-ethyl                    | 100   | inactive |  |  |  |  |  |  |  |
| Fenpropathrin                       | 100   | inactive |  |  |  |  |  |  |  |
| Fenthion                            | 100   | inactive |  |  |  |  |  |  |  |
| Fluconazole                         | 100   | inactive |  |  |  |  |  |  |  |
| Flufenacet                          | 100   | inactive |  |  |  |  |  |  |  |
| Flufenpyr-ethyl                     | 100   | inactive |  |  |  |  |  |  |  |
| Flumetralin                         | 100   | inactive |  |  |  |  |  |  |  |
| Flumetsulam                         | 100   | inactive |  |  |  |  |  |  |  |
| Flumiclorac-pentyl                  | 100   | inactive |  |  |  |  |  |  |  |
| Fluometuron                         | 100   | inactive |  |  |  |  |  |  |  |
| Fluoranthene                        | 100   | inactive |  |  |  |  |  |  |  |
| Fluorene                            | 100   | inactive |  |  |  |  |  |  |  |
| Fluridone                           | 100   | inactive |  |  |  |  |  |  |  |
| Fluroxypyr                          | 100   | inactive |  |  |  |  |  |  |  |
| Fluroxypyr-meptyl                   | 100   | inactive |  |  |  |  |  |  |  |
| Flutamide                           | 100   | inactive |  |  |  |  |  |  |  |
| Fluthiacet-methyl                   | 100   | inactive |  |  |  |  |  |  |  |
| Flutolanil                          | 99.8  | inactive |  |  |  |  |  |  |  |
| Folic acid                          | 100   | inactive |  |  |  |  |  |  |  |
| Folpet                              | 100   | inactive |  |  |  |  |  |  |  |
| Fomesafen                           | 100   | inactive |  |  |  |  |  |  |  |
| Formamide                           | 100   | inactive |  |  |  |  |  |  |  |
| Formetanate hydrochloride           | 101   | inactive |  |  |  |  |  |  |  |
| Fosthiazate                         | 100   | inactive |  |  |  |  |  |  |  |
| FR130739                            | 100   | inactive |  |  |  |  |  |  |  |
| FR145237                            | 88.3  | inactive |  |  |  |  |  |  |  |
| FR167356                            | 100   | inactive |  |  |  |  |  |  |  |
| FR900409                            | 100   | inactive |  |  |  |  |  |  |  |
| Fulvestrant                         | 100   | inactive |  |  |  |  |  |  |  |
| Genistein                           | 100   | inactive |  |  |  |  |  |  |  |
| Geranyl acetate                     | 100   | inactive |  |  |  |  |  |  |  |
| Glutaraldehyde                      | 100   | inactive |  |  |  |  |  |  |  |
| Glycerol                            | 100   | inactive |  |  |  |  |  |  |  |
| Glycidol                            | 100   | inactive |  |  |  |  |  |  |  |
| Glycidyl trimethylammonium chloride | 100   | inactive |  |  |  |  |  |  |  |
| Grinstad Soft-N-Safe                | 50000 | inactive |  |  |  |  |  |  |  |
| GSK232420A                          | 100   | inactive |  |  |  |  |  |  |  |

|                                         |      |          |  |  |  |  |  |  |  |
|-----------------------------------------|------|----------|--|--|--|--|--|--|--|
| GW473178E methyl benzene sulphonic acid | 67.4 | inactive |  |  |  |  |  |  |  |
| Haloperidol                             | 100  | inactive |  |  |  |  |  |  |  |
| Heptachlor                              | 100  | inactive |  |  |  |  |  |  |  |
| Heptachlor epoxide B                    | 100  | inactive |  |  |  |  |  |  |  |
| Heptanoic acid                          | 100  | inactive |  |  |  |  |  |  |  |
| Hexachlorocyclopentadiene               | 100  | inactive |  |  |  |  |  |  |  |
| Hexadecane                              | 100  | inactive |  |  |  |  |  |  |  |
| Hexaflumuron                            | 100  | inactive |  |  |  |  |  |  |  |
| Hexane-1,6-diyl dibenzoate              | 100  | inactive |  |  |  |  |  |  |  |
| Hexanedinitrile                         | 100  | inactive |  |  |  |  |  |  |  |
| Hexanedioic acid                        | 100  | inactive |  |  |  |  |  |  |  |
| Hexanedioic acid, diisononyl ester      | 100  | inactive |  |  |  |  |  |  |  |
| Hexanoic acid                           | 100  | inactive |  |  |  |  |  |  |  |
| Hexazinone                              | 100  | inactive |  |  |  |  |  |  |  |
| Hexythiazox                             | 100  | inactive |  |  |  |  |  |  |  |
| HMR1171 trifluoroacetate (1:1)          | 38.1 | inactive |  |  |  |  |  |  |  |
| Hydrochlorothiazide                     | 100  | inactive |  |  |  |  |  |  |  |
| Hydroquinone                            | 100  | inactive |  |  |  |  |  |  |  |
| Hydroxyurea                             | 100  | inactive |  |  |  |  |  |  |  |
| Icardin                                 | 100  | inactive |  |  |  |  |  |  |  |
| Ilepatril                               | 100  | inactive |  |  |  |  |  |  |  |
| Imazamox                                | 100  | inactive |  |  |  |  |  |  |  |
| Imazapic                                | 100  | inactive |  |  |  |  |  |  |  |
| Imazapyr                                | 100  | inactive |  |  |  |  |  |  |  |
| Imazaquin                               | 100  | inactive |  |  |  |  |  |  |  |
| Imazethapyr                             | 100  | inactive |  |  |  |  |  |  |  |
| Imidacloprid                            | 100  | inactive |  |  |  |  |  |  |  |
| Indium arsenide                         | 100  | inactive |  |  |  |  |  |  |  |
| Indoxacarb                              | 80.2 | inactive |  |  |  |  |  |  |  |
| Ingliforib                              | 100  | inactive |  |  |  |  |  |  |  |
| Iodosulfuron-methyl-sodium              | 99.9 | inactive |  |  |  |  |  |  |  |
| Iprodione                               | 100  | inactive |  |  |  |  |  |  |  |
| Isoeugenol                              | 100  | inactive |  |  |  |  |  |  |  |
| Isoniazid                               | 100  | inactive |  |  |  |  |  |  |  |
| Isooctyl acrylate                       | 100  | inactive |  |  |  |  |  |  |  |
| Isopentyl alcohol                       | 100  | inactive |  |  |  |  |  |  |  |
| Isopentyl butyrate                      | 100  | inactive |  |  |  |  |  |  |  |
| Isophorone                              | 100  | inactive |  |  |  |  |  |  |  |
| Isophorone diisocyanate                 | 100  | inactive |  |  |  |  |  |  |  |
| Isopropalin                             | 100  | inactive |  |  |  |  |  |  |  |
| Isopropyl triethanolamine titanate      | 100  | inactive |  |  |  |  |  |  |  |

|                                                          |      |          |  |  |  |  |  |  |  |
|----------------------------------------------------------|------|----------|--|--|--|--|--|--|--|
| Isoproterenol hydrochloride                              | 100  | inactive |  |  |  |  |  |  |  |
| Isoxaben                                                 | 100  | inactive |  |  |  |  |  |  |  |
| Isoxaflutole                                             | 100  | inactive |  |  |  |  |  |  |  |
| Lactofen                                                 | 100  | inactive |  |  |  |  |  |  |  |
| Levonorgestrel                                           | 100  | inactive |  |  |  |  |  |  |  |
| Lindane                                                  | 100  | inactive |  |  |  |  |  |  |  |
| Lovastatin                                               | 100  | inactive |  |  |  |  |  |  |  |
| L-Tartaric acid                                          | 100  | inactive |  |  |  |  |  |  |  |
| L-Tryptophan                                             | 100  | inactive |  |  |  |  |  |  |  |
| Malaoxon                                                 | 100  | inactive |  |  |  |  |  |  |  |
| Malathion                                                | 100  | inactive |  |  |  |  |  |  |  |
| Maleic hydrazide                                         | 100  | inactive |  |  |  |  |  |  |  |
| Malic acid                                               | 100  | inactive |  |  |  |  |  |  |  |
| Maltol                                                   | 104  | inactive |  |  |  |  |  |  |  |
| Mancozeb                                                 | 50   | inactive |  |  |  |  |  |  |  |
| Maneb                                                    | 100  | inactive |  |  |  |  |  |  |  |
| MCPA                                                     | 100  | inactive |  |  |  |  |  |  |  |
| Mepanipyrim                                              | 100  | inactive |  |  |  |  |  |  |  |
| Mepiquat chloride                                        | 100  | inactive |  |  |  |  |  |  |  |
| Mesotrione                                               | 101  | inactive |  |  |  |  |  |  |  |
| Metam-sodium hydrate                                     | 100  | inactive |  |  |  |  |  |  |  |
| Methacrylamide                                           | 100  | inactive |  |  |  |  |  |  |  |
| Methamidophos                                            | 100  | inactive |  |  |  |  |  |  |  |
| Methenamine                                              | 102  | inactive |  |  |  |  |  |  |  |
| Methidathion                                             | 100  | inactive |  |  |  |  |  |  |  |
| Methimazole                                              | 100  | inactive |  |  |  |  |  |  |  |
| Methomyl                                                 | 100  | inactive |  |  |  |  |  |  |  |
| Methotrexate                                             | 100  | inactive |  |  |  |  |  |  |  |
| Methoxychlor                                             | 99.5 | inactive |  |  |  |  |  |  |  |
| Methoxyfenozide                                          | 99.8 | inactive |  |  |  |  |  |  |  |
| Methyl (RS)-2-[4-(2,4-dichlorophenoxy)phenoxy]propionate | 100  | inactive |  |  |  |  |  |  |  |
| Methyl 2-aminobenzoate                                   | 100  | inactive |  |  |  |  |  |  |  |
| Methyl dodecanoate                                       | 100  | inactive |  |  |  |  |  |  |  |
| Methyl isothiocyanate                                    | 100  | inactive |  |  |  |  |  |  |  |
| Methyl methanesulfonate                                  | 100  | inactive |  |  |  |  |  |  |  |
| Methyl octanoate                                         | 100  | inactive |  |  |  |  |  |  |  |
| Methyl parathion                                         | 100  | inactive |  |  |  |  |  |  |  |
| Methyl salicylate                                        | 100  | inactive |  |  |  |  |  |  |  |
| Methyldopa sesquihydrate                                 | 100  | inactive |  |  |  |  |  |  |  |
| Methyleugenol                                            | 100  | inactive |  |  |  |  |  |  |  |
| Methylparaben                                            | 100  | inactive |  |  |  |  |  |  |  |

|                                                        |      |          |  |  |  |  |  |  |  |
|--------------------------------------------------------|------|----------|--|--|--|--|--|--|--|
| Metribuzin                                             | 100  | inactive |  |  |  |  |  |  |  |
| Mevinphos                                              | 100  | inactive |  |  |  |  |  |  |  |
| Michler's ketone                                       | 100  | inactive |  |  |  |  |  |  |  |
| Mifepristone                                           | 100  | inactive |  |  |  |  |  |  |  |
| Mirex                                                  | 100  | inactive |  |  |  |  |  |  |  |
| MK-547                                                 | 100  | inactive |  |  |  |  |  |  |  |
| MK-812                                                 | 100  | inactive |  |  |  |  |  |  |  |
| Monobenzyl phthalate                                   | 100  | inactive |  |  |  |  |  |  |  |
| Monobutyl phthalate                                    | 100  | inactive |  |  |  |  |  |  |  |
| Monocrotophos                                          | 100  | inactive |  |  |  |  |  |  |  |
| Monomethyl phthalate                                   | 100  | inactive |  |  |  |  |  |  |  |
| Monuron                                                | 100  | inactive |  |  |  |  |  |  |  |
| Myrcene                                                | 100  | inactive |  |  |  |  |  |  |  |
| N,N,4-Trimethylaniline                                 | 100  | inactive |  |  |  |  |  |  |  |
| N,N,Nâ€²,Nâ€²-Tetrakis(2-hydroxypropyl)ethylenediamine | 100  | inactive |  |  |  |  |  |  |  |
| N,N-Diethylaniline                                     | 100  | inactive |  |  |  |  |  |  |  |
| N,N-Diethylethanolamine                                | 100  | inactive |  |  |  |  |  |  |  |
| N,N-Dimethylaniline                                    | 103  | inactive |  |  |  |  |  |  |  |
| N,N-Dimethyldecylamine oxide                           | 100  | inactive |  |  |  |  |  |  |  |
| N,N-Dimethyloctylamine                                 | 100  | inactive |  |  |  |  |  |  |  |
| N,N'-Methylenebisacrylamide                            | 100  | inactive |  |  |  |  |  |  |  |
| Naphthalene                                            | 100  | inactive |  |  |  |  |  |  |  |
| N-Ethyl-3-methylaniline                                | 100  | inactive |  |  |  |  |  |  |  |
| N-Ethylaniline                                         | 100  | inactive |  |  |  |  |  |  |  |
| N-Ethylperfluorooctanesulfonamide                      | 100  | inactive |  |  |  |  |  |  |  |
| Nicotine                                               | 99.9 | inactive |  |  |  |  |  |  |  |
| Nicotinic acid                                         | 100  | inactive |  |  |  |  |  |  |  |
| Nitrapyrin                                             | 100  | inactive |  |  |  |  |  |  |  |
| Nitrilotriacetic acid                                  | 91.6 | inactive |  |  |  |  |  |  |  |
| Nitrobenzene                                           | 100  | inactive |  |  |  |  |  |  |  |
| Nitrofen                                               | 100  | inactive |  |  |  |  |  |  |  |
| N-Methyl-2-pyrrolidone                                 | 100  | inactive |  |  |  |  |  |  |  |
| N-Methylacetamide                                      | 100  | inactive |  |  |  |  |  |  |  |
| N-Methyldioctylamine                                   | 100  | inactive |  |  |  |  |  |  |  |
| N-Nitrosodibutylamine                                  | 100  | inactive |  |  |  |  |  |  |  |
| N-Nitrosodiethylamine                                  | 100  | inactive |  |  |  |  |  |  |  |
| N-Nitrosodimethylamine                                 | 100  | inactive |  |  |  |  |  |  |  |
| N-Nitrosodiphenylamine                                 | 100  | inactive |  |  |  |  |  |  |  |
| N-Nitrosodipropylamine                                 | 100  | inactive |  |  |  |  |  |  |  |
| Nonanoic acid                                          | 100  | inactive |  |  |  |  |  |  |  |
| Norethindrone                                          | 100  | inactive |  |  |  |  |  |  |  |

|                                     |      |          |  |  |  |  |  |  |  |
|-------------------------------------|------|----------|--|--|--|--|--|--|--|
| Norflurazon                         | 100  | inactive |  |  |  |  |  |  |  |
| Novaluron                           | 100  | inactive |  |  |  |  |  |  |  |
| N-Phenyl-1,4-benzenediamine         | 100  | inactive |  |  |  |  |  |  |  |
| N-Vinyl-2-pyrrolidone               | 100  | inactive |  |  |  |  |  |  |  |
| o-(Chloroacetylcarbamoyl)fumagillol | 32.2 | inactive |  |  |  |  |  |  |  |
| o,p'-DDT                            | 100  | inactive |  |  |  |  |  |  |  |
| o-Cresol                            | 100  | inactive |  |  |  |  |  |  |  |
| Octabenzene                         | 100  | inactive |  |  |  |  |  |  |  |
| Octadecanoic acid                   | 50   | inactive |  |  |  |  |  |  |  |
| Octamethylcyclotetrasiloxane        | 100  | inactive |  |  |  |  |  |  |  |
| Octanal                             | 100  | inactive |  |  |  |  |  |  |  |
| Octanoic acid                       | 100  | inactive |  |  |  |  |  |  |  |
| Octrizole                           | 100  | inactive |  |  |  |  |  |  |  |
| Oxamyl                              | 100  | inactive |  |  |  |  |  |  |  |
| Oxazolidine-E                       | 100  | inactive |  |  |  |  |  |  |  |
| Oxyfluorfen                         | 100  | inactive |  |  |  |  |  |  |  |
| Oxytetracycline dihydrate           | 100  | inactive |  |  |  |  |  |  |  |
| Oxytetracycline hydrochloride       | 100  | inactive |  |  |  |  |  |  |  |
| p,p'-DDD                            | 100  | inactive |  |  |  |  |  |  |  |
| p,p'-DDE                            | 100  | inactive |  |  |  |  |  |  |  |
| Paclobutrazol                       | 100  | inactive |  |  |  |  |  |  |  |
| Parathion                           | 100  | inactive |  |  |  |  |  |  |  |
| p-Bromodiphenyl ether               | 100  | inactive |  |  |  |  |  |  |  |
| p-Cresol                            | 100  | inactive |  |  |  |  |  |  |  |
| p-Cymene                            | 100  | inactive |  |  |  |  |  |  |  |
| PD 0200347                          | 100  | inactive |  |  |  |  |  |  |  |
| Penoxsulam                          | 100  | inactive |  |  |  |  |  |  |  |
| Pentachloronitrobenzene             | 100  | inactive |  |  |  |  |  |  |  |
| Pentachloropyridine                 | 100  | inactive |  |  |  |  |  |  |  |
| Pentadecane                         | 100  | inactive |  |  |  |  |  |  |  |
| Pentaerythritol                     | 100  | inactive |  |  |  |  |  |  |  |
| Pentaerythritol dibromide           | 100  | inactive |  |  |  |  |  |  |  |
| Pentamidine isethionate             | 87.3 | inactive |  |  |  |  |  |  |  |
| Pentanal                            | 100  | inactive |  |  |  |  |  |  |  |
| Pentane-1,5-diyl dibenzoate         | 100  | inactive |  |  |  |  |  |  |  |
| Pentyl acetate                      | 100  | inactive |  |  |  |  |  |  |  |
| Perfluoroheptanoic acid             | 100  | inactive |  |  |  |  |  |  |  |
| Perfluorohexanoic acid              | 100  | inactive |  |  |  |  |  |  |  |
| Perfluorononanoic acid              | 100  | inactive |  |  |  |  |  |  |  |
| Perfluorooctanesulfonic acid        | 100  | inactive |  |  |  |  |  |  |  |
| Perfluorooctanoic acid              | 100  | inactive |  |  |  |  |  |  |  |



|                                    |      |          |  |  |  |  |  |  |  |
|------------------------------------|------|----------|--|--|--|--|--|--|--|
| Permethrin                         | 100  | inactive |  |  |  |  |  |  |  |
| PHA-00543613                       | 100  | inactive |  |  |  |  |  |  |  |
| PHA-00568487                       | 100  | inactive |  |  |  |  |  |  |  |
| PharmaGSID_47263                   | 100  | inactive |  |  |  |  |  |  |  |
| PharmaGSID_47330                   | 100  | inactive |  |  |  |  |  |  |  |
| PharmaGSID_47333                   | 100  | inactive |  |  |  |  |  |  |  |
| PharmaGSID_48166                   | 100  | inactive |  |  |  |  |  |  |  |
| PharmaGSID_48505                   | 100  | inactive |  |  |  |  |  |  |  |
| PharmaGSID_48506                   | 100  | inactive |  |  |  |  |  |  |  |
| PharmaGSID_48507                   | 100  | inactive |  |  |  |  |  |  |  |
| PharmaGSID_48509                   | 100  | inactive |  |  |  |  |  |  |  |
| PharmaGSID_48511                   | 93.1 | inactive |  |  |  |  |  |  |  |
| PharmaGSID_48516                   | 100  | inactive |  |  |  |  |  |  |  |
| PharmaGSID_48518                   | 100  | inactive |  |  |  |  |  |  |  |
| PharmaGSID_48521                   | 90   | inactive |  |  |  |  |  |  |  |
| Phenanthrene                       | 100  | inactive |  |  |  |  |  |  |  |
| Phenol                             | 100  | inactive |  |  |  |  |  |  |  |
| Phenolphthalin                     | 100  | inactive |  |  |  |  |  |  |  |
| Phenothiazine                      | 100  | inactive |  |  |  |  |  |  |  |
| Phosalone                          | 100  | inactive |  |  |  |  |  |  |  |
| Phosmet                            | 100  | inactive |  |  |  |  |  |  |  |
| Picloram                           | 100  | inactive |  |  |  |  |  |  |  |
| Pioglitazone hydrochloride         | 100  | inactive |  |  |  |  |  |  |  |
| Piperazine                         | 100  | inactive |  |  |  |  |  |  |  |
| Piperonyl butoxide                 | 101  | inactive |  |  |  |  |  |  |  |
| Piragliatin                        | 25   | inactive |  |  |  |  |  |  |  |
| Pirimicarb                         | 100  | inactive |  |  |  |  |  |  |  |
| PK 11195                           | 63.6 | inactive |  |  |  |  |  |  |  |
| Potassium perfluorobutanesulfonate | 105  | inactive |  |  |  |  |  |  |  |
| Potassium perfluorohexanesulfonate | 100  | inactive |  |  |  |  |  |  |  |
| Potassium perfluorooctanesulfonate | 96.2 | inactive |  |  |  |  |  |  |  |
| Pravastatin sodium                 | 50   | inactive |  |  |  |  |  |  |  |
| Prednisone                         | 100  | inactive |  |  |  |  |  |  |  |
| Procymidone                        | 100  | inactive |  |  |  |  |  |  |  |
| Prodiamine                         | 99.8 | inactive |  |  |  |  |  |  |  |
| Prometon                           | 100  | inactive |  |  |  |  |  |  |  |
| Prometryn                          | 100  | inactive |  |  |  |  |  |  |  |
| Propamocarb hydrochloride          | 100  | inactive |  |  |  |  |  |  |  |
| Propazine                          | 100  | inactive |  |  |  |  |  |  |  |
| Propoxur                           | 100  | inactive |  |  |  |  |  |  |  |
| Propoxycarbazone-sodium            | 100  | inactive |  |  |  |  |  |  |  |

|                                |      |          |  |  |  |  |  |  |  |
|--------------------------------|------|----------|--|--|--|--|--|--|--|
| Propyl gallate                 | 100  | inactive |  |  |  |  |  |  |  |
| Propylbenzene                  | 100  | inactive |  |  |  |  |  |  |  |
| Propyzamide                    | 100  | inactive |  |  |  |  |  |  |  |
| Pymetrozine                    | 100  | inactive |  |  |  |  |  |  |  |
| Pyraflufen-ethyl               | 100  | inactive |  |  |  |  |  |  |  |
| Pyrene                         | 100  | inactive |  |  |  |  |  |  |  |
| Pyridoxine                     | 100  | inactive |  |  |  |  |  |  |  |
| Pyrimethamine                  | 100  | inactive |  |  |  |  |  |  |  |
| Pyrimethanil                   | 100  | inactive |  |  |  |  |  |  |  |
| Pyrithiobac-sodium             | 100  | inactive |  |  |  |  |  |  |  |
| Quercetin                      | 100  | inactive |  |  |  |  |  |  |  |
| Quinclorac                     | 100  | inactive |  |  |  |  |  |  |  |
| Quinoline                      | 100  | inactive |  |  |  |  |  |  |  |
| Quinoxifen                     | 100  | inactive |  |  |  |  |  |  |  |
| Quizalofop-ethyl               | 85.9 | inactive |  |  |  |  |  |  |  |
| Raloxifene hydrochloride       | 100  | inactive |  |  |  |  |  |  |  |
| Reserpine                      | 84.6 | inactive |  |  |  |  |  |  |  |
| Resorcinol                     | 100  | inactive |  |  |  |  |  |  |  |
| Retinol                        | 104  | inactive |  |  |  |  |  |  |  |
| Rifampicin                     | 100  | inactive |  |  |  |  |  |  |  |
| Safrole                        | 100  | inactive |  |  |  |  |  |  |  |
| SAR102608                      | 100  | inactive |  |  |  |  |  |  |  |
| SAR102779                      | 100  | inactive |  |  |  |  |  |  |  |
| SAR377142                      | 100  | inactive |  |  |  |  |  |  |  |
| SB202235                       | 100  | inactive |  |  |  |  |  |  |  |
| SB243213A                      | 92.2 | inactive |  |  |  |  |  |  |  |
| SB281832                       | 100  | inactive |  |  |  |  |  |  |  |
| SB413217A                      | 46.6 | inactive |  |  |  |  |  |  |  |
| Sethoxydim                     | 100  | inactive |  |  |  |  |  |  |  |
| Silica                         | 100  | inactive |  |  |  |  |  |  |  |
| Simazine                       | 100  | inactive |  |  |  |  |  |  |  |
| Simvastatin                    | 100  | inactive |  |  |  |  |  |  |  |
| Sodium (2-pyridylthio)-N-oxide | 100  | inactive |  |  |  |  |  |  |  |
| Sodium benzoate                | 100  | inactive |  |  |  |  |  |  |  |
| Sodium chlorite                | 100  | inactive |  |  |  |  |  |  |  |
| Sodium dehydroacetate          | 100  | inactive |  |  |  |  |  |  |  |
| Sodium dimethyldithiocarbamate | 100  | inactive |  |  |  |  |  |  |  |
| Sodium dodecyl sulfate         | 100  | inactive |  |  |  |  |  |  |  |
| Sodium dodecylbenzenesulfonate | 100  | inactive |  |  |  |  |  |  |  |
| Sodium erythorbate (1:1)       | 100  | inactive |  |  |  |  |  |  |  |
| Sodium hexyldecyl sulfate      | 49.9 | inactive |  |  |  |  |  |  |  |

|                                     |      |          |  |  |  |  |  |  |  |
|-------------------------------------|------|----------|--|--|--|--|--|--|--|
| Sodium L-ascorbate                  | 100  | inactive |  |  |  |  |  |  |  |
| Sodium myristyl sulfate             | 100  | inactive |  |  |  |  |  |  |  |
| Sodium nitrite                      | 100  | inactive |  |  |  |  |  |  |  |
| Sodium saccharin hydrate            | 100  | inactive |  |  |  |  |  |  |  |
| Sodium trichloroacetate             | 100  | inactive |  |  |  |  |  |  |  |
| Sodium xylenesulfonate              | 100  | inactive |  |  |  |  |  |  |  |
| Sorbitan, mono-(9Z)-9-octadecenoate | 100  | inactive |  |  |  |  |  |  |  |
| Spirodiclofen                       | 100  | inactive |  |  |  |  |  |  |  |
| Spironolactone                      | 100  | inactive |  |  |  |  |  |  |  |
| Spiroxamine                         | 100  | inactive |  |  |  |  |  |  |  |
| SR144190                            | 100  | inactive |  |  |  |  |  |  |  |
| SR146131 trifluoroacetate (1:1)     | 100  | inactive |  |  |  |  |  |  |  |
| SR271425                            | 100  | inactive |  |  |  |  |  |  |  |
| SSR 103800                          | 92.6 | inactive |  |  |  |  |  |  |  |
| SSR 240612                          | 66.3 | inactive |  |  |  |  |  |  |  |
| SSR 241586 HCl                      | 61.5 | inactive |  |  |  |  |  |  |  |
| SSR146977                           | 25   | inactive |  |  |  |  |  |  |  |
| SSR161421                           | 100  | inactive |  |  |  |  |  |  |  |
| SSR162369                           | 100  | inactive |  |  |  |  |  |  |  |
| SSR180711                           | 100  | inactive |  |  |  |  |  |  |  |
| SSR504734                           | 100  | inactive |  |  |  |  |  |  |  |
| SSR69071                            | 25   | inactive |  |  |  |  |  |  |  |
| Stavudine                           | 100  | inactive |  |  |  |  |  |  |  |
| Styrene oxide                       | 100  | inactive |  |  |  |  |  |  |  |
| Sucrose                             | 100  | inactive |  |  |  |  |  |  |  |
| Sucrose octaacetate                 | 75.4 | inactive |  |  |  |  |  |  |  |
| Sulfasalazine                       | 100  | inactive |  |  |  |  |  |  |  |
| Sulfentrazone                       | 100  | inactive |  |  |  |  |  |  |  |
| Surinabant                          | 100  | inactive |  |  |  |  |  |  |  |
| Symclosene                          | 100  | inactive |  |  |  |  |  |  |  |
| Tamoxifen                           | 50   | inactive |  |  |  |  |  |  |  |
| Tannic acid                         | 100  | inactive |  |  |  |  |  |  |  |
| Tebufenozide                        | 100  | inactive |  |  |  |  |  |  |  |
| Tebuthiuron                         | 100  | inactive |  |  |  |  |  |  |  |
| Tefluthrin                          | 100  | inactive |  |  |  |  |  |  |  |
| Tepraloxydim                        | 100  | inactive |  |  |  |  |  |  |  |
| Terbacil                            | 100  | inactive |  |  |  |  |  |  |  |
| Terbufos                            | 100  | inactive |  |  |  |  |  |  |  |
| Terbutylazine                       | 100  | inactive |  |  |  |  |  |  |  |
| tert-Butyl perbenzoate              | 100  | inactive |  |  |  |  |  |  |  |
| tert-Butylbenzene                   | 100  | inactive |  |  |  |  |  |  |  |

|                                          |      |          |  |  |  |  |  |  |  |
|------------------------------------------|------|----------|--|--|--|--|--|--|--|
| tert-Butylhydroquinone                   | 100  | inactive |  |  |  |  |  |  |  |
| Tetracycline                             | 100  | inactive |  |  |  |  |  |  |  |
| Thalidomide                              | 100  | inactive |  |  |  |  |  |  |  |
| Theobromine                              | 41.9 | inactive |  |  |  |  |  |  |  |
| Theophylline                             | 100  | inactive |  |  |  |  |  |  |  |
| Thiabendazole                            | 100  | inactive |  |  |  |  |  |  |  |
| Thiacloprid                              | 100  | inactive |  |  |  |  |  |  |  |
| Thiamethoxam                             | 100  | inactive |  |  |  |  |  |  |  |
| Thiazopyr                                | 100  | inactive |  |  |  |  |  |  |  |
| Thidiazuron                              | 100  | inactive |  |  |  |  |  |  |  |
| Thiobencarb                              | 100  | inactive |  |  |  |  |  |  |  |
| Thiodicarb                               | 100  | inactive |  |  |  |  |  |  |  |
| Thiophanate-methyl                       | 100  | inactive |  |  |  |  |  |  |  |
| Thiram                                   | 100  | inactive |  |  |  |  |  |  |  |
| Thymol                                   | 100  | inactive |  |  |  |  |  |  |  |
| Tolazamide                               | 100  | inactive |  |  |  |  |  |  |  |
| Toluene 2,4-diisocyanate                 | 100  | inactive |  |  |  |  |  |  |  |
| Tralkoxydim                              | 100  | inactive |  |  |  |  |  |  |  |
| Trelanserin                              | 100  | inactive |  |  |  |  |  |  |  |
| Triacetin                                | 100  | inactive |  |  |  |  |  |  |  |
| Triadimenol                              | 100  | inactive |  |  |  |  |  |  |  |
| Tri-allate                               | 100  | inactive |  |  |  |  |  |  |  |
| Triamcinolone                            | 100  | inactive |  |  |  |  |  |  |  |
| Tribufos                                 | 100  | inactive |  |  |  |  |  |  |  |
| Tributylamine                            | 100  | inactive |  |  |  |  |  |  |  |
| Trichlorfon                              | 100  | inactive |  |  |  |  |  |  |  |
| Trichloroacetic acid                     | 100  | inactive |  |  |  |  |  |  |  |
| Triclocarban                             | 100  | inactive |  |  |  |  |  |  |  |
| Tridemorph                               | 100  | inactive |  |  |  |  |  |  |  |
| Triethanolamine                          | 100  | inactive |  |  |  |  |  |  |  |
| Triethoxyoctylsilane                     | 100  | inactive |  |  |  |  |  |  |  |
| Triethyl citrate                         | 100  | inactive |  |  |  |  |  |  |  |
| Triethylene glycol                       | 100  | inactive |  |  |  |  |  |  |  |
| Triethylene glycol bis(2-ethylhexanoate) | 100  | inactive |  |  |  |  |  |  |  |
| Triethylene glycol diacetate             | 100  | inactive |  |  |  |  |  |  |  |
| Triethylene glycol dimethyl ether        | 100  | inactive |  |  |  |  |  |  |  |
| Trifloxysulfuron-sodium                  | 100  | inactive |  |  |  |  |  |  |  |
| Trifluralin                              | 100  | inactive |  |  |  |  |  |  |  |
| Triglycidyl isocyanurate                 | 100  | inactive |  |  |  |  |  |  |  |
| Triisononyl trimellitate                 | 100  | inactive |  |  |  |  |  |  |  |
| Triocetyl trimellitate                   | 101  | inactive |  |  |  |  |  |  |  |

|                                       |      |          |  |  |  |  |  |  |  |
|---------------------------------------|------|----------|--|--|--|--|--|--|--|
| Triphenyl phosphate                   | 100  | inactive |  |  |  |  |  |  |  |
| Triphenyl phosphite                   | 100  | inactive |  |  |  |  |  |  |  |
| Tripropylene glycol monomethyl ether  | 100  | inactive |  |  |  |  |  |  |  |
| Tris(1,3-dichloro-2-propyl) phosphate | 100  | inactive |  |  |  |  |  |  |  |
| Tris(2-chloroethyl) phosphate         | 100  | inactive |  |  |  |  |  |  |  |
| Tris(2-ethylhexyl) phosphate          | 100  | inactive |  |  |  |  |  |  |  |
| Tris(2-ethylhexyl) trimellitate       | 100  | inactive |  |  |  |  |  |  |  |
| Triticonazole                         | 99.6 | inactive |  |  |  |  |  |  |  |
| UK-333747                             | 100  | inactive |  |  |  |  |  |  |  |
| UK-337312                             | 100  | inactive |  |  |  |  |  |  |  |
| UK-343664                             | 50   | inactive |  |  |  |  |  |  |  |
| UK-416244                             | 100  | inactive |  |  |  |  |  |  |  |
| Undecane                              | 100  | inactive |  |  |  |  |  |  |  |
| Urea                                  | 100  | inactive |  |  |  |  |  |  |  |
| Urethane                              | 100  | inactive |  |  |  |  |  |  |  |
| Valproic acid                         | 100  | inactive |  |  |  |  |  |  |  |
| Vernolate                             | 100  | inactive |  |  |  |  |  |  |  |
| Vinclozolin                           | 100  | inactive |  |  |  |  |  |  |  |
| Volinanserin                          | 100  | inactive |  |  |  |  |  |  |  |
| Warfarin                              | 100  | inactive |  |  |  |  |  |  |  |
| YM218                                 | 62.7 | inactive |  |  |  |  |  |  |  |
| Zamifenacin                           | 100  | inactive |  |  |  |  |  |  |  |
| Zenarestat                            | 50   | inactive |  |  |  |  |  |  |  |
