# Supplementary material
Source: PubMed Central journal article supplement (PMC10626520)

## Supplemental Material

### **Respirometric Screening and Characterization of Mitochondrial Toxicants Within the ToxCast Phase I and II Chemical Libraries**

---

Daniel R. Hallinger<sup>1</sup>, Hayley B. Lindsay<sup>2</sup>, Katie Paul Friedman<sup>1</sup>, Danielle A. Suarez<sup>3</sup>, and Steven O. Simmons<sup>1</sup>

<sup>1</sup>National Center for Computational Toxicology; <sup>2</sup>Oak Ridge Associated Universities, Contractor; <sup>3</sup>Environmental and Public Health Division, National Health and Environmental Effects Research Laboratory, Office of Research and Development, U.S. Environmental Protection Agency

Authors DRH and HBL contributed equally to this work.

**Corresponding Author:**

Steven O. Simmons, Ph.D.  
109 TW Alexander Drive  
MD B205-01  
Research Triangle Park, North Carolina 27711 USA

**Supplemental Figure 1 shows the median fold inhibition for basal (A) and maximal (B) respiration phases for nine test chemicals represented as 18 internally-duplicated samples used to measure intra-assay reproducibility (red dashed lines show threshold used to define bioactivity).**

### Basal Respiration

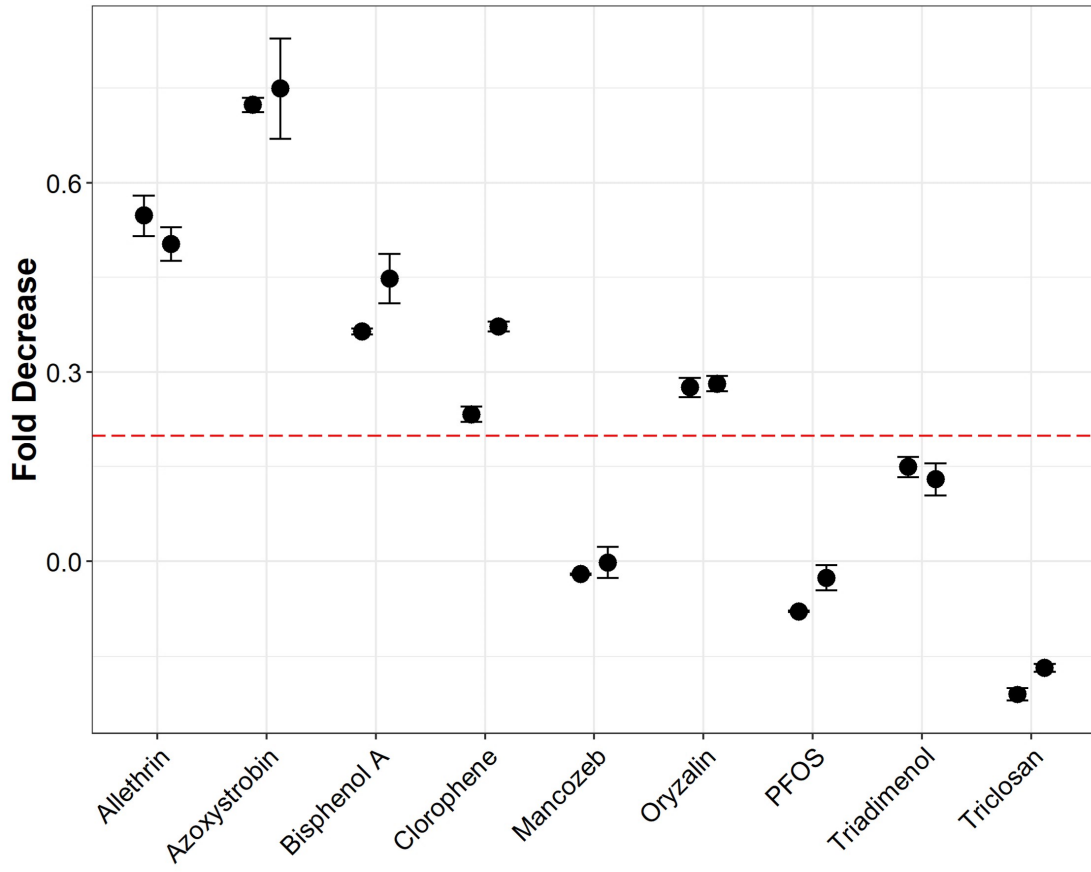

### Maximal Respiration

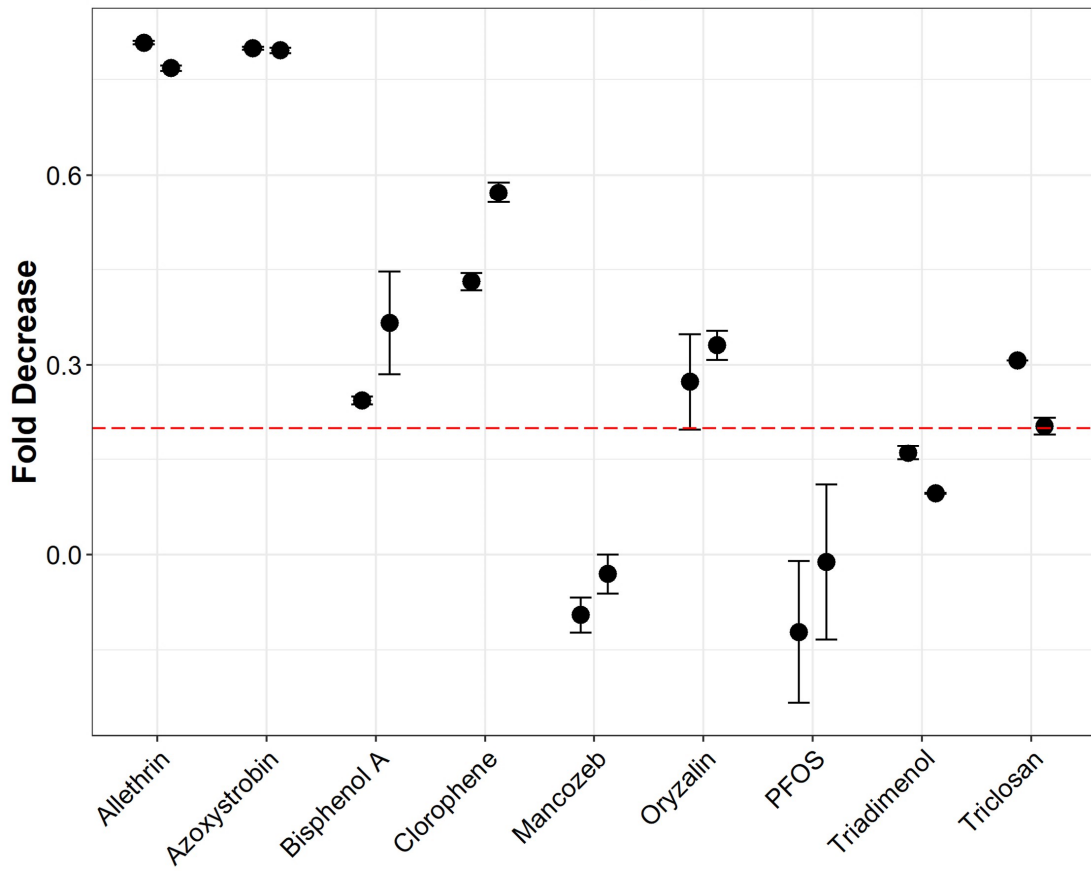

Supplement: NIHMS1679657-supplement-S2.pdf [file NIHMS1679657-supplement-S2.pdf]
